# Supplementary material for: Structure-guided secretome analysis of gall-forming microbes offers insights into effector diversity and evolution
Source: bioRxiv preprint, doi:10.1101/2024.09.03.609900, version 3 (2025-06-27)
Supplement: Table S1 [file 609900_file09.xlsx]

## Sheet: Overview
Detailled information about the pathogens investigated in this study and their secretome composition.
Pathogen	Taxonomy	Disease	Secretome	Models obtained	pLDDT > 65	Interproscan annotation (pfam+ Gene3D+ Superfamily)	% with known domain	% orphan
Plasmodiophora brassicae	Plasmodiophorid	clubroot gall on brassica	806	800	480	414	51.3648	48.6352
Spongospora subterranea	Plasmodiophorid	powdery scab of potato tuber	576	574	286	179	31.0764	68.9236
Polymyxa betae	Plasmodiophorid	rhizomania	714	687	249	253	35.4342	64.5658
Albugo candida	Oomycete	white blister of brassicaceae	594	594	365	214	36.0269	63.9731
Taphrina deformans	Ascomycota	peach leaf curl/ gall	199	195	126	127	63.8191	36.1809
Ustilago maydis	Basidiomycota	maize smut	582	582	454	301	51.7182	48.2818
Synchytrium endobioticum	Chytridiomycota	potato wart	726	725	389	155	21.3499	78.6501
			4197	4157	2349

## Sheet: pLDDT+IUPred3
pLDDT score and IUPred3 analysis of proteins for each phytopathogen studied here.
P. brassicae	pLDDT	IUPred3		S. subterranea	pLDDT	IUPred3		P. betae	pLDDT	IUPred3		A. candida	pLDDT	IUPred3		T. deformans	pLDDT	IUPred3		U. maydis	pLDDT	IUPred3		S. endobioticum	pLDDT	IUPred3
PBTT_05450	97.5113	Non-Disordered		A0A0H5QGZ6	97.5959	Non-Disordered		poly_jg6408.t1	96.4071	Non-Disordered		A0A024GMV3	97.429	#N/A		R4XEF8	97.3708	Non-Disordered		UMAG_KIS69158.1	98.292	Non-Disordered		A0A507C876	97.0543	Non-Disordered
PBTT_09879	97.1289	Non-Disordered		A0A0H5R2Z9	97.355	Non-Disordered		poly_jg6310.t1	96.0591	Non-Disordered		A0A024GTT4	97.2126	Non-Disordered		R4XIT9	96.5326	Non-Disordered		UMAG_KIS71527.1	97.254	Non-Disordered		A0A507CRA2	96.8153	Non-Disordered
PBTT_04207	97.0692	Non-Disordered		A0A0H5QNZ4	96.832	Non-Disordered		poly_jg6696.t1	96.0553	Non-Disordered		A0A024GN06	97.2064	Non-Disordered		R4XD87	96.4892	Non-Disordered		UMAG_KIS68444.1	96.969	Non-Disordered		A0A507D859	96.5657	Non-Disordered
PBTT_05049	96.8792	Non-Disordered		A0A0H5RSY0	96.2029	Non-Disordered		poly_jg3385.t1	95.8611	Non-Disordered		A0A024GIG4	97.009	Non-Disordered		R4XBH6	96.2805	Non-Disordered		UMAG_00330	96.952	Non-Disordered		A0A507D508	96.2768	Non-Disordered
PBTT_06000	96.8774	Non-Disordered		A0A0H5RLG7	96.038	Non-Disordered		poly_jg1313.t1	95.4953	Non-Disordered		A0A024GNJ1	96.7238	#N/A		R4XHE9	96.0945	Non-Disordered		UMAG_06073	96.598	Non-Disordered		A0A507CAQ2	95.926	Non-Disordered
PBTT_03625	96.8696	Non-Disordered		A0A0H5QK59	95.645	Non-Disordered		poly_jg5798.t1	95.3053	Non-Disordered		A0A024GMJ0	96.6187	Non-Disordered		R4XHK2	95.9228	Non-Disordered		UMAG_12007	96.544	Non-Disordered		A0A507D3J8	95.3612	Non-Disordered
PBTT_06001	96.7569	Non-Disordered		A0A0H5QI92	95.5796	Non-Disordered		poly_jg2877.t1	94.6266	Non-Disordered		A0A024GSG7	96.1564	Non-Disordered		R4XM90	95.4024	Non-Disordered		UMAG_KIS67202.1	96.374	Non-Disordered		A0A507DMC0	95.346	Non-Disordered
PBTT_06857	96.6677	Non-Disordered		A0A0H5QTQ7	95.5767	Non-Disordered		poly_jg10190.t1	94.3923	Non-Disordered		A0A024GC47	96.1301	Non-Disordered		R4X8N9	95.3934	Non-Disordered		UMAG_02506	96.242	Non-Disordered		A0A507CZU1	94.8304	Non-Disordered
PBTT_09908	96.5223	Non-Disordered		A0A0H5R0Z9	95.2274	Non-Disordered		poly_jg6348.t1	94.3852	Non-Disordered		A0A024G094	95.9258	Non-Disordered		R4XD23	95.2123	Non-Disordered		UMAG_11303	96.149	Non-Disordered		A0A507CQU6	94.7476	Non-Disordered
PBTT_03624	96.5154	Non-Disordered		A0A0H5QSM4	95.2067	Non-Disordered		poly_jg7980.t1	94.377	Non-Disordered		A0A024GBC8	95.7789	Non-Disordered		R4XFA3	94.7017	Non-Disordered		UMAG_01014	96.085	Non-Disordered		A0A507CVP3	94.638	Non-Disordered
PBTT_02890	96.2303	Non-Disordered		A0A0H5QN76	95.1528	Non-Disordered		poly_jg7732.t1	94.2911	Non-Disordered		A0A024G4U0	95.4778	Non-Disordered		R4XCJ2	94.5505	Non-Disordered		UMAG_KIS69393.1	96.006	Non-Disordered		A0A507D7B9	94.2634	Non-Disordered
PBTT_05773	96.163	Non-Disordered		A0A0H5QJ92	95.0495	Non-Disordered		poly_jg5415.t1	94.2618	Non-Disordered		A0A024G590	95.2974	Non-Disordered		R4XD45	94.1069	Non-Disordered		UMAG_02035	95.87	Non-Disordered		A0A507DTV3	94.0773	Non-Disordered
PBTT_03948	96.1307	Non-Disordered		A0A0H5QRP2	94.6595	Non-Disordered		poly_jg7047.t2	94.2227	Non-Disordered		A0A024G0T1	95.2608	Non-Disordered		R4XDB8	94.0847	Non-Disordered		UMAG_00445	95.839	Non-Disordered		A0A507DBT8	93.9885	Non-Disordered
PBTT_01527	96.001	Non-Disordered		A0A0H5QK74	94.5222	Non-Disordered		poly_jg36.t1	94.0699	Non-Disordered		A0A024G557	95.1455	Non-Disordered		R4XN35	93.834	Non-Disordered		UMAG_03023	95.827	Non-Disordered		A0A507D4Q6	93.942	Non-Disordered
PBTT_08613	95.8557	Non-Disordered		A0A0H5RE28	94.17	Non-Disordered		poly_jg5906.t1	93.844	Non-Disordered		A0A024GC42	95.0057	Non-Disordered		R4X8Z3	93.6981	Non-Disordered		UMAG_03381	95.793	Non-Disordered		A0A507DG67	93.8453	Non-Disordered
PBTT_10114	95.7774	Non-Disordered		A0A0H5RCT3	94.1241	Non-Disordered		poly_jg8314.t1	93.8432	Non-Disordered		A0A024G275	94.9527	Non-Disordered		R4XJ02	93.6479	Non-Disordered		UMAG_04503	95.703	Non-Disordered		A0A507CVP0	93.5219	Non-Disordered
PBTT_09199	95.7709	Non-Disordered		A0A0H5RUR8	93.9497	Non-Disordered		poly_jg4632.t1	93.7888	Non-Disordered		A0A024G4F7	94.9245	Non-Disordered		R4XB27	93.5398	Non-Disordered		UMAG_03382	95.598	Non-Disordered		A0A507D4L9	93.0719	Non-Disordered
PBTT_06650	95.6191	Non-Disordered		A0A0H5QM30	93.3295	Non-Disordered		poly_jg3522.t1	93.6644	Non-Disordered		A0A024FXJ4	94.4417	Non-Disordered		R4X9G4	93.5265	Non-Disordered		UMAG_KIS68312.1	95.594	Non-Disordered		A0A507CLP6	92.9765	Non-Disordered
PBTT_04879	95.5382	Non-Disordered		A0A0H5RK65	93.3295	Non-Disordered		poly_jg5162.t1	93.4716	Non-Disordered		A0A024GFS3	94.3248	Non-Disordered		R4XK89	93.5037	Non-Disordered		UMAG_KIS67043.1	95.586	Non-Disordered		A0A507DA36	92.968	Non-Disordered
PBTT_06909	95.5091	Non-Disordered		A0A0H5R9A7	93.2726	Non-Disordered		poly_jg585.t1	93.4627	Non-Disordered		A0A024G5G7	94.2742	Non-Disordered		R4X7A0	93.2953	Non-Disordered		UMAG_KIS69478.1	95.586	Non-Disordered		A0A507CRF8	92.9303	Non-Disordered
PBTT_05772	95.3367	Non-Disordered		A0A0H5RH28	93.1543	Disordered		poly_jg5295.t1	93.4292	Non-Disordered		A0A024GNP3	94.1247	Non-Disordered		R4XAT3	92.8672	Non-Disordered		UMAG_KIS65674.1	95.512	Non-Disordered		A0A507DET9	92.8955	Non-Disordered
PBTT_03454	95.1694	Non-Disordered		A0A0H5RFZ8	93.0986	Non-Disordered		poly_jg2761.t1	93.3014	Non-Disordered		A0A024G4D2	94.0616	Non-Disordered		R4XFT8	92.8117	Non-Disordered		UMAG_04557	95.489	Non-Disordered		A0A507CYP0	92.7043	Non-Disordered
PBTT_04322	95.1626	Non-Disordered		A0A0H5RKJ1	93.0655	Non-Disordered		poly_jg2515.t1	93.2948	Non-Disordered		A0A024GRW4	93.8905	#N/A		R4X6Q6	92.8036	Non-Disordered		UMAG_KIS70909.1	95.333	Non-Disordered		A0A507D3L8	92.5747	Non-Disordered
PBTT_01198	95.0978	Non-Disordered		A0A0H5R031	92.998	Non-Disordered		poly_jg314.t1	93.1357	Non-Disordered		A0A024GDX4	93.8861	Non-Disordered		R4XMV5	92.7258	Non-Disordered		UMAG_KIS71107.1	95.296	Non-Disordered		A0A507CHX3	92.5343	Non-Disordered
PBTT_05531	95.0175	Non-Disordered		A0A0H5R5V7	92.9542	Non-Disordered		poly_jg6053.t1	93.0273	Non-Disordered		A0A024G5F3	93.8382	Non-Disordered		R4XHL1	92.546	Non-Disordered		UMAG_11112	95.239	Non-Disordered		A0A507DHT3	92.4086	Non-Disordered
PBTT_04984	94.8105	Non-Disordered		A0A0H5RRQ3	92.8341	Non-Disordered		poly_jg4883.t1	92.8512	Non-Disordered		A0A024GRE7	93.8089	Non-Disordered		R4XE18	92.3907	Non-Disordered		UMAG_01604	95.215	Non-Disordered		A0A507DFW7	92.281	Non-Disordered
PBTT_01722	94.6366	Non-Disordered		A0A0H5R3S9	92.7205	Non-Disordered		poly_jg8447.t1	92.8285	Non-Disordered		A0A024FZQ6	93.7369	Non-Disordered		R4XBK7	92.1424	Non-Disordered		UMAG_00637	95.106	Non-Disordered		A0A507DB46	92.1492	Non-Disordered
PBTT_07087	94.6045	Non-Disordered		A0A0H5QRG3	92.5352	Non-Disordered		poly_jg2227.t1	92.7814	Non-Disordered		A0A024GVU8	93.7236	Non-Disordered		R4XE01	91.6645	Non-Disordered		UMAG_03585	95.036	Non-Disordered		A0A507D7J3	91.8169	Non-Disordered
PBTT_08913	94.546	Non-Disordered		A0A0H5RE41	92.4544	Non-Disordered		poly_jg5864.t1	92.7465	Non-Disordered		A0A024G2K6	93.7235	Non-Disordered		R4XGF0	91.6373	Non-Disordered		UMAG_03246	95.035	Non-Disordered		A0A507CH68	91.5703	Non-Disordered
PBTT_09986	94.4597	Non-Disordered		A0A0H5RR36	92.4022	Non-Disordered		poly_jg3538.t1	92.7042	Non-Disordered		A0A024FTE8	93.4523	Non-Disordered		R4XN24	91.6191	Non-Disordered		UMAG_01855	95.016	Non-Disordered		A0A507D7Z1	91.3923	Non-Disordered
PBTT_00020	94.4587	Non-Disordered		A0A0H5QQD8	92.0251	Non-Disordered		poly_jg8863.t1	92.677	Non-Disordered		A0A024G109	93.3769	Non-Disordered		R4XIL6	91.5942	Non-Disordered		UMAG_06428	94.873	Non-Disordered		A0A507CZ67	91.3317	Non-Disordered
PBTT_08517	94.4324	Non-Disordered		A0A0H5QYV3	91.9146	Non-Disordered		poly_jg3854.t1	92.5072	Non-Disordered		A0A024GUF5	93.3415	Non-Disordered		R4XA13	91.5823	Non-Disordered		UMAG_KIS68311.1	94.837	Non-Disordered		A0A507CZL0	91.2382	Non-Disordered
PBTT_08984	94.409	Non-Disordered		A0A0H5R612	91.6583	Non-Disordered		poly_jg733.t1	92.3011	Non-Disordered		A0A024FT20	93.3144	Non-Disordered		R4XG21	91.3868	Non-Disordered		UMAG_02072	94.629	Non-Disordered		A0A507CSR3	91.121	Non-Disordered
PBTT_04015	94.2942	Non-Disordered		A0A0H5RG24	91.532	Non-Disordered		poly_jg6012.t1	92.2733	Non-Disordered		A0A024GCW0	92.8617	Non-Disordered		R4X9K5	91.2473	Non-Disordered		UMAG_02921	94.609	Non-Disordered		A0A507CV42	91.105	Non-Disordered
PBTT_02790	94.2869	Non-Disordered		A0A0H5R9Z6	91.477	Non-Disordered		poly_jg9517.t1	92.1855	Non-Disordered		A0A024G5B3	92.8485	Non-Disordered		R4X8F8	91.1486	Non-Disordered		UMAG_KIS67988.1	94.609	Non-Disordered		A0A507D612	90.7996	Non-Disordered
PBTT_05226	94.2472	Non-Disordered		A0A0H5QVP8	91.2921	Non-Disordered		poly_jg8775.t1	91.8131	Non-Disordered		A0A024G9A0	92.8192	Non-Disordered		R4XB31	91.1361	Non-Disordered		UMAG_01788	94.511	Non-Disordered		A0A507DC32	90.6183	Non-Disordered
PBTT_00105	94.1321	Non-Disordered		A0A0H5R504	91.2793	Non-Disordered		poly_jg2537.t1	91.7778	Non-Disordered		A0A024GE50	92.7711	Non-Disordered		R4XEJ6	90.9965	Non-Disordered		UMAG_02826	94.477	Non-Disordered		A0A507CRJ5	90.1819	Non-Disordered
PBTT_00570	94.1166	Non-Disordered		A0A0H5R2S4	91.0306	Non-Disordered		poly_jg1996.t1	91.7639	Non-Disordered		A0A024GN42	92.7633	Non-Disordered		R4XEQ6	90.9138	Non-Disordered		UMAG_00154	94.42	Non-Disordered		A0A507CEM1	90.1436	Non-Disordered
PBTT_02400	94.1012	Non-Disordered		A0A0H5QKS6	91.018	Non-Disordered		poly_jg5863.t1	91.7281	Non-Disordered		A0A024GQ90	92.6916	Non-Disordered		R4XJU4	90.7848	Non-Disordered		UMAG_KIS71803.1	94.282	Non-Disordered		A0A507DEH4	89.83	Non-Disordered
PBTT_00981	94.0558	Non-Disordered		A0A0H5RDW9	90.8744	Non-Disordered		poly_jg1697.t1	91.7077	Non-Disordered		A0A024GH82	92.3711	Non-Disordered		R4X7K2	90.6734	Non-Disordered		UMAG_02529	94.282	Non-Disordered		A0A507D2Y7	89.5283	Non-Disordered
PBTT_10479	94.0546	Non-Disordered		A0A0H5R0A5	90.7131	Non-Disordered		poly_jg4759.t1	91.6856	Non-Disordered		A0A024FTB6	92.3548	Non-Disordered		R4XD65	90.6174	Non-Disordered		UMAG_05774	94.245	Non-Disordered		A0A507D7R4	89.4478	Non-Disordered
PBTT_01934	94.0391	Non-Disordered		A0A0H5REI1	90.6066	Non-Disordered		poly_jg5979.t1	91.1472	Non-Disordered		A0A024GRJ2	92.094	Non-Disordered		R4XAT8	90.4404	Non-Disordered		UMAG_12261	94.079	Non-Disordered		A0A507BZ84	89.1252	Non-Disordered
PBTT_04427	94.0211	Non-Disordered		A0A0H5QZ27	90.5195	Non-Disordered		poly_jg3503.t1	90.8741	Non-Disordered		A0A024FTD4	91.9849	Non-Disordered		R4XJW2	90.3822	Non-Disordered		UMAG_10861	94.055	Non-Disordered		A0A507BY10	89.0866	Non-Disordered
PBTT_06247	94.0171	Non-Disordered		A0A0H5RGR7	90.4839	Non-Disordered		poly_jg6363.t1	90.7459	Non-Disordered		A0A024G648	91.9118	Non-Disordered		R4X6V3	90.3816	Non-Disordered		UMAG_12083	93.993	Non-Disordered		A0A507CMT9	88.7296	Non-Disordered
PBTT_06911	93.8616	Non-Disordered		A0A0H5QT11	90.4563	Non-Disordered		poly_jg4500.t1	90.4141	Non-Disordered		A0A024G5X0	91.7525	Non-Disordered		R4XBF7	89.6533	Non-Disordered		UMAG_05562	93.992	Non-Disordered		A0A507D230	88.6137	Non-Disordered
PBTT_06769	93.7682	Non-Disordered		A0A0H5QGM8	90.3951	Non-Disordered		poly_jg7577.t1	90.4137	Non-Disordered		A0A024GAD9	91.6375	Non-Disordered		R4XDH2	89.6385	Non-Disordered		UMAG_02157	93.97	Non-Disordered		A0A507DFX9	88.5807	Non-Disordered
PBTT_08014	93.7294	Non-Disordered		A0A0H5QZK3	90.3815	Non-Disordered		poly_jg8064.t1	90.3093	Non-Disordered		A0A024GHT0	91.5952	Non-Disordered		R4X8I6	89.5797	Non-Disordered		UMAG_01937	93.938	Non-Disordered		A0A507CZ25	88.5717	Non-Disordered
PBTT_06811	93.6744	Non-Disordered		A0A0H5R1P3	90.3627	Non-Disordered		poly_jg7783.t1	90.2979	Non-Disordered		A0A024GFG7	91.4998	Non-Disordered		R4XLH6	89.5526	Non-Disordered		UMAG_02204	93.876	Non-Disordered		A0A507CP43	88.5486	Non-Disordered
PBTT_07863	93.5979	Non-Disordered		A0A0H5QGF7	90.2107	Non-Disordered		poly_jg8556.t1	90.2111	Non-Disordered		A0A024GKG1	91.4581	Non-Disordered		R4X6N9	89.5461	Non-Disordered		UMAG_04044	93.754	Non-Disordered		A0A507D2S2	88.4214	Non-Disordered
PBTT_00678	93.5628	Non-Disordered		A0A0H5RPH5	90.1342	Non-Disordered		poly_jg7199.t1	90.1399	Non-Disordered		A0A024G4X7	91.4472	Non-Disordered		R4X7K3	89.3399	Non-Disordered		UMAG_KIS70264.1	93.734	Non-Disordered		A0A507D306	88.3486	Non-Disordered
PBTT_05410	93.5583	Non-Disordered		A0A0H5QGN1	90.1111	Non-Disordered		poly_jg705.t1	90.1189	Non-Disordered		A0A024G1K6	91.3121	Non-Disordered		R4X6K6	89.13	Non-Disordered		UMAG_03140	93.628	Non-Disordered		A0A507D4U7	88.099	Non-Disordered
PBTT_07912	93.5566	Non-Disordered		A0A0H5QI04	89.9537	Non-Disordered		poly_jg4085.t1	90.0888	Non-Disordered		A0A024GL07	91.0749	Non-Disordered		R4XDZ0	88.8492	Non-Disordered		UMAG_10811	93.439	Non-Disordered		A0A507CN49	87.9717	Non-Disordered
PBTT_05719	93.5248	Non-Disordered		A0A0H5R0Z3	89.8736	Non-Disordered		poly_jg9274.t1	89.975	Non-Disordered		A0A024GSC8	91.0303	Non-Disordered		R4XDD6	88.7303	Non-Disordered		UMAG_03630	93.413	Non-Disordered		A0A507C8W5	87.108	Non-Disordered
PBTT_05016	93.5025	Non-Disordered		A0A0H5RDM7	89.8636	Non-Disordered		poly_jg9878.t1	89.9745	Non-Disordered		A0A024FZ13	90.9957	Non-Disordered		R4XKT0	88.5746	Non-Disordered		UMAG_06050	93.397	Non-Disordered		A0A507CTN8	86.9805	Non-Disordered
PBTT_05403	93.4505	Non-Disordered		A0A0H5QKB5	89.7075	Non-Disordered		poly_jg7230.t1	89.7924	Non-Disordered		A0A024GCJ0	90.9889	Non-Disordered		R4XFY1	88.3638	Non-Disordered		UMAG_11931	93.277	Non-Disordered		A0A507DEQ8	86.8249	Non-Disordered
PBTT_00464	93.4175	Non-Disordered		A0A0H5QZK9	89.4543	Non-Disordered		poly_jg1797.t1	89.4094	Non-Disordered		A0A024GNL0	90.9436	Non-Disordered		R4X7U7	88.2587	Non-Disordered		UMAG_KIS68317.1	93.17	Non-Disordered		A0A507BT84	86.7947	Non-Disordered
PBTT_07926	93.1819	Non-Disordered		A0A0H5RGC1	89.3984	Non-Disordered		poly_jg1064.t1	89.3068	Non-Disordered		A0A024GKI3	90.8883	Non-Disordered		R4XPL0	88.2442	Non-Disordered		UMAG_KIS70637.1	93.097	Non-Disordered		A0A507CH60	86.6446	Non-Disordered
PBTT_03594	93.1547	Non-Disordered		A0A0H5QKG4	89.3475	Non-Disordered		poly_jg8229.t1	89.2934	Non-Disordered		A0A024G3P5	90.8837	Non-Disordered		R4X846	88.1026	Non-Disordered		UMAG_04282	93.036	Non-Disordered		A0A507CUQ1	86.5526	Non-Disordered
PBTT_01940	93.1261	Non-Disordered		A0A0H5RU98	89.314	Non-Disordered		poly_jg2755.t1	89.2117	Non-Disordered		A0A024GK75	90.8144	Non-Disordered		R4X6K0	88.0486	Non-Disordered		UMAG_11765	93.021	Non-Disordered		A0A507CQ24	86.28	Non-Disordered
PBTT_05662	93.0291	Non-Disordered		A0A0H5RFI5	89.1741	Non-Disordered		poly_jg803.t1	89.1168	Non-Disordered		A0A024FXK6	90.7823	Non-Disordered		R4XCT8	87.9683	Non-Disordered		UMAG_KIS70996.1	93.009	Non-Disordered		A0A507D791	86.1476	Non-Disordered
PBTT_01356	93.0048	Non-Disordered		A0A0H5REC7	89.1406	Non-Disordered		poly_jg2893.t1	88.9735	Non-Disordered		A0A024GQB9	90.7138	Non-Disordered		R4X8C3	87.942	Non-Disordered		UMAG_12233	93.004	Non-Disordered		A0A507CZ14	86.0736	Non-Disordered
PBTT_03069	93.0038	Non-Disordered		A0A0H5R0B8	89.0249	Non-Disordered		poly_jg137.t1	88.7396	Non-Disordered		A0A024GGI8	90.6799	Non-Disordered		R4X926	87.866	Non-Disordered		UMAG_10000	92.952	Non-Disordered		A0A507CVP1	85.8987	Non-Disordered
PBTT_10111	92.997	Non-Disordered		A0A0H5R3F6	88.8004	Non-Disordered		poly_jg3642.t1	88.6935	Non-Disordered		A0A024GVE2	90.5857	Non-Disordered		R4XAG0	87.8588	Non-Disordered		UMAG_03807	92.95	Non-Disordered		A0A507CJP0	85.8617	Non-Disordered
PBTT_03635	92.9702	Non-Disordered		A0A0H5R4L5	88.7551	Non-Disordered		poly_jg3145.t1	88.6338	Non-Disordered		A0A024G6S6	90.5461	Non-Disordered		R4X8K0	87.7743	Non-Disordered		UMAG_11317	92.837	Non-Disordered		A0A507CPQ2	85.6603	Non-Disordered
PBTT_09658	92.8605	Non-Disordered		A0A0H5R4P0	88.6706	Non-Disordered		poly_jg9773.t1	88.44	Non-Disordered		A0A024GLX7	90.4527	Non-Disordered		R4XF11	87.426	Non-Disordered		UMAG_06357	92.776	Non-Disordered		A0A507D840	85.5981	Non-Disordered
PBTT_04661	92.8133	Non-Disordered		A0A0H5R517	88.5635	Non-Disordered		poly_jg6378.t1	88.4356	Non-Disordered		A0A024GIS7	90.4076	Non-Disordered		R4XDI6	87.0876	Non-Disordered		UMAG_KIS70182.1	92.76	Non-Disordered		A0A507DJ29	85.5806	Non-Disordered
PBTT_02247	92.6766	Non-Disordered		A0A0H5RK69	88.5391	Non-Disordered		poly_jg4948.t1	88.3989	Non-Disordered		A0A024GLT4	90.397	Non-Disordered		R4X6A8	87.0436	Non-Disordered		UMAG_KIS67893.1	92.744	Non-Disordered		A0A507D3A6	85.4623	Non-Disordered
PBTT_01618	92.4779	Non-Disordered		A0A0H5RJF5	88.5303	Non-Disordered		poly_jg4557.t1	88.397	Non-Disordered		A0A024G125	90.3352	Non-Disordered		R4XCE0	86.3919	Non-Disordered		UMAG_KIS70784.1	92.615	Non-Disordered		A0A507BYB6	85.3502	Non-Disordered
PBTT_09645	92.455	Non-Disordered		A0A0H5QZK1	88.4638	Non-Disordered		poly_jg8668.t1	88.1623	Non-Disordered		A0A024GNW5	90.3341	Non-Disordered		R4XBW1	86.0764	Non-Disordered		UMAG_06456	92.484	Non-Disordered		A0A507CRD3	85.3313	Non-Disordered
PBTT_07213	92.3776	Non-Disordered		A0A0H5RDP9	88.3724	Disordered		poly_jg7605.t1	87.8182	Non-Disordered		A0A024GP97	90.206	Non-Disordered		R4X859	86.0036	Non-Disordered		UMAG_00961	92.439	Non-Disordered		A0A507C3N8	85.2834	Non-Disordered
PBTT_05532	92.3757	Non-Disordered		A0A0H5QIA6	88.31	Non-Disordered		poly_jg9057.t1	87.7543	Non-Disordered		A0A024FY42	90.0674	Non-Disordered		R4X9S4	85.9758	Non-Disordered		UMAG_10640	92.439	Non-Disordered		A0A507C8C0	85.2543	Non-Disordered
PBTT_08962	92.3398	Non-Disordered		A0A0H5REB3	88.136	Non-Disordered		poly_jg8902.t1	87.4641	Non-Disordered		A0A024GRX5	90.0152	Non-Disordered		R4X6X6	85.8838	Non-Disordered		UMAG_01501	92.374	Non-Disordered		A0A507CUG5	85.2199	Non-Disordered
PBTT_03654	92.3076	Non-Disordered		A0A0H5RD09	88.0471	Non-Disordered		poly_jg5289.t1	86.5668	Non-Disordered		A0A024GP19	90.0135	Non-Disordered		R4XEQ4	85.5955	Non-Disordered		UMAG_KIS65904.1	92.356	Non-Disordered		A0A507CWV8	85.1822	Non-Disordered
PBTT_07028	92.2572	Non-Disordered		A0A0H5REC0	88.0394	Non-Disordered		poly_jg3091.t1	86.5358	Non-Disordered		A0A024G8R5	89.9045	Non-Disordered		R4XAW9	85.5094	Non-Disordered		UMAG_KIS69965.1	92.324	Non-Disordered		A0A507BZL2	85.1225	Non-Disordered
PBTT_02028	92.2257	Non-Disordered		A0A0H5QQM1	87.9226	Non-Disordered		poly_jg397.t1	86.5054	Non-Disordered		A0A024FUS4	89.8669	Non-Disordered		R4XMF0	85.4965	Non-Disordered		UMAG_03551	92.292	Non-Disordered		A0A507CWJ4	85.0885	Non-Disordered
PBTT_01084	92.1661	Non-Disordered		A0A0H5QPG3	87.8748	Non-Disordered		poly_jg52.t1	86.3153	Non-Disordered		A0A024G2S0	89.8269	Non-Disordered		R4X8D1	85.4671	Non-Disordered		UMAG_06157	92.249	Non-Disordered		A0A507D286	85.0657	Non-Disordered
PBTT_10270	92.1607	Non-Disordered		A0A0H5R3L8	87.8012	Non-Disordered		poly_jg3792.t1	86.0776	Non-Disordered		A0A024GNT6	89.7509	Non-Disordered		R4XG80	85.0764	Non-Disordered		UMAG_02611	92.178	Non-Disordered		A0A507BFS7	84.9967	Non-Disordered
PBTT_09319	92.1371	Non-Disordered		A0A0H5QUJ0	87.7997	Non-Disordered		poly_jg1000.t1	85.9705	Non-Disordered		A0A024G5G8	89.6752	Non-Disordered		R4XAS2	84.1365	Non-Disordered		UMAG_KIS71970.1	92.173	Non-Disordered		A0A507D2V6	84.9917	Non-Disordered
PBTT_09682	92.137	Non-Disordered		A0A0H5QZL4	87.7277	Non-Disordered		poly_jg4788.t1	85.9293	Non-Disordered		A0A024FZT4	89.6244	Non-Disordered		R4XHY8	84.0986	Non-Disordered		UMAG_04362	92.156	Non-Disordered		A0A507DGR4	84.9782	Non-Disordered
PBTT_00819	92.1217	Non-Disordered		A0A0H5QGK1	87.3529	Non-Disordered		poly_jg6763.t1	85.9165	Disordered		A0A024G1T6	89.4596	Non-Disordered		R4XGH7	83.9444	Non-Disordered		UMAG_05964	92.132	Non-Disordered		A0A507D081	84.9514	Non-Disordered
PBTT_05750	92.0478	Non-Disordered		A0A0H5QZJ2	87.3184	Non-Disordered		poly_jg9923.t1	85.6916	Non-Disordered		A0A024FUV0	89.3586	Non-Disordered		R4XCF1	83.7779	Non-Disordered		UMAG_KIS71529.1	92.115	Non-Disordered		A0A507DHZ0	84.8181	Non-Disordered
PBTT_00937	92.0044	Non-Disordered		A0A0H5RPD9	87.2199	Non-Disordered		poly_jg274.t1	85.6405	Non-Disordered		A0A024GBX7	89.3506	Non-Disordered		R4XD93	83.5959	Non-Disordered		UMAG_03011	92.011	Non-Disordered		A0A507CPA9	84.7562	Non-Disordered
PBTT_08150	91.9232	Non-Disordered		A0A0H5QQF2	87.1338	Non-Disordered		poly_jg6147.t1	85.4784	Non-Disordered		A0A024FXJ6	89.3481	Non-Disordered		R4X8S4	83.3744	Non-Disordered		UMAG_05814	91.984	Non-Disordered		A0A507BLL9	84.739	Non-Disordered
PBTT_09822	91.8916	Non-Disordered		A0A0H5R7E0	87.1015	Non-Disordered		poly_jg4819.t1	85.4192	Non-Disordered		A0A024GMD2	89.2862	Non-Disordered		R4XDP0	83.2577	Non-Disordered		UMAG_05930	91.977	Non-Disordered		A0A507DHK8	84.7108	Non-Disordered
PBTT_05086	91.8734	Non-Disordered		A0A0H5R9G5	86.9936	Non-Disordered		poly_jg3797.t1	85.2547	Non-Disordered		A0A024GBH6	89.2464	Non-Disordered		R4X9X3	83.0173	Non-Disordered		UMAG_11723	91.843	Non-Disordered		A0A507D877	84.7033	Non-Disordered
PBTT_06900	91.7477	Non-Disordered		A0A0H5QZK8	86.8323	Non-Disordered		poly_jg428.t1	85.247	Non-Disordered		A0A024GV30	89.2175	Non-Disordered		R4XF03	82.5437	Non-Disordered		UMAG_11927	91.797	Non-Disordered		A0A507CY38	84.5116	#N/A
PBTT_08465	91.7178	Non-Disordered		A0A0H5QXZ2	86.7497	Non-Disordered		poly_jg5232.t1	85.0235	Non-Disordered		A0A024G1T7	89.2042	Non-Disordered		R4XAU4	82.5199	Non-Disordered		UMAG_00102	91.728	Non-Disordered		A0A507BQX8	84.2959	Non-Disordered
PBTT_06086	91.7165	Non-Disordered		A0A0H5R3L3	86.7475	Non-Disordered		poly_jg7965.t1	84.9685	Non-Disordered		A0A024GNS9	89.1768	Non-Disordered		R4X7E7	82.3036	Non-Disordered		UMAG_11187	91.651	Non-Disordered		A0A507CH20	84.2707	Non-Disordered
PBTT_03353	91.6561	Non-Disordered		A0A0H5RE82	86.7448	#N/A		poly_jg7936.t1	84.8651	Non-Disordered		A0A024GCQ4	89.04	Non-Disordered		R4X974	81.8614	Non-Disordered		UMAG_03076	91.634	Non-Disordered		A0A507DJW3	84.2059	Non-Disordered
PBTT_02756	91.6376	Non-Disordered		A0A0H5RWB3	86.7047	Non-Disordered		poly_jg2678.t1	84.455	Non-Disordered		A0A024GNL1	89.0386	Non-Disordered		R4XHW1	81.7597	Non-Disordered		UMAG_10940	91.568	Non-Disordered		A0A507CZW2	84.1671	Non-Disordered
PBTT_08895	91.6007	Non-Disordered		A0A0H5REJ2	86.6112	Non-Disordered		poly_jg2968.t1	84.242	Non-Disordered		A0A024G7F4	88.8668	Non-Disordered		R4XEM1	81.617	Non-Disordered		UMAG_KIS70669.1	91.49	Non-Disordered		A0A507D121	84.145	Non-Disordered
PBTT_04706	91.3888	Non-Disordered		A0A0H5QS82	86.5842	Non-Disordered		poly_jg2715.t1	84.0214	Non-Disordered		A0A024GIZ8	88.824	Non-Disordered		R4XIM9	80.8264	Non-Disordered		UMAG_KIS69929.1	91.489	Non-Disordered		A0A507C545	84.0171	Non-Disordered
PBTT_05916	91.3658	Non-Disordered		A0A0H5RJF9	86.5105	Non-Disordered		poly_jg5180.t1	84.015	Non-Disordered		A0A024G5P0	88.7816	Non-Disordered		R4XE07	80.0413	Non-Disordered		UMAG_12258	91.426	Non-Disordered		A0A507DIM6	83.9817	Non-Disordered
PBTT_00580	91.3532	Non-Disordered		A0A0H5QZT7	86.3583	Non-Disordered		poly_jg9200.t1	83.9187	Non-Disordered		A0A024FZX0	88.4408	Non-Disordered		R4XFN9	79.9382	Non-Disordered		UMAG_10837	91.404	Non-Disordered		A0A507C230	83.9598	#N/A
PBTT_09244	91.3515	Non-Disordered		A0A0H5R9G1	86.2237	Non-Disordered		poly_jg1585.t1	83.8974	Non-Disordered		A0A024G6A7	88.2923	Non-Disordered		R4XF09	79.5701	Non-Disordered		UMAG_01854	91.401	Non-Disordered		A0A507D113	83.7601	Non-Disordered
PBTT_00468	91.2709	Non-Disordered		A0A0H5R090	86.1482	Non-Disordered		poly_jg7641.t1	83.8277	Non-Disordered		A0A024FU41	88.2285	Non-Disordered		R4XKE2	78.8504	Non-Disordered		UMAG_KIS66950.1	91.36	Non-Disordered		A0A507DGP6	83.7565	Non-Disordered
PBTT_09382	91.2263	Non-Disordered		A0A0H5QZT6	86.1001	Non-Disordered		poly_jg2255.t1	83.681	Non-Disordered		A0A024FWS0	87.9742	Non-Disordered		R4XF35	77.8681	Non-Disordered		UMAG_03372	91.36	Non-Disordered		A0A507D6J7	83.7401	Non-Disordered
PBTT_09475	91.2103	Non-Disordered		A0A0H5R0B5	86.0237	Non-Disordered		poly_jg4501.t1	83.4325	Non-Disordered		A0A024FVF8	87.8427	Disordered		R4XAW8	77.3327	Non-Disordered		UMAG_KIS70657.1	91.292	Non-Disordered		A0A507D9I1	83.5415	Non-Disordered
PBTT_06800	91.1501	Non-Disordered		A0A0H5R0B4	85.9852	Non-Disordered		poly_jg2442.t1	83.2969	Non-Disordered		A0A024G6P2	87.7227	Non-Disordered		R4XAE1	77.2826	Non-Disordered		UMAG_KIS72025.1	91.174	Non-Disordered		A0A507DDU3	83.3838	Non-Disordered
PBTT_00936	91.1385	Non-Disordered		A0A0H5R7C6	85.9765	Non-Disordered		poly_jg2082.t1	82.7509	Non-Disordered		A0A024G9N4	87.6169	Non-Disordered		R4XDU4	77.0998	Non-Disordered		UMAG_KIS71254.1	91.086	Non-Disordered		A0A507CRJ3	83.368	Non-Disordered
PBTT_01303	90.9359	Non-Disordered		A0A0H5R9A5	85.682	Non-Disordered		poly_jg1616.t1	82.7188	Non-Disordered		A0A024G0M2	87.5882	Non-Disordered		R4X6J8	77.0184	Non-Disordered		UMAG_01898	90.955	Non-Disordered		A0A507CYX7	83.3489	Non-Disordered
PBTT_04386	90.9048	Non-Disordered		A0A0H5RFG5	85.6713	Non-Disordered		poly_jg402.t1	82.6202	Non-Disordered		A0A024GJQ3	87.5368	Non-Disordered		R4XBT1	76.8818	Non-Disordered		UMAG_10076	90.947	Non-Disordered		A0A507D8Z9	83.3384	Non-Disordered
PBTT_04484	90.8794	Non-Disordered		A0A0H5RB82	85.6605	Non-Disordered		poly_jg8910.t1	82.5312	Non-Disordered		A0A024FUU6	87.5249	Non-Disordered		R4XL88	76.8432	Non-Disordered		UMAG_10055	90.942	Non-Disordered		A0A507D7Q3	83.2457	Non-Disordered
PBTT_07810	90.84	Non-Disordered		A0A0H5RJ72	85.6527	Non-Disordered		poly_jg2650.t1	82.4864	Non-Disordered		A0A024GHK2	87.447	Non-Disordered		R4XG49	76.3783	Non-Disordered		UMAG_00688	90.935	Non-Disordered		A0A507CW33	83.1742	Non-Disordered
PBTT_10275	90.8231	Non-Disordered		A0A0H5QNG7	85.5354	Non-Disordered		poly_jg983.t1	82.3557	Non-Disordered		A0A024G6Q7	87.3814	Non-Disordered		R4XAU9	76.1576	Non-Disordered		UMAG_KIS72287.1	90.925	Non-Disordered		A0A507D7G1	83.0996	Non-Disordered
PBTT_08855	90.7172	Non-Disordered		A0A0H5QL83	85.5041	Non-Disordered		poly_jg494.t1	82.2524	Non-Disordered		A0A024G830	87.1405	Non-Disordered		R4XF19	76.1406	Non-Disordered		UMAG_10301	90.846	Non-Disordered		A0A507D9G6	83.0465	Non-Disordered
PBTT_02565	90.6601	Non-Disordered		A0A0H5QVC4	85.5028	Non-Disordered		poly_jg9701.t1	82.187	Non-Disordered		A0A024GM25	87.1263	Non-Disordered		R4XBP9	75.1804	Non-Disordered		UMAG_01428	90.806	Non-Disordered		A0A507D3K4	83.0327	Non-Disordered
PBTT_01874	90.6017	Non-Disordered		A0A0H5R117	85.4528	Non-Disordered		poly_jg3144.t1	82.1131	Non-Disordered		A0A024GM31	87.1154	Non-Disordered		R4XNL8	74.1492	Non-Disordered		UMAG_03615	90.609	Non-Disordered		A0A507DJK9	82.9809	Non-Disordered
PBTT_02541	90.5789	Non-Disordered		A0A0H5R421	85.2706	#N/A		poly_jg996.t1	81.98	Non-Disordered		A0A024FV48	87.0278	Non-Disordered		R4X9D0	73.9983	Non-Disordered		UMAG_02111	90.513	Non-Disordered		A0A507DFT1	82.8917	Non-Disordered
PBTT_02552	90.5601	Non-Disordered		A0A0H5R0E8	85.0914	Non-Disordered		poly_jg2649.t1	81.6752	Non-Disordered		A0A024G979	87.0184	Non-Disordered		R4XDI0	73.8719	Non-Disordered		UMAG_01301	90.45	Non-Disordered		A0A507D1J9	82.8886	Non-Disordered
PBTT_06706	90.5173	Non-Disordered		A0A0H5R1T3	84.8185	Non-Disordered		poly_jg5396.t1	81.2111	Non-Disordered		A0A024G6F5	86.9868	Non-Disordered		R4XGZ2	73.6757	Non-Disordered		UMAG_04533	90.416	Non-Disordered		A0A507CQ23	82.8875	Non-Disordered
PBTT_10363	90.5089	Non-Disordered		A0A0H5R4H2	84.6018	Non-Disordered		poly_jg2464.t1	80.8292	Non-Disordered		A0A024GPF8	86.8265	Non-Disordered		R4XFZ1	73.6342	Non-Disordered		UMAG_03112	90.368	Non-Disordered		A0A507D084	82.8831	Non-Disordered
PBTT_08076	90.3956	Non-Disordered		A0A0H5QUW1	84.2288	Non-Disordered		poly_jg8881.t1	80.6898	Non-Disordered		A0A024GTA6	86.7968	Non-Disordered		R4XJR5	73.0966	Non-Disordered		UMAG_00182	90.354	Non-Disordered		A0A507CHN9	82.7903	Non-Disordered
PBTT_10515	90.3523	Non-Disordered		A0A0H5QNA9	84.205	Non-Disordered		poly_jg406.t1	80.576	Non-Disordered		A0A024GN70	86.7731	Non-Disordered		R4XLX5	72.8262	Non-Disordered		UMAG_02231	90.347	Non-Disordered		A0A507D2Y4	82.6326	Non-Disordered
PBTT_02652	90.3078	Non-Disordered		A0A0H5RF36	83.9936	Non-Disordered		poly_jg6226.t1	80.3729	Non-Disordered		A0A024GJP0	86.6228	Non-Disordered		R4X7E2	71.4688	Non-Disordered		UMAG_02538	90.306	Non-Disordered		A0A507CBB4	82.6018	Non-Disordered
PBTT_00952	90.3069	Non-Disordered		A0A0H5QXY3	83.993	Non-Disordered		poly_jg5417.t1	80.3626	Non-Disordered		A0A024G6B3	86.6094	Non-Disordered		R4XD22	71.139	Non-Disordered		UMAG_05227	90.142	Non-Disordered		A0A507CZ21	82.4936	Non-Disordered
PBTT_01911	90.2585	Non-Disordered		A0A0H5QZL8	83.9856	Non-Disordered		poly_jg1324.t1	80.2581	Non-Disordered		A0A024GBL4	86.6085	Non-Disordered		R4X6E7	70.9548	Non-Disordered		UMAG_06118	90.096	Non-Disordered		A0A507C626	82.3366	Non-Disordered
PBTT_09243	90.2575	Non-Disordered		A0A0H5R0Z8	83.9723	Non-Disordered		poly_jg4681.t1	80.2306	Non-Disordered		A0A024GH58	86.4976	Non-Disordered		R4XK37	70.8701	Non-Disordered		UMAG_KIS68649.1	90.066	Non-Disordered		A0A507CSI1	82.3299	Non-Disordered
PBTT_06450	90.1825	Non-Disordered		A0A0H5R836	83.8147	Non-Disordered		poly_jg8338.t1	80.1739	Non-Disordered		A0A024GMM0	86.4709	Non-Disordered		R4XE34	69.733	Non-Disordered		UMAG_05803	90.066	Non-Disordered		A0A507C051	82.1525	Non-Disordered
PBTT_05128	90.1723	Non-Disordered		A0A0H5R0B0	83.6915	Non-Disordered		poly_jg6138.t1	79.9606	Non-Disordered		A0A024GKN4	86.4297	Non-Disordered		R4XLD1	69.3295	Non-Disordered		UMAG_01300	90.061	Non-Disordered		A0A507DID5	81.8736	Non-Disordered
PBTT_03736	90.1295	Non-Disordered		A0A0H5RGM5	83.6584	Non-Disordered		poly_jg1817.t1	79.7302	Non-Disordered		A0A024G3V0	86.2706	Non-Disordered		R4X877	68.3608	Non-Disordered		UMAG_04696	89.99	Non-Disordered		A0A507CZC2	81.7706	Non-Disordered
PBTT_09182	90.0115	Non-Disordered		A0A0H5QHT1	83.6357	Non-Disordered		poly_jg7768.t1	79.6024	Non-Disordered		A0A024GTY2	86.162	Non-Disordered		R4XGK3	67.1186	Non-Disordered		UMAG_04247	89.954	Non-Disordered		A0A507CNK1	81.4118	Non-Disordered
PBTT_01226	89.9994	Non-Disordered		A0A0H5RDC1	83.5634	Non-Disordered		poly_jg2069.t1	79.6021	Disordered		A0A024FWB9	86.0615	Non-Disordered		R4X9L3	66.8606	Disordered		UMAG_KIS70794.1	89.905	Non-Disordered		A0A507CS96	81.2665	Non-Disordered
PBTT_06636	89.8932	Non-Disordered		A0A0H5RVY2	83.5578	#N/A		poly_jg5464.t1	79.4794	Non-Disordered		A0A024GLU4	85.9745	Non-Disordered		R4XDN0	66.3346	Non-Disordered		UMAG_02134	89.904	Non-Disordered		A0A507DJ86	81.2299	Non-Disordered
PBTT_06399	89.7412	Non-Disordered		A0A0H5QL21	83.1711	Non-Disordered		poly_jg2802.t1	79.4442	Disordered		A0A024FUV6	85.8156	Non-Disordered		R4XGB7	66.1359	Disordered		UMAG_05310	89.885	Non-Disordered		A0A507C5Y6	81.1329	Non-Disordered
PBTT_06152	89.6228	Non-Disordered		A0A0H5RG67	83.1555	Non-Disordered		poly_jg3048.t1	79.1541	Non-Disordered		A0A024GTV9	85.7237	Non-Disordered		R4XC44	65.7836	Non-Disordered		UMAG_03975	89.703	Non-Disordered		A0A507CWN6	80.7775	Non-Disordered
PBTT_10327	89.5859	Non-Disordered		A0A0H5QQZ5	83.0954	Non-Disordered		poly_jg5081.t1	79.1395	Non-Disordered		A0A024GKQ3	85.4556	Non-Disordered		R4XD56	64.5811	Non-Disordered		UMAG_02119	89.569	Non-Disordered		A0A507CUC4	80.6522	Non-Disordered
PBTT_04808	89.572	Non-Disordered		A0A0H5R3M3	82.6503	Non-Disordered		poly_jg3193.t1	79.0729	Non-Disordered		A0A024GLU1	85.3816	Non-Disordered		R4XG85	63.5184	Non-Disordered		UMAG_KIS70636.1	89.491	Non-Disordered		A0A507CTH5	80.5332	Non-Disordered
PBTT_10306	89.5594	Non-Disordered		A0A0H5QPE3	82.5121	Non-Disordered		poly_jg2050.t1	78.8379	Non-Disordered		A0A024GMW9	85.0779	Non-Disordered		R4XES0	63.4045	Non-Disordered		UMAG_11554	89.42	Non-Disordered		A0A507C4L1	80.4594	Non-Disordered
PBTT_04891	89.5298	Non-Disordered		A0A0H5QH04	82.4966	Non-Disordered		poly_jg1204.t1	78.7703	Non-Disordered		A0A024FSU1	85.0693	Non-Disordered		R4XDG7	63.1363	Non-Disordered		UMAG_00822	89.41	Non-Disordered		A0A507D092	80.4562	Non-Disordered
PBTT_01609	89.5247	Non-Disordered		A0A0H5R3Z3	82.454	Non-Disordered		poly_jg8773.t1	78.614	Non-Disordered		A0A024GPZ9	85.0181	Non-Disordered		R4XER7	62.7671	Non-Disordered		UMAG_04171	89.365	Non-Disordered		A0A507CLM2	80.2799	Non-Disordered
PBTT_00776	89.4705	Non-Disordered		A0A0H5R3X7	82.4441	Non-Disordered		poly_jg773.t1	78.3258	Non-Disordered		A0A024FTQ3	84.8996	Non-Disordered		R4XG76	62.4286	Non-Disordered		UMAG_01957	89.356	Non-Disordered		A0A507C8D8	80.2507	Non-Disordered
PBTT_03553	89.414	Non-Disordered		A0A0H5QI48	82.3293	Non-Disordered		poly_jg6009.t1	78.2327	Non-Disordered		A0A024FT59	84.8725	Non-Disordered		R4X7Y6	62.4286	Disordered		UMAG_00302	89.1	Non-Disordered		A0A507CQP9	80.1159	Non-Disordered
PBTT_06469	89.3907	Non-Disordered		A0A0H5R6K5	82.2962	Non-Disordered		poly_jg9887.t1	78.2186	Non-Disordered		A0A024GIH4	84.7754	Non-Disordered		R4X9N9	62.0173	Non-Disordered		UMAG_KIS70733.1	89.083	Non-Disordered		A0A507D7A5	80.0406	Disordered
PBTT_04327	89.3592	Non-Disordered		A0A0H5QX89	82.2497	Non-Disordered		poly_jg7637.t1	78.0156	Non-Disordered		A0A024GRR6	84.6646	Non-Disordered		R4X7D7	61.9674	Non-Disordered		UMAG_00027	89.033	Non-Disordered		A0A507C8H7	80.0034	Non-Disordered
PBTT_10164	89.324	Non-Disordered		A0A0H5QYC4	82.0892	Non-Disordered		poly_jg5091.t1	78.0031	Non-Disordered		A0A024GTC2	84.5879	Non-Disordered		R4XJ53	61.7097	Non-Disordered		UMAG_02212	89.012	Non-Disordered		A0A507DLS3	79.7673	Non-Disordered
PBTT_08731	89.3208	Non-Disordered		A0A0H5RS28	82.0369	Non-Disordered		poly_jg6677.t1	77.9325	Non-Disordered		A0A024GCI4	84.1619	Non-Disordered		R4XHV0	61.3642	Disordered		UMAG_05097	89.009	Non-Disordered		A0A507CJW0	79.6236	Non-Disordered
PBTT_02054	89.2943	Non-Disordered		A0A0H5QN61	81.7343	Non-Disordered		poly_jg5883.t1	77.8647	Non-Disordered		A0A024GGI9	84.0476	Non-Disordered		R4X6Q4	60.4994	Non-Disordered		UMAG_11083	88.985	Non-Disordered		A0A507D918	79.5534	Non-Disordered
PBTT_09222	89.2689	Non-Disordered		A0A0H5R1Q4	81.6294	Non-Disordered		poly_jg7781.t1	77.7516	Non-Disordered		A0A024FZ14	84.0443	Non-Disordered		R4XFP5	60.3524	Non-Disordered		UMAG_10418	88.944	Non-Disordered		A0A507CQ51	79.4631	Non-Disordered
PBTT_07144	89.1307	Non-Disordered		A0A0H5R7J0	81.6152	Non-Disordered		poly_jg8135.t1	77.5975	Non-Disordered		A0A024G7C8	83.942	Non-Disordered		R4X9M5	60.2057	Non-Disordered		UMAG_10091	88.931	Non-Disordered		A0A507D044	79.4323	Non-Disordered
PBTT_09143	89.0645	Non-Disordered		A0A0H5QYD2	81.5244	Non-Disordered		poly_jg7727.t1	77.586	Non-Disordered		A0A024GPM3	83.8216	Non-Disordered		S0BEE0	60.0372	Non-Disordered		UMAG_10536	88.838	Non-Disordered		A0A507DIM4	79.39	Non-Disordered
PBTT_05610	89.0604	Non-Disordered		A0A0H5QND1	81.5102	Non-Disordered		poly_jg1497.t1	77.4973	Non-Disordered		A0A024G545	83.76	Non-Disordered		R4XGQ1	59.0692	Non-Disordered		UMAG_03232	88.757	Non-Disordered		A0A507DCC4	79.2683	Non-Disordered
PBTT_03522	89.052	Non-Disordered		A0A0H5R6Z8	81.433	Non-Disordered		poly_jg4434.t1	77.4161	Non-Disordered		A0A024GIA8	83.4527	Non-Disordered		R4XNS9	58.1452	Disordered		UMAG_03689	88.661	Non-Disordered		A0A507C006	79.2212	Non-Disordered
PBTT_07487	88.9201	Non-Disordered		A0A0H5QHZ4	81.1955	Non-Disordered		poly_jg2965.t1	77.3725	Non-Disordered		A0A024G674	83.3001	Non-Disordered		R4XE89	56.7218	Non-Disordered		UMAG_05072	88.638	Non-Disordered		A0A507CKI2	79.1548	Non-Disordered
PBTT_05698	88.8873	Non-Disordered		A0A0H5R7P7	81.1554	Non-Disordered		poly_jg5522.t1	77.2681	Non-Disordered		A0A024G4K8	83.2459	Non-Disordered		R4XKG1	56.4574	Non-Disordered		UMAG_06075	88.596	Non-Disordered		A0A507DD70	79.021	Non-Disordered
PBTT_09590	88.8837	Non-Disordered		A0A0H5QXG6	81.1174	Non-Disordered		poly_jg410.t1	77.2054	Non-Disordered		A0A024G183	83.2282	Non-Disordered		R4XF90	56.1689	Disordered		UMAG_00598	88.562	Non-Disordered		A0A507DFD9	78.902	Non-Disordered
PBTT_09893	88.8564	Non-Disordered		A0A0H5QF72	81.1129	Disordered		poly_jg2092.t1	77.1822	Non-Disordered		A0A024G0B4	82.8761	Non-Disordered		R4XG22	55.8595	Non-Disordered		UMAG_10746	88.543	Non-Disordered		A0A507BRH6	78.8534	Non-Disordered
PBTT_00649	88.7945	Non-Disordered		A0A0H5R0T8	81.0466	Non-Disordered		poly_jg2837.t1	77.1221	Non-Disordered		A0A024FUD4	82.7435	Non-Disordered		R4XDC3	55.3153	Disordered		UMAG_01130	88.5	Non-Disordered		A0A507DG15	78.6051	Non-Disordered
PBTT_08053	88.5182	Non-Disordered		A0A0H5R7F4	81.0406	Non-Disordered		poly_jg6047.t1	77.0664	Non-Disordered		A0A024GLG9	82.6223	Non-Disordered		R4XDQ8	54.7239	Non-Disordered		UMAG_12123	88.487	Non-Disordered		A0A507D2U6	78.5753	Non-Disordered
PBTT_06479	88.5055	Non-Disordered		A0A0H5QW20	81.0074	Non-Disordered		poly_jg1317.t1	76.883	Non-Disordered		A0A024GDW1	82.4811	Non-Disordered		R4X884	54.3679	Non-Disordered		UMAG_10068	88.371	Non-Disordered		A0A507CNX1	78.4968	Non-Disordered
PBTT_01696	88.4934	Non-Disordered		A0A0H5QGD8	81.0052	Non-Disordered		poly_jg8535.t1	76.5358	Non-Disordered		A0A024GPF4	82.456	Non-Disordered		R4X7G8	54.3296	Disordered		UMAG_12175	88.348	Non-Disordered		A0A507CRQ6	78.4525	Non-Disordered
PBTT_09142	88.4072	Non-Disordered		A0A0H5R3V9	80.9839	Non-Disordered		poly_jg2410.t1	76.5222	Non-Disordered		A0A024G7B0	82.4427	Non-Disordered		R4X9L9	54.2106	Non-Disordered		UMAG_KIS68413.1	88.334	Non-Disordered		A0A507D622	78.4377	Non-Disordered
PBTT_08448	88.2144	Non-Disordered		A0A0H5QS96	80.9836	Non-Disordered		poly_jg8126.t1	76.516	Non-Disordered		A0A024GQU3	82.4279	Non-Disordered		R4XFP3	52.6766	Non-Disordered		UMAG_KIS72219.1	88.332	Non-Disordered		A0A507C3I7	78.4201	Non-Disordered
PBTT_09242	88.1707	Non-Disordered		A0A0H5R2W6	80.9619	Non-Disordered		poly_jg4580.t1	76.3306	Non-Disordered		A0A024GEB5	82.411	Non-Disordered		R4X837	52.6317	Non-Disordered		UMAG_00064	88.273	Non-Disordered		A0A507CKR0	78.3825	Non-Disordered
PBTT_06110	88.1414	Non-Disordered		A0A0H5QJF6	80.9047	Non-Disordered		poly_jg9389.t1	76.2881	Non-Disordered		A0A024GK86	82.3728	Non-Disordered		R4X8E6	52.5207	Non-Disordered		UMAG_01640	88.231	Non-Disordered		A0A507BXQ4	78.2894	Non-Disordered
PBTT_09457	88.0311	Non-Disordered		A0A0H5REQ6	80.8863	Non-Disordered		poly_jg2664.t1	76.208	Non-Disordered		A0A024FX65	82.372	Non-Disordered		R4XB56	51.7052	Non-Disordered		UMAG_02229	88.213	Non-Disordered		A0A507CWG1	78.27	Non-Disordered
PBTT_05779	87.7094	Non-Disordered		A0A0H5R3U9	80.6262	Non-Disordered		poly_jg2899.t1	76.0912	Non-Disordered		A0A024GEW8	82.3398	Non-Disordered		R4XH31	51.3922	Non-Disordered		UMAG_01302	88.202	Non-Disordered		A0A507CGZ3	78.115	Non-Disordered
PBTT_04790	87.6103	Non-Disordered		A0A0H5QZL6	80.477	Non-Disordered		poly_jg2744.t1	76.0858	Non-Disordered		A0A024FX48	82.2891	Non-Disordered		R4XB32	50.0408	Non-Disordered		UMAG_11415	88.188	Non-Disordered		A0A507CH22	78.1135	Non-Disordered
PBTT_01985	87.4408	Non-Disordered		A0A0H5RBY0	80.3801	Non-Disordered		poly_jg5866.t1	75.9942	Non-Disordered		A0A024GQA3	82.1319	Non-Disordered		R4XB64	49.9402	Non-Disordered		UMAG_04145	88.047	Non-Disordered		A0A507DB72	78.0185	Non-Disordered
PBTT_09118	87.3733	Non-Disordered		A0A0H5R1S8	80.2546	Non-Disordered		poly_jg9729.t1	75.9741	Non-Disordered		A0A024FY07	82.105	Non-Disordered		R4XH40	49.8247	Non-Disordered		UMAG_10186	88.039	Non-Disordered		A0A507CZI6	77.9897	Non-Disordered
PBTT_03882	87.2735	Non-Disordered		A0A0H5R4V6	80.1048	Non-Disordered		poly_jg8991.t1	75.8048	Non-Disordered		A0A024FTU5	82.0735	Non-Disordered		R4XGP2	48.9809	Disordered		UMAG_05550	88.039	Non-Disordered		A0A507D0R3	77.966	Non-Disordered
PBTT_07449	87.2734	Non-Disordered		A0A0H5RCC9	80.0042	Non-Disordered		poly_jg1088.t1	75.7731	Non-Disordered		A0A024FV15	82.0282	Non-Disordered		R4XMW3	48.8822	Disordered		UMAG_02473	87.975	Non-Disordered		A0A507CMJ9	77.8676	Non-Disordered
PBTT_05360	87.27	Non-Disordered		A0A0H5RUG6	79.9388	Non-Disordered		poly_jg967.t1	75.7484	Non-Disordered		A0A024G461	82.0195	Non-Disordered		R4XFF7	48.7152	Non-Disordered		UMAG_05318	87.887	Non-Disordered		A0A507CUV5	77.7517	Non-Disordered
PBTT_07479	87.2053	Non-Disordered		A0A0H5R1K9	79.8567	Non-Disordered		poly_jg8212.t1	75.6605	Non-Disordered		A0A024G5J5	82.0009	Disordered		R4XLD2	48.0963	Non-Disordered		UMAG_04740	87.764	Non-Disordered		A0A507CZP8	77.5303	Non-Disordered
PBTT_04511	87.1865	Non-Disordered		A0A0H5QUF5	79.8244	Non-Disordered		poly_jg2187.t2	75.5595	Non-Disordered		A0A024FX41	81.7624	Non-Disordered		R4XP96	47.8789	Disordered		UMAG_KIS69172.1	87.746	Non-Disordered		A0A507CMG5	77.4806	Non-Disordered
PBTT_06659	87.1569	Non-Disordered		A0A0H5RTF1	79.7769	Non-Disordered		poly_jg651.t1	75.4576	Non-Disordered		A0A024FTM3	81.3189	Non-Disordered		R4XNU9	47.791	Non-Disordered		UMAG_02006	87.712	Non-Disordered		A0A507CRG5	77.4334	Non-Disordered
PBTT_04144	87.1382	Non-Disordered		A0A0H5QPI7	79.7294	Non-Disordered		poly_jg7663.t2	75.3773	Non-Disordered		A0A024GDA0	81.3157	Non-Disordered		R4XPI0	47.4933	Non-Disordered		UMAG_05290	87.698	Non-Disordered		A0A507DIX9	77.4028	Non-Disordered
PBTT_10076	87.1067	Non-Disordered		A0A0H5QSW6	79.6733	Non-Disordered		poly_jg2318.t1	75.2798	Non-Disordered		A0A024GUG6	81.2599	Non-Disordered		R4X888	47.0976	Disordered		UMAG_06071	87.691	Non-Disordered		A0A507CR44	77.3074	Non-Disordered
PBTT_01877	87.1022	Non-Disordered		A0A0H5QK77	79.6383	Non-Disordered		poly_jg9438.t1	74.9703	Non-Disordered		A0A024FVV5	81.1123	Non-Disordered		R4XG64	46.8688	Non-Disordered		UMAG_10493	87.648	Non-Disordered		A0A507DBT9	77.2752	Non-Disordered
PBTT_02466	87.0556	Non-Disordered		A0A0H5R4B0	79.4543	Non-Disordered		poly_jg7770.t1	74.8879	Disordered		A0A024GTN2	80.9357	#N/A		R4XJH7	45.3198	Non-Disordered		UMAG_02758	87.614	Non-Disordered		A0A507D4L1	77.1122	Non-Disordered
PBTT_08744	87.0092	Non-Disordered		A0A0H5QTE7	79.3436	Non-Disordered		poly_jg4363.t1	74.6022	Disordered		A0A024FSY0	80.9075	Non-Disordered		R4XDV9	45.16	Disordered		UMAG_10587	87.603	Non-Disordered		A0A507D2G7	76.9004	Non-Disordered
PBTT_08669	86.9971	Non-Disordered		A0A0H5QGG1	79.1344	Non-Disordered		poly_jg3141.t1	74.4327	Non-Disordered		A0A024FU58	80.8708	Non-Disordered		R4XBG7	44.0253	Non-Disordered		UMAG_KIS67612.1	87.565	Non-Disordered		A0A507CTB0	76.4054	Non-Disordered
PBTT_05328	86.973	Non-Disordered		A0A0H5RED1	78.819	Non-Disordered		poly_jg7215.t1	74.37	Non-Disordered		A0A024FX29	80.8124	Non-Disordered		R4XBZ3	43.3676	Non-Disordered		UMAG_KIS71125.1	87.535	Non-Disordered		A0A507D8W7	76.3524	Non-Disordered
PBTT_03585	86.897	Non-Disordered		A0A0H5R2Q4	78.7746	Non-Disordered		poly_jg7663.t1	74.3458	Non-Disordered		A0A024G3Y6	80.7195	Non-Disordered		R4XFW9	42.6788	Non-Disordered		UMAG_03753	87.083	Non-Disordered		A0A507D3F2	76.3464	Non-Disordered
PBTT_07313	86.7773	Non-Disordered		A0A0H5QGC8	78.6313	Non-Disordered		poly_jg1419.t1	73.9947	Non-Disordered		A0A024G4N0	80.563	Non-Disordered		R4X767	41.1428	Non-Disordered		UMAG_11739	87.044	Non-Disordered		A0A507CMC7	76.3242	Non-Disordered
PBTT_10517	86.7071	Non-Disordered		A0A0H5QG54	78.5656	Non-Disordered		poly_jg5918.t1	73.8903	Non-Disordered		A0A024GJE0	80.5366	Non-Disordered		R4X9Q8	41.1062	Disordered		UMAG_12316	86.921	Non-Disordered		A0A507CS05	76.2515	Non-Disordered
PBTT_07752	86.6749	Non-Disordered		A0A0H5QLU7	78.3992	Non-Disordered		poly_jg2638.t1	73.7029	Non-Disordered		A0A024GTB8	80.5065	Non-Disordered		R4XDH7	40.6832	Non-Disordered		UMAG_05314	86.837	Non-Disordered		A0A507C8U9	76.2384	Non-Disordered
PBTT_08342	86.6618	Non-Disordered		A0A0H5QV93	78.3727	Non-Disordered		poly_jg7930.t1	73.6568	Non-Disordered		A0A024FTA7	80.4636	Non-Disordered		R4XB99	39.6974	Non-Disordered		UMAG_02813	86.821	Non-Disordered		A0A507D049	76.2328	Non-Disordered
PBTT_08693	86.6535	Non-Disordered		A0A0H5R4C9	78.2571	#N/A		poly_jg5377.t1	73.6205	Non-Disordered		A0A024GHX2	80.4251	Non-Disordered		R4XAP8	38.6812	Non-Disordered		UMAG_05309	86.798	Non-Disordered		A0A507D2R0	76.1984	Non-Disordered
PBTT_01543	86.6107	Non-Disordered		A0A0H5RD16	78.2423	Non-Disordered		poly_jg3511.t1	73.6155	Non-Disordered		A0A024GEA9	80.2738	Non-Disordered		R4XKG6	36.4276	Non-Disordered		UMAG_KIS66277.1	86.796	Non-Disordered		A0A507CS21	76.1718	Disordered
PBTT_09765	86.5817	Non-Disordered		A0A0H5QUY9	78.2407	Disordered		poly_jg8605.t1	73.5808	Non-Disordered		A0A024GL77	80.1383	Non-Disordered		R4XDT3	36.3778	Non-Disordered		UMAG_00280	86.668	Non-Disordered		A0A507C7B3	75.9261	Non-Disordered
PBTT_09470	86.4374	Non-Disordered		A0A0H5RLN6	78.2015	Non-Disordered		poly_jg354.t1	73.5493	Non-Disordered		A0A024GT51	80.1246	Non-Disordered		R4XDA2	36.3725	Non-Disordered		UMAG_02465	86.621	Non-Disordered		A0A507CTX2	75.8641	Non-Disordered
PBTT_02848	86.4333	Non-Disordered		A0A0H5QWJ7	78.0379	Non-Disordered		poly_jg3240.t1	73.5185	Non-Disordered		A0A024FUJ8	80.1137	Non-Disordered		R4XBA6	35.8376	Non-Disordered		UMAG_01298	86.555	Non-Disordered		A0A507D076	75.7643	Non-Disordered
PBTT_02532	86.3496	Non-Disordered		A0A0H5QVM4	77.978	Non-Disordered		poly_jg7929.t1	73.441	Non-Disordered		A0A024G9F1	80.0822	Non-Disordered		R4X6L8	35.5398	Non-Disordered		UMAG_03202	86.525	Non-Disordered		A0A507D372	75.6626	Non-Disordered
PBTT_04023	86.3336	Non-Disordered		A0A0H5QF24	77.6379	Non-Disordered		poly_jg338.t1	73.2379	Disordered		A0A024GS19	80.0347	Non-Disordered		R4XEK5	34.9522	Non-Disordered		UMAG_12257	86.491	Non-Disordered		A0A507CYX1	75.6602	Non-Disordered
PBTT_09173	86.2808	Non-Disordered		A0A0H5RCB4	77.4958	Non-Disordered		poly_jg2176.t1	73.2348	Non-Disordered		A0A024GGR6	79.9861	Non-Disordered		R4XPL5	34.1113	Non-Disordered		UMAG_05633	86.474	Non-Disordered		A0A507CKN9	75.5719	Non-Disordered
PBTT_02956	86.1956	Non-Disordered		A0A0H5RC46	77.3985	Non-Disordered		poly_jg4317.t1	73.1891	Non-Disordered		A0A024GKG6	79.8973	Non-Disordered		R4X9S3	33.8405	Non-Disordered		UMAG_03880	86.454	Non-Disordered		A0A507DBB9	75.3655	Non-Disordered
PBTT_03552	86.1907	Non-Disordered		A0A0H5QLV4	77.2049	Non-Disordered		poly_jg5340.t1	73.1521	Non-Disordered		A0A024GKL2	79.8194	Non-Disordered		R4XKB0	32.4856	Non-Disordered		UMAG_01772	86.438	Non-Disordered		A0A507C501	75.3523	Non-Disordered
PBTT_07772	86.1736	Non-Disordered		A0A0H5R7U6	76.9891	Non-Disordered		poly_jg7883.t1	72.8514	Disordered		A0A024G7P2	79.7903	Non-Disordered		R4XGG4	31.7882	Non-Disordered		UMAG_05931	86.428	Non-Disordered		A0A507C920	75.3114	Non-Disordered
PBTT_03131	85.969	Non-Disordered		A0A0H5QJ36	76.9553	Non-Disordered		poly_jg9606.t1	72.8379	Non-Disordered		A0A024GLW8	79.7642	Non-Disordered		R4X8H0	30.4075	Non-Disordered		UMAG_10975	86.38	Non-Disordered		A0A507DGJ9	75.2907	Non-Disordered
PBTT_09412	85.954	Non-Disordered		A0A0H5R9B5	76.8336	Non-Disordered		poly_jg5649.t1	72.8281	Non-Disordered		A0A024GRE2	79.6463	#N/A		R4XJX5	29.8873	Non-Disordered		UMAG_03748	86.245	Non-Disordered		A0A507CXA0	75.2589	Non-Disordered
PBTT_09686	85.8691	Non-Disordered		A0A0H5RBS7	76.7869	Non-Disordered		poly_jg1628.t1	72.7433	Non-Disordered		A0A024GI54	79.55	Non-Disordered		R4X7Q2	29.7874	Non-Disordered		UMAG_00558	86.195	Non-Disordered		A0A507DER7	75.241	Non-Disordered
PBTT_07813	85.8251	Non-Disordered		A0A0H5RU20	76.7404	Disordered		poly_jg6699.t1	72.6042	Non-Disordered		A0A024GQX3	79.511	Non-Disordered		R4XAT1	29.201	Non-Disordered		UMAG_05548	86.19	Non-Disordered		A0A507CLS2	75.1583	Non-Disordered
PBTT_04119	85.778	Non-Disordered		A0A0H5R5Q7	76.5286	Non-Disordered		poly_jg876.t1	72.4901	Non-Disordered		A0A024GIV5	79.2774	Non-Disordered		R4X7M7	28.2537	Non-Disordered		UMAG_01750	86.121	Non-Disordered		A0A507C6G2	75.1398	Non-Disordered
PBTT_01697	85.7729	Non-Disordered		A0A0H5QHA3	76.5087	Non-Disordered		poly_jg1885.t1	72.0739	Non-Disordered		A0A024GT86	79.2427	Non-Disordered		R4XJU8	27.9771	Non-Disordered		UMAG_01886	86.113	Non-Disordered		A0A507CYT4	75.0313	Non-Disordered
PBTT_09490	85.7132	Non-Disordered		A0A0H5R9L7	76.4709	Non-Disordered		poly_jg3910.t1	71.8615	Non-Disordered		A0A024FUK0	79.2264	Non-Disordered						UMAG_05319	86.101	Non-Disordered		A0A507BIZ2	74.9868	Non-Disordered
PBTT_04956	85.6391	Non-Disordered		A0A0H5RTF5	76.3707	#N/A		poly_jg1948.t1	71.8144	Non-Disordered		A0A024FV66	79.0784	Non-Disordered						UMAG_10557	86.083	Non-Disordered		A0A507CT30	74.8745	Non-Disordered
PBTT_02914	85.6104	Non-Disordered		A0A0H5RBU3	76.3547	Non-Disordered		poly_jg7880.t1	71.2523	Non-Disordered		A0A024FV86	78.9766	Non-Disordered						UMAG_KIS67261.1	86.04	Non-Disordered		A0A507CI32	74.8665	Non-Disordered
PBTT_06162	85.5936	Non-Disordered		A0A0H5QHR0	76.2856	Non-Disordered		poly_jg2440.t1	71.0633	Non-Disordered		A0A024G0X1	78.9049	Non-Disordered						UMAG_01858	85.919	Non-Disordered		A0A507CJZ9	74.8147	Non-Disordered
PBTT_06480	85.5584	Non-Disordered		A0A0H5QHC6	76.164	Non-Disordered		poly_jg5485.t1	71.0439	Non-Disordered		A0A024FTY0	78.8917	Non-Disordered						UMAG_05539	85.912	Non-Disordered		A0A507DG71	74.8025	Non-Disordered
PBTT_02208	85.4254	Non-Disordered		A0A0H5QKF0	76.1134	Non-Disordered		poly_jg9759.t1	70.6754	Non-Disordered		A0A024GTR5	78.8488	Non-Disordered						UMAG_05995	85.804	Non-Disordered		A0A507D5Q1	74.7977	Non-Disordered
PBTT_01699	85.4238	Non-Disordered		A0A0H5QKE8	75.8279	Non-Disordered		poly_jg5382.t1	70.5934	Non-Disordered		A0A024GHV8	78.6947	Non-Disordered						UMAG_01786	85.797	Non-Disordered		A0A507CKD3	74.7233	Non-Disordered
PBTT_07201	85.3966	Non-Disordered		A0A0H5QL55	75.7958	Non-Disordered		poly_jg1631.t1	70.3303	Non-Disordered		A0A024FUM9	78.5086	Non-Disordered						UMAG_06119	85.658	Non-Disordered		A0A507D088	74.6665	Disordered
PBTT_02904	85.3911	Non-Disordered		A0A0H5QX85	75.7541	Non-Disordered		poly_jg10159.t1	70.2503	Non-Disordered		A0A024GIA7	78.4613	Non-Disordered						UMAG_11111	85.63	Non-Disordered		A0A507CNV7	74.6464	Non-Disordered
PBTT_10178	85.3851	Non-Disordered		A0A0H5RCH5	75.5165	Non-Disordered		poly_jg5096.t1	69.9979	Disordered		A0A024GVA3	78.4457	Non-Disordered						UMAG_11540	85.613	Non-Disordered		A0A507DD61	74.5352	Non-Disordered
PBTT_03252	85.382	Non-Disordered		A0A0H5R6L5	75.4751	Non-Disordered		poly_jg9742.t1	69.9673	Non-Disordered		A0A024FXU1	78.2431	Non-Disordered						UMAG_05907	85.512	Non-Disordered		A0A507CY60	74.533	Non-Disordered
PBTT_08676	85.3713	Non-Disordered		A0A0H5QKC7	75.4592	Non-Disordered		poly_jg2645.t1	69.9446	Non-Disordered		A0A024FZY8	78.1464	Non-Disordered						UMAG_04641	85.484	Non-Disordered		A0A507CQR9	74.5021	Non-Disordered
PBTT_08372	85.3007	Non-Disordered		A0A0H5RBX9	75.2124	Non-Disordered		poly_jg386.t1	69.9281	Non-Disordered		A0A024G1H1	78.1151	Non-Disordered						UMAG_04496	85.465	Non-Disordered		A0A507D3C5	74.4862	Non-Disordered
PBTT_03452	85.2366	Non-Disordered		A0A0H5QMT8	75.1488	Non-Disordered		poly_jg7454.t1	69.9265	Non-Disordered		A0A024FTM2	77.859	Non-Disordered						UMAG_05366	85.444	Non-Disordered		A0A507C2D3	74.4737	Non-Disordered
PBTT_10201	84.991	Non-Disordered		A0A0H5QGH7	75.0911	Non-Disordered		poly_jg5535.t1	69.6244	Non-Disordered		A0A024G828	77.8304	Non-Disordered						UMAG_KIS67301.1	85.38	Non-Disordered		A0A507CJ21	74.4206	Non-Disordered
PBTT_02041	84.9847	Non-Disordered		A0A0H5R3H4	74.7968	Non-Disordered		poly_jg6915.t1	69.3955	Non-Disordered		A0A024GLJ7	77.3468	Disordered						UMAG_04259	85.356	Non-Disordered		A0A507BZY6	74.4069	Non-Disordered
PBTT_07426	84.9795	Non-Disordered		A0A0H5QPH5	74.7139	Non-Disordered		poly_jg9956.t1	69.356	Non-Disordered		A0A024FWW7	77.2253	Non-Disordered						UMAG_04318	85.344	Non-Disordered		A0A507CWE5	74.3928	Non-Disordered
PBTT_09517	84.8782	Non-Disordered		A0A0H5R9L6	74.4587	Non-Disordered		poly_jg2825.t1	69.03	Disordered		A0A024GU63	77.0519	Non-Disordered						UMAG_00202	85.278	Non-Disordered		A0A507DDN8	74.3264	Non-Disordered
PBTT_01700	84.8337	Non-Disordered		A0A0H5RCV6	74.3883	Non-Disordered		poly_jg6866.t1	69.0271	Non-Disordered		A0A024G713	76.9216	Non-Disordered						UMAG_11690	85.191	Non-Disordered		A0A507DB10	74.2923	Non-Disordered
PBTT_05744	84.8099	Non-Disordered		A0A0H5QYI1	74.3595	Non-Disordered		poly_jg2656.t1	69.0168	Non-Disordered		A0A024FWK0	76.7891	Non-Disordered						UMAG_01022	85.186	Non-Disordered		A0A507D2Q3	74.2822	Non-Disordered
PBTT_05600	84.6672	Non-Disordered		A0A0H5QVL1	74.245	Non-Disordered		poly_jg3063.t1	68.8807	Disordered		A0A024FV20	76.5521	Non-Disordered						UMAG_00072	85.139	Non-Disordered		A0A507CI34	74.1536	Non-Disordered
PBTT_10170	84.5521	Non-Disordered		A0A0H5R3Q2	74.2068	Non-Disordered		poly_jg4270.t1	68.7116	Non-Disordered		A0A024FWT1	76.5359	Non-Disordered						UMAG_01427	85.121	Non-Disordered		A0A507DIK4	74.0626	Non-Disordered
PBTT_03971	84.5233	Non-Disordered		A0A0H5RU12	74.1855	Non-Disordered		poly_jg9973.t1	68.6325	Disordered		A0A024FV46	76.4631	Non-Disordered						UMAG_10831	85.089	Non-Disordered		A0A507DCW4	73.9456	Non-Disordered
PBTT_08344	84.5221	Non-Disordered		A0A0H5R5N9	73.5582	Non-Disordered		poly_jg7870.t1	68.5265	Non-Disordered		A0A024FVM3	76.4062	Non-Disordered						UMAG_12302	85.018	Non-Disordered		A0A507CIK2	73.9191	Non-Disordered
PBTT_01083	84.4862	Non-Disordered		A0A0H5R456	73.3487	Non-Disordered		poly_jg3936.t1	68.3952	Non-Disordered		A0A024GKI4	76.3776	Non-Disordered						UMAG_11417	84.982	Non-Disordered		A0A507DDB4	73.8951	Non-Disordered
PBTT_08765	84.4369	Non-Disordered		A0A0H5QU64	73.2579	Non-Disordered		poly_jg3058.t1	68.3229	Disordered		A0A024FUM1	76.3555	Non-Disordered						UMAG_05294	84.924	Non-Disordered		A0A507CTC8	73.8046	Non-Disordered
PBTT_08013	84.4225	Non-Disordered		A0A0H5QYT1	73.2326	Non-Disordered		poly_jg3025.t1	68.2325	Disordered		A0A024GA23	76.1876	Non-Disordered						UMAG_10632	84.828	Non-Disordered		A0A507D2V5	73.6785	Non-Disordered
PBTT_10280	84.1933	Non-Disordered		A0A0H5RDZ8	73.133	Non-Disordered		poly_jg8704.t1	68.0266	Non-Disordered		A0A024FWQ2	76.1438	Non-Disordered						UMAG_05312	84.786	Non-Disordered		A0A507DID8	73.5514	Non-Disordered
PBTT_09905	84.1559	Non-Disordered		A0A0H5QXA2	72.8763	Non-Disordered		poly_jg6947.t1	68.0034	Non-Disordered		A0A024GJX8	76.0989	Non-Disordered						UMAG_03749	84.672	Non-Disordered		A0A507CAN2	73.4922	Non-Disordered
PBTT_08157	84.1422	Non-Disordered		A0A0H5QKK6	72.8671	Non-Disordered		poly_jg4184.t1	67.5145	Non-Disordered		A0A024G4C4	76.0631	Non-Disordered						UMAG_04750	84.601	Non-Disordered		A0A507CPC1	73.36	Non-Disordered
PBTT_04407	84.1212	Non-Disordered		A0A0H5RHS6	72.8051	Non-Disordered		poly_jg4598.t1	67.5085	Non-Disordered		A0A024G8N3	75.7495	Non-Disordered						UMAG_11697	84.567	Non-Disordered		A0A507CYF5	73.3163	Non-Disordered
PBTT_02432	84.098	Non-Disordered		A0A0H5QN37	72.6058	Non-Disordered		poly_jg6304.t1	67.4903	Non-Disordered		A0A024GFG8	75.7297	Disordered						UMAG_05932	84.563	Non-Disordered		A0A507CST0	73.2591	Non-Disordered
PBTT_07746	84.0759	Disordered		A0A0H5QIF8	72.1864	Non-Disordered		poly_jg2040.t1	67.4621	Disordered		A0A024FX56	75.7183	Non-Disordered						UMAG_05223	84.552	Non-Disordered		A0A507CEZ1	73.1254	Non-Disordered
PBTT_05163	84.0449	Non-Disordered		A0A0H5RAW3	71.9702	Non-Disordered		poly_jg5917.t1	67.4589	Non-Disordered		A0A024FTK4	75.6791	Non-Disordered						UMAG_05173	84.534	Non-Disordered		A0A507CR71	73.1232	Non-Disordered
PBTT_04679	84.002	Non-Disordered		A0A0H5RT88	71.892	Non-Disordered		poly_jg9067.t1	67.2062	Non-Disordered		A0A024FWD0	75.6687	Non-Disordered						UMAG_10006	84.515	Non-Disordered		A0A507CIE5	73.0953	Non-Disordered
PBTT_02133	83.9858	Non-Disordered		A0A0H5QRR4	71.73	Non-Disordered		poly_jg9556.t1	67.1383	Non-Disordered		A0A024FWN2	75.5713	Non-Disordered						UMAG_KIS67053.1	84.244	Non-Disordered		A0A507CWA5	73.0476	Non-Disordered
PBTT_09659	83.9842	Non-Disordered		A0A0H5QM35	71.7184	Non-Disordered		poly_jg2392.t1	67.0465	Non-Disordered		A0A024GRV9	75.5354	Non-Disordered						UMAG_10945	84.178	Non-Disordered		A0A507CUC9	72.9584	Disordered
PBTT_08368	83.9366	Non-Disordered		A0A0H5RBS1	71.6492	Non-Disordered		poly_jg9678.t1	66.925	Non-Disordered		A0A024GNE5	75.4082	Non-Disordered						UMAG_KIS65797.1	84.126	Non-Disordered		A0A507C7X3	72.949	Non-Disordered
PBTT_00041	83.8953	Non-Disordered		A0A0H5RVN0	71.6483	Non-Disordered		poly_jg7961.t1	66.7538	Non-Disordered		A0A024GNS5	75.4053	Non-Disordered						UMAG_11425	84.04	Non-Disordered		A0A507CQG0	72.7743	Non-Disordered
PBTT_01546	83.786	Non-Disordered		A0A0H5QSR8	71.4137	Non-Disordered		poly_jg543.t1	66.6294	Non-Disordered		A0A024FTB3	75.3012	Non-Disordered						UMAG_12197	83.923	Non-Disordered		A0A507C6W7	72.7587	Non-Disordered
PBTT_01698	83.7598	Non-Disordered		A0A0H5R6D3	71.3241	Disordered		poly_jg2231.t1	66.3785	Non-Disordered		A0A024GGY8	75.2218	Non-Disordered						UMAG_03614	83.909	Non-Disordered		A0A507C205	72.7537	Non-Disordered
PBTT_01929	83.6631	Non-Disordered		A0A0H5R3P8	71.0022	Non-Disordered		poly_jg3237.t1	66.3679	Non-Disordered		A0A024FW89	75.1644	Non-Disordered						UMAG_01297	83.906	Non-Disordered		A0A507CZI8	72.682	Non-Disordered
PBTT_01846	83.4436	Non-Disordered		A0A0H5R1R0	70.4741	Non-Disordered		poly_jg4617.t1	66.2785	Non-Disordered		A0A024GJC9	75.0761	Non-Disordered						UMAG_KIS66889.1	83.883	Non-Disordered		A0A507CLL0	72.6688	Non-Disordered
PBTT_03683	83.4237	Non-Disordered		A0A0H5R6T5	70.3092	Non-Disordered		poly_jg9913.t1	66.0538	Disordered		A0A024FT95	74.9094	Non-Disordered						UMAG_05295	83.862	Non-Disordered		A0A507DA53	72.6488	Non-Disordered
PBTT_09534	83.4211	Non-Disordered		A0A0H5REK4	70.2821	Disordered		poly_jg1263.t1	66.0188	Non-Disordered		A0A024FYP9	74.6055	Non-Disordered						UMAG_10554	83.826	Non-Disordered		A0A507DG45	72.6104	Non-Disordered
PBTT_00324	83.3415	Non-Disordered		A0A0H5RQE3	70.2265	Non-Disordered		poly_jg10179.t1	65.9971	Non-Disordered		A0A024GDY3	74.6005	Non-Disordered						UMAG_12215	83.727	Non-Disordered		A0A507D5Q7	72.5828	Non-Disordered
PBTT_08343	83.3386	Non-Disordered		A0A0H5QXV7	70.1602	Non-Disordered		poly_jg262.t1	65.7957	Non-Disordered		A0A024G083	74.5227	Non-Disordered						UMAG_10555	83.699	Non-Disordered		A0A507CYB2	72.5644	Non-Disordered
PBTT_04946	83.2288	Non-Disordered		A0A0H5R403	70.0955	Non-Disordered		poly_jg2662.t1	65.673	Non-Disordered		A0A024GU36	74.5014	Non-Disordered						UMAG_04733	83.648	Non-Disordered		A0A507CNL4	72.5464	Non-Disordered
PBTT_03411	83.1725	Non-Disordered		A0A0H5QN69	69.9833	Non-Disordered		poly_jg10161.t1	65.51	Non-Disordered		A0A024GA39	74.386	Non-Disordered						UMAG_KIS70461.1	83.542	Non-Disordered		A0A507BP20	72.5231	Non-Disordered
PBTT_05855	83.1366	Non-Disordered		A0A0H5RBH3	69.942	Disordered		poly_jg8851.t1	65.1906	Non-Disordered		A0A024GG01	74.27	Non-Disordered						UMAG_15089	83.526	Non-Disordered		A0A507CU12	72.4208	Non-Disordered
PBTT_02729	83.1205	Non-Disordered		A0A0H5QPN0	69.646	Disordered		poly_jg6986.t1	65.1339	Non-Disordered		A0A024G5V5	74.2225	Non-Disordered						UMAG_05109	83.363	Non-Disordered		A0A507D1L5	72.3324	Non-Disordered
PBTT_06637	83.1204	Non-Disordered		A0A0H5QGE7	69.6325	Non-Disordered		poly_jg8954.t1	65.1111	Non-Disordered		A0A024GNR7	74.1693	Non-Disordered						UMAG_03392	83.303	Non-Disordered		A0A507D6M0	72.3199	Non-Disordered
PBTT_09379	82.9928	Non-Disordered		A0A0H5R2X2	69.5722	Non-Disordered		poly_jg9925.t1	65.0752	Disordered		A0A024FUF8	74.0729	Non-Disordered						UMAG_KIS70510.1	83.156	Non-Disordered		A0A507D1Y2	72.3101	Non-Disordered
PBTT_00836	82.9157	Non-Disordered		A0A0H5QVK8	69.4398	Non-Disordered		poly_jg7290.t2	65.0663	Non-Disordered		A0A024G3T5	73.9062	Disordered						UMAG_03476	83.054	Non-Disordered		A0A507D1B8	72.3094	Non-Disordered
PBTT_10175	82.8887	Non-Disordered		A0A0H5R1Y4	69.3862	Non-Disordered		poly_jg323.t1	64.9629	Non-Disordered		A0A024GNS6	73.8591	Non-Disordered						UMAG_05787	82.96	Non-Disordered		A0A507CSJ4	72.29	Non-Disordered
PBTT_07082	82.7692	Non-Disordered		A0A0H5R2S3	69.3585	Non-Disordered		poly_jg6318.t1	64.8095	Non-Disordered		A0A024FVG4	73.7912	Non-Disordered						UMAG_11886	82.917	Non-Disordered		A0A507CQD0	72.2845	Non-Disordered
PBTT_08315	82.7368	Non-Disordered		A0A0H5QI67	69.3221	Non-Disordered		poly_jg4346.t1	64.7724	Non-Disordered		A0A024GC73	73.783	Non-Disordered						UMAG_02178	82.84	Non-Disordered		A0A507CLI5	72.2692	Non-Disordered
PBTT_04945	82.6992	Non-Disordered		A0A0H5QJ05	69.2776	Non-Disordered		poly_jg9001.t1	64.6595	Non-Disordered		A0A024FTL6	73.632	Non-Disordered						UMAG_02852	82.801	Non-Disordered		A0A507CV17	72.2369	Non-Disordered
PBTT_03523	82.6696	Non-Disordered		A0A0H5QYP9	69.1386	Disordered		poly_jg5467.t1	64.6444	Non-Disordered		A0A024G6C6	73.4771	Non-Disordered						UMAG_11305	82.798	Non-Disordered		A0A507C8B0	72.1502	Non-Disordered
PBTT_02775	82.5776	Non-Disordered		A0A0H5R8A6	68.9819	Non-Disordered		poly_jg4770.t1	64.644	Non-Disordered		A0A024GAP6	73.463	Non-Disordered						UMAG_01820	82.756	Non-Disordered		A0A507DE29	72.1418	Non-Disordered
PBTT_06472	82.5039	Non-Disordered		A0A0H5QT85	68.7614	Non-Disordered		poly_jg1771.t1	64.6124	Non-Disordered		A0A024GTP4	73.3874	Non-Disordered						UMAG_05926	82.666	Non-Disordered		A0A507CAB6	72.0389	Non-Disordered
PBTT_04413	82.49	Non-Disordered		A0A0H5QRP3	68.7376	Disordered		poly_jg2582.t1	64.5881	Disordered		A0A024GJD3	73.3553	Non-Disordered						UMAG_05861	82.624	Non-Disordered		A0A507CUU5	71.826	Non-Disordered
PBTT_07850	82.4398	Non-Disordered		A0A0H5RRC6	68.6833	Disordered		poly_jg9711.t1	64.565	Non-Disordered		A0A024G3D7	73.3549	Non-Disordered						UMAG_05525	82.561	Non-Disordered		A0A507DGU8	71.806	Non-Disordered
PBTT_05132	82.3952	Non-Disordered		A0A0H5QGN7	68.6658	Non-Disordered		poly_jg8899.t1	64.551	Non-Disordered		A0A024GGT9	73.3543	Non-Disordered						UMAG_11586	82.483	Non-Disordered		A0A507CVI9	71.7732	Non-Disordered
PBTT_05672	82.3484	Non-Disordered		A0A0H5RCC5	68.6498	Non-Disordered		poly_jg3152.t1	64.5429	Disordered		A0A024GPT6	73.2981	Non-Disordered						UMAG_03616	82.423	Non-Disordered		A0A507CYL6	71.7215	Non-Disordered
PBTT_07486	82.3056	Non-Disordered		A0A0H5QEX9	68.5728	Non-Disordered		poly_jg1268.t1	64.5284	Non-Disordered		A0A024G8H3	73.2704	Non-Disordered						UMAG_02853	82.292	Non-Disordered		A0A507D2D5	71.6174	Non-Disordered
PBTT_08360	82.2664	Non-Disordered		A0A0H5RCL4	68.5612	Non-Disordered		poly_jg8973.t1	64.489	Non-Disordered		A0A024G4J9	73.1576	Non-Disordered						UMAG_06440	82.19	Non-Disordered		A0A507CSB6	71.6148	Non-Disordered
PBTT_10252	82.2526	Non-Disordered		A0A0H5QZQ9	68.1107	Disordered		poly_jg3668.t1	64.2501	Disordered		A0A024GQ19	72.992	Non-Disordered						UMAG_02230	82.17	Non-Disordered		A0A507CUA1	71.4762	Non-Disordered
PBTT_02776	82.1523	Non-Disordered		A0A0H5R4K2	67.8017	Non-Disordered		poly_jg3214.t1	64.0243	Non-Disordered		A0A024FVS6	72.9259	Non-Disordered						UMAG_10657	82.077	Non-Disordered		A0A507CPY4	71.4203	Disordered
PBTT_07741	82.1113	Non-Disordered		A0A0H5QQC1	67.7777	Disordered		poly_jg8024.t1	63.7551	Disordered		A0A024GT14	72.8723	Non-Disordered						UMAG_05704	81.93	Non-Disordered		A0A507D1U6	71.4139	Non-Disordered
PBTT_04740	82.0591	Non-Disordered		A0A0H5QFI6	67.6906	Non-Disordered		poly_jg5799.t1	63.4974	Non-Disordered		A0A024FV24	72.8711	Non-Disordered						UMAG_05929	81.911	Non-Disordered		A0A507D4D1	71.045	Non-Disordered
PBTT_05988	82.0275	Non-Disordered		A0A0H5QW39	67.6142	Non-Disordered		poly_jg5628.t1	63.4564	Disordered		A0A024GMV0	72.8543	Disordered						UMAG_00638	81.849	Non-Disordered		A0A507BZP2	71.0311	Non-Disordered
PBTT_07056	81.9332	Non-Disordered		A0A0H5QEL6	67.5308	Non-Disordered		poly_jg9482.t1	63.4352	Disordered		A0A024G2Y3	72.8121	Non-Disordered						UMAG_06162	81.846	Non-Disordered		A0A507DBS6	70.8867	Non-Disordered
PBTT_00149	81.861	Non-Disordered		A0A0H5RDE4	67.5056	Non-Disordered		poly_jg7501.t1	63.3662	Non-Disordered		A0A024FVU0	72.8088	Non-Disordered						UMAG_04035	81.757	Non-Disordered		A0A507CTF4	70.7954	Non-Disordered
PBTT_02712	81.8398	Non-Disordered		A0A0H5QTS7	66.9543	Non-Disordered		poly_jg2590.t1	63.3523	Non-Disordered		A0A024FUJ7	72.7541	Non-Disordered						UMAG_KIS65939.1	81.751	Non-Disordered		A0A507CF36	70.7372	Disordered
PBTT_04381	81.8335	Non-Disordered		A0A0H5QG97	66.7392	Disordered		poly_jg9167.t1	63.2545	Non-Disordered		A0A024FWW3	72.6785	Non-Disordered						UMAG_03860	81.749	Non-Disordered		A0A507D862	70.7273	Non-Disordered
PBTT_00593	81.7869	Non-Disordered		A0A0H5QZP0	66.6544	Non-Disordered		poly_jg2253.t1	63.2143	Non-Disordered		A0A024GV84	72.6005	Non-Disordered						UMAG_03752	81.679	Non-Disordered		A0A507DG65	70.6876	Non-Disordered
PBTT_02708	81.742	Non-Disordered		A0A0H5QL33	66.602	Disordered		poly_jg8025.t1	63.1171	Non-Disordered		A0A024FVF9	72.5302	Non-Disordered						UMAG_10582	81.636	Non-Disordered		A0A507CGQ5	70.6358	Non-Disordered
PBTT_08390	81.6578	Non-Disordered		A0A0H5QZM6	66.5714	Non-Disordered		poly_jg7881.t1	62.961	Disordered		A0A024GGT5	72.5039	Disordered						UMAG_01553	81.634	Non-Disordered		A0A507CL18	70.5953	Disordered
PBTT_06335	81.6004	Non-Disordered		A0A0H5RDF5	66.5451	Non-Disordered		poly_jg2906.t1	62.9392	Non-Disordered		A0A024GNX2	72.4837	Non-Disordered						UMAG_KIS65802.1	81.491	Non-Disordered		A0A507D333	70.5832	Non-Disordered
PBTT_06197	81.5425	Non-Disordered		A0A0H5R4S6	66.3992	Non-Disordered		poly_jg9423.t1	62.8636	Disordered		A0A024GSI5	72.4371	Non-Disordered						UMAG_KIS65763.1	81.466	Non-Disordered		A0A507D8J4	70.5707	Non-Disordered
PBTT_02571	81.5139	Non-Disordered		A0A0H5QRA8	66.0894	Non-Disordered		poly_jg7451.t1	62.8266	Non-Disordered		A0A024GNW9	72.3843	Non-Disordered						UMAG_11922	81.148	Non-Disordered		A0A507CNW3	70.4826	Non-Disordered
PBTT_06294	81.4273	Non-Disordered		A0A0H5RE25	66.0687	Non-Disordered		poly_jg3986.t1	62.5115	Non-Disordered		A0A024G6D6	72.2035	Non-Disordered						UMAG_05317	81.121	Non-Disordered		A0A507D699	70.34	Non-Disordered
PBTT_06280	81.37	Non-Disordered		A0A0H5QV17	65.9599	Non-Disordered		poly_jg9262.t1	62.4986	Disordered		A0A024G9B6	72.1362	Non-Disordered						UMAG_05027	81.113	Non-Disordered		A0A507DBR7	70.3145	Non-Disordered
PBTT_04328	81.3527	Non-Disordered		A0A0H5QH95	65.9594	Non-Disordered		poly_jg3858.t1	62.2752	Non-Disordered		A0A024GSW7	72.0878	Non-Disordered						UMAG_02854	80.993	Non-Disordered		A0A507DEU4	70.2999	Non-Disordered
PBTT_04988	81.3142	Non-Disordered		A0A0H5QU67	65.7565	Non-Disordered		poly_jg10081.t1	62.26	Non-Disordered		A0A024G6L5	72.0767	#N/A						UMAG_03923	80.888	Non-Disordered		A0A507BM18	70.2957	Non-Disordered
PBTT_06631	81.2932	Non-Disordered		A0A0H5RF28	65.6476	Non-Disordered		poly_jg10018.t1	62.2065	Disordered		A0A024GQU6	71.9937	Non-Disordered						UMAG_01143	80.849	Non-Disordered		A0A507CQC3	70.2552	Non-Disordered
PBTT_03965	81.2572	Non-Disordered		A0A0H5R464	65.4493	Non-Disordered		poly_jg2320.t1	62.1953	Non-Disordered		A0A024GIT2	71.9197	Non-Disordered						UMAG_KIS65800.1	80.768	Non-Disordered		A0A507DH00	70.2171	Non-Disordered
PBTT_03397	81.1536	Non-Disordered		A0A0H5RQ87	65.4364	Non-Disordered		poly_jg3367.t1	62.1104	Non-Disordered		A0A024G3W8	71.8279	Non-Disordered						UMAG_01860	80.728	Non-Disordered		A0A507D211	70.2068	Non-Disordered
PBTT_02777	81.0415	Non-Disordered		A0A0H5QNX2	65.1294	Disordered		poly_jg4093.t1	62.0639	Non-Disordered		A0A024GE28	71.8047	Non-Disordered						UMAG_10403	80.696	Non-Disordered		A0A507D1K5	70.1202	Non-Disordered
PBTT_02721	80.9297	Non-Disordered		A0A0H5R073	65.1183	Non-Disordered		poly_jg8501.t1	62.0432	Non-Disordered		A0A024GIJ9	71.7481	Non-Disordered						UMAG_00882	80.671	Non-Disordered		A0A507CLA9	70.1044	Non-Disordered
PBTT_04442	80.8734	Non-Disordered		A0A0H5QX98	64.9122	Non-Disordered		poly_jg4424.t1	61.9267	Non-Disordered		A0A024GND6	71.7246	Disordered						UMAG_05300	80.262	Non-Disordered		A0A507CTJ5	70.018	Non-Disordered
PBTT_07485	80.7415	Non-Disordered		A0A0H5REA8	64.8635	Non-Disordered		poly_jg7877.t1	61.9257	Disordered		A0A024G5L3	71.7104	Non-Disordered						UMAG_02865	80.252	Non-Disordered		A0A507CEF2	69.9273	Non-Disordered
PBTT_01737	80.6667	Non-Disordered		A0A0H5RD97	64.8468	Non-Disordered		poly_jg2332.t1	61.9178	Non-Disordered		A0A024GUV5	71.6432	Non-Disordered						UMAG_01213	80.237	Non-Disordered		A0A507CMN6	69.8867	Non-Disordered
PBTT_05162	80.6516	Non-Disordered		A0A0H5R051	64.7554	Non-Disordered		poly_jg7983.t1	61.9145	Non-Disordered		A0A024GI42	71.5857	Non-Disordered						UMAG_05604	80.201	Non-Disordered		A0A507D1N4	69.7984	Non-Disordered
PBTT_01892	80.6334	Non-Disordered		A0A0H5QJ44	64.4435	Disordered		poly_jg4220.t1	61.7516	Non-Disordered		A0A024GKW1	71.543	Non-Disordered						UMAG_05301	80.192	Non-Disordered		A0A507CJS8	69.766	Disordered
PBTT_10142	80.6322	Non-Disordered		A0A0H5QZ38	64.3884	Non-Disordered		poly_jg4550.t1	61.6322	Disordered		A0A024FTZ6	71.5375	Non-Disordered						UMAG_01299	80.15	Non-Disordered		A0A507DDM5	69.7522	Non-Disordered
PBTT_09588	80.5355	Non-Disordered		A0A0H5QXP6	64.1526	Non-Disordered		poly_jg10173.t1	61.5713	Non-Disordered		A0A024GKR9	71.5298	Non-Disordered						UMAG_00271	80.082	Non-Disordered		A0A507D3C0	69.7264	Non-Disordered
PBTT_06060	80.3723	Non-Disordered		A0A0H5QSE0	64.1369	Non-Disordered		poly_jg8815.t1	61.5367	Non-Disordered		A0A024FVF1	71.4718	Non-Disordered						UMAG_04039	79.934	Non-Disordered		A0A507D2P3	69.7202	Non-Disordered
PBTT_06061	80.3285	Non-Disordered		A0A0H5RA53	64.1339	Non-Disordered		poly_jg9782.t1	61.5256	Disordered		A0A024GVM7	71.4278	Non-Disordered						UMAG_11058	79.759	Non-Disordered		A0A507CNU9	69.6736	Non-Disordered
PBTT_04508	80.325	Non-Disordered		A0A0H5RL79	64.088	Non-Disordered		poly_jg7251.t1	61.5227	Non-Disordered		A0A024G6C9	71.3583	Non-Disordered						UMAG_11193	79.671	Non-Disordered		A0A507BUQ3	69.6581	Non-Disordered
PBTT_01974	80.2582	Non-Disordered		A0A0H5R4V1	63.9929	Disordered		poly_jg2528.t1	61.5174	Disordered		A0A024G6V6	71.305	Non-Disordered						UMAG_01241	79.649	Non-Disordered		A0A507D988	69.5971	Non-Disordered
PBTT_02529	80.2115	Non-Disordered		A0A0H5R816	63.6986	Non-Disordered		poly_jg9699.t1	61.4703	Non-Disordered		A0A024GN25	71.2487	Disordered						UMAG_05680	79.477	Non-Disordered		A0A507DBU5	69.3648	Non-Disordered
PBTT_09611	80.1509	Non-Disordered		A0A0H5R5H7	63.4524	Non-Disordered		poly_jg6044.t1	61.2331	Non-Disordered		A0A024FXJ2	71.1768	Non-Disordered						UMAG_00013	79.401	Non-Disordered		A0A507CY24	69.3631	Non-Disordered
PBTT_06465	80.1316	Non-Disordered		A0A0H5R8V3	63.2691	Non-Disordered		poly_jg116.t1	61.2028	Non-Disordered		A0A024FTL8	71.121	Non-Disordered						UMAG_10556	79.238	Non-Disordered		A0A507D6F0	69.3431	Non-Disordered
PBTT_05854	80.1007	Non-Disordered		A0A0H5RF55	63.2619	Non-Disordered		poly_jg2795.t3	61.1089	Non-Disordered		A0A024FYP1	70.9745	Non-Disordered						UMAG_11801	79.213	Non-Disordered		A0A507C2H0	69.305	Non-Disordered
PBTT_03934	80.09	Non-Disordered		A0A0H5RB81	63.1775	Disordered		poly_jg8293.t1	60.9993	Disordered		A0A024GMN4	70.8744	Non-Disordered						UMAG_00876	79.188	Non-Disordered		A0A507CXI7	68.9032	Non-Disordered
PBTT_05165	79.7182	Non-Disordered		A0A0H5QS28	62.9313	Non-Disordered		poly_jg8076.t1	60.9187	Non-Disordered		A0A024G5L8	70.8122	Non-Disordered						UMAG_02537	79.147	Non-Disordered		A0A507DFL6	68.8656	Non-Disordered
PBTT_07405	79.6644	Non-Disordered		A0A0H5QNJ4	62.659	#N/A		poly_jg1998.t1	60.8423	Non-Disordered		A0A024FUU8	70.6177	Non-Disordered						UMAG_00144	78.975	Non-Disordered		A0A507CZ87	68.8588	Non-Disordered
PBTT_04947	79.5858	Non-Disordered		A0A0H5RDF0	62.3598	Non-Disordered		poly_jg8317.t1	60.8348	Non-Disordered		A0A024GNM8	70.5908	Non-Disordered						UMAG_02540	78.768	Non-Disordered		A0A507C577	68.8423	Non-Disordered
PBTT_09503	79.535	Non-Disordered		A0A0H5QI59	62.3544	Non-Disordered		poly_jg9387.t1	60.4563	Non-Disordered		A0A024FX09	70.5715	Non-Disordered						UMAG_10474	78.714	Non-Disordered		A0A507D7L3	68.8255	Non-Disordered
PBTT_10397	79.4609	Non-Disordered		A0A0H5QFC7	62.2791	Non-Disordered		poly_jg8335.t1	60.3421	Disordered		A0A024GGQ2	70.469	Non-Disordered						UMAG_05528	78.541	Non-Disordered		A0A507CQ33	68.7552	Non-Disordered
PBTT_09289	79.4424	Non-Disordered		A0A0H5QX63	62.2562	Non-Disordered		poly_jg2739.t1	60.296	Disordered		A0A024FYL3	70.4348	Non-Disordered						UMAG_11569	78.4	Non-Disordered		A0A507CFY3	68.7381	Non-Disordered
PBTT_09974	79.3241	Non-Disordered		A0A0H5R8I6	62.1897	Disordered		poly_jg9531.t1	60.231	Disordered		A0A024GFJ2	70.2531	Non-Disordered						UMAG_00309	78.384	Non-Disordered		A0A507D330	68.7032	Non-Disordered
PBTT_02656	79.2617	Non-Disordered		A0A0H5QI55	62.0266	Non-Disordered		poly_jg1021.t1	60.1713	Non-Disordered		A0A024FWV7	70.2389	Non-Disordered						UMAG_05302	78.312	Non-Disordered		A0A507CKU7	68.6233	Non-Disordered
PBTT_02709	79.2113	Non-Disordered		A0A0H5QJW2	61.8291	Non-Disordered		poly_jg9868.t1	60.0537	Non-Disordered		A0A024FTA9	70.1298	Non-Disordered						UMAG_03751	78.251	Non-Disordered		A0A507CCD5	68.5788	Non-Disordered
PBTT_02906	79.1911	Non-Disordered		A0A0H5R3V0	61.7702	Disordered		poly_jg7247.t1	59.7567	Disordered		A0A024GAV8	70.0957	Non-Disordered						UMAG_05036	78.204	Non-Disordered		A0A507D2Z9	68.5461	Non-Disordered
PBTT_00335	79.1689	Non-Disordered		A0A0H5QTY3	61.7401	Non-Disordered		poly_jg9957.t1	59.7527	Non-Disordered		A0A024GTN7	69.8669	Non-Disordered						UMAG_04104	78.189	Non-Disordered		A0A507DKW4	68.4684	Non-Disordered
PBTT_06985	79.0446	Non-Disordered		A0A0H5QX58	61.6961	Non-Disordered		poly_jg10071.t1	59.7288	Non-Disordered		A0A024GII3	69.7174	Non-Disordered						UMAG_10823	78.068	Non-Disordered		A0A507DJZ7	68.3601	Non-Disordered
PBTT_08611	79.0234	Non-Disordered		A0A0H5QY50	61.6266	Non-Disordered		poly_jg7441.t1	59.6943	Non-Disordered		A0A024GDQ9	69.3684	Disordered						UMAG_10963	78.058	Non-Disordered		A0A507CHL8	68.3477	Disordered
PBTT_08398	78.8761	Non-Disordered		A0A0H5R1P4	61.5611	Non-Disordered		poly_jg9746.t1	59.6601	Non-Disordered		A0A024GVL6	69.3449	Non-Disordered						UMAG_05439	78.016	Disordered		A0A507D2E0	68.3296	Non-Disordered
PBTT_07330	78.7631	Non-Disordered		A0A0H5QLP0	61.5201	Disordered		poly_jg9463.t1	59.6403	Disordered		A0A024GPV8	69.2694	Non-Disordered						UMAG_02430	77.989	Non-Disordered		A0A507CN20	68.1135	Non-Disordered
PBTT_07925	78.648	Non-Disordered		A0A0H5R645	61.4907	Non-Disordered		poly_jg4449.t1	59.6276	Disordered		A0A024GLY8	69.2645	Disordered						UMAG_06190	77.982	Non-Disordered		A0A507D1W8	68.0621	Disordered
PBTT_06196	78.6195	Non-Disordered		A0A0H5R3W4	61.4658	Non-Disordered		poly_jg1302.t1	59.5284	Non-Disordered		A0A024GJ01	69.2553	Non-Disordered						UMAG_05546	77.967	Non-Disordered		A0A507C1R2	68.0426	Non-Disordered
PBTT_09820	78.3672	Non-Disordered		A0A0H5QXU5	61.4298	Non-Disordered		poly_jg1425.t1	59.4165	Disordered		A0A024GM69	69.1935	Non-Disordered						UMAG_00159	77.947	Non-Disordered		A0A507CLZ2	67.997	Non-Disordered
PBTT_08654	78.3312	Non-Disordered		A0A0H5QY45	61.3797	Non-Disordered		poly_jg5341.t1	59.4134	Disordered		A0A024FTK3	68.877	Non-Disordered						UMAG_11652	77.844	Non-Disordered		A0A507D029	67.8224	Non-Disordered
PBTT_03292	78.1811	Disordered		A0A0H5QXB0	61.2998	Non-Disordered		poly_jg7440.t1	58.9982	Disordered		A0A024G6V2	68.7024	Non-Disordered						UMAG_11637	77.818	Non-Disordered		A0A507CB50	67.668	Non-Disordered
PBTT_07835	78.1368	Non-Disordered		A0A0H5R8L1	61.2323	Disordered		poly_jg6167.t1	58.8883	Non-Disordered		A0A024G985	68.6089	Non-Disordered						UMAG_03972	77.746	Non-Disordered		A0A507D0R9	67.6238	Non-Disordered
PBTT_07461	78.1111	Non-Disordered		A0A0H5QUF6	61.0571	Non-Disordered		poly_jg1950.t1	58.8757	Disordered		A0A024FU20	68.5715	Non-Disordered						UMAG_11002	77.718	Non-Disordered		A0A507DFM6	67.5687	Disordered
PBTT_10184	78.0911	Non-Disordered		A0A0H5R6U8	60.9437	Non-Disordered		poly_jg3927.t1	58.8104	Disordered		A0A024FVS7	68.5561	Non-Disordered						UMAG_05299	77.713	Non-Disordered		A0A507CY85	67.5593	Non-Disordered
PBTT_06059	77.9446	Non-Disordered		A0A0H5RKB8	60.9177	Non-Disordered		poly_jg1500.t1	58.6019	Disordered		A0A024G4W5	68.4088	Non-Disordered						UMAG_04893	77.614	Non-Disordered		A0A507C2K7	67.5528	Non-Disordered
PBTT_05582	77.8272	Non-Disordered		A0A0H5QKU0	60.7567	Non-Disordered		poly_jg9175.t1	58.3611	Disordered		A0A024G5B0	68.3881	Disordered						UMAG_02851	77.579	Non-Disordered		A0A507CBQ4	67.5368	Non-Disordered
PBTT_04168	77.7092	Non-Disordered		A0A0H5QX53	60.6395	Non-Disordered		poly_jg9427.t1	58.3352	Non-Disordered		A0A024G7E8	68.3324	Non-Disordered						UMAG_03231	77.514	Non-Disordered		A0A507CBV0	67.53	Non-Disordered
PBTT_09756	77.6931	Non-Disordered		A0A0H5QU06	60.3759	Non-Disordered		poly_jg362.t1	58.2897	Disordered		A0A024GRC7	68.2994	Non-Disordered						UMAG_10402	77.48	Non-Disordered		A0A507C7P0	67.5213	Non-Disordered
PBTT_08987	77.6895	Non-Disordered		A0A0H5QNG2	60.1891	Non-Disordered		poly_jg3693.t1	58.2507	Non-Disordered		A0A024FX58	68.2664	Non-Disordered						UMAG_12313	77.378	Non-Disordered		A0A507CLY4	67.5093	Non-Disordered
PBTT_00579	77.5906	Non-Disordered		A0A0H5QIA8	60.1214	Non-Disordered		poly_jg6237.t1	58.1756	Non-Disordered		A0A024FY20	68.2317	Non-Disordered						UMAG_04111	77.338	Non-Disordered		A0A507D1K0	67.482	Non-Disordered
PBTT_06033	77.5835	Non-Disordered		A0A0H5R4L1	59.8012	Disordered		poly_jg2655.t1	58.1606	Non-Disordered		A0A024FWH3	68.0933	Non-Disordered						UMAG_03563	77.326	Non-Disordered		A0A507D6F4	67.4776	Non-Disordered
PBTT_07459	77.5594	Non-Disordered		A0A0H5QHL0	59.7163	Non-Disordered		poly_jg869.t1	57.9866	Non-Disordered		A0A024GFR4	67.8997	Disordered						UMAG_04630	77.2	Non-Disordered		A0A507CH43	67.4704	Non-Disordered
PBTT_02651	77.5018	Non-Disordered		A0A0H5RBD7	59.309	Non-Disordered		poly_jg7759.t1	57.846	Disordered		A0A024GR98	67.7936	Non-Disordered						UMAG_12032	77.176	Non-Disordered		A0A507CRL6	67.431	Non-Disordered
PBTT_05599	77.4874	Non-Disordered		A0A0H5R493	59.2435	Non-Disordered		poly_jg6768.t1	57.8244	Disordered		A0A024GIL3	67.768	Non-Disordered						UMAG_00438	77.165	Disordered		A0A507CC72	67.387	#N/A
PBTT_02693	77.4569	Non-Disordered		A0A0H5RDS8	59.161	Non-Disordered		poly_jg94.t1	57.8238	Non-Disordered		A0A024GS90	67.6958	Non-Disordered						UMAG_11444	77.121	Non-Disordered		A0A507DER9	67.3847	Non-Disordered
PBTT_05510	77.2162	Non-Disordered		A0A0H5RKG6	59.1512	Disordered		poly_jg9133.t1	57.7975	Non-Disordered		A0A024GI90	67.694	Non-Disordered						UMAG_00054	77.082	Non-Disordered		A0A507D4R0	67.2917	Non-Disordered
PBTT_02610	77.1443	Non-Disordered		A0A0H5R710	59.0452	Non-Disordered		poly_jg4402.t1	57.611	Non-Disordered		A0A024FXB9	67.6439	Disordered						UMAG_00411	77	Non-Disordered		A0A507CWY5	67.2449	Non-Disordered
PBTT_04152	77.0632	Non-Disordered		A0A0H5RDR8	58.9053	Disordered		poly_jg8242.t1	57.5862	Non-Disordered		A0A024G4A4	67.5385	Disordered						UMAG_10816	76.935	Non-Disordered		A0A507CHY2	67.1933	Non-Disordered
PBTT_03992	76.8084	Non-Disordered		A0A0H5R5E2	58.6314	Disordered		poly_jg7290.t3	57.5478	Non-Disordered		A0A024G5T4	67.5239	Non-Disordered						UMAG_05305	76.864	Non-Disordered		A0A507CBU2	67.1928	Non-Disordered
PBTT_04576	76.8007	Non-Disordered		A0A0H5RED2	58.5225	Non-Disordered		poly_jg9577.t1	57.4952	Non-Disordered		A0A024G0C6	67.5149	Non-Disordered						UMAG_00684	76.859	Non-Disordered		A0A507CYC5	67.155	Non-Disordered
PBTT_01416	76.7959	Non-Disordered		A0A0H5RD88	58.3193	Non-Disordered		poly_jg9823.t1	57.4858	Non-Disordered		A0A024GIG3	67.4936	Disordered						UMAG_10676	76.803	Non-Disordered		A0A507DM25	67.1041	Disordered
PBTT_06375	76.7384	Non-Disordered		A0A0H5QQU6	58.1239	Non-Disordered		poly_jg2324.t1	57.478	Non-Disordered		A0A024G9X9	67.4359	Non-Disordered						UMAG_02063	76.563	Non-Disordered		A0A507CL39	67.043	Non-Disordered
PBTT_09662	76.716	Non-Disordered		A0A0H5QQG0	57.7094	Disordered		poly_jg3326.t1	57.4095	Non-Disordered		A0A024GIE1	67.3137	Non-Disordered						UMAG_06128	76.506	Non-Disordered		A0A507CX49	66.9737	Non-Disordered
PBTT_09511	76.7063	Non-Disordered		A0A0H5QMH9	57.5692	Disordered		poly_jg3708.t1	57.3667	Non-Disordered		A0A024G998	66.7504	Non-Disordered						UMAG_01851	76.487	Non-Disordered		A0A507D3N5	66.9732	Non-Disordered
PBTT_06563	76.6697	Non-Disordered		A0A0H5QGG5	57.4783	Disordered		poly_jg2213.t1	57.2719	Disordered		A0A024GPT0	66.6996	Disordered						UMAG_04027	76.456	Non-Disordered		A0A507C9S6	66.8929	Non-Disordered
PBTT_07418	76.6343	Non-Disordered		A0A0H5QLB7	57.3094	Disordered		poly_jg4001.t1	57.2191	Non-Disordered		A0A024FVD1	66.6924	Disordered						UMAG_12226	76.399	Non-Disordered		A0A507CZ68	66.891	Non-Disordered
PBTT_00831	76.5642	Non-Disordered		A0A0H5R9Y2	57.2493	Non-Disordered		poly_jg1868.t1	57.1787	Disordered		A0A024GGD6	66.5742	Disordered						UMAG_02981	76.344	Disordered		A0A507CJL1	66.8722	Non-Disordered
PBTT_08334	76.5586	Non-Disordered		A0A0H5QXV1	57.1334	Non-Disordered		poly_jg2646.t1	57.1267	Non-Disordered		A0A024GKM7	66.5659	Non-Disordered						UMAG_00793	76.143	Non-Disordered		A0A507CQ31	66.7815	Non-Disordered
PBTT_08323	76.4585	Non-Disordered		A0A0H5R2J4	57.0468	Non-Disordered		poly_jg982.t1	56.888	Non-Disordered		A0A024G9E0	66.3575	Non-Disordered						UMAG_11763	76	Non-Disordered		A0A507CUL7	66.7387	Non-Disordered
PBTT_10062	76.4392	Non-Disordered		A0A0H5QYB6	57.0141	Non-Disordered		poly_jg5913.t1	56.6575	Non-Disordered		A0A024GUI2	66.3347	Non-Disordered						UMAG_06127	75.767	Non-Disordered		A0A507CP65	66.7143	Non-Disordered
PBTT_00838	76.4202	Non-Disordered		A0A0H5RDD5	56.7442	Disordered		poly_jg1427.t1	56.5233	Disordered		A0A024GKU5	66.3242	Non-Disordered						UMAG_00081	75.762	Non-Disordered		A0A507C271	66.6952	Non-Disordered
PBTT_10460	76.4065	Non-Disordered		A0A0H5QZ37	56.6672	Non-Disordered		poly_jg7446.t1	56.4671	Non-Disordered		A0A024FWB1	66.2789	Disordered						UMAG_02196	75.733	Non-Disordered		A0A507CME7	66.6939	Non-Disordered
PBTT_07462	76.29	Non-Disordered		A0A0H5QN33	56.5775	Non-Disordered		poly_jg9238.t1	56.4484	Disordered		A0A024GFU0	66.2427	Non-Disordered						UMAG_05733	75.659	Non-Disordered		A0A507CDG5	66.5982	Non-Disordered
PBTT_00788	76.2686	Non-Disordered		A0A0H5QZ53	56.5735	Non-Disordered		poly_jg9741.t1	56.3911	Non-Disordered		A0A024GKN8	65.9749	Non-Disordered						UMAG_00250	75.647	Non-Disordered		A0A507C8X9	66.5604	Non-Disordered
PBTT_04558	75.9429	Disordered		A0A0H5QM48	56.3144	Non-Disordered		poly_jg4113.t1	56.3719	Disordered		A0A024GFH8	65.9452	Disordered						UMAG_05104	75.637	Disordered		A0A507CLP9	66.5269	Non-Disordered
PBTT_00954	75.9422	Non-Disordered		A0A0H5QME6	56.3109	Non-Disordered		poly_jg5851.t1	56.3105	Non-Disordered		A0A024GKR4	65.8243	Non-Disordered						UMAG_05988	75.565	Non-Disordered		A0A507CEM4	66.5182	Non-Disordered
PBTT_10089	75.8916	Non-Disordered		A0A0H5RFX1	56.2212	Disordered		poly_jg9595.t1	56.2785	Non-Disordered		A0A024FYT3	65.7891	Non-Disordered						UMAG_KIS65801.1	75.561	Non-Disordered		A0A507CVI0	66.4854	Non-Disordered
PBTT_07987	75.8779	Non-Disordered		A0A0H5QHW1	56.2179	Non-Disordered		poly_jg8905.t1	56.2026	Non-Disordered		A0A024FWF6	65.5395	Non-Disordered						UMAG_KIS70247.1	75.319	Disordered		A0A507BR10	66.4662	Non-Disordered
PBTT_06624	75.8363	Non-Disordered		A0A0H5QUY0	56.1745	Non-Disordered		poly_jg9938.t1	56.0352	Non-Disordered		A0A024G0X3	65.4442	Disordered						UMAG_02535	75.152	Non-Disordered		A0A507D4R5	66.4635	Non-Disordered
PBTT_05776	75.7799	Non-Disordered		A0A0H5QN52	56.1118	Disordered		poly_jg9573.t1	56.0184	Non-Disordered		A0A024FTD0	65.3938	Non-Disordered						UMAG_03467	75.009	Non-Disordered		A0A507CFX0	66.319	Non-Disordered
PBTT_10409	75.5832	Non-Disordered		A0A0H5RKZ6	56.0146	Disordered		poly_jg7515.t1	55.8738	Non-Disordered		A0A024FX61	65.2467	Non-Disordered						UMAG_11443	74.978	Non-Disordered		A0A507CBU1	66.3141	Non-Disordered
PBTT_09826	75.5711	Non-Disordered		A0A0H5REK9	55.9194	Non-Disordered		poly_jg2335.t1	55.7031	Non-Disordered		A0A024FUE8	65.2357	Non-Disordered						UMAG_10221	74.912	Non-Disordered		A0A507CK02	66.249	Non-Disordered
PBTT_06754	75.2299	Non-Disordered		A0A0H5RAU6	55.8561	Non-Disordered		poly_jg5814.t1	55.6492	Non-Disordered		A0A024GA40	65.1404	Non-Disordered						UMAG_11020	74.892	Non-Disordered		A0A507CWI2	66.2299	Non-Disordered
PBTT_00259	75.2089	Non-Disordered		A0A0H5RV92	55.8169	Disordered		poly_jg7771.t1	55.6385	Disordered		A0A024FWQ0	65.0155	Non-Disordered						UMAG_06218	74.866	Disordered		A0A507CXH4	66.2217	Non-Disordered
PBTT_05557	74.7214	Non-Disordered		A0A0H5RG52	55.8102	Disordered		poly_jg4247.t1	55.561	Non-Disordered		A0A024GBM1	64.958	Non-Disordered						UMAG_02597	74.846	Non-Disordered		A0A507D0Q2	66.2177	Non-Disordered
PBTT_08033	74.7033	Non-Disordered		A0A0H5QMG6	55.8076	Disordered		poly_jg7513.t1	55.2436	Non-Disordered		A0A024GA37	64.9363	Disordered						UMAG_01690	74.744	Disordered		A0A507CYK6	66.1997	Non-Disordered
PBTT_07776	74.5177	Non-Disordered		A0A0H5QVE3	55.6624	Non-Disordered		poly_jg2427.t1	55.1673	Disordered		A0A024FZN7	64.9011	Non-Disordered						UMAG_10501	74.591	Non-Disordered		A0A507D369	66.1875	Non-Disordered
PBTT_05617	74.4099	Non-Disordered		A0A0H5R402	55.5044	Non-Disordered		poly_jg6171.t1	55.1655	Non-Disordered		A0A024GGT6	64.7744	Non-Disordered						UMAG_11416	74.574	Non-Disordered		A0A507CLH8	66.1759	Non-Disordered
PBTT_02494	74.4027	Non-Disordered		A0A0H5QUR0	55.354	Non-Disordered		poly_jg6806.t1	55.1047	Disordered		A0A024GK84	64.7365	Non-Disordered						UMAG_11908	74.5	Non-Disordered		A0A507CYX9	66.1319	Non-Disordered
PBTT_08875	74.3872	Non-Disordered		A0A0H5R6E7	55.3407	Disordered		poly_jg5800.t1	55.0396	Non-Disordered		A0A024GIA1	64.5944	#N/A						UMAG_01953	74.369	Non-Disordered		A0A507CM14	65.9406	Disordered
PBTT_01547	74.2671	Non-Disordered		A0A0H5RFI4	55.3072	Disordered		poly_jg6064.t1	54.856	Non-Disordered		A0A024FWJ2	64.533	Non-Disordered						UMAG_KIS66753.1	74.166	Disordered		A0A507CFS2	65.9369	Non-Disordered
PBTT_03954	74.2669	Non-Disordered		A0A0H5QHB9	55.1731	#N/A		poly_jg7517.t1	54.8353	Non-Disordered		A0A024G965	64.4365	Disordered						UMAG_00792	74.074	Non-Disordered		A0A507D4T3	65.9171	Non-Disordered
PBTT_03043	74.2243	Non-Disordered		A0A0H5QFK2	55.1503	Disordered		poly_jg3914.t1	54.7753	Non-Disordered		A0A024GSF9	64.2639	Non-Disordered						UMAG_05046	74.006	Disordered		A0A507CDU1	65.9107	Non-Disordered
PBTT_07576	74.1427	Non-Disordered		A0A0H5R3K8	55.0707	Disordered		poly_jg247.t2	54.6944	Disordered		A0A024GUS4	64.2522	Non-Disordered						UMAG_05819	73.939	Non-Disordered		A0A507D3F8	65.9088	Non-Disordered
PBTT_07455	74.0742	Non-Disordered		A0A0H5QW83	55.0199	Non-Disordered		poly_jg6008.t1	54.6935	Disordered		A0A024G0S2	64.2078	Non-Disordered						UMAG_02294	73.851	Non-Disordered		A0A507CN25	65.8539	Non-Disordered
PBTT_05618	73.9807	Non-Disordered		A0A0H5R647	55.0051	Non-Disordered		poly_jg1326.t1	54.515	Non-Disordered		A0A024GV38	64.0563	Non-Disordered						UMAG_12216	73.383	Non-Disordered		A0A507CJA8	65.7653	Non-Disordered
PBTT_03065	73.9352	Non-Disordered		A0A0H5REH8	54.9861	Non-Disordered		poly_jg7321.t1	54.4281	Disordered		A0A024GQ10	64.0146	Non-Disordered						UMAG_12253	73.273	Non-Disordered		A0A507DGW5	65.7414	Non-Disordered
PBTT_05033	73.6965	Non-Disordered		A0A0H5RFL4	54.8769	Disordered		poly_jg8942.t1	54.329	Disordered		A0A024GE61	64.0076	Disordered						UMAG_11915	73.264	Non-Disordered		A0A507DJ26	65.4962	Non-Disordered
PBTT_09527	73.4787	Non-Disordered		A0A0H5R3H8	54.8549	Disordered		poly_jg247.t1	54.2863	Disordered		A0A024G2Z3	63.9046	Disordered						UMAG_05780	73.258	Non-Disordered		A0A507CYI8	65.338	Non-Disordered
PBTT_00253	73.1511	Non-Disordered		A0A0H5R5C9	54.8334	Disordered		poly_jg2594.t1	54.2667	Non-Disordered		A0A024GLV4	63.8255	Non-Disordered						UMAG_05303	73.243	Non-Disordered		A0A507C7S6	65.3175	Non-Disordered
PBTT_02243	72.9752	Disordered		A0A0H5RWF8	54.7351	Disordered		poly_jg10207.t1	54.2267	Non-Disordered		A0A024FVH7	63.5219	Non-Disordered						UMAG_00795	73.199	Non-Disordered		A0A507CB01	65.2962	Non-Disordered
PBTT_05304	72.8732	Non-Disordered		A0A0H5R3E1	54.7018	Non-Disordered		poly_jg6019.t1	54.0762	Non-Disordered		A0A024GBV2	63.4808	Non-Disordered						UMAG_01976	73.169	Non-Disordered		A0A507DDZ7	65.2759	Non-Disordered
PBTT_00306	72.8439	Disordered		A0A0H5RAH8	54.6567	Non-Disordered		poly_jg4070.t1	54.0426	Disordered		A0A024FVH0	63.2259	Non-Disordered						UMAG_01204	73.022	Disordered		A0A507CDU4	65.2592	Non-Disordered
PBTT_04342	72.8258	Non-Disordered		A0A0H5R580	54.648	Non-Disordered		poly_jg9103.t1	53.9169	Non-Disordered		A0A024GVW6	63.1605	Disordered						UMAG_05781	72.958	Non-Disordered		A0A507CJ70	65.245	Non-Disordered
PBTT_10081	72.7486	Non-Disordered		A0A0H5RAF6	54.3977	Non-Disordered		poly_jg1429.t1	53.9009	Disordered		A0A024GFE4	63.1534	Disordered						UMAG_05352	72.809	Non-Disordered		A0A507CQR0	65.0974	Non-Disordered
PBTT_05673	72.6905	Non-Disordered		A0A0H5QGN2	54.3787	Non-Disordered		poly_jg6535.t1	53.8057	Non-Disordered		A0A024GEG3	62.9989	Disordered						UMAG_10323	72.505	Non-Disordered		A0A507D6R6	65.0959	Non-Disordered
PBTT_02672	72.6418	Disordered		A0A0H5QRK6	54.1602	Disordered		poly_jg9825.t1	53.7625	Non-Disordered		A0A024GUJ6	62.91	Non-Disordered						UMAG_06112	72.413	Non-Disordered		A0A507CWL3	65.0658	Non-Disordered
PBTT_07696	72.3085	Non-Disordered		A0A0H5RDV2	54.0156	#N/A		poly_jg115.t1	53.6261	Non-Disordered		A0A024G417	62.9056	Disordered						UMAG_03201	72.411	Non-Disordered		A0A507DGV9	65.039	Non-Disordered
PBTT_00818	71.9815	Non-Disordered		A0A0H5R4F0	53.7505	Non-Disordered		poly_jg3573.t1	53.5894	Non-Disordered		A0A024FVP0	62.8014	Non-Disordered						UMAG_11555	72.318	Non-Disordered		A0A507CXP3	64.9918	Non-Disordered
PBTT_08608	71.9194	Non-Disordered		A0A0H5RCZ9	53.6552	Non-Disordered		poly_jg9507.t1	53.5515	Non-Disordered		A0A024GR53	62.8004	Non-Disordered						UMAG_10514	71.885	Disordered		A0A507CYY4	64.9379	Non-Disordered
PBTT_04523	71.9127	Disordered		A0A0H5R9Q6	53.5715	Non-Disordered		poly_jg8295.t1	53.4897	Non-Disordered		A0A024GJI7	62.7255	Disordered						UMAG_05928	71.844	Non-Disordered		A0A507D3N1	64.7903	Non-Disordered
PBTT_07602	71.8992	Non-Disordered		A0A0H5R566	53.4233	Disordered		poly_jg3185.t1	53.4415	Non-Disordered		A0A024GMY2	62.4679	#N/A						UMAG_11060	71.687	Non-Disordered		A0A507CQ38	64.7857	Non-Disordered
PBTT_07184	71.7668	Non-Disordered		A0A0H5R5E3	53.2808	Non-Disordered		poly_jg37.t1	53.4382	Non-Disordered		A0A024GVN5	62.3853	Disordered						UMAG_KIS67142.1	71.626	Non-Disordered		A0A507BW31	64.7355	Non-Disordered
PBTT_05777	71.7557	Non-Disordered		A0A0H5QWN6	52.749	Non-Disordered		poly_jg655.t1	53.4094	Non-Disordered		A0A024FUP1	62.3247	Non-Disordered						UMAG_00723	71.469	Non-Disordered		A0A507CV82	64.6776	Non-Disordered
PBTT_07774	71.7285	Non-Disordered		A0A0H5QTQ2	52.7431	Non-Disordered		poly_jg5425.t1	53.2383	Non-Disordered		A0A024FWU5	62.2746	Non-Disordered						UMAG_KIS65798.1	71.384	Non-Disordered		A0A507DIY4	64.6001	Disordered
PBTT_05845	71.6787	Non-Disordered		A0A0H5QQC8	52.7044	Disordered		poly_jg8374.t1	53.1329	Non-Disordered		A0A024GAG1	62.0996	Non-Disordered						UMAG_02526	71.293	Non-Disordered		A0A507CRX6	64.5751	Non-Disordered
PBTT_04498	71.6234	Non-Disordered		A0A0H5RWC4	52.6594	Non-Disordered		poly_jg6535.t2	53.1237	Non-Disordered		A0A024GKH4	61.9999	Non-Disordered						UMAG_04708	71.101	Non-Disordered		A0A507DHN2	64.554	Non-Disordered
PBTT_05243	71.5404	Non-Disordered		A0A0H5RFX7	52.6389	Disordered		poly_jg7892.t1	53.0331	Disordered		A0A024GDZ7	61.9668	Non-Disordered						UMAG_05822	71.003	Non-Disordered		A0A507CNH4	64.5431	Disordered
PBTT_05629	71.4096	Non-Disordered		A0A0H5RF78	52.6152	Disordered		poly_jg9951.t1	52.9698	Non-Disordered		A0A024GMI6	61.7402	Disordered						UMAG_02297	70.99	Non-Disordered		A0A507CRA9	64.5252	Non-Disordered
PBTT_04627	71.333	Non-Disordered		A0A0H5QLL2	52.5839	Non-Disordered		poly_jg2310.t1	52.8106	Non-Disordered		A0A024GH15	61.3302	Disordered						UMAG_11362	70.918	Non-Disordered		A0A507CPP9	64.4014	Non-Disordered
PBTT_05659	71.3153	Non-Disordered		A0A0H5QW75	52.438	Non-Disordered		poly_jg1233.t1	52.7885	Non-Disordered		A0A024FWE7	61.3017	Non-Disordered						UMAG_10553	70.836	Non-Disordered		A0A507CJ36	64.3964	Non-Disordered
PBTT_04628	71.3133	Non-Disordered		A0A0H5R157	52.1385	Non-Disordered		poly_jg10070.t1	52.6638	Non-Disordered		A0A024FU93	61.3001	Non-Disordered						UMAG_01987	70.809	Non-Disordered		A0A507D4J1	64.3924	Non-Disordered
PBTT_10378	71.1075	Non-Disordered		A0A0H5QVS7	52.1053	Non-Disordered		poly_jg9526.t1	52.6619	Disordered		A0A024FWN4	61.0839	Non-Disordered						UMAG_00042	70.737	Non-Disordered		A0A507CZ93	64.3856	Non-Disordered
PBTT_09928	71.0841	Non-Disordered		A0A0H5RKF1	52.0691	Non-Disordered		poly_jg2677.t1	52.6617	Non-Disordered		A0A024GW23	61.0555	Disordered						UMAG_03977	70.683	Disordered		A0A507DE83	64.3347	Non-Disordered
PBTT_03352	70.944	Non-Disordered		A0A0H5REW0	52.021	Disordered		poly_jg1597.t1	52.5842	Non-Disordered		A0A024GB83	60.8195	Non-Disordered						UMAG_00365	70.631	Disordered		A0A507CHR3	64.2399	Non-Disordered
PBTT_04952	70.9155	Non-Disordered		A0A0H5QIT6	52.0126	Non-Disordered		poly_jg3882.t1	52.5225	Disordered		A0A024GTJ7	60.7323	Non-Disordered						UMAG_12330	70.057	Non-Disordered		A0A507C143	64.1894	Disordered
PBTT_08801	70.8148	Non-Disordered		A0A0H5R6L9	51.9272	Non-Disordered		poly_jg9569.t1	52.5025	Non-Disordered		A0A024GVW8	60.6943	Disordered						UMAG_01038	69.655	Non-Disordered		A0A507D3F0	64.1593	Non-Disordered
PBTT_01315	70.7899	Non-Disordered		A0A0H5QP45	51.766	Disordered		poly_jg398.t1	52.4952	Non-Disordered		A0A024FT70	60.3591	Disordered						UMAG_04422	69.625	Disordered		A0A507CWG8	64.1143	Non-Disordered
PBTT_08079	70.7743	Non-Disordered		A0A0H5REC6	51.6962	Disordered		poly_jg6144.t1	52.445	Non-Disordered		A0A024GVX2	60.2307	Disordered						UMAG_11464	69.503	Disordered		A0A507CN73	63.9271	Non-Disordered
PBTT_10077	70.6856	Non-Disordered		A0A0H5QY10	51.6181	Non-Disordered		poly_jg1223.t1	52.3259	Non-Disordered		A0A024FUC2	60.0503	Non-Disordered						UMAG_05927	69.453	Non-Disordered		A0A507CAM2	63.8234	Non-Disordered
PBTT_04220	70.6791	Disordered		A0A0H5QZ61	51.6135	Non-Disordered		poly_jg4344.t1	52.2829	Non-Disordered		A0A024GFQ1	59.8952	Disordered						UMAG_04818	69.444	Non-Disordered		A0A507CYE0	63.7749	Non-Disordered
PBTT_02549	70.6304	Non-Disordered		A0A0H5R4Q0	51.5885	Disordered		poly_jg3902.t1	52.254	Non-Disordered		A0A024FX15	59.8475	Disordered						UMAG_05222	69.42	Non-Disordered		A0A507CQS0	63.7578	Non-Disordered
PBTT_02991	70.5483	Non-Disordered		A0A0H5QP02	51.5497	Disordered		poly_jg4577.t1	52.1781	Non-Disordered		A0A024GU39	59.3359	Non-Disordered						UMAG_11940	69.179	Disordered		A0A507DDD0	63.6798	Non-Disordered
PBTT_04384	70.5091	Non-Disordered		A0A0H5RCG4	51.4517	Disordered		poly_jg3982.t1	52.1721	Non-Disordered		A0A024GBB3	59.1726	Disordered						UMAG_00628	69.159	Non-Disordered		A0A507CJC1	63.5934	Non-Disordered
PBTT_02547	70.4609	Non-Disordered		A0A0H5QY96	51.4138	Non-Disordered		poly_jg4456.t1	52.1467	Non-Disordered		A0A024GGA2	59.0973	Non-Disordered						UMAG_00567	69.152	Non-Disordered		A0A507D3N2	63.5847	Non-Disordered
PBTT_07520	70.4176	Non-Disordered		A0A0H5QYB0	50.9436	Non-Disordered		poly_jg1393.t1	52.087	Non-Disordered		A0A024GLE3	58.9737	Non-Disordered						UMAG_00265	69.042	Disordered		A0A507CZW7	63.4159	Non-Disordered
PBTT_08805	70.0591	Non-Disordered		A0A0H5QSY8	50.8472	Non-Disordered		poly_jg2727.t1	52.0739	Disordered		A0A024FTA4	58.8468	Non-Disordered						UMAG_01940	68.973	Disordered		A0A507CRK4	63.3727	Non-Disordered
PBTT_08512	69.8929	Non-Disordered		A0A0H5R468	50.6541	Non-Disordered		poly_jg9765.t1	51.9568	Non-Disordered		A0A024FV33	58.7573	Non-Disordered						UMAG_01240	68.958	Non-Disordered		A0A507D008	63.326	Non-Disordered
PBTT_00743	69.88	Non-Disordered		A0A0H5QYW1	50.6046	Non-Disordered		poly_jg6288.t1	51.9471	Non-Disordered		A0A024FY67	58.6704	Non-Disordered						UMAG_04649	68.807	Non-Disordered		A0A507D537	63.3067	Disordered
PBTT_07480	69.7588	Non-Disordered		A0A0H5QYA0	50.2908	Non-Disordered		poly_jg4818.t1	51.8783	Non-Disordered		A0A024G1E5	58.4835	Disordered						UMAG_12263	68.705	Non-Disordered		A0A507CSP7	63.2753	Non-Disordered
PBTT_05849	69.5493	Non-Disordered		A0A0H5REK5	50.2442	#N/A		poly_jg4587.t1	51.7147	Non-Disordered		A0A024FWF9	58.3779	Disordered						UMAG_12184	68.704	Disordered		A0A507C7W5	63.2286	Non-Disordered
PBTT_09269	69.5473	Non-Disordered		A0A0H5QYY0	50.1423	Non-Disordered		poly_jg6357.t1	51.6917	Non-Disordered		A0A024G4E9	58.3294	Non-Disordered						UMAG_04508	68.585	Disordered		A0A507CZN6	63.1299	Non-Disordered
PBTT_03952	69.5442	Non-Disordered		A0A0H5RU26	50.0592	Disordered		poly_jg2048.t1	51.6653	Non-Disordered		A0A024G5Y8	58.3163	Disordered						UMAG_01210	68.507	Disordered		A0A507D2E3	63.0694	Non-Disordered
PBTT_10110	69.4225	Non-Disordered		A0A0H5QYZ5	49.9977	Non-Disordered		poly_jg247.t3	51.6626	Disordered		A0A024FX43	58.263	Non-Disordered						UMAG_02474	68.438	Non-Disordered		A0A507CWH9	63.0542	Disordered
PBTT_08511	69.3916	Disordered		A0A0H5QZ10	49.9602	Non-Disordered		poly_jg6358.t1	51.3359	Disordered		A0A024GLV0	58.1513	Non-Disordered						UMAG_11062	68.39	Non-Disordered		A0A507D7N5	62.9374	Non-Disordered
PBTT_04863	69.23	Non-Disordered		A0A0H5RWI1	49.9306	Disordered		poly_jg4224.t1	51.1171	Disordered		A0A024G6M5	58.0916	Disordered						UMAG_01632	68.326	Non-Disordered		A0A507CUR4	62.8579	Non-Disordered
PBTT_03081	69.1866	Non-Disordered		A0A0H5QYD9	49.8646	Non-Disordered		poly_jg8999.t1	50.9877	Non-Disordered		A0A024GAB1	57.7826	Disordered						UMAG_10274	68.294	Disordered		A0A507DTS3	62.7534	Disordered
PBTT_07264	68.9784	Non-Disordered		A0A0H5QYY6	49.7684	Non-Disordered		poly_jg448.t1	50.8803	Non-Disordered		A0A024FTG5	57.3917	Non-Disordered						UMAG_02298	68.24	Non-Disordered		A0A507CRA0	62.7064	Non-Disordered
PBTT_07834	68.9318	Non-Disordered		A0A0H5R260	49.7468	Non-Disordered		poly_jg6168.t1	50.8703	Non-Disordered		A0A024GDQ3	57.1053	Disordered						UMAG_01238	68.188	Non-Disordered		A0A507CKT4	62.5613	Non-Disordered
PBTT_08039	68.7512	Non-Disordered		A0A0H5REB2	49.7278	Non-Disordered		poly_jg8809.t1	50.8097	Non-Disordered		A0A024GPN3	56.9161	Non-Disordered						UMAG_01823	67.641	Non-Disordered		A0A507CPF3	62.5494	Non-Disordered
PBTT_06614	68.7498	Non-Disordered		A0A0H5QXH1	49.5783	Non-Disordered		poly_jg460.t1	50.7577	Non-Disordered		A0A024GHZ6	56.8364	Non-Disordered						UMAG_KIS70462.1	67.317	Non-Disordered		A0A507CY17	62.5399	Non-Disordered
PBTT_09477	68.6186	Non-Disordered		A0A0H5QYW6	49.5646	Non-Disordered		poly_jg4888.t1	50.6869	Non-Disordered		A0A024G4N2	56.8231	Non-Disordered						UMAG_10208	67.178	Disordered		A0A507CCF9	62.3282	Non-Disordered
PBTT_07054	68.3145	Disordered		A0A0H5QYB9	49.5495	Non-Disordered		poly_jg4071.t1	50.6627	Non-Disordered		A0A024GEV3	56.7038	Disordered						UMAG_12127	67.174	Non-Disordered		A0A507CE13	62.1916	Disordered
PBTT_04688	68.3047	Non-Disordered		A0A0H5R1N6	49.4775	Non-Disordered		poly_jg9786.t1	50.6216	Disordered		A0A024GMD4	56.5246	Non-Disordered						UMAG_05306	67.152	Non-Disordered		A0A507CGX0	62.1235	Non-Disordered
PBTT_06561	68.2523	Non-Disordered		A0A0H5QY44	49.4605	Non-Disordered		poly_jg7891.t1	50.5408	Non-Disordered		A0A024GGW0	56.4204	Non-Disordered						UMAG_01808	67.09	Non-Disordered		A0A507DD77	62.0954	Disordered
PBTT_09508	68.221	Non-Disordered		A0A0H5QZ45	49.3652	Non-Disordered		poly_jg3617.t1	50.5042	Non-Disordered		A0A024GEH7	56.3135	Disordered						UMAG_10756	67.004	Disordered		A0A507D7P3	62.027	Non-Disordered
PBTT_01001	68.2047	Disordered		A0A0H5REC2	48.8933	Non-Disordered		poly_jg7971.t1	50.4558	Non-Disordered		A0A024GR22	56.2834	Non-Disordered						UMAG_05311	66.862	Non-Disordered		A0A507D2V4	61.8109	Non-Disordered
PBTT_06601	68.1009	Non-Disordered		A0A0H5RPQ7	48.8289	Non-Disordered		poly_jg1946.t1	50.4549	Disordered		A0A024FTI9	56.2822	Non-Disordered						UMAG_02293	66.687	Non-Disordered		A0A507BT98	61.7062	Non-Disordered
PBTT_06328	67.9861	Non-Disordered		A0A0H5RFF9	48.6444	Disordered		poly_jg5277.t1	50.4087	Non-Disordered		A0A024GBH9	56.2408	Disordered						UMAG_02193	66.607	Non-Disordered		A0A507C8K6	61.6887	Non-Disordered
PBTT_05690	67.9006	Non-Disordered		A0A0H5RT21	48.6273	Non-Disordered		poly_jg1774.t1	50.1642	Non-Disordered		A0A024G407	55.846	Disordered						UMAG_01499	66.575	Disordered		A0A507CIC9	61.6269	Non-Disordered
PBTT_10386	67.7782	Non-Disordered		A0A0H5RBZ1	48.6113	Disordered		poly_jg2343.t1	50.09	Non-Disordered		A0A024G5K1	55.8032	Disordered						UMAG_11243	66.569	Disordered		A0A507CN41	61.6146	Non-Disordered
PBTT_06372	67.7409	Non-Disordered		A0A0H5R0D7	48.5045	Non-Disordered		poly_jg9603.t1	50.075	Non-Disordered		A0A024GLP3	55.7824	Non-Disordered						UMAG_02194	66.56	Disordered		A0A507DDU1	61.4778	Non-Disordered
PBTT_02281	67.7089	Non-Disordered		A0A0H5QQ38	48.4354	Non-Disordered		poly_jg9589.t1	49.9424	Non-Disordered		A0A024FV87	55.6355	Non-Disordered						UMAG_04368	66.531	Disordered		A0A507CZE8	61.4718	Non-Disordered
PBTT_03670	67.6992	Disordered		A0A0H5RAT1	48.3263	Disordered		poly_jg9977.t1	49.7685	Non-Disordered		A0A024GSL4	55.5598	Disordered						UMAG_01377	66.395	Disordered		A0A507C5F5	61.4518	Non-Disordered
PBTT_09024	67.6193	Non-Disordered		A0A0H5QXL5	48.3124	Non-Disordered		poly_jg4082.t2	49.5908	Non-Disordered		A0A024GD53	55.5149	Disordered						UMAG_01234	66.395	Non-Disordered		A0A507D819	61.4043	Non-Disordered
PBTT_06035	67.4617	Non-Disordered		A0A0H5RCV3	48.2002	Disordered		poly_jg4029.t1	49.5701	Non-Disordered		A0A024FU69	55.4968	Disordered						UMAG_03422	66.354	Non-Disordered		A0A507CIF3	61.2655	Non-Disordered
PBTT_08826	67.428	Non-Disordered		A0A0H5RDG2	48.0974	Non-Disordered		poly_jg7979.t1	49.4885	Non-Disordered		A0A024GLB4	55.4553	Disordered						UMAG_01844	66.276	Non-Disordered		A0A507D4I9	61.265	Non-Disordered
PBTT_09172	67.4059	Non-Disordered		A0A0H5REY1	47.9977	Disordered		poly_jg10015.t1	49.4704	Non-Disordered		A0A024G4Q8	55.3978	Disordered						UMAG_05495	66.251	Disordered		A0A507CF97	61.1939	Disordered
PBTT_05267	67.3141	Non-Disordered		A0A0H5QY58	47.8248	Non-Disordered		poly_jg8601.t1	49.4314	Non-Disordered		A0A024GL30	55.2382	Non-Disordered						UMAG_04650	66.081	Non-Disordered		A0A507D256	61.0716	Non-Disordered
PBTT_00258	67.2779	Non-Disordered		A0A0H5RDL3	47.8179	Non-Disordered		poly_jg6711.t1	49.2393	Disordered		A0A024GPB5	55.1945	Non-Disordered						UMAG_KIS69603.1	65.984	Disordered		A0A507CIF6	60.8574	Non-Disordered
PBTT_00060	67.177	Non-Disordered		A0A0H5QZS9	47.7627	Non-Disordered		poly_jg9679.t1	49.21	Non-Disordered		A0A024GRW0	55.1928	Non-Disordered						UMAG_01239	65.975	Non-Disordered		A0A507DHB3	60.7355	Non-Disordered
PBTT_00629	67.1711	Non-Disordered		A0A0H5QY48	47.7472	Non-Disordered		poly_jg208.t1	49.2061	Disordered		A0A024FU00	55.1785	Non-Disordered						UMAG_02080	65.232	Disordered		A0A507CQR6	60.7339	Non-Disordered
PBTT_09739	67.1455	Disordered		A0A0H5RD42	47.496	Non-Disordered		poly_jg8334.t1	49.1304	Non-Disordered		A0A024GC50	55.1141	Non-Disordered						UMAG_01977	65.177	Disordered		A0A507DGM1	59.9255	Non-Disordered
PBTT_04507	67.0276	Non-Disordered		A0A0H5RG13	47.4492	Disordered		poly_jg1037.t1	48.9997	Non-Disordered		A0A024GIH3	54.8916	Disordered						UMAG_KIS69606.1	64.928	Non-Disordered		A0A507CMA2	59.741	Non-Disordered
PBTT_07463	66.9486	Non-Disordered		A0A0H5RAK1	47.3803	Non-Disordered		poly_jg6076.t1	48.9971	Non-Disordered		A0A024FT84	54.6435	Non-Disordered						UMAG_02295	64.738	Non-Disordered		A0A507D8E8	59.4619	Non-Disordered
PBTT_10447	66.9222	Disordered		A0A0H5RCM9	47.3388	Non-Disordered		poly_jg3600.t1	48.9436	Disordered		A0A024GIA9	54.5806	Disordered						UMAG_01235	64.582	Non-Disordered		A0A507CB62	59.4511	Non-Disordered
PBTT_06387	66.8898	Disordered		A0A0H5QQ03	47.2097	Non-Disordered		poly_jg9465.t2	48.893	Non-Disordered		A0A024GVN8	54.3316	Non-Disordered						UMAG_10115	64.426	Non-Disordered		A0A507CNJ3	59.24	Non-Disordered
PBTT_08636	66.7901	Non-Disordered		A0A0H5QP76	46.8526	Non-Disordered		poly_jg9872.t1	48.8778	Non-Disordered		A0A024FVU8	54.3294	Disordered						UMAG_KIS70631.1	64.356	Disordered		A0A507CK35	59.1141	Non-Disordered
PBTT_03986	66.7863	Disordered		A0A0H5RFH1	46.5535	Non-Disordered		poly_jg9233.t1	48.695	Non-Disordered		A0A024GFI7	54.2935	Non-Disordered						UMAG_11403	64.252	Non-Disordered		A0A507CX90	59.0549	Non-Disordered
PBTT_06859	66.4273	Non-Disordered		A0A0H5QFS7	46.4882	Non-Disordered		poly_jg3856.t1	48.6823	Disordered		A0A024FV25	54.2577	Non-Disordered						UMAG_11183	64.135	Non-Disordered		A0A507DC94	59.0328	Non-Disordered
PBTT_02551	66.4176	Non-Disordered		A0A0H5QYA5	46.4335	Non-Disordered		poly_jg7126.t1	48.6357	Disordered		A0A024GLZ4	54.2333	Disordered						UMAG_00891	63.979	Non-Disordered		A0A507CCX2	58.6567	Non-Disordered
PBTT_07603	66.2725	Non-Disordered		A0A0H5RJE9	46.3537	Disordered		poly_jg5815.t1	48.5006	Non-Disordered		A0A024GEM1	54.1825	Disordered						UMAG_02239	63.686	Disordered		A0A507C7X5	58.6238	Disordered
PBTT_08087	66.1914	Non-Disordered		A0A0H5R3C6	46.243	Non-Disordered		poly_jg8799.t1	48.4464	Disordered		A0A024FWH0	53.9718	Non-Disordered						UMAG_01237	63.513	Non-Disordered		A0A507D938	58.5568	Non-Disordered
PBTT_09059	66.0302	Non-Disordered		A0A0H5QKW4	46.1967	Non-Disordered		poly_jg9866.t1	48.4398	Non-Disordered		A0A024GEU5	53.901	Non-Disordered						UMAG_KIS69600.1	62.796	Non-Disordered		A0A507CGT2	58.516	Disordered
PBTT_01311	65.9224	Non-Disordered		A0A0H5R4E1	46.1855	Disordered		poly_jg9433.t1	48.436	Non-Disordered		A0A024G1C5	53.8575	Disordered						UMAG_02821	62.61	Non-Disordered		A0A507CZI5	58.4952	Non-Disordered
PBTT_02007	65.8842	Disordered		A0A0H5R2H6	46.165	Non-Disordered		poly_jg3926.t1	48.3586	Disordered		A0A024GE80	53.831	Non-Disordered						UMAG_03532	62.574	Non-Disordered		A0A507DGG0	58.1941	Non-Disordered
PBTT_07308	65.876	Non-Disordered		A0A0H5QHM2	46.1405	Non-Disordered		poly_jg3834.t2	48.3191	Non-Disordered		A0A024FXM0	53.6798	Disordered						UMAG_04343	62.334	Disordered		A0A507CX08	58.182	Non-Disordered
PBTT_09582	65.7735	Non-Disordered		A0A0H5RFH5	45.8565	Non-Disordered		poly_jg8835.t1	48.2603	Non-Disordered		A0A024FV73	53.6442	Non-Disordered						UMAG_KIS71480.1	62.326	Non-Disordered		A0A507BSV9	58.1489	Non-Disordered
PBTT_02601	65.7731	Non-Disordered		A0A0H5RD56	45.8318	Non-Disordered		poly_jg4082.t1	48.2243	Non-Disordered		A0A024GHJ8	53.5591	Non-Disordered						UMAG_KIS70824.1	62.115	Disordered		A0A507CWB2	58.1021	Non-Disordered
PBTT_04958	65.7716	Non-Disordered		A0A0H5QZD3	45.5289	Non-Disordered		poly_jg663.t1	48.1693	Non-Disordered		A0A024GDN4	53.4428	Disordered						UMAG_03746	62.105	Non-Disordered		A0A507D0U3	58.0905	Non-Disordered
PBTT_08084	65.7408	Non-Disordered		A0A0H5R1R4	45.4614	Non-Disordered		poly_jg7898.t1	48.1585	Non-Disordered		A0A024GUT2	53.3807	Non-Disordered						UMAG_02299	62.03	Non-Disordered		A0A507CL57	58.0865	Non-Disordered
PBTT_02639	65.5231	Non-Disordered		A0A0H5QR33	45.3294	Disordered		poly_jg2327.t1	48.1151	Non-Disordered		A0A024GHX6	53.3384	Non-Disordered						UMAG_02533	62.024	Disordered		A0A507CGA0	58.0591	Non-Disordered
PBTT_02684	65.4804	Non-Disordered		A0A0H5QWC6	45.316	Non-Disordered		poly_jg9.t1	48.113	Non-Disordered		A0A024GUB0	53.1246	Disordered						UMAG_03747	61.905	Non-Disordered		A0A507DDA0	57.7443	Non-Disordered
PBTT_04113	65.4187	Non-Disordered		A0A0H5QL79	45.1914	Non-Disordered		poly_jg1493.t1	48.0368	Non-Disordered		A0A024GGF7	53.0816	Non-Disordered						UMAG_03586	61.865	Disordered		A0A507D241	57.7282	Non-Disordered
PBTT_04025	65.3705	Disordered		A0A0H5R399	45.1222	Non-Disordered		poly_jg367.t1	48.0243	Non-Disordered		A0A024GJW4	52.9975	Disordered						UMAG_KIS67868.1	61.708	Non-Disordered		A0A507CU95	57.6051	Disordered
PBTT_08985	65.3237	Non-Disordered		A0A0H5RFR4	44.8974	Non-Disordered		poly_jg1526.t1	48.0238	Non-Disordered		A0A024FWJ6	52.7315	Non-Disordered						UMAG_KIS68746.1	61.671	Non-Disordered		A0A507D7U7	57.5927	Non-Disordered
PBTT_10247	65.0873	Non-Disordered		A0A0H5RDJ2	44.8757	Disordered		poly_jg686.t1	47.964	Disordered		A0A024GS87	52.4821	Non-Disordered						UMAG_02296	61.621	Non-Disordered		A0A507CL08	57.4203	Disordered
PBTT_04548	65.0673	Disordered		A0A0H5RBX4	44.7693	Disordered		poly_jg3440.t1	47.8162	Non-Disordered		A0A024FY95	52.2705	Non-Disordered						UMAG_00187	61.457	Non-Disordered		A0A507CH94	57.3919	Non-Disordered
PBTT_07764	65.0388	Non-Disordered		A0A0H5QU31	44.3792	Non-Disordered		poly_jg9674.t2	47.7917	Disordered		A0A024FT53	52.202	Disordered						UMAG_03397	61.409	Non-Disordered		A0A507CT99	57.2273	Non-Disordered
PBTT_03801	64.9637	Non-Disordered		A0A0H5QUG9	44.3534	Non-Disordered		poly_jg6134.t1	47.7025	Non-Disordered		A0A024GSL0	52.1503	Disordered						UMAG_05308	60.746	Non-Disordered		A0A507D4R9	57.2107	Disordered
PBTT_07088	64.8897	Non-Disordered		A0A0H5R6M1	44.2963	Non-Disordered		poly_jg1116.t1	47.6942	Disordered		A0A024GLP1	51.8273	Disordered						UMAG_04531	60.7	Disordered		A0A507CJG7	57.1874	Non-Disordered
PBTT_09025	64.8416	#N/A		A0A0H5QXG7	44.2555	Non-Disordered		poly_jg2114.t1	47.6938	Non-Disordered		A0A024FW47	51.5518	Non-Disordered						UMAG_11211	60.687	Disordered		A0A507DDI6	57.0887	Disordered
PBTT_08083	64.6222	Non-Disordered		A0A0H5QS52	44.2374	Non-Disordered		poly_jg437.t1	47.6619	Non-Disordered		A0A024GMM1	51.1688	Non-Disordered						UMAG_03065	60.629	Non-Disordered		A0A507CLP1	57.0653	Non-Disordered
PBTT_07423	64.6075	Non-Disordered		A0A0H5QUJ8	44.1208	Non-Disordered		poly_jg2565.t1	47.6109	Disordered		A0A024GCW9	51.1339	Disordered						UMAG_00715	60.555	Non-Disordered		A0A507DBF1	57.058	Non-Disordered
PBTT_09394	64.3589	Non-Disordered		A0A0H5QFG6	43.9909	Disordered		poly_jg887.t1	47.5966	Non-Disordered		A0A024G2E1	51.0586	Non-Disordered						UMAG_00097	60.351	Non-Disordered		A0A507D1N8	57.0323	Non-Disordered
PBTT_07622	64.1918	Non-Disordered		A0A0H5R3A9	43.9704	Non-Disordered		poly_jg4233.t1	47.5484	Non-Disordered		A0A024GU79	50.6979	Non-Disordered						UMAG_KIS69605.1	60.318	Disordered		A0A507CHI3	56.9644	Non-Disordered
PBTT_01937	64.1323	Non-Disordered		A0A0H5R3I9	43.8943	Non-Disordered		poly_jg227.t1	47.5233	Non-Disordered		A0A024GK00	50.2514	Disordered						UMAG_04040	60.3	Disordered		A0A507CCP9	56.9631	Disordered
PBTT_04600	63.9159	Non-Disordered		A0A0H5R4C4	43.8245	Non-Disordered		poly_jg1314.t1	47.5067	Disordered		A0A024G7I0	49.8836	Disordered						UMAG_KIS67333.1	60.212	Non-Disordered		A0A507CBP2	56.8193	Non-Disordered
PBTT_03664	63.9045	Non-Disordered		A0A0H5R2I9	43.6648	Non-Disordered		poly_jg10174.t1	47.5041	Non-Disordered		A0A024GQM2	49.8385	Non-Disordered						UMAG_11538	60.083	Non-Disordered		A0A507CNE1	56.7509	Non-Disordered
PBTT_08449	63.8925	Non-Disordered		A0A0H5R3E2	43.6467	Non-Disordered		poly_jg9674.t1	47.4961	Disordered		A0A024GBE7	49.8182	Non-Disordered						UMAG_00629	59.152	Disordered		A0A507CUU0	56.6874	Non-Disordered
PBTT_01979	63.7121	Non-Disordered		A0A0H5RE19	43.5354	Non-Disordered		poly_jg781.t1	47.4492	Non-Disordered		A0A024GLJ8	49.4889	Non-Disordered						UMAG_01236	59.079	Non-Disordered		A0A507DH90	56.6704	Non-Disordered
PBTT_02939	63.5923	Non-Disordered		A0A0H5QQ93	43.5017	Disordered		poly_jg7385.t1	47.4201	Non-Disordered		A0A024GFE0	48.9032	Disordered						UMAG_12264	59.015	Non-Disordered		A0A507CKU2	56.3456	Disordered
PBTT_09408	63.5272	Non-Disordered		A0A0H5QY30	43.4482	Non-Disordered		poly_jg4248.t1	47.4171	Non-Disordered		A0A024GKS2	48.5361	Non-Disordered						UMAG_11484	58.879	Non-Disordered		A0A507BSV1	56.315	Disordered
PBTT_09666	63.216	Non-Disordered		A0A0H5QG66	43.2208	Non-Disordered		poly_jg12.t1	47.3057	Non-Disordered		A0A024G9C9	48.2912	Non-Disordered						UMAG_KIS69601.1	58.542	Non-Disordered		A0A507D5H4	56.2469	Disordered
PBTT_06870	63.1754	Non-Disordered		A0A0H5RI91	43.1137	Non-Disordered		poly_jg4635.t1	47.2802	Non-Disordered		A0A024FT55	48.2584	Non-Disordered						UMAG_05824	58.178	Disordered		A0A507D3X1	56.2115	Disordered
PBTT_02696	63.1291	Non-Disordered		A0A0H5QH92	43.0929	Disordered		poly_jg4084.t1	47.2449	Non-Disordered		A0A024GAA7	48.0569	Non-Disordered						UMAG_03650	58.17	Non-Disordered		A0A507CRY3	56.1423	Non-Disordered
PBTT_03121	63.0152	Non-Disordered		A0A0H5R2S8	42.8104	Non-Disordered		poly_jg4692.t1	47.2382	Disordered		A0A024FVP5	48.0352	Disordered						UMAG_00060	57.91	Non-Disordered		A0A507D6E0	56.1279	Non-Disordered
PBTT_08766	62.577	Disordered		A0A0H5R864	42.7604	Disordered		poly_jg9844.t1	47.1363	Disordered		A0A024FT11	47.8174	Disordered						UMAG_06113	57.753	Non-Disordered		A0A507DD24	56.1266	Non-Disordered
PBTT_09224	62.3741	Non-Disordered		A0A0H5R3P9	42.7062	Non-Disordered		poly_jg9340.t1	47.124	Non-Disordered		A0A024GL78	47.7989	Non-Disordered						UMAG_00344	57.611	Disordered		A0A507DDI4	55.984	Non-Disordered
PBTT_05573	62.3071	Non-Disordered		A0A0H5RI86	42.4298	Non-Disordered		poly_jg4024.t1	47.1067	Non-Disordered		A0A024GM57	47.6196	Non-Disordered						UMAG_03105	57.487	Disordered		A0A507CJZ5	55.9563	Disordered
PBTT_10381	62.2523	Non-Disordered		A0A0H5RVZ7	42.3853	Non-Disordered		poly_jg5219.t1	47.0258	Non-Disordered		A0A024GU14	47.5824	Non-Disordered						UMAG_10972	57.34	Non-Disordered		A0A507DDZ3	55.7801	Non-Disordered
PBTT_04741	61.6769	Disordered		A0A0H5QGG9	42.2703	Non-Disordered		poly_jg6101.t1	47.0153	Non-Disordered		A0A024FX73	47.1982	Non-Disordered						UMAG_00171	57.152	Disordered		A0A507CH16	55.7198	Non-Disordered
PBTT_03955	61.425	Non-Disordered		A0A0H5RF09	42.1391	Non-Disordered		poly_jg9565.t1	46.9168	Non-Disordered		A0A024FUD8	47.1758	Non-Disordered						UMAG_03707	56.53	Non-Disordered		A0A507CNI1	55.5595	Disordered
PBTT_07805	61.4098	Non-Disordered		A0A0H5R4L4	41.983	Disordered		poly_jg3830.t1	46.8586	Non-Disordered		A0A024GHM9	47.0653	Disordered						UMAG_06359	56.246	Disordered		A0A507D3H2	55.5468	Non-Disordered
PBTT_06314	61.2636	Non-Disordered		A0A0H5RAI4	41.7998	Non-Disordered		poly_jg8085.t1	46.7835	Disordered		A0A024GUF2	47.0023	Disordered						UMAG_KIS69604.1	56.042	Disordered		A0A507CXR1	55.4892	Non-Disordered
PBTT_08300	61.2498	Disordered		A0A0H5QRD1	41.7834	Non-Disordered		poly_jg7111.t1	46.6472	Non-Disordered		A0A024FWM6	46.9906	Non-Disordered						UMAG_06222	55.836	Disordered		A0A507CLF2	55.4696	Disordered
PBTT_05131	61.1546	Non-Disordered		A0A0H5R2H2	41.7775	Non-Disordered		poly_jg5098.t1	46.581	Non-Disordered		A0A024GHA6	46.974	Non-Disordered						UMAG_05589	55.533	Disordered		A0A507CH84	55.3974	Disordered
PBTT_08752	61.1205	Disordered		A0A0H5RVT4	41.7125	Disordered		poly_jg780.t1	46.5723	Non-Disordered		A0A024FTY2	46.8447	Non-Disordered						UMAG_00104	55.5	Disordered		A0A507CUV8	55.3498	Non-Disordered
PBTT_07435	60.9434	Non-Disordered		A0A0H5R3J5	41.6989	Non-Disordered		poly_jg2716.t1	46.5291	Non-Disordered		A0A024FWR8	46.7473	Non-Disordered						UMAG_10202	55.482	Disordered		A0A507DCE2	55.3243	Non-Disordered
PBTT_01791	60.8803	Non-Disordered		A0A0H5R3M9	41.6466	Non-Disordered		poly_jg6020.t1	46.4241	Disordered		A0A024FUA8	46.7247	Non-Disordered						UMAG_05583	55.471	Disordered		A0A507D9Q9	55.2778	Non-Disordered
PBTT_03831	60.7226	Non-Disordered		A0A0H5QWT8	41.5765	Non-Disordered		poly_jg5740.t1	46.3534	Disordered		A0A024FVE4	46.6717	Disordered						UMAG_04248	55.47	Disordered		A0A507DC78	54.9892	Non-Disordered
PBTT_02698	60.6798	Non-Disordered		A0A0H5R3S3	41.3037	Non-Disordered		poly_jg2212.t1	46.3382	Disordered		A0A024FWY6	46.6391	Non-Disordered						UMAG_11628	55.363	Disordered		A0A507CSI0	54.9115	Disordered
PBTT_03694	60.666	Non-Disordered		A0A0H5R969	41.2912	Non-Disordered		poly_jg6250.t1	46.1931	Disordered		A0A024GDE5	46.5236	Disordered						UMAG_06141	54.809	Disordered		A0A507DHJ3	54.9005	Non-Disordered
PBTT_10043	60.6454	Disordered		A0A0H5QVG5	41.2409	Non-Disordered		poly_jg5380.t1	46.192	Non-Disordered		A0A024FT41	46.5067	Non-Disordered						UMAG_10067	54.78	Non-Disordered		A0A507CWG4	54.8103	Non-Disordered
PBTT_10139	60.566	Non-Disordered		A0A0H5R4V8	40.9226	Non-Disordered		poly_jg8503.t1	46.1475	Non-Disordered		A0A024G3F0	46.2327	Non-Disordered						UMAG_01061	54.703	Non-Disordered		A0A507BXS4	54.5994	Non-Disordered
PBTT_08734	60.5526	Disordered		A0A0H5QV99	40.8391	Non-Disordered		poly_jg8017.t1	46.037	Non-Disordered		A0A024GGZ4	46.2142	Non-Disordered						UMAG_KIS68747.1	54.679	Disordered		A0A507CXW2	54.5576	Non-Disordered
PBTT_05190	60.4497	Non-Disordered		A0A0H5RJR8	40.5338	Non-Disordered		poly_jg7536.t1	46.0009	Non-Disordered		A0A024GT80	45.9487	Non-Disordered						UMAG_00538	54.404	Disordered		A0A507CQM3	54.5278	Non-Disordered
PBTT_08447	60.3311	Non-Disordered		A0A0H5R9N7	40.4592	Non-Disordered		poly_jg7876.t1	45.9128	Non-Disordered		A0A024GPK5	45.7798	Disordered						UMAG_04815	53.667	Disordered		A0A507CTM2	54.2387	Non-Disordered
PBTT_09308	60.2596	Disordered		A0A0H5QF18	40.182	Non-Disordered		poly_jg3569.t1	45.7296	Non-Disordered		A0A024GLY0	45.7792	Disordered						UMAG_05708	53.12	Disordered		A0A507CSX8	54.0672	Non-Disordered
PBTT_01336	60.1792	Non-Disordered		A0A0H5REI6	40.1183	Non-Disordered		poly_jg7464.t1	45.7293	Non-Disordered		A0A024GAK1	45.7285	Disordered						UMAG_10476	52.684	Non-Disordered		A0A507CWY0	53.9228	Disordered
PBTT_09883	60.1705	Non-Disordered		A0A0H5REP0	39.9076	Non-Disordered		poly_jg511.t1	45.6649	Non-Disordered		A0A024GQD5	45.6992	Non-Disordered						UMAG_KIS66036.1	52.525	Disordered		A0A507D360	53.9159	Non-Disordered
PBTT_06842	60.0255	Non-Disordered		A0A0H5QGU7	39.6161	Non-Disordered		poly_jg9565.t2	45.5634	Non-Disordered		A0A024FW20	45.6786	Disordered						UMAG_05799	52.436	Non-Disordered		A0A507BX94	53.8447	Non-Disordered
PBTT_09095	59.8898	Disordered		A0A0H5RG83	39.5248	Non-Disordered		poly_jg7874.t1	45.5472	Disordered		A0A024G5P6	45.5117	Non-Disordered						UMAG_03750	52.359	Non-Disordered		A0A507D3J0	53.7524	Non-Disordered
PBTT_02069	59.6638	Disordered		A0A0H5QJ85	39.3796	Non-Disordered		poly_jg446.t1	45.5192	Non-Disordered		A0A024GAA2	45.3261	Disordered						UMAG_12217	52.285	Non-Disordered		A0A507C398	53.6535	Non-Disordered
PBTT_06958	59.6183	Non-Disordered		A0A0H5QUY8	39.2888	Non-Disordered		poly_jg1453.t1	45.4878	Non-Disordered		A0A024GFR8	45.106	Disordered						UMAG_12281	52.258	Disordered		A0A507DA78	53.6058	Non-Disordered
PBTT_08749	59.5055	Disordered		A0A0H5R2M9	39.1636	Non-Disordered		poly_jg8965.t1	45.4618	Non-Disordered		A0A024FWT6	45.0159	Non-Disordered						UMAG_06221	52.005	Disordered		A0A507D3S0	53.5558	Non-Disordered
PBTT_01209	59.5044	Non-Disordered		A0A0H5QQZ1	39.1392	Non-Disordered		poly_jg9066.t1	45.4216	Non-Disordered		A0A024FX04	44.8028	Non-Disordered						UMAG_06060	51.895	Non-Disordered		A0A507D8Q6	53.116	Disordered
PBTT_08146	59.3225	Non-Disordered		A0A0H5QUJ5	39.0479	Disordered		poly_jg750.t1	45.3894	Non-Disordered		A0A024GAW6	44.3443	Non-Disordered						UMAG_06315	51.356	Disordered		A0A507CET2	52.8901	Non-Disordered
PBTT_05670	59.1808	Non-Disordered		A0A0H5RJC1	38.877	Non-Disordered		poly_jg9239.t1	45.3829	Non-Disordered		A0A024FTE6	44.2589	Disordered						UMAG_KIS69602.1	51.274	Disordered		A0A507CL21	52.8729	Disordered
PBTT_05694	59.0386	Disordered		A0A0H5QYD0	38.8395	Non-Disordered		poly_jg5964.t1	45.2411	Non-Disordered		A0A024G481	44.0422	Non-Disordered						UMAG_02466	51.187	Non-Disordered		A0A507DI88	52.7811	Disordered
PBTT_00641	59.0333	Non-Disordered		A0A0H5R7H0	38.34	Non-Disordered		poly_jg8412.t1	45.1356	Disordered		A0A024FUB0	43.7915	Non-Disordered						UMAG_10030	51	Disordered		A0A507C3K7	52.6208	Non-Disordered
PBTT_02402	58.896	Disordered		A0A0H5QTJ2	37.8104	Non-Disordered		poly_jg8957.t1	45.1259	Non-Disordered		A0A024G116	43.702	Disordered						UMAG_01513	50.484	Disordered		A0A507CUM6	52.5531	Disordered
PBTT_07203	58.8021	Non-Disordered		A0A0H5QKE5	37.7848	Non-Disordered		poly_jg9231.t1	44.9339	Non-Disordered		A0A024GJW6	43.3636	Non-Disordered						UMAG_10278	50.108	Non-Disordered		A0A507DDZ2	52.4838	Disordered
PBTT_04184	58.6674	Non-Disordered		A0A0H5QY90	37.6757	Disordered		poly_jg400.t1	44.8997	Non-Disordered		A0A024GKK9	43.3523	Non-Disordered						UMAG_03744	49.929	Disordered		A0A507CPK4	52.3159	Non-Disordered
PBTT_06959	58.665	Non-Disordered		A0A0H5RQ41	37.6655	Non-Disordered		poly_jg7193.t1	44.7737	Non-Disordered		A0A024G5G4	43.3262	Non-Disordered						UMAG_03745	49.919	Non-Disordered		A0A507D824	52.1644	Non-Disordered
PBTT_08747	58.4525	Disordered		A0A0H5QYI3	37.4325	Non-Disordered		poly_jg2314.t1	44.7604	Non-Disordered		A0A024GB56	43.2688	Non-Disordered						UMAG_03046	49.803	Non-Disordered		A0A507CQ81	52.0798	Non-Disordered
PBTT_09207	58.3523	Disordered		A0A0H5RIB8	37.2252	Non-Disordered		poly_jg5280.t1	44.7162	Non-Disordered		A0A024GGH1	43.2046	Disordered						UMAG_03822	49.646	Non-Disordered		A0A507CVE7	51.7335	Non-Disordered
PBTT_07958	58.1436	Non-Disordered		A0A0H5REB7	37.1619	Non-Disordered		poly_jg9461.t1	44.658	Non-Disordered		A0A024FXB0	43.1692	Non-Disordered						UMAG_11094	49.479	Non-Disordered		A0A507D5G2	51.5817	Non-Disordered
PBTT_06960	58.1202	Non-Disordered		A0A0H5RJX4	36.9834	Non-Disordered		poly_jg26.t1	44.513	Non-Disordered		A0A024GQP3	42.8553	Non-Disordered						UMAG_05341	48.899	Non-Disordered		A0A507DA26	51.5164	Disordered
PBTT_08001	57.9075	Disordered		A0A0H5RPF0	36.815	Non-Disordered		poly_jg5013.t2	44.4751	Non-Disordered		A0A024FYM8	42.648	Non-Disordered						UMAG_02011	48.508	Disordered		A0A507CPL9	51.4302	Non-Disordered
PBTT_03348	57.6915	Non-Disordered		A0A0H5QR85	36.521	Non-Disordered		poly_jg8981.t2	44.4705	Non-Disordered		A0A024G827	42.5305	Non-Disordered						UMAG_03138	48.357	Disordered		A0A507CDG9	51.4078	Non-Disordered
PBTT_01544	57.5524	Non-Disordered		A0A0H5QTZ8	36.3144	Non-Disordered		poly_jg9976.t1	44.4065	Non-Disordered		A0A024FW55	42.0018	Non-Disordered						UMAG_01734	48.25	Disordered		A0A507CEF9	51.3693	Non-Disordered
PBTT_08981	57.5276	Non-Disordered		A0A0H5RGF5	36.2895	Non-Disordered		poly_jg3952.t2	44.3724	Disordered		A0A024GAW5	41.9815	Disordered						UMAG_00466	47.968	Disordered		A0A507CEW5	51.3463	Disordered
PBTT_08890	57.5138	Disordered		A0A0H5REC5	36.1944	Non-Disordered		poly_jg2737.t1	44.3569	Disordered		A0A024FTN9	41.5151	Non-Disordered						UMAG_11988	47.843	Non-Disordered		A0A507BJ31	51.283	Disordered
PBTT_08735	57.3667	Disordered		A0A0H5QM60	36.0995	Non-Disordered		poly_jg6471.t1	44.3461	Disordered		A0A024GV69	41.3429	Non-Disordered						UMAG_10031	47.814	Disordered		A0A507D007	51.2483	Non-Disordered
PBTT_08726	57.3635	Disordered		A0A0H5RKC9	35.957	Non-Disordered		poly_jg92.t1	44.3445	Non-Disordered		A0A024GIC3	41.2596	Non-Disordered						UMAG_06064	47.538	Non-Disordered		A0A507C7Z3	51.2047	Disordered
PBTT_10159	57.3337	Non-Disordered		A0A0H5R598	35.8124	Non-Disordered		poly_jg3164.t1	44.2855	Disordered		A0A024FVK4	40.8876	Non-Disordered						UMAG_03327	46.524	Disordered		A0A507CGV3	51.1006	Non-Disordered
PBTT_06984	57.2406	Disordered		A0A0H5R5F0	35.6594	Non-Disordered		poly_jg5622.t1	44.1974	Non-Disordered		A0A024GS58	40.7722	Non-Disordered						UMAG_06223	46.428	Disordered		A0A507CNI9	50.8463	Non-Disordered
PBTT_09152	57.1733	Non-Disordered		A0A0H5QHN5	35.6299	Non-Disordered		poly_jg8920.t1	44.1957	Non-Disordered		A0A024FWM9	40.5481	Non-Disordered						UMAG_03154	45.86	Disordered		A0A507CZ81	50.8237	Disordered
PBTT_05912	57.1178	Disordered		A0A0H5QYB4	35.0509	Non-Disordered		poly_jg8882.t1	44.1138	Non-Disordered		A0A024FWS4	40.3735	Non-Disordered						UMAG_11910	45.599	Non-Disordered		A0A507BYS3	50.7801	Non-Disordered
PBTT_06518	57.097	Non-Disordered		A0A0H5QY53	34.9619	Non-Disordered		poly_jg1235.t1	44.0688	Non-Disordered		A0A024GDN2	40.3733	Disordered						UMAG_03274	45.261	Disordered		A0A507CQV2	50.7003	Non-Disordered
PBTT_08881	56.8184	Disordered		A0A0H5R2I1	34.8485	Non-Disordered		poly_jg3952.t1	44.0292	Disordered		A0A024GAQ8	40.2592	Disordered						UMAG_01779	44.875	Disordered		A0A507D1T7	50.6631	Disordered
PBTT_06304	56.7953	Non-Disordered		A0A0H5QHK1	34.8026	Non-Disordered		poly_jg9327.t1	44.0184	Non-Disordered		A0A024GAD3	39.9091	Non-Disordered						UMAG_02192	44.759	Non-Disordered		A0A507CG75	50.6026	Non-Disordered
PBTT_03410	56.7501	Disordered		A0A0H5QY84	34.7956	Non-Disordered		poly_jg4415.t1	43.9529	Disordered		A0A024FUL1	39.8718	Non-Disordered						UMAG_01334	44.729	Disordered		A0A507CP06	50.5411	Non-Disordered
PBTT_00502	56.7116	Disordered		A0A0H5QW53	34.6808	Disordered		poly_jg8141.t1	43.9172	Non-Disordered		A0A024GJF4	39.6073	Non-Disordered						UMAG_04033	44.535	Disordered		A0A507CWP6	50.527	Non-Disordered
PBTT_08241	56.4359	Disordered		A0A0H5QQ08	34.3019	Disordered		poly_jg196.t1	43.8241	Non-Disordered		A0A024GFJ8	39.5341	Non-Disordered						UMAG_04096	44.51	Non-Disordered		A0A507CYW0	50.459	Non-Disordered
PBTT_02469	56.3337	Non-Disordered		A0A0H5QM55	34.061	Non-Disordered		poly_jg9247.t1	43.8021	Non-Disordered		A0A024GNA4	39.5252	Non-Disordered						UMAG_01689	44.123	Disordered		A0A507CH73	50.4175	Disordered
PBTT_10126	56.278	Non-Disordered		A0A0H5QMP1	33.9087	Non-Disordered		poly_jg4886.t1	43.8019	Non-Disordered		A0A024FTG8	39.3797	Non-Disordered						UMAG_KIS65799.1	44.001	Disordered		A0A507CTZ4	50.3745	Non-Disordered
PBTT_02078	56.1744	Disordered		A0A0H5R7H9	33.3675	Non-Disordered		poly_jg662.t1	43.7659	Non-Disordered		A0A024FY14	38.7692	Non-Disordered						UMAG_11980	43.352	Non-Disordered		A0A507CXU7	50.1739	Non-Disordered
PBTT_06721	55.9751	Non-Disordered		A0A0H5R1T8	33.1911	Non-Disordered		poly_jg7762.t1	43.717	Disordered		A0A024GT39	38.5106	Non-Disordered						UMAG_11839	43.283	Disordered		A0A507DIV5	50.1005	Non-Disordered
PBTT_00535	55.9045	Non-Disordered		A0A0H5RNP1	32.9153	Non-Disordered		poly_jg8842.t1	43.6991	Non-Disordered		A0A024GLJ5	38.3107	Non-Disordered						UMAG_06248	42.883	Non-Disordered		A0A507DPE4	50.0914	Non-Disordered
PBTT_07507	55.7992	Disordered		A0A0H5RE08	32.7109	Disordered		poly_jg2280.t1	43.6732	Non-Disordered		A0A024FWT7	38.2183	Non-Disordered						UMAG_11397	42.72	Non-Disordered		A0A507CI90	50.0696	Non-Disordered
PBTT_07102	55.7916	Disordered		A0A0H5QIX9	32.6838	Non-Disordered		poly_jg5013.t1	43.5592	Non-Disordered		A0A024GVU2	38.2052	Non-Disordered						UMAG_00858	41.864	Non-Disordered		A0A507DAM9	49.9065	Disordered
PBTT_06866	55.6787	Non-Disordered		A0A0H5QJ60	32.657	Disordered		poly_jg6194.t2	43.405	Non-Disordered		A0A024FTA2	38.1346	Non-Disordered						UMAG_00781	41.847	Non-Disordered		A0A507D073	49.865	Non-Disordered
PBTT_07589	55.6498	Non-Disordered		A0A0H5R420	32.4683	Non-Disordered		poly_jg8519.t1	43.1065	Non-Disordered		A0A024GF68	37.8104	#N/A						UMAG_11639	41.711	Non-Disordered		A0A507D857	49.8547	Non-Disordered
PBTT_07143	55.5447	Non-Disordered		A0A0H5R721	32.2719	Disordered		poly_jg3546.t1	43.058	Disordered		A0A024GRA9	36.7584	Non-Disordered						UMAG_04698	41.125	Disordered		A0A507CXP9	49.8491	Non-Disordered
PBTT_05847	55.5224	Non-Disordered		A0A0H5R949	31.9204	Non-Disordered		poly_jg6537.t1	43.0379	Non-Disordered		A0A024GQ74	36.7141	Non-Disordered						UMAG_01778	40.965	Disordered		A0A507CVZ9	49.3986	Non-Disordered
PBTT_09387	55.481	Non-Disordered		A0A0H5QI62	31.2681	Disordered		poly_jg5830.t1	42.9997	Non-Disordered		A0A024G5Q4	36.6014	Non-Disordered						UMAG_04084	40.613	Disordered		A0A507CME2	49.3208	Disordered
PBTT_09342	55.3338	Non-Disordered		A0A0H5RWA1	31.0558	Non-Disordered		poly_jg6194.t1	42.9054	Non-Disordered		A0A024FXS1	36.5881	Non-Disordered						UMAG_06146	40.284	Non-Disordered		A0A507CQU2	49.2137	Disordered
PBTT_09139	55.1912	Non-Disordered		A0A0H5QV88	29.9508	Non-Disordered		poly_jg3102.t1	42.5197	Non-Disordered		A0A024FTM0	36.5197	Disordered						UMAG_02925	39.286	Disordered		A0A507D9Y2	49.186	Non-Disordered
PBTT_10204	55.159	Disordered		A0A0H5QV04	29.1333	Non-Disordered		poly_jg3549.t1	42.0441	Disordered		A0A024FWG0	36.4748	Non-Disordered						UMAG_06255	38.863	Disordered		A0A507CF74	49.042	Non-Disordered
PBTT_04130	55.0278	Disordered		A0A0H5QH51	28.5789	Disordered		poly_jg5209.t1	42.0433	Non-Disordered		A0A024G6U7	36.3716	Disordered						UMAG_03393	38.829	Non-Disordered		A0A507CAQ7	48.7945	Non-Disordered
PBTT_08107	54.9964	Non-Disordered		A0A0H5QYD4	27.3669	Disordered		poly_jg9323.t1	41.9997	Non-Disordered		A0A024FV47	36.2519	Non-Disordered						UMAG_00885	38.225	Non-Disordered		A0A507CJF4	48.7706	Disordered
PBTT_09383	54.9723	Disordered						poly_jg4197.t1	41.7215	Non-Disordered		A0A024FYJ1	35.8729	Non-Disordered						UMAG_02475	37.87	Disordered		A0A507DF55	48.7107	Non-Disordered
PBTT_01204	54.8587	Non-Disordered						poly_jg8975.t1	41.6926	Non-Disordered		A0A024G397	35.6051	Non-Disordered						UMAG_00664	37.258	Disordered		A0A507CN38	48.6799	Disordered
PBTT_01572	54.7227	Non-Disordered						poly_jg6612.t1	41.5339	Non-Disordered		A0A024G7Z5	35.2706	Disordered						UMAG_12238	35.312	Disordered		A0A507CIS8	48.4521	Non-Disordered
PBTT_08428	54.6237	Non-Disordered						poly_jg8839.t1	41.4321	Non-Disordered		A0A024G9K7	35.003	Non-Disordered						UMAG_12015	34.941	#N/A		A0A507DCK5	48.3587	Disordered
PBTT_04266	54.53	Disordered						poly_jg101.t1	41.4088	Non-Disordered		A0A024GHP0	34.7314	Non-Disordered						UMAG_00823	33.215	Non-Disordered		A0A507BS68	48.2652	Non-Disordered
PBTT_00639	54.4701	Disordered						poly_jg8981.t1	41.333	Non-Disordered		A0A024FTF8	34.6324	Disordered						UMAG_01132	33.199	Non-Disordered		A0A507DA58	48.1563	Non-Disordered
PBTT_09911	54.4022	Disordered						poly_jg9321.t1	41.0476	Non-Disordered		A0A024GRU6	34.2568	Non-Disordered						UMAG_02756	31.328	Non-Disordered		A0A507D5B9	48.0241	Non-Disordered
PBTT_05938	54.2787	Disordered						poly_jg8032.t2	41.032	Non-Disordered		A0A024FXH2	34.0887	Non-Disordered						UMAG_00420	30.68	Non-Disordered		A0A507DA00	47.7187	Non-Disordered
PBTT_01135	54.1715	Non-Disordered						poly_jg9347.t1	41.0054	Non-Disordered		A0A024FTI6	34.0255	Non-Disordered										A0A507CC90	47.7163	Non-Disordered
PBTT_07693	54.1379	Non-Disordered						poly_jg7977.t1	40.9855	Non-Disordered		A0A024GB17	33.6856	Non-Disordered										A0A507CZ44	47.6844	Non-Disordered
PBTT_08172	53.9966	Non-Disordered						poly_jg4151.t1	40.9621	Non-Disordered		A0A024FWK2	33.1511	Disordered										A0A507DA91	47.6067	Non-Disordered
PBTT_05930	53.9099	Disordered						poly_jg3908.t1	40.9555	Non-Disordered		A0A024GIW8	32.9933	Non-Disordered										A0A507DKC9	47.5397	Non-Disordered
PBTT_03380	53.883	Non-Disordered						poly_jg8032.t1	40.9051	Non-Disordered		A0A024GRP9	32.8256	Non-Disordered										A0A507CPC0	47.2895	Disordered
PBTT_04796	53.8512	Disordered						poly_jg9149.t1	40.8125	Non-Disordered		A0A024GVW1	32.8044	Non-Disordered										A0A507D1X6	47.1114	Disordered
PBTT_03957	53.7806	Disordered						poly_jg7553.t1	40.7828	Non-Disordered		A0A024G3U1	32.498	Non-Disordered										A0A507BQ27	47.067	Non-Disordered
PBTT_03431	53.7531	Disordered						poly_jg6290.t1	40.521	Non-Disordered		A0A024FTH7	31.1472	Non-Disordered										A0A507CYR6	47.0196	Non-Disordered
PBTT_07543	53.6908	Non-Disordered						poly_jg4385.t1	40.4754	Non-Disordered		A0A024GMI2	31.1374	Non-Disordered										A0A507CSB0	46.6607	Non-Disordered
PBTT_07041	53.6839	Non-Disordered						poly_jg3314.t1	40.4101	Non-Disordered		A0A024FWZ2	30.7119	Disordered										A0A507DBV0	46.5845	Non-Disordered
PBTT_04568	53.6766	Non-Disordered						poly_jg3649.t1	40.4032	Non-Disordered		A0A024FX07	29.7793	Non-Disordered										A0A507BX84	46.4431	Non-Disordered
PBTT_07468	53.5107	Non-Disordered						poly_jg2443.t1	40.3891	Non-Disordered		A0A024GE11	28.6455	Non-Disordered										A0A507DCU1	46.4132	Non-Disordered
PBTT_00121	53.4788	Disordered						poly_jg8333.t1	40.3832	Disordered														A0A507CZX0	46.378	Disordered
PBTT_09710	53.4414	Non-Disordered						poly_jg3691.t1	40.2577	Non-Disordered														A0A507CVA7	46.1505	Disordered
PBTT_00441	53.3193	Non-Disordered						poly_jg3628.t1	40.2197	Non-Disordered														A0A507D9K2	46.0948	Non-Disordered
PBTT_00612	53.1982	Non-Disordered						poly_jg2282.t1	40.094	Non-Disordered														A0A507CZ85	46.0514	Disordered
PBTT_04228	53.1827	Disordered						poly_jg8987.t1	40.0772	Non-Disordered														A0A507CMX2	46.0031	Non-Disordered
PBTT_02678	53.0261	Non-Disordered						poly_jg6193.t1	40.0556	Non-Disordered														A0A507CYA5	45.9377	Non-Disordered
PBTT_05116	53.0189	Non-Disordered						poly_jg9667.t1	40.0345	Non-Disordered														A0A507CLU8	45.6577	Disordered
PBTT_05495	52.833	Non-Disordered						poly_jg9232.t1	40.0239	Non-Disordered														A0A507C388	45.6079	Disordered
PBTT_08961	52.7977	Non-Disordered						poly_jg6228.t1	39.9823	Non-Disordered														A0A507CUT1	45.4787	Non-Disordered
PBTT_07457	52.7443	Non-Disordered						poly_jg9523.t1	39.8325	Non-Disordered														A0A507DJJ4	45.3967	Disordered
PBTT_08024	52.728	Disordered						poly_jg7865.t1	39.7147	Disordered														A0A507CLL5	45.3902	Non-Disordered
PBTT_03251	52.6135	Disordered						poly_jg9325.t1	39.7113	Non-Disordered														A0A507CRD1	45.1569	Disordered
PBTT_07348	52.6029	Non-Disordered						poly_jg4715.t1	39.5985	Non-Disordered														A0A507CTD2	45.1034	Disordered
PBTT_04961	52.5811	Disordered						poly_jg9149.t2	39.4531	Non-Disordered														A0A507C922	45.0459	Non-Disordered
PBTT_09247	52.5025	Non-Disordered						poly_jg13.t1	39.2175	Non-Disordered														A0A507CRN3	45.0048	Non-Disordered
PBTT_08082	52.4762	Disordered						poly_jg1327.t1	38.9521	Non-Disordered														A0A507C8S8	44.969	Non-Disordered
PBTT_06929	52.3508	Non-Disordered						poly_jg442.t1	38.936	Non-Disordered														A0A507C7A2	44.9544	Disordered
PBTT_05063	52.0808	Non-Disordered						poly_jg553.t1	38.8451	Non-Disordered														A0A507DBV7	44.9214	Non-Disordered
PBTT_00147	51.7975	Disordered						poly_jg1867.t1	38.4079	Non-Disordered														A0A507D417	44.73	Non-Disordered
PBTT_00761	51.7076	Non-Disordered						poly_jg1309.t1	38.1906	Non-Disordered														A0A507CEM3	44.4517	Non-Disordered
PBTT_02143	51.677	Non-Disordered						poly_jg3662.t1	38.1867	Non-Disordered														A0A507C8G6	44.3959	Non-Disordered
PBTT_00405	51.6191	Disordered						poly_jg7840.t2	38.124	Non-Disordered														A0A507CGD8	44.3788	Disordered
PBTT_03541	51.5742	Disordered						poly_jg753.t1	38.0479	Non-Disordered														A0A507CNY8	44.3487	Non-Disordered
PBTT_10506	51.4738	Non-Disordered						poly_jg3663.t1	37.9088	Non-Disordered														A0A507CM78	44.1136	Non-Disordered
PBTT_02724	51.4139	Non-Disordered						poly_jg9326.t1	37.8696	Non-Disordered														A0A507CZV5	44.0345	Disordered
PBTT_00251	51.3909	Non-Disordered						poly_jg8912.t1	37.8157	Non-Disordered														A0A507DI13	43.5084	Non-Disordered
PBTT_10216	51.3897	Disordered						poly_jg3835.t1	37.7845	Non-Disordered														A0A507D848	43.3341	Non-Disordered
PBTT_06172	51.3554	Disordered						poly_jg371.t1	37.7221	Non-Disordered														A0A507CRG8	43.1896	Non-Disordered
PBTT_00754	51.34	Non-Disordered						poly_jg7059.t1	37.7173	Non-Disordered														A0A507CFR6	42.8812	Non-Disordered
PBTT_05868	51.2685	Disordered						poly_jg3732.t1	37.716	Disordered														A0A507D634	42.8728	Non-Disordered
PBTT_06382	51.0554	Disordered						poly_jg7511.t1	37.7102	Non-Disordered														A0A507D8Y6	42.8069	Non-Disordered
PBTT_05498	51.0117	Non-Disordered						poly_jg9368.t1	37.6735	Non-Disordered														A0A507CV60	42.6644	Non-Disordered
PBTT_05993	50.9573	Disordered						poly_jg423.t1	37.6625	Non-Disordered														A0A507D1I5	42.5449	Disordered
PBTT_07647	50.7821	Non-Disordered						poly_jg9328.t1	37.5205	Non-Disordered														A0A507CPI2	42.5047	Non-Disordered
PBTT_10160	50.6881	Non-Disordered						poly_jg6805.t1	37.5048	Non-Disordered														A0A507CPM8	42.4935	Disordered
PBTT_02394	50.6805	Non-Disordered						poly_jg4670.t1	37.5025	Disordered														A0A507CME3	42.422	Non-Disordered
PBTT_01857	50.5336	Non-Disordered						poly_jg9745.t1	37.5015	Non-Disordered														A0A507C9N5	42.3154	Non-Disordered
PBTT_01859	50.2765	Non-Disordered						poly_jg796.t1	37.4161	Disordered														A0A507CP04	42.2822	Non-Disordered
PBTT_05060	50.1534	Non-Disordered						poly_jg8967.t1	37.3583	Non-Disordered														A0A507DDL7	42.1973	Non-Disordered
PBTT_02202	49.9724	Non-Disordered						poly_jg7051.t1	37.3076	Non-Disordered														A0A507DM74	42.1543	Non-Disordered
PBTT_04374	49.8663	Non-Disordered						poly_jg9762.t1	37.2305	Non-Disordered														A0A507DIP3	41.8977	#N/A
PBTT_03261	49.862	Non-Disordered						poly_jg9970.t1	37.0511	Non-Disordered														A0A507C4S1	41.6798	Disordered
PBTT_07964	49.7883	Non-Disordered						poly_jg8373.t1	37.0444	Non-Disordered														A0A507D6C7	41.5408	Non-Disordered
PBTT_05906	49.6925	Non-Disordered						poly_jg6401.t1	36.961	Disordered														A0A507BH00	41.5262	Non-Disordered
PBTT_04268	49.6507	Non-Disordered						poly_jg8343.t1	36.942	Non-Disordered														A0A507D9C7	41.5072	Non-Disordered
PBTT_07583	49.5831	Disordered						poly_jg7442.t1	36.8558	Non-Disordered														A0A507D5V4	41.3855	Non-Disordered
PBTT_08046	49.537	Non-Disordered						poly_jg8876.t1	36.8467	Disordered														A0A507CH33	41.3809	Non-Disordered
PBTT_10202	49.3706	Disordered						poly_jg3564.t1	36.5699	Non-Disordered														A0A507C7B4	41.1575	Disordered
PBTT_06840	49.3633	Disordered						poly_jg7222.t1	36.5652	Non-Disordered														A0A507CT91	41.0633	Non-Disordered
PBTT_05239	49.3084	Non-Disordered						poly_jg2642.t1	36.3742	Non-Disordered														A0A507D348	40.9218	Non-Disordered
PBTT_08746	49.2577	Disordered						poly_jg5523.t1	36.3183	Disordered														A0A507DNW9	40.7398	Non-Disordered
PBTT_08376	49.1366	Disordered						poly_jg5331.t1	36.2272	Non-Disordered														A0A507CDF9	40.7157	Non-Disordered
PBTT_02346	49.1075	Non-Disordered						poly_jg4653.t1	35.9863	Non-Disordered														A0A507CCY0	40.5515	Non-Disordered
PBTT_04164	49.0869	Disordered						poly_jg9538.t1	35.9705	Non-Disordered														A0A507CW43	40.4389	Non-Disordered
PBTT_04551	48.8976	Non-Disordered						poly_jg10014.t1	35.9437	Non-Disordered														A0A507CI70	40.4036	Non-Disordered
PBTT_03466	48.8418	Disordered						poly_jg7558.t1	35.8027	Disordered														A0A507DD95	40.3929	Non-Disordered
PBTT_04921	48.7817	Non-Disordered						poly_jg1866.t1	35.599	Non-Disordered														A0A507CK60	40.386	Non-Disordered
PBTT_02697	48.6693	Non-Disordered						poly_jg4074.t1	35.2857	Non-Disordered														A0A507CW98	40.1937	Non-Disordered
PBTT_06401	48.6308	Disordered						poly_jg7789.t1	35.1668	Non-Disordered														A0A507C3D3	40.163	Disordered
PBTT_03758	48.6214	Non-Disordered						poly_jg1278.t1	35.1493	Non-Disordered														A0A507D463	40.0591	Non-Disordered
PBTT_07438	48.5657	Non-Disordered						poly_jg2167.t1	35.1387	Non-Disordered														A0A507CYW4	39.9986	Disordered
PBTT_08495	48.4695	Non-Disordered						poly_jg8887.t1	35.0467	Disordered														A0A507CNA1	39.7684	Disordered
PBTT_00926	48.4257	Non-Disordered						poly_jg1049.t1	34.8588	Non-Disordered														A0A507C085	39.6831	Non-Disordered
PBTT_05227	48.3542	Disordered						poly_jg19.t1	34.8188	Non-Disordered														A0A507CX41	39.5448	Non-Disordered
PBTT_01692	48.3293	Non-Disordered						poly_jg7113.t1	34.779	Non-Disordered														A0A507CGC9	39.4817	Non-Disordered
PBTT_08529	48.0153	Non-Disordered						poly_jg8077.t1	34.7252	Disordered														A0A507D1G6	39.2472	Non-Disordered
PBTT_09346	48.0067	Disordered						poly_jg9444.t1	34.4581	Non-Disordered														A0A507DC48	39.1223	Disordered
PBTT_00753	47.9442	Non-Disordered						poly_jg1032.t1	34.3595	Non-Disordered														A0A507CNT0	38.9284	Non-Disordered
PBTT_00374	47.8032	Disordered						poly_jg6556.t1	34.3524	Non-Disordered														A0A507CKF7	38.8645	Non-Disordered
PBTT_06144	47.563	Disordered						poly_jg6028.t1	34.2553	Disordered														A0A507CN72	38.7008	Non-Disordered
PBTT_08631	47.5539	Disordered						poly_jg9653.t2	34.0908	Non-Disordered														A0A507CL96	38.6857	Non-Disordered
PBTT_05027	47.3913	Non-Disordered						poly_jg4544.t1	33.9886	Non-Disordered														A0A507CPA4	38.3924	Disordered
PBTT_03836	47.2924	Disordered						poly_jg4204.t1	33.9056	Non-Disordered														A0A507CKP6	38.3664	Non-Disordered
PBTT_09086	47.2264	Disordered						poly_jg8031.t1	33.5521	Non-Disordered														A0A507DNW4	38.3621	Non-Disordered
PBTT_08044	47.045	Disordered						poly_jg8294.t1	33.2753	Non-Disordered														A0A507BU39	38.225	Non-Disordered
PBTT_10203	46.8382	Disordered						poly_jg6782.t1	33.1344	Disordered														A0A507CFN4	37.9895	Non-Disordered
PBTT_09357	46.759	Non-Disordered						poly_jg1308.t1	33.0512	Non-Disordered														A0A507CIE0	37.9859	Disordered
PBTT_09433	46.7208	Non-Disordered						poly_jg7992.t1	32.911	Non-Disordered														A0A507BU73	37.8386	Non-Disordered
PBTT_03766	46.7113	Non-Disordered						poly_jg854.t1	32.8176	Non-Disordered														A0A507CWY4	37.7199	Non-Disordered
PBTT_09336	46.6135	Disordered						poly_jg2367.t1	32.628	Non-Disordered														A0A507CT39	37.3395	Non-Disordered
PBTT_10446	46.5881	Non-Disordered						poly_jg8866.t1	32.6047	Non-Disordered														A0A507D4F4	37.1761	Non-Disordered
PBTT_10107	46.5141	Non-Disordered						poly_jg2502.t1	32.4298	Disordered														A0A507CFS5	37.1274	Disordered
PBTT_08367	46.5131	Disordered						poly_jg784.t1	32.4291	Non-Disordered														A0A507D1S2	37.0709	Non-Disordered
PBTT_03120	46.4498	Disordered						poly_jg3106.t1	32.3054	Disordered														A0A507DB80	37.0671	Non-Disordered
PBTT_06545	46.3891	Non-Disordered						poly_jg4187.t1	32.2459	Non-Disordered														A0A507CFR4	36.9233	Non-Disordered
PBTT_06436	46.3227	Non-Disordered						poly_jg8913.t1	31.4091	Non-Disordered														A0A507C7N9	36.7235	Non-Disordered
PBTT_04535	46.305	Non-Disordered						poly_jg4161.t1	31.4065	Non-Disordered														A0A507CZF5	36.6568	Non-Disordered
PBTT_09432	46.1541	Non-Disordered						poly_jg2242.t1	31.2098	Non-Disordered														A0A507C831	36.5695	Disordered
PBTT_00750	45.8875	Non-Disordered						poly_jg3645.t1	30.7911	Non-Disordered														A0A507CNV6	36.568	Non-Disordered
PBTT_07582	45.7893	Disordered						poly_jg2250.t1	30.5911	Non-Disordered														A0A507DKZ5	36.5553	Non-Disordered
PBTT_07123	45.6022	Non-Disordered						poly_jg9653.t1	30.3754	Non-Disordered														A0A507CBM8	36.5495	Non-Disordered
PBTT_01205	45.546	Non-Disordered						poly_jg2162.t1	29.7057	Non-Disordered														A0A507CKR2	35.7544	Non-Disordered
PBTT_00611	45.5043	Disordered						poly_jg10116.t1	29.6402	Non-Disordered														A0A507DH72	35.6428	Disordered
PBTT_05056	45.2759	Non-Disordered																						A0A507CG78	35.332	Non-Disordered
PBTT_04313	45.2505	Disordered																						A0A507CNR8	35.3239	Non-Disordered
PBTT_06117	45.1359	Non-Disordered																						A0A507CJZ7	35.2278	Non-Disordered
PBTT_08728	45.0506	Non-Disordered																						A0A507CMQ4	35.1577	Non-Disordered
PBTT_02113	44.8989	Disordered																						A0A507CNS7	34.9943	Non-Disordered
PBTT_00302	44.8349	Non-Disordered																						A0A507D1E4	34.9373	Non-Disordered
PBTT_05194	44.8122	Non-Disordered																						A0A507D8J1	34.9259	Non-Disordered
PBTT_08748	44.6436	Disordered																						A0A507CLE5	34.6352	Non-Disordered
PBTT_03963	44.5719	Non-Disordered																						A0A507CTK5	34.0581	Non-Disordered
PBTT_05125	44.5209	Disordered																						A0A507CEU6	33.8223	Non-Disordered
PBTT_09328	44.3837	Non-Disordered																						A0A507CRD9	33.6767	Non-Disordered
PBTT_03376	44.2281	Non-Disordered																						A0A507CQV8	33.356	Non-Disordered
PBTT_08991	44.0717	Non-Disordered																						A0A507DEX4	33.3456	Non-Disordered
PBTT_01337	44.0347	Non-Disordered																						A0A507BVI9	33.3375	Disordered
PBTT_07413	43.9458	Disordered																						A0A507BYS7	33.2851	Non-Disordered
PBTT_05566	43.9425	Non-Disordered																						A0A507CBK9	33.0469	Non-Disordered
PBTT_02620	43.8032	Non-Disordered																						A0A507CNB9	32.9603	Non-Disordered
PBTT_02512	43.7983	Disordered																						A0A507DF27	32.9447	Non-Disordered
PBTT_05171	43.4812	Non-Disordered																						A0A507BX64	32.7466	Non-Disordered
PBTT_09045	43.4689	Non-Disordered																						A0A507D220	32.6733	Non-Disordered
PBTT_10136	43.4472	Non-Disordered																						A0A507C5G5	32.2568	Disordered
PBTT_07510	43.3963	Non-Disordered																						A0A507D207	32.2485	Non-Disordered
PBTT_06662	43.3869	Non-Disordered																						A0A507CND4	32.2162	Non-Disordered
PBTT_00372	43.2766	Disordered																						A0A507D599	31.9284	Non-Disordered
PBTT_02621	43.1923	Non-Disordered																						A0A507C616	31.665	Non-Disordered
PBTT_03302	43.1659	Disordered																						A0A507CYR0	31.5781	Non-Disordered
PBTT_04131	43.1641	Non-Disordered																						A0A507DIB1	31.0413	Non-Disordered
PBTT_01137	43.1027	Non-Disordered																						A0A507CAP7	30.7574	Disordered
PBTT_01477	43.0474	Disordered																						A0A507DBR0	30.6328	Non-Disordered
PBTT_05123	42.9347	Non-Disordered																						A0A507CCB1	29.747	Non-Disordered
PBTT_08047	42.9128	Non-Disordered																						A0A507CLB9	29.2848	Non-Disordered
PBTT_05627	42.7794	Non-Disordered																						A0A507D006	29.2809	Non-Disordered
PBTT_03308	42.7331	Disordered																						A0A507BSI0	29.2393	Disordered
PBTT_06695	42.5623	Non-Disordered																						A0A507D5N8	28.8518	Non-Disordered
PBTT_04050	42.549	Non-Disordered																						A0A507CL68	28.4865	Non-Disordered
PBTT_09599	42.5006	Non-Disordered																						A0A507C7R5	27.9412	Non-Disordered
PBTT_00969	42.4177	Non-Disordered																						A0A507CEK1	27.8269	Non-Disordered
PBTT_10065	42.1172	Non-Disordered																						A0A507DCK0	24.4756	Non-Disordered
PBTT_00618	41.9752	Non-Disordered
PBTT_05939	41.8682	Disordered
PBTT_04134	41.7462	Non-Disordered
PBTT_09018	41.6507	Non-Disordered
PBTT_03257	41.5872	Non-Disordered
PBTT_05695	41.5232	Non-Disordered
PBTT_07815	41.3465	Disordered
PBTT_04376	41.2793	Non-Disordered
PBTT_05416	40.9856	Non-Disordered
PBTT_06342	40.5464	Disordered
PBTT_06371	40.3159	Non-Disordered
PBTT_05948	40.1274	Disordered
PBTT_09026	40.1209	Non-Disordered
PBTT_07588	40.013	Non-Disordered
PBTT_04092	39.9599	Non-Disordered
PBTT_09023	39.9477	Non-Disordered
PBTT_10432	39.9083	Non-Disordered
PBTT_08160	39.9035	Disordered
PBTT_00759	39.2125	Non-Disordered
PBTT_07662	39.133	Non-Disordered
PBTT_08743	39.1235	Non-Disordered
PBTT_08729	39.1099	Non-Disordered
PBTT_02816	39.0664	Non-Disordered
PBTT_06838	39.0213	Non-Disordered
PBTT_00131	38.8458	Non-Disordered
PBTT_07771	38.7401	Non-Disordered
PBTT_10445	38.5863	Non-Disordered
PBTT_00168	38.3367	Non-Disordered
PBTT_02207	38.2545	Non-Disordered
PBTT_10150	38.1969	Non-Disordered
PBTT_07897	38.1344	Non-Disordered
PBTT_07684	38.1324	Non-Disordered
PBTT_07690	38.0065	Disordered
PBTT_06443	37.9441	Non-Disordered
PBTT_02045	37.9077	Disordered
PBTT_05064	37.7046	Non-Disordered
PBTT_10137	37.6647	Non-Disordered
PBTT_02789	37.6597	Non-Disordered
PBTT_09533	37.6025	Non-Disordered
PBTT_09791	37.5221	Non-Disordered
PBTT_07492	37.4884	Non-Disordered
PBTT_02027	37.3802	Non-Disordered
PBTT_00532	37.3244	Disordered
PBTT_06863	37.2335	Non-Disordered
PBTT_01724	37.0301	Non-Disordered
PBTT_08308	36.7835	Disordered
PBTT_02682	36.7659	Non-Disordered
PBTT_10372	36.6645	Non-Disordered
PBTT_02221	36.6316	Non-Disordered
PBTT_01785	36.5196	Non-Disordered
PBTT_05696	36.4801	Non-Disordered
PBTT_10145	36.2198	Non-Disordered
PBTT_04390	36.0294	Non-Disordered
PBTT_05907	36.017	Non-Disordered
PBTT_05108	36.0136	Non-Disordered
PBTT_05096	36.0114	Non-Disordered
PBTT_00777	35.9593	Disordered
PBTT_09322	35.9386	Non-Disordered
PBTT_07522	35.281	Non-Disordered
PBTT_04375	34.9018	Non-Disordered
PBTT_08034	34.8941	Disordered
PBTT_00249	34.6825	Non-Disordered
PBTT_10135	34.6512	Non-Disordered
PBTT_09688	34.6443	Non-Disordered
PBTT_07717	34.6417	Non-Disordered
PBTT_00167	34.4679	Non-Disordered
PBTT_08577	34.4086	Non-Disordered
PBTT_09953	34.1563	Non-Disordered
PBTT_02602	34.1014	Non-Disordered
PBTT_10124	33.6659	Non-Disordered
PBTT_07687	32.4332	Non-Disordered
PBTT_07428	31.9039	Non-Disordered
PBTT_09493	31.3301	Non-Disordered
PBTT_00472	31.2402	Disordered
PBTT_07040	27.8806	Non-Disordered

## Sheet: InterproScan
InterproScan analysis of the proteins investigated in this study.
A0A024GLU4	526	Pfam	PF00082	Subtilase family	168	456	1.7e-40	IPR000209	Peptidase S8/S53 domain
A0A024GLU4	526	Gene3D	G3DSA:3.40.50.200	Peptidase S8/S53 domain	142	467	6.3e-74	IPR036852	Peptidase S8/S53 domain superfamily
A0A024GLU4	526	SUPERFAMILY	SSF52743	Subtilisin-like	140	468	3.53e-68	IPR036852	Peptidase S8/S53 domain superfamily
A0A024FZX0	336	Gene3D	G3DSA:3.40.390.10	Collagenase (Catalytic Domain)	81	324	9.5e-31	IPR024079	Metallopeptidase, catalytic domain superfamily
A0A024FZX0	336	SUPERFAMILY	SSF55486	Metalloproteases ("zincins"), catalytic domain	86	322	1.36e-18	-	-
A0A024FZX0	336	Pfam	PF01400	Astacin (Peptidase family M12A)	88	251	2.2e-09	IPR001506	Peptidase M12A
A0A024GMD2	354	Gene3D	G3DSA:3.20.20.190	Phosphatidylinositol (PI) phosphodiesterase	51	316	3.3e-15	IPR017946	PLC-like phosphodiesterase, TIM beta/alpha-barrel domain superfamily
A0A024GMD2	354	SUPERFAMILY	SSF51695	PLC-like phosphodiesterases	83	343	4.97e-18	IPR017946	PLC-like phosphodiesterase, TIM beta/alpha-barrel domain superfamily
A0A024FSY0	294	SUPERFAMILY	SSF49590	PHL pollen allergen	112	191	1.44e-07	IPR036749	Expansin, cellulose-binding-like domain superfamily
A0A024FSY0	294	Gene3D	G3DSA:2.60.40.760	-	111	202	8.5e-17	IPR036749	Expansin, cellulose-binding-like domain superfamily
A0A024FSY0	294	SUPERFAMILY	SSF50685	Barwin-like endoglucanases	3	132	4.53e-19	IPR036908	RlpA-like domain superfamily
A0A024FSY0	294	Gene3D	G3DSA:2.40.40.10	-	1	106	1.5e-21	IPR036908	RlpA-like domain superfamily
A0A024GE61	309	Gene3D	G3DSA:3.40.33.10	CAP	10	157	5.9e-32	IPR035940	CAP superfamily
A0A024GE61	309	SUPERFAMILY	SSF55797	PR-1-like	33	158	1.83e-16	IPR035940	CAP superfamily
A0A024GE61	309	Pfam	PF00188	Cysteine-rich secretory protein family	41	157	2.9e-09	IPR014044	CAP domain
A0A024GKK9	181	SUPERFAMILY	SSF48647	Fungal elicitin	3	88	1.96e-07	IPR036470	Elicitin superfamily
A0A024GKK9	181	Pfam	PF00964	Elicitin	3	87	5.2e-09	IPR002200	Elicitin
A0A024GKK9	181	Gene3D	G3DSA:1.10.239.10	Elicitin domain	1	89	8.8e-09	IPR036470	Elicitin superfamily
A0A024GPZ9	426	Pfam	PF00085	Thioredoxin	150	252	6.5e-28	IPR013766	Thioredoxin domain
A0A024GPZ9	426	Pfam	PF00085	Thioredoxin	9	106	5.3e-30	IPR013766	Thioredoxin domain
A0A024GPZ9	426	SUPERFAMILY	SSF52833	Thioredoxin-like	301	379	1.53e-07	IPR036249	Thioredoxin-like superfamily
A0A024GPZ9	426	SUPERFAMILY	SSF52833	Thioredoxin-like	4	109	2.5e-33	IPR036249	Thioredoxin-like superfamily
A0A024GPZ9	426	Gene3D	G3DSA:3.40.30.10	Glutaredoxin	1	146	8.5e-42	-	-
A0A024GPZ9	426	SUPERFAMILY	SSF52833	Thioredoxin-like	145	255	5.97e-34	IPR036249	Thioredoxin-like superfamily
A0A024GPZ9	426	Gene3D	G3DSA:3.40.30.10	Glutaredoxin	147	262	1.3e-35	-	-
A0A024GNP3	385	SUPERFAMILY	SSF56300	Metallo-dependent phosphatases	8	345	7.38e-17	IPR029052	Metallo-dependent phosphatase-like
A0A024GNP3	385	Gene3D	G3DSA:3.60.21.10	-	8	373	7e-29	IPR029052	Metallo-dependent phosphatase-like
A0A024GNJ1	166	SUPERFAMILY	SSF53474	alpha/beta-Hydrolases	1	157	3.68e-32	IPR029058	Alpha/Beta hydrolase fold
A0A024GNJ1	166	Gene3D	G3DSA:3.40.50.1820	alpha/beta hydrolase	1	163	1.7e-43	IPR029058	Alpha/Beta hydrolase fold
A0A024GNJ1	166	Pfam	PF01083	Cutinase	1	158	7.2e-32	IPR000675	Cutinase/acetylxylan esterase
A0A024GMJ0	166	SUPERFAMILY	SSF53474	alpha/beta-Hydrolases	1	157	3.68e-32	IPR029058	Alpha/Beta hydrolase fold
A0A024GMJ0	166	Gene3D	G3DSA:3.40.50.1820	alpha/beta hydrolase	1	163	1.7e-43	IPR029058	Alpha/Beta hydrolase fold
A0A024GMJ0	166	Pfam	PF01083	Cutinase	1	158	7.2e-32	IPR000675	Cutinase/acetylxylan esterase
A0A024FXJ4	414	Pfam	PF00840	Glycosyl hydrolase family 7	8	410	4.4e-136	IPR001722	Glycoside hydrolase, family 7
A0A024FXJ4	414	SUPERFAMILY	SSF49899	Concanavalin A-like lectins/glucanases	8	411	7.39e-124	IPR013320	Concanavalin A-like lectin/glucanase domain superfamily
A0A024FXJ4	414	Gene3D	G3DSA:2.70.100.10	Glycoside hydrolase, family 7, domain	5	413	1.1e-145	IPR037019	Glycoside hydrolase family 7, catalytic domain superfamily
A0A024FUP1	258	Gene3D	G3DSA:3.40.33.10	CAP	72	253	4e-28	IPR035940	CAP superfamily
A0A024FUP1	258	SUPERFAMILY	SSF55797	PR-1-like	129	252	4.19e-12	IPR035940	CAP superfamily
A0A024FUP1	258	Pfam	PF00188	Cysteine-rich secretory protein family	135	250	2e-07	IPR014044	CAP domain
A0A024GE50	367	Gene3D	G3DSA:3.90.245.10	-	2	315	3.5e-07	IPR036452	Ribonucleoside hydrolase-like
A0A024GE50	367	SUPERFAMILY	SSF53590	Nucleoside hydrolase	5	289	3.92e-09	IPR036452	Ribonucleoside hydrolase-like
A0A024GDA0	222	Gene3D	G3DSA:2.60.40.10	Immunoglobulins	13	107	1.5e-05	IPR013783	Immunoglobulin-like fold
A0A024G7F4	455	Pfam	PF01650	Peptidase C13 family	2	274	6.5e-97	IPR001096	Peptidase C13, legumain
A0A024G7F4	455	Gene3D	G3DSA:3.40.50.1460	-	1	295	4.8e-106	-	-
A0A024G7F4	455	Gene3D	G3DSA:1.10.132.130	-	309	434	1.3e-09	IPR046427	Legumain prodomain superfamily
A0A024GL07	496	Pfam	PF03372	Endonuclease/Exonuclease/phosphatase family	209	488	1.2e-14	IPR005135	Endonuclease/exonuclease/phosphatase
A0A024GL07	496	Gene3D	G3DSA:3.60.10.10	Endonuclease/exonuclease/phosphatase	204	496	8.2e-52	IPR036691	Endonuclease/exonuclease/phosphatase superfamily
A0A024GL07	496	SUPERFAMILY	SSF56219	DNase I-like	203	495	2.36e-37	IPR036691	Endonuclease/exonuclease/phosphatase superfamily
A0A024FUF8	269	Gene3D	G3DSA:2.40.70.10	Acid Proteases	113	249	2.5e-09	IPR021109	Aspartic peptidase domain superfamily
A0A024FUF8	269	SUPERFAMILY	SSF50630	Acid proteases	141	240	1.89e-07	IPR021109	Aspartic peptidase domain superfamily
A0A024GNL0	480	Gene3D	G3DSA:3.20.20.190	Phosphatidylinositol (PI) phosphodiesterase	43	313	2.4e-19	IPR017946	PLC-like phosphodiesterase, TIM beta/alpha-barrel domain superfamily
A0A024GNL0	480	SUPERFAMILY	SSF51695	PLC-like phosphodiesterases	60	292	7.12e-24	IPR017946	PLC-like phosphodiesterase, TIM beta/alpha-barrel domain superfamily
A0A024FWB9	409	SUPERFAMILY	SSF56784	HAD-like	139	348	6.68e-05	IPR036412	HAD-like superfamily
A0A024FWB9	409	Gene3D	G3DSA:1.20.1440.320	-	51	211	7.9e-20	-	-
A0A024FWB9	409	Gene3D	G3DSA:3.40.50.1000	-	9	361	7.9e-20	IPR023214	HAD superfamily
A0A024G6S6	372	Gene3D	G3DSA:3.40.50.1000	-	171	366	3.2e-21	IPR023214	HAD superfamily
A0A024G6S6	372	SUPERFAMILY	SSF56784	HAD-like	199	311	4.67e-08	IPR036412	HAD-like superfamily
A0A024FZN7	913	SUPERFAMILY	SSF47862	Saposin	245	356	2.24e-06	IPR011001	Saposin-like
A0A024FZN7	913	SUPERFAMILY	SSF47862	Saposin	795	866	6.93e-05	IPR011001	Saposin-like
A0A024FZN7	913	Gene3D	G3DSA:1.10.225.10	-	197	278	7.8e-10	-	-
A0A024FZN7	913	SUPERFAMILY	SSF47862	Saposin	426	498	5.49e-07	IPR011001	Saposin-like
A0A024FZN7	913	Gene3D	G3DSA:1.10.225.10	-	315	394	5.7e-07	-	-
A0A024FZN7	913	Gene3D	G3DSA:1.10.225.10	-	421	504	2.2e-08	-	-
A0A024FZN7	913	Gene3D	G3DSA:1.10.225.10	-	791	870	7.5e-06	-	-
A0A024FZN7	913	SUPERFAMILY	SSF47862	Saposin	205	279	7.85e-08	IPR011001	Saposin-like
A0A024G4F7	562	Pfam	PF03577	Peptidase family C69	1	470	2.7e-49	IPR005322	Peptidase C69, dipeptidase A
A0A024GM25	738	Gene3D	G3DSA:1.10.287.110	DnaJ domain	652	714	2.9e-09	IPR036869	Chaperone J-domain superfamily
A0A024GM25	738	Pfam	PF00226	DnaJ domain	657	713	8e-08	IPR001623	DnaJ domain
A0A024GM25	738	SUPERFAMILY	SSF46565	Chaperone J-domain	652	714	4.19e-11	IPR036869	Chaperone J-domain superfamily
A0A024GU63	635	SUPERFAMILY	SSF52833	Thioredoxin-like	3	160	1.91e-46	IPR036249	Thioredoxin-like superfamily
A0A024GU63	635	Gene3D	G3DSA:3.40.30.10	Glutaredoxin	1	162	5.9e-62	-	-
A0A024GU63	635	SUPERFAMILY	SSF54001	Cysteine proteinases	247	627	3.53e-86	IPR038765	Papain-like cysteine peptidase superfamily
A0A024GU63	635	Pfam	PF00255	Glutathione peroxidase	6	113	7.3e-35	IPR000889	Glutathione peroxidase
A0A024GU63	635	Gene3D	G3DSA:3.90.70.10	Cysteine proteinases	242	634	1.3e-94	-	-
A0A024GU63	635	Pfam	PF00443	Ubiquitin carboxyl-terminal hydrolase	249	625	6.2e-60	IPR001394	Peptidase C19, ubiquitin carboxyl-terminal hydrolase
A0A024G183	798	Gene3D	G3DSA:2.40.10.10	-	303	380	5.3e-09	IPR043504	Peptidase S1, PA clan, chymotrypsin-like fold
A0A024G183	798	Pfam	PF13365	Trypsin-like peptidase domain	193	353	4.5e-15	-	-
A0A024G183	798	Gene3D	G3DSA:2.40.10.10	-	184	282	5.3e-10	IPR043504	Peptidase S1, PA clan, chymotrypsin-like fold
A0A024G183	798	SUPERFAMILY	SSF50494	Trypsin-like serine proteases	174	369	2.32e-23	IPR009003	Peptidase S1, PA clan
A0A024GAD9	350	Gene3D	G3DSA:3.90.70.10	Cysteine proteinases	8	333	1.1e-92	-	-
A0A024GAD9	350	Pfam	PF00112	Papain family cysteine protease	112	331	8.8e-68	IPR000668	Peptidase C1A, papain C-terminal
A0A024GAD9	350	SUPERFAMILY	SSF54001	Cysteine proteinases	12	332	5.61e-93	IPR038765	Papain-like cysteine peptidase superfamily
A0A024GAD9	350	Pfam	PF08246	Cathepsin propeptide inhibitor domain (I29)	18	82	8.1e-10	IPR013201	Cathepsin propeptide inhibitor domain (I29)
A0A024GA39	157	Pfam	PF00964	Elicitin	17	107	2e-07	IPR002200	Elicitin
A0A024GA39	157	SUPERFAMILY	SSF48647	Fungal elicitin	23	108	6.54e-05	IPR036470	Elicitin superfamily
A0A024GRJ2	361	Gene3D	G3DSA:3.90.245.10	-	1	318	4.6e-08	IPR036452	Ribonucleoside hydrolase-like
A0A024GRJ2	361	SUPERFAMILY	SSF53590	Nucleoside hydrolase	4	275	8.24e-08	IPR036452	Ribonucleoside hydrolase-like
A0A024GKM7	214	SUPERFAMILY	SSF48647	Fungal elicitin	88	158	1.83e-05	IPR036470	Elicitin superfamily
A0A024GKM7	214	Pfam	PF00964	Elicitin	67	157	4.7e-08	IPR002200	Elicitin
A0A024GFQ1	355	Gene3D	G3DSA:3.40.33.10	CAP	4	153	1.7e-28	IPR035940	CAP superfamily
A0A024GFQ1	355	SUPERFAMILY	SSF55797	PR-1-like	13	153	4.19e-14	IPR035940	CAP superfamily
A0A024GFQ1	355	Pfam	PF00188	Cysteine-rich secretory protein family	57	152	3.2e-10	IPR014044	CAP domain
A0A024FX41	321	Gene3D	G3DSA:2.40.70.10	Acid Proteases	195	302	1.5e-06	IPR021109	Aspartic peptidase domain superfamily
A0A024FX41	321	SUPERFAMILY	SSF50630	Acid proteases	202	298	6.61e-05	IPR021109	Aspartic peptidase domain superfamily
A0A024FVP0	543	Gene3D	G3DSA:1.10.510.10	Transferase(Phosphotransferase) domain 1	356	525	1.3e-26	-	-
A0A024FVP0	543	Pfam	PF00069	Protein kinase domain	358	500	1.3e-22	IPR000719	Protein kinase domain
A0A024FVP0	543	SUPERFAMILY	SSF56112	Protein kinase-like (PK-like)	207	500	3.85e-35	IPR011009	Protein kinase-like domain superfamily
A0A024GQX3	711	Gene3D	G3DSA:3.60.20.30	(Glycosyl)asparaginase	191	322	2.5e-36	-	-
A0A024GQX3	711	SUPERFAMILY	SSF57903	FYVE/PHD zinc finger	320	356	4.65e-05	IPR011011	Zinc finger, FYVE/PHD-type
A0A024GQX3	711	Pfam	PF01590	GAF domain	448	569	3.6e-08	IPR003018	GAF domain
A0A024GQX3	711	Gene3D	G3DSA:3.30.450.40	-	434	585	1.3e-15	IPR029016	GAF-like domain superfamily
A0A024GQX3	711	SUPERFAMILY	SSF56235	N-terminal nucleophile aminohydrolases (Ntn hydrolases)	3	317	2.37e-78	IPR029055	Nucleophile aminohydrolases, N-terminal
A0A024GQX3	711	Pfam	PF01112	Asparaginase	11	299	6.1e-71	IPR000246	Peptidase T2, asparaginase 2
A0A024GQX3	711	SUPERFAMILY	SSF55781	GAF domain-like	448	576	1.88e-21	-	-
A0A024GRE2	711	Gene3D	G3DSA:3.60.20.30	(Glycosyl)asparaginase	191	322	2.5e-36	-	-
A0A024GRE2	711	SUPERFAMILY	SSF57903	FYVE/PHD zinc finger	320	356	4.65e-05	IPR011011	Zinc finger, FYVE/PHD-type
A0A024GRE2	711	Pfam	PF01590	GAF domain	448	569	3.6e-08	IPR003018	GAF domain
A0A024GRE2	711	Gene3D	G3DSA:3.30.450.40	-	434	585	1.3e-15	IPR029016	GAF-like domain superfamily
A0A024GRE2	711	SUPERFAMILY	SSF56235	N-terminal nucleophile aminohydrolases (Ntn hydrolases)	3	317	2.37e-78	IPR029055	Nucleophile aminohydrolases, N-terminal
A0A024GRE2	711	Pfam	PF01112	Asparaginase	11	299	6.1e-71	IPR000246	Peptidase T2, asparaginase 2
A0A024GRE2	711	SUPERFAMILY	SSF55781	GAF domain-like	448	576	1.88e-21	-	-
A0A024GHX2	239	Gene3D	G3DSA:2.40.70.10	Acid Proteases	72	228	1.3e-06	IPR021109	Aspartic peptidase domain superfamily
A0A024GHX2	239	SUPERFAMILY	SSF50630	Acid proteases	83	218	1.22e-05	IPR021109	Aspartic peptidase domain superfamily
A0A024G6Q7	440	Gene3D	G3DSA:3.30.40.240	Transglutaminase elicitor, body domain	114	200	1.5e-18	-	-
A0A024G6Q7	440	Pfam	PF16683	Transglutaminase elicitor	76	436	1.5e-86	IPR032048	Transglutaminase elicitor
A0A024G0T1	728	Gene3D	G3DSA:2.70.98.30	-	33	268	6.3e-40	-	-
A0A024G0T1	728	Pfam	PF17652	Glycosyl hydrolase family 81 C-terminal domain	372	719	3.9e-114	IPR040720	Glycosyl hydrolase family 81, C-terminal domain
A0A024G0T1	728	Pfam	PF03639	Glycosyl hydrolase family 81 N-terminal domain	36	342	2.2e-45	IPR040451	Glycosyl hydrolase family 81, N-terminal
A0A024G0T1	728	Gene3D	G3DSA:1.20.5.420	Immunoglobulin FC, subunit C	682	728	5.6e-19	-	-
A0A024FZT4	407	Pfam	PF02800	Glyceraldehyde 3-phosphate dehydrogenase, C-terminal domain	226	385	8e-68	IPR020829	Glyceraldehyde 3-phosphate dehydrogenase, catalytic domain
A0A024FZT4	407	Gene3D	G3DSA:3.40.50.720	-	74	399	4e-162	-	-
A0A024FZT4	407	Pfam	PF00044	Glyceraldehyde 3-phosphate dehydrogenase, NAD binding domain	73	172	1.6e-38	IPR020828	Glyceraldehyde 3-phosphate dehydrogenase, NAD(P) binding domain
A0A024FZT4	407	SUPERFAMILY	SSF51735	NAD(P)-binding Rossmann-fold domains	73	237	1.75e-71	IPR036291	NAD(P)-binding domain superfamily
A0A024FZT4	407	SUPERFAMILY	SSF55347	Glyceraldehyde-3-phosphate dehydrogenase-like, C-terminal domain	220	385	2.28e-77	-	-
A0A024FZT4	407	Gene3D	G3DSA:3.30.360.10	Dihydrodipicolinate Reductase; domain 2	219	389	4e-162	-	-
A0A024GR98	210	Pfam	PF00964	Elicitin	63	153	1.2e-06	IPR002200	Elicitin
A0A024GTA6	522	SUPERFAMILY	SSF51695	PLC-like phosphodiesterases	89	190	7.85e-13	IPR017946	PLC-like phosphodiesterase, TIM beta/alpha-barrel domain superfamily
A0A024GTA6	522	SUPERFAMILY	SSF51695	PLC-like phosphodiesterases	218	360	1.88e-07	IPR017946	PLC-like phosphodiesterase, TIM beta/alpha-barrel domain superfamily
A0A024GTA6	522	Gene3D	G3DSA:3.20.20.190	Phosphatidylinositol (PI) phosphodiesterase	81	328	2.5e-16	IPR017946	PLC-like phosphodiesterase, TIM beta/alpha-barrel domain superfamily
A0A024GCW0	359	Pfam	PF00085	Thioredoxin	3	105	1.1e-28	IPR013766	Thioredoxin domain
A0A024GCW0	359	Pfam	PF00085	Thioredoxin	121	226	3.3e-24	IPR013766	Thioredoxin domain
A0A024GCW0	359	Pfam	PF07749	Endoplasmic reticulum protein ERp29, C-terminal domain	244	333	4.4e-16	IPR011679	Endoplasmic reticulum resident protein 29, C-terminal
A0A024GCW0	359	Gene3D	G3DSA:3.40.30.10	Glutaredoxin	112	246	6.1e-37	-	-
A0A024GCW0	359	Gene3D	G3DSA:3.40.30.10	Glutaredoxin	1	111	2.6e-40	-	-
A0A024GCW0	359	SUPERFAMILY	SSF47933	ERP29 C domain-like	243	340	4.58e-16	IPR036356	Endoplasmic reticulum resident protein 29, C-terminal domain superfamily
A0A024GCW0	359	Gene3D	G3DSA:1.20.1150.12	-	247	344	6.8e-17	IPR036356	Endoplasmic reticulum resident protein 29, C-terminal domain superfamily
A0A024GCW0	359	SUPERFAMILY	SSF52833	Thioredoxin-like	1	109	1.18e-34	IPR036249	Thioredoxin-like superfamily
A0A024GCW0	359	SUPERFAMILY	SSF52833	Thioredoxin-like	120	232	3.86e-33	IPR036249	Thioredoxin-like superfamily
A0A024GKG1	369	Gene3D	G3DSA:3.90.245.10	-	1	306	4.2e-11	IPR036452	Ribonucleoside hydrolase-like
A0A024GKG1	369	SUPERFAMILY	SSF53590	Nucleoside hydrolase	5	271	3.14e-11	IPR036452	Ribonucleoside hydrolase-like
A0A024G674	367	Gene3D	G3DSA:3.60.21.10	-	68	360	7.7e-35	IPR029052	Metallo-dependent phosphatase-like
A0A024G674	367	SUPERFAMILY	SSF56300	Metallo-dependent phosphatases	70	347	5.38e-31	IPR029052	Metallo-dependent phosphatase-like
A0A024G674	367	Pfam	PF00149	Calcineurin-like phosphoesterase	71	283	1.8e-14	IPR004843	Calcineurin-like phosphoesterase domain, ApaH type
A0A024GTT4	444	SUPERFAMILY	SSF49899	Concanavalin A-like lectins/glucanases	1	441	2.01e-168	IPR013320	Concanavalin A-like lectin/glucanase domain superfamily
A0A024GTT4	444	Gene3D	G3DSA:2.70.100.10	Glycoside hydrolase, family 7, domain	1	442	1.6e-195	IPR037019	Glycoside hydrolase family 7, catalytic domain superfamily
A0A024GTT4	444	Pfam	PF00840	Glycosyl hydrolase family 7	3	439	7.7e-187	IPR001722	Glycoside hydrolase, family 7
A0A024GIZ8	293	SUPERFAMILY	SSF53474	alpha/beta-Hydrolases	34	288	7.02e-51	IPR029058	Alpha/Beta hydrolase fold
A0A024GIZ8	293	Gene3D	G3DSA:3.40.50.1820	alpha/beta hydrolase	28	292	1.1e-66	IPR029058	Alpha/Beta hydrolase fold
A0A024GIZ8	293	Pfam	PF01764	Lipase (class 3)	99	233	2.1e-36	IPR002921	Fungal lipase-like domain
A0A024GM31	503	SUPERFAMILY	SSF51695	PLC-like phosphodiesterases	61	321	3.56e-16	IPR017946	PLC-like phosphodiesterase, TIM beta/alpha-barrel domain superfamily
A0A024GM31	503	Gene3D	G3DSA:3.20.20.190	Phosphatidylinositol (PI) phosphodiesterase	53	362	2.7e-15	IPR017946	PLC-like phosphodiesterase, TIM beta/alpha-barrel domain superfamily
A0A024FX29	267	SUPERFAMILY	SSF50630	Acid proteases	134	247	3.1e-07	IPR021109	Aspartic peptidase domain superfamily
A0A024FX29	267	Gene3D	G3DSA:2.40.70.10	Acid Proteases	109	254	2.7e-07	IPR021109	Aspartic peptidase domain superfamily
A0A024GA40	362	Pfam	PF06058	Dcp1-like decapping family	37	156	4.8e-35	IPR010334	mRNA-decapping enzyme subunit 1
A0A024GA40	362	Gene3D	G3DSA:6.10.140.2030	-	319	362	1.6e-06	-	-
A0A024GA40	362	Gene3D	G3DSA:2.30.29.30	-	24	161	3.7e-38	IPR011993	PH-like domain superfamily
A0A024GA40	362	SUPERFAMILY	SSF50729	PH domain-like	38	162	6.15e-33	-	-
A0A024GC47	426	Gene3D	G3DSA:1.10.287.410	-	193	262	2.8e-150	-	-
A0A024GC47	426	Gene3D	G3DSA:3.40.50.1820	alpha/beta hydrolase	24	421	2.8e-150	IPR029058	Alpha/Beta hydrolase fold
A0A024GC47	426	SUPERFAMILY	SSF53474	alpha/beta-Hydrolases	22	424	7.34e-129	IPR029058	Alpha/Beta hydrolase fold
A0A024GC47	426	Pfam	PF00450	Serine carboxypeptidase	23	422	4e-127	IPR001563	Peptidase S10, serine carboxypeptidase
A0A024G0X1	773	SUPERFAMILY	SSF50978	WD40 repeat-like	638	771	1.43e-15	IPR036322	WD40-repeat-containing domain superfamily
A0A024G0X1	773	SUPERFAMILY	SSF48371	ARM repeat	183	448	3.99e-14	IPR016024	Armadillo-type fold
A0A024G0X1	773	Pfam	PF12265	Histone-binding protein RBBP4 or subunit C of CAF1 complex	539	608	5e-29	IPR022052	Histone-binding protein RBBP4, N-terminal
A0A024G0X1	773	Gene3D	G3DSA:1.25.10.10	-	192	497	1.2e-28	IPR011989	Armadillo-like helical
A0A024G0X1	773	Gene3D	G3DSA:2.130.10.10	-	524	773	6.6e-77	IPR015943	WD40/YVTN repeat-like-containing domain superfamily
A0A024FZY8	666	Pfam	PF10290	Cell wall protein YJL171C/Tos1, N-terminal	362	423	1.2e-15	IPR018807	Cell wall protein YJL171C/Tos1, N-terminal
A0A024FZY8	666	Pfam	PF10287	Cell wall protein YJL171C/Tos1, C-terminal	429	630	1.3e-56	IPR018805	Cell wall protein YJL171C/Tos1, C-terminal
A0A024FZY8	666	Gene3D	G3DSA:2.60.120.200	-	447	653	1.1e-05	-	-
A0A024G1H1	468	Pfam	PF00782	Dual specificity phosphatase, catalytic domain	78	210	3.4e-25	IPR000340	Dual specificity phosphatase, catalytic domain
A0A024G1H1	468	Gene3D	G3DSA:3.90.190.10	Protein tyrosine phosphatase superfamily	51	219	5.7e-38	IPR029021	Protein-tyrosine phosphatase-like
A0A024G1H1	468	SUPERFAMILY	SSF55753	Actin depolymerizing proteins	391	466	4.67e-07	-	-
A0A024G1H1	468	SUPERFAMILY	SSF52799	(Phosphotyrosine protein) phosphatases II	70	216	7.78e-28	IPR029021	Protein-tyrosine phosphatase-like
A0A024FUD4	910	Gene3D	G3DSA:3.90.1580.10	-	537	791	1.5e-30	IPR042095	Sulfatase-modifying factor enzyme superfamily
A0A024FUD4	910	Pfam	PF03781	Sulfatase-modifying factor enzyme 1	554	784	6e-20	IPR005532	Sulfatase-modifying factor enzyme
A0A024FUD4	910	SUPERFAMILY	SSF56436	C-type lectin-like	557	786	1.6e-28	IPR016187	C-type lectin fold
A0A024G5G8	390	Gene3D	G3DSA:3.40.50.1000	-	167	384	7.4e-20	IPR023214	HAD superfamily
A0A024G5G8	390	SUPERFAMILY	SSF56784	HAD-like	196	345	4.5e-07	IPR036412	HAD-like superfamily
A0A024GNX2	203	Gene3D	G3DSA:3.40.33.10	CAP	1	141	1.3e-08	IPR035940	CAP superfamily
A0A024GNX2	203	SUPERFAMILY	SSF55797	PR-1-like	3	136	5.36e-06	IPR035940	CAP superfamily
A0A024GHT0	340	Gene3D	G3DSA:1.10.240.10	-	200	310	1.6e-126	-	-
A0A024GHT0	340	Pfam	PF00579	tRNA synthetases class I (W and Y)	8	292	2.4e-70	IPR002305	Aminoacyl-tRNA synthetase, class Ic
A0A024GHT0	340	Gene3D	G3DSA:3.40.50.620	HUPs	10	339	1.6e-126	IPR014729	Rossmann-like alpha/beta/alpha sandwich fold
A0A024GHT0	340	SUPERFAMILY	SSF52374	Nucleotidylyl transferase	9	339	1.03e-84	-	-
A0A024G7C8	353	Gene3D	G3DSA:2.40.70.10	Acid Proteases	161	317	2.7e-07	IPR021109	Aspartic peptidase domain superfamily
A0A024G7C8	353	SUPERFAMILY	SSF50630	Acid proteases	195	313	6.44e-05	IPR021109	Aspartic peptidase domain superfamily
A0A024G6F5	650	SUPERFAMILY	SSF55486	Metalloproteases ("zincins"), catalytic domain	68	578	7.32e-87	-	-
A0A024G6F5	650	Gene3D	G3DSA:2.10.55.10	Leishmanolysin domain 3	401	463	1.8e-12	-	-
A0A024G6F5	650	Pfam	PF01457	Leishmanolysin	161	248	1.4e-16	IPR001577	Peptidase M8, leishmanolysin
A0A024G6F5	650	Pfam	PF01457	Leishmanolysin	294	575	8.9e-48	IPR001577	Peptidase M8, leishmanolysin
A0A024G6F5	650	Gene3D	G3DSA:3.10.170.20	-	56	237	4.9e-32	-	-
A0A024G6F5	650	Gene3D	G3DSA:2.10.25.10	Laminin	577	609	2.1e-05	-	-
A0A024G6F5	650	Gene3D	G3DSA:3.90.132.10	Leishmanolysin , domain 2	286	398	1.2e-37	-	-
A0A024GC42	579	Gene3D	G3DSA:2.115.10.20	Glycosyl hydrolase domain; family 43	2	394	1e-94	IPR023296	Glycosyl hydrolase, five-bladed beta-propellor domain superfamily
A0A024GC42	579	SUPERFAMILY	SSF49899	Concanavalin A-like lectins/glucanases	387	565	7.91e-19	IPR013320	Concanavalin A-like lectin/glucanase domain superfamily
A0A024GC42	579	Pfam	PF08244	Glycosyl hydrolases family 32 C terminal	390	565	1.7e-25	IPR013189	Glycosyl hydrolase family 32, C-terminal
A0A024GC42	579	SUPERFAMILY	SSF75005	Arabinanase/levansucrase/invertase	11	342	4.71e-59	IPR023296	Glycosyl hydrolase, five-bladed beta-propellor domain superfamily
A0A024GC42	579	Pfam	PF00251	Glycosyl hydrolases family 32 N-terminal domain	17	343	9.4e-48	IPR013148	Glycosyl hydrolase family 32, N-terminal
A0A024GC42	579	Gene3D	G3DSA:2.60.120.560	-	412	576	3e-36	-	-
A0A024GAB1	284	Gene3D	G3DSA:1.10.239.10	Elicitin domain	4	85	2.8e-08	IPR036470	Elicitin superfamily
A0A024GAP6	141	Gene3D	G3DSA:1.10.239.10	Elicitin domain	4	101	4.5e-06	IPR036470	Elicitin superfamily
A0A024GAP6	141	SUPERFAMILY	SSF48647	Fungal elicitin	23	102	3.27e-06	IPR036470	Elicitin superfamily
A0A024GAP6	141	Pfam	PF00964	Elicitin	11	100	3.2e-08	IPR002200	Elicitin
A0A024GRE7	330	Gene3D	G3DSA:3.60.20.30	(Glycosyl)asparaginase	191	326	4.4e-37	-	-
A0A024GRE7	330	SUPERFAMILY	SSF56235	N-terminal nucleophile aminohydrolases (Ntn hydrolases)	3	320	9.07e-80	IPR029055	Nucleophile aminohydrolases, N-terminal
A0A024GRE7	330	Pfam	PF01112	Asparaginase	10	299	6.6e-72	IPR000246	Peptidase T2, asparaginase 2
A0A024GRW4	330	Gene3D	G3DSA:3.60.20.30	(Glycosyl)asparaginase	191	326	4.4e-37	-	-
A0A024GRW4	330	SUPERFAMILY	SSF56235	N-terminal nucleophile aminohydrolases (Ntn hydrolases)	3	320	9.07e-80	IPR029055	Nucleophile aminohydrolases, N-terminal
A0A024GRW4	330	Pfam	PF01112	Asparaginase	10	299	6.6e-72	IPR000246	Peptidase T2, asparaginase 2
A0A024GVE2	369	Pfam	PF12710	haloacid dehalogenase-like hydrolase	198	306	6.5e-09	-	-
A0A024GVE2	369	SUPERFAMILY	SSF56784	HAD-like	40	306	2.66e-14	IPR036412	HAD-like superfamily
A0A024GVE2	369	Gene3D	G3DSA:3.40.50.1000	-	4	319	9.9e-13	IPR023214	HAD superfamily
A0A024GFG7	277	Pfam	PF13540	Regulator of chromosome condensation (RCC1) repeat	91	112	1.5e-06	-	-
A0A024GFG7	277	SUPERFAMILY	SSF50985	RCC1/BLIP-II	34	270	2.62e-35	IPR009091	Regulator of chromosome condensation 1/beta-lactamase-inhibitor protein II
A0A024GFG7	277	Gene3D	G3DSA:2.130.10.30	-	85	276	1e-39	IPR009091	Regulator of chromosome condensation 1/beta-lactamase-inhibitor protein II
A0A024GFG7	277	Gene3D	G3DSA:2.130.10.30	-	10	84	2e-14	IPR009091	Regulator of chromosome condensation 1/beta-lactamase-inhibitor protein II
A0A024GRR6	378	Pfam	PF01156	Inosine-uridine preferring nucleoside hydrolase	8	278	1.5e-13	IPR001910	Inosine/uridine-preferring nucleoside hydrolase domain
A0A024GRR6	378	Gene3D	G3DSA:3.90.245.10	-	5	337	8.4e-18	IPR036452	Ribonucleoside hydrolase-like
A0A024GRR6	378	SUPERFAMILY	SSF53590	Nucleoside hydrolase	6	196	2.62e-14	IPR036452	Ribonucleoside hydrolase-like
A0A024GVU8	549	Pfam	PF14008	Iron/zinc purple acid phosphatase-like protein C	482	542	1.7e-11	IPR025733	Iron/zinc purple acid phosphatase-like C-terminal domain
A0A024GVU8	549	Gene3D	G3DSA:3.60.21.10	-	236	547	1.6e-75	IPR029052	Metallo-dependent phosphatase-like
A0A024GVU8	549	Pfam	PF16656	Purple acid Phosphatase, N-terminal domain	123	227	2.8e-18	IPR015914	Purple acid phosphatase, N-terminal
A0A024GVU8	549	SUPERFAMILY	SSF49363	Purple acid phosphatase, N-terminal domain	112	231	5.75e-24	IPR008963	Purple acid phosphatase-like, N-terminal
A0A024GVU8	549	Gene3D	G3DSA:2.60.40.380	-	122	232	3e-16	-	-
A0A024GVU8	549	Pfam	PF00149	Calcineurin-like phosphoesterase	239	464	7.3e-18	IPR004843	Calcineurin-like phosphoesterase domain, ApaH type
A0A024GVU8	549	SUPERFAMILY	SSF56300	Metallo-dependent phosphatases	238	540	7.6e-46	IPR029052	Metallo-dependent phosphatase-like
A0A024GV84	326	Gene3D	G3DSA:3.40.50.2020	-	101	324	1.3e-73	IPR029057	Phosphoribosyltransferase-like
A0A024GV84	326	SUPERFAMILY	SSF53271	PRTase-like	115	320	5.11e-46	IPR029057	Phosphoribosyltransferase-like
A0A024GV84	326	Pfam	PF00156	Phosphoribosyl transferase domain	149	301	4.7e-25	IPR000836	Phosphoribosyltransferase domain
A0A024GK86	389	Gene3D	G3DSA:2.160.20.120	-	166	336	4.8e-18	-	-
A0A024FZ14	532	Gene3D	G3DSA:1.10.1280.10	-	1	314	5.2e-43	IPR008922	Di-copper centre-containing domain superfamily
A0A024FZ14	532	Pfam	PF00264	Common central domain of tyrosinase	61	266	1.6e-22	IPR002227	Tyrosinase copper-binding domain
A0A024FZ14	532	SUPERFAMILY	SSF48056	Di-copper centre-containing domain	31	266	8.18e-30	IPR008922	Di-copper centre-containing domain superfamily
A0A024FXU1	279	SUPERFAMILY	SSF53590	Nucleoside hydrolase	68	128	1.83e-05	IPR036452	Ribonucleoside hydrolase-like
A0A024GM69	420	Gene3D	G3DSA:1.20.1440.320	-	51	209	6.2e-10	-	-
A0A024GM69	420	Gene3D	G3DSA:3.40.50.1000	-	43	232	6.2e-10	IPR023214	HAD superfamily
A0A024G6B3	386	SUPERFAMILY	SSF56784	HAD-like	32	299	1.63e-05	IPR036412	HAD-like superfamily
A0A024G6B3	386	Gene3D	G3DSA:3.40.50.1000	-	184	371	4.7e-12	IPR023214	HAD superfamily
A0A024GEG3	519	SUPERFAMILY	SSF55797	PR-1-like	243	368	4.19e-16	IPR035940	CAP superfamily
A0A024GEG3	519	Pfam	PF00188	Cysteine-rich secretory protein family	251	367	1.2e-08	IPR014044	CAP domain
A0A024GEG3	519	Pfam	PF00188	Cysteine-rich secretory protein family	13	128	2.3e-06	IPR014044	CAP domain
A0A024GEG3	519	Gene3D	G3DSA:3.40.33.10	CAP	2	128	5e-26	IPR035940	CAP superfamily
A0A024GEG3	519	Gene3D	G3DSA:3.40.33.10	CAP	145	367	4e-32	IPR035940	CAP superfamily
A0A024GEG3	519	SUPERFAMILY	SSF55797	PR-1-like	5	129	1.7e-13	IPR035940	CAP superfamily
A0A024G9F1	343	Gene3D	G3DSA:2.10.25.10	Laminin	151	189	1.7e-06	-	-
A0A024G9F1	343	SUPERFAMILY	SSF57196	EGF/Laminin	154	188	4.35e-05	-	-
A0A024G9F1	343	Pfam	PF00008	EGF-like domain	153	184	0.00011	IPR000742	EGF-like domain
A0A024GIT2	604	Pfam	PF04910	Transcriptional repressor TCF25	225	546	3.5e-67	IPR006994	TCF25/Rqc1
A0A024FV66	382	SUPERFAMILY	SSF53590	Nucleoside hydrolase	86	255	6.45e-05	IPR036452	Ribonucleoside hydrolase-like
A0A024FV66	382	Gene3D	G3DSA:3.90.245.10	-	3	300	1.8e-06	IPR036452	Ribonucleoside hydrolase-like
A0A024GTY2	202	Pfam	PF14295	PAN domain	129	172	3.7e-09	IPR003609	PAN/Apple domain
A0A024GTY2	202	Pfam	PF00024	PAN domain	5	66	2.9e-08	IPR003609	PAN/Apple domain
A0A024GTY2	202	Gene3D	G3DSA:3.50.4.10	Hepatocyte Growth Factor	4	93	4.7e-12	-	-
A0A024GTY2	202	Gene3D	G3DSA:3.50.4.10	Hepatocyte Growth Factor	118	192	2.7e-12	-	-
A0A024GDX4	424	Gene3D	G3DSA:3.40.50.200	Peptidase S8/S53 domain	119	423	1.1e-77	IPR036852	Peptidase S8/S53 domain superfamily
A0A024GDX4	424	Pfam	PF00082	Subtilase family	145	418	6.7e-51	IPR000209	Peptidase S8/S53 domain
A0A024GDX4	424	SUPERFAMILY	SSF52743	Subtilisin-like	126	422	9.69e-70	IPR036852	Peptidase S8/S53 domain superfamily
A0A024FUV0	180	Pfam	PF00024	PAN domain	125	161	7.9e-05	IPR003609	PAN/Apple domain
A0A024G7P2	345	SUPERFAMILY	SSF57196	EGF/Laminin	149	189	4.05e-06	-	-
A0A024G7P2	345	Gene3D	G3DSA:2.10.25.10	Laminin	227	305	2.5e-05	-	-
A0A024G7P2	345	Gene3D	G3DSA:2.10.25.10	Laminin	146	226	1.3e-06	-	-
A0A024G7P2	345	Pfam	PF00008	EGF-like domain	150	186	0.00012	IPR000742	EGF-like domain
A0A024GBH6	299	SUPERFAMILY	SSF56784	HAD-like	21	276	8.12e-06	IPR036412	HAD-like superfamily
A0A024GNR7	492	SUPERFAMILY	SSF51445	(Trans)glycosidases	2	261	5.54e-32	IPR017853	Glycoside hydrolase superfamily
A0A024GNR7	492	Gene3D	G3DSA:3.20.20.80	Glycosidases	165	268	8.2e-11	-	-
A0A024G0M2	424	Pfam	PF02800	Glyceraldehyde 3-phosphate dehydrogenase, C-terminal domain	243	402	8.7e-68	IPR020829	Glyceraldehyde 3-phosphate dehydrogenase, catalytic domain
A0A024G0M2	424	SUPERFAMILY	SSF51735	NAD(P)-binding Rossmann-fold domains	90	254	2e-71	IPR036291	NAD(P)-binding domain superfamily
A0A024G0M2	424	SUPERFAMILY	SSF55347	Glyceraldehyde-3-phosphate dehydrogenase-like, C-terminal domain	237	402	2.49e-77	-	-
A0A024G0M2	424	Pfam	PF00044	Glyceraldehyde 3-phosphate dehydrogenase, NAD binding domain	90	189	1.8e-38	IPR020828	Glyceraldehyde 3-phosphate dehydrogenase, NAD(P) binding domain
A0A024G0M2	424	Gene3D	G3DSA:3.40.50.720	-	91	416	4.6e-162	-	-
A0A024G0M2	424	Gene3D	G3DSA:3.30.360.10	Dihydrodipicolinate Reductase; domain 2	236	406	4.6e-162	-	-
A0A024G5P0	414	Gene3D	G3DSA:3.40.50.1000	-	177	410	2e-10	IPR023214	HAD superfamily
A0A024G4X7	564	Pfam	PF00394	Multicopper oxidase	134	279	5.3e-34	IPR001117	Multicopper oxidase, second cupredoxin domain
A0A024G4X7	564	Pfam	PF07732	Multicopper oxidase	14	123	1e-27	IPR011707	Multicopper oxidase, N-terminal
A0A024G4X7	564	Pfam	PF07731	Multicopper oxidase	382	524	5.1e-20	IPR011706	Multicopper oxidase, C-terminal
A0A024G4X7	564	SUPERFAMILY	SSF49503	Cupredoxins	8	156	1.1e-28	IPR008972	Cupredoxin
A0A024G4X7	564	SUPERFAMILY	SSF49503	Cupredoxins	346	528	6.97e-20	IPR008972	Cupredoxin
A0A024G4X7	564	Gene3D	G3DSA:2.60.40.420	-	1	122	1.1e-31	IPR008972	Cupredoxin
A0A024G4X7	564	SUPERFAMILY	SSF49503	Cupredoxins	131	313	1.3e-37	IPR008972	Cupredoxin
A0A024G4X7	564	Gene3D	G3DSA:2.60.40.420	-	130	334	2.4e-43	IPR008972	Cupredoxin
A0A024G4X7	564	Gene3D	G3DSA:2.60.40.420	-	343	556	1.2e-28	IPR008972	Cupredoxin
A0A024FTB3	338	SUPERFAMILY	SSF50630	Acid proteases	188	310	1.22e-07	IPR021109	Aspartic peptidase domain superfamily
A0A024FTB3	338	Pfam	PF00026	Eukaryotic aspartyl protease	214	309	0.00014	IPR033121	Peptidase family A1 domain
A0A024FTB3	338	Gene3D	G3DSA:2.40.70.10	Acid Proteases	183	318	2.5e-08	IPR021109	Aspartic peptidase domain superfamily
A0A024GQ10	202	Pfam	PF00964	Elicitin	59	149	4.3e-07	IPR002200	Elicitin
A0A024GP19	205	Gene3D	G3DSA:3.40.50.300	-	1	204	1.5e-67	IPR027417	P-loop containing nucleoside triphosphate hydrolase
A0A024GP19	205	SUPERFAMILY	SSF52540	P-loop containing nucleoside triphosphate hydrolases	7	199	1.31e-38	IPR027417	P-loop containing nucleoside triphosphate hydrolase
A0A024GP19	205	Pfam	PF01121	Dephospho-CoA kinase	6	188	2.4e-52	IPR001977	Dephospho-CoA kinase
A0A024FZQ6	345	Gene3D	G3DSA:3.40.50.1000	-	153	343	7.5e-13	IPR023214	HAD superfamily
A0A024FZQ6	345	SUPERFAMILY	SSF56784	HAD-like	150	301	3.93e-11	IPR036412	HAD-like superfamily
A0A024GRV9	226	Gene3D	G3DSA:1.10.2000.10	-	49	175	2.8e-07	IPR036790	Frizzled cysteine-rich domain superfamily
A0A024GRV9	226	SUPERFAMILY	SSF63501	Frizzled cysteine-rich domain	96	143	2.75e-06	IPR036790	Frizzled cysteine-rich domain superfamily
A0A024GQB9	202	Pfam	PF18271	Glycoside hydrolase 131 catalytic N-terminal domain	5	181	6.7e-18	IPR041524	Glycoside hydrolase 131, catalytic N-terminal
A0A024GQB9	202	Gene3D	G3DSA:2.60.120.1160	-	5	193	1e-31	-	-
A0A024GV30	637	Gene3D	G3DSA:3.90.640.10	Actin; Chain A, domain 4	233	316	4.8e-174	-	-
A0A024GV30	637	Gene3D	G3DSA:1.20.1270.10	-	544	616	7.5e-29	IPR029048	Heat shock protein 70kD, C-terminal domain superfamily
A0A024GV30	637	SUPERFAMILY	SSF100934	Heat shock protein 70kD (HSP70), C-terminal subdomain	541	621	6.67e-26	IPR029048	Heat shock protein 70kD, C-terminal domain superfamily
A0A024GV30	637	Gene3D	G3DSA:3.30.420.40	-	192	367	4.8e-174	-	-
A0A024GV30	637	SUPERFAMILY	SSF53067	Actin-like ATPase domain	194	384	1.12e-63	IPR043129	ATPase, nucleotide binding domain
A0A024GV30	637	SUPERFAMILY	SSF53067	Actin-like ATPase domain	7	191	4.86e-70	IPR043129	ATPase, nucleotide binding domain
A0A024GV30	637	Gene3D	G3DSA:2.60.34.10	Substrate Binding Domain Of DNAk; Chain A, domain 1	391	543	2.5e-70	IPR029047	Heat shock protein 70kD, peptide-binding domain superfamily
A0A024GV30	637	Pfam	PF00012	Hsp70 protein	9	615	1.7e-249	IPR013126	Heat shock protein 70 family
A0A024GV30	637	SUPERFAMILY	SSF100920	Heat shock protein 70kD (HSP70), peptide-binding domain	393	547	6.54e-61	IPR029047	Heat shock protein 70kD, peptide-binding domain superfamily
A0A024GV30	637	Gene3D	G3DSA:3.30.420.40	-	10	382	4.8e-174	-	-
A0A024G6P2	254	SUPERFAMILY	SSF51445	(Trans)glycosidases	96	253	1.67e-24	IPR017853	Glycoside hydrolase superfamily
A0A024G6P2	254	Gene3D	G3DSA:3.20.20.80	Glycosidases	84	254	3.3e-25	-	-
A0A024G0C6	316	Gene3D	G3DSA:2.10.25.10	Laminin	171	226	9e-06	-	-
A0A024GIG4	297	Gene3D	G3DSA:3.40.50.880	-	1	285	1.4e-88	IPR029062	Class I glutamine amidotransferase-like
A0A024GIG4	297	Pfam	PF07722	Peptidase C26	14	208	9.5e-15	IPR011697	Peptidase C26
A0A024GIG4	297	SUPERFAMILY	SSF52317	Class I glutamine amidotransferase-like	3	280	3e-33	IPR029062	Class I glutamine amidotransferase-like
A0A024GFS3	431	Gene3D	G3DSA:3.20.20.80	Glycosidases	1	358	9.4e-85	-	-
A0A024GFS3	431	SUPERFAMILY	SSF51445	(Trans)glycosidases	38	302	1.38e-25	IPR017853	Glycoside hydrolase superfamily
A0A024GFS3	431	Pfam	PF03198	Glucanosyltransferase	2	302	2.4e-50	IPR004886	Glucanosyltransferase
A0A024GGA2	315	SUPERFAMILY	SSF50630	Acid proteases	186	309	5e-08	IPR021109	Aspartic peptidase domain superfamily
A0A024GGA2	315	Gene3D	G3DSA:2.40.70.10	Acid Proteases	135	313	2.1e-09	IPR021109	Aspartic peptidase domain superfamily
A0A024G1K6	418	Gene3D	G3DSA:3.30.40.240	Transglutaminase elicitor, body domain	93	175	7.5e-13	-	-
A0A024G1K6	418	Pfam	PF16683	Transglutaminase elicitor	54	415	2.8e-107	IPR032048	Transglutaminase elicitor
A0A024G9A0	486	Gene3D	G3DSA:3.40.30.10	Glutaredoxin	123	221	3e-14	-	-
A0A024G9A0	486	SUPERFAMILY	SSF52833	Thioredoxin-like	362	469	1.72e-29	IPR036249	Thioredoxin-like superfamily
A0A024G9A0	486	Gene3D	G3DSA:3.40.30.10	Glutaredoxin	1	122	1.4e-33	-	-
A0A024G9A0	486	SUPERFAMILY	SSF52833	Thioredoxin-like	221	353	1.86e-12	IPR036249	Thioredoxin-like superfamily
A0A024G9A0	486	Pfam	PF13848	Thioredoxin-like domain	151	317	5.8e-27	-	-
A0A024G9A0	486	SUPERFAMILY	SSF52833	Thioredoxin-like	128	232	2.75e-11	IPR036249	Thioredoxin-like superfamily
A0A024G9A0	486	Gene3D	G3DSA:3.40.30.10	Glutaredoxin	350	479	2.1e-36	-	-
A0A024G9A0	486	SUPERFAMILY	SSF52833	Thioredoxin-like	7	123	5.74e-33	IPR036249	Thioredoxin-like superfamily
A0A024G9A0	486	Gene3D	G3DSA:3.40.30.10	Glutaredoxin	222	349	4.8e-31	-	-
A0A024G9A0	486	Pfam	PF00085	Thioredoxin	362	466	4.3e-26	IPR013766	Thioredoxin domain
A0A024G9A0	486	Pfam	PF00085	Thioredoxin	15	120	1.2e-24	IPR013766	Thioredoxin domain
A0A024GSF9	710	Pfam	PF08450	SMP-30/Gluconolactonase/LRE-like region	381	677	3.9e-11	IPR013658	SMP-30/Gluconolactonase/LRE-like region
A0A024GSF9	710	SUPERFAMILY	SSF63829	Calcium-dependent phosphotriesterase	381	688	1.29e-20	-	-
A0A024GSF9	710	Gene3D	G3DSA:2.120.10.30	-	375	692	2.3e-39	IPR011042	Six-bladed beta-propeller, TolB-like
A0A024GGT6	308	Gene3D	G3DSA:2.40.70.10	Acid Proteases	133	295	3.5e-09	IPR021109	Aspartic peptidase domain superfamily
A0A024GGT6	308	SUPERFAMILY	SSF50630	Acid proteases	178	283	1.1e-08	IPR021109	Aspartic peptidase domain superfamily
A0A024G8R5	247	SUPERFAMILY	SSF51069	Carbonic anhydrase	5	242	6.66e-48	IPR036398	Alpha carbonic anhydrase domain superfamily
A0A024G8R5	247	Gene3D	G3DSA:3.10.200.10	Alpha carbonic anhydrase	5	245	4.2e-52	IPR036398	Alpha carbonic anhydrase domain superfamily
A0A024G8R5	247	Pfam	PF00194	Eukaryotic-type carbonic anhydrase	15	241	1.5e-36	IPR001148	Alpha carbonic anhydrase domain
A0A024FTB6	277	Pfam	PF02815	MIR domain	100	263	4.9e-16	IPR016093	MIR motif
A0A024FTB6	277	SUPERFAMILY	SSF82109	MIR domain	80	274	1.44e-48	IPR036300	Mir domain superfamily
A0A024FTB6	277	Gene3D	G3DSA:2.80.10.50	-	66	277	1.3e-57	-	-
A0A024G109	398	Gene3D	G3DSA:3.20.20.80	Glycosidases	29	398	3.6e-77	-	-
A0A024G109	398	Pfam	PF00150	Cellulase (glycosyl hydrolase family 5)	96	375	8.3e-28	IPR001547	Glycoside hydrolase, family 5
A0A024G109	398	SUPERFAMILY	SSF51445	(Trans)glycosidases	38	397	1.11e-63	IPR017853	Glycoside hydrolase superfamily
A0A024GKU5	299	Gene3D	G3DSA:1.10.220.150	Arf GTPase activating protein	1	54	9.4e-08	IPR038508	ArfGAP domain superfamily
A0A024GKU5	299	SUPERFAMILY	SSF57863	ArfGap/RecO-like zinc finger	3	47	5.75e-05	IPR037278	ARFGAP/RecO-like zinc finger
A0A024GKU5	299	Gene3D	G3DSA:2.60.40.150	C2 domain	91	235	2.7e-12	IPR035892	C2 domain superfamily
A0A024GKU5	299	Pfam	PF00168	C2 domain	108	192	2.8e-10	IPR000008	C2 domain
A0A024GKU5	299	SUPERFAMILY	SSF49562	C2 domain (Calcium/lipid-binding domain, CaLB)	103	192	4.99e-16	IPR035892	C2 domain superfamily
A0A024GK75	192	Gene3D	G3DSA:3.40.50.1820	alpha/beta hydrolase	9	190	6.9e-62	IPR029058	Alpha/Beta hydrolase fold
A0A024GK75	192	SUPERFAMILY	SSF53474	alpha/beta-Hydrolases	12	182	2.7e-26	IPR029058	Alpha/Beta hydrolase fold
A0A024FVU0	259	Gene3D	G3DSA:2.40.70.10	Acid Proteases	92	240	6.7e-08	IPR021109	Aspartic peptidase domain superfamily
A0A024FVU0	259	SUPERFAMILY	SSF50630	Acid proteases	131	236	1.23e-07	IPR021109	Aspartic peptidase domain superfamily
A0A024G1T6	387	Pfam	PF16683	Transglutaminase elicitor	21	385	1.8e-113	IPR032048	Transglutaminase elicitor
A0A024G1T6	387	Gene3D	G3DSA:3.30.40.240	Transglutaminase elicitor, body domain	62	144	7.5e-23	-	-
A0A024FT20	444	Gene3D	G3DSA:2.70.100.10	Glycoside hydrolase, family 7, domain	2	443	2.9e-155	IPR037019	Glycoside hydrolase family 7, catalytic domain superfamily
A0A024FT20	444	Pfam	PF00840	Glycosyl hydrolase family 7	8	440	6e-147	IPR001722	Glycoside hydrolase, family 7
A0A024FT20	444	SUPERFAMILY	SSF49899	Concanavalin A-like lectins/glucanases	8	440	1.5e-133	IPR013320	Concanavalin A-like lectin/glucanase domain superfamily
A0A024FX61	220	SUPERFAMILY	SSF49493	HSP40/DnaJ peptide-binding domain	101	193	2.53e-06	IPR008971	HSP40/DnaJ peptide-binding
A0A024FX61	220	SUPERFAMILY	SSF46565	Chaperone J-domain	21	83	2.75e-11	IPR036869	Chaperone J-domain superfamily
A0A024FX61	220	Pfam	PF01556	DnaJ C terminal domain	105	203	2.4e-11	IPR002939	Chaperone DnaJ, C-terminal
A0A024FX61	220	Gene3D	G3DSA:2.60.260.20	-	104	180	1.7e-08	-	-
A0A024FX61	220	Gene3D	G3DSA:1.10.287.110	DnaJ domain	10	103	9.2e-12	IPR036869	Chaperone J-domain superfamily
A0A024FX61	220	Pfam	PF00226	DnaJ domain	21	57	5.4e-08	IPR001623	DnaJ domain
A0A024G125	464	Pfam	PF00328	Histidine phosphatase superfamily (branch 2)	57	409	1.4e-28	IPR000560	Histidine phosphatase superfamily, clade-2
A0A024G125	464	Gene3D	G3DSA:3.40.50.1240	-	17	454	1.3e-82	IPR029033	Histidine phosphatase superfamily
A0A024G125	464	SUPERFAMILY	SSF53254	Phosphoglycerate mutase-like	50	462	3.36e-57	IPR029033	Histidine phosphatase superfamily
A0A024GC73	940	Pfam	PF13884	Chaperone of endosialidase	823	881	1.9e-11	IPR030392	Intramolecular chaperone auto-processing domain
A0A024GC73	940	Gene3D	G3DSA:1.10.10.10	-	812	932	4.8e-05	IPR036388	Winged helix-like DNA-binding domain superfamily
A0A024FUS4	181	Gene3D	G3DSA:3.50.4.10	Hepatocyte Growth Factor	107	177	2.2e-06	-	-
A0A024FUS4	181	Pfam	PF00024	PAN domain	131	162	1.5e-05	IPR003609	PAN/Apple domain
A0A024G4N0	717	Pfam	PF03446	NAD binding domain of 6-phosphogluconate dehydrogenase	439	584	7.7e-28	IPR006115	6-phosphogluconate dehydrogenase, NADP-binding
A0A024G4N0	717	SUPERFAMILY	SSF51735	NAD(P)-binding Rossmann-fold domains	439	585	1.29e-23	IPR036291	NAD(P)-binding domain superfamily
A0A024G4N0	717	SUPERFAMILY	SSF48179	6-phosphogluconate dehydrogenase C-terminal domain-like	585	716	3.06e-33	IPR008927	6-phosphogluconate dehydrogenase-like, C-terminal domain superfamily
A0A024G4N0	717	Gene3D	G3DSA:3.40.50.720	-	433	586	3.4e-36	-	-
A0A024G4N0	717	Gene3D	G3DSA:2.40.10.10	-	217	332	4.2e-13	IPR043504	Peptidase S1, PA clan, chymotrypsin-like fold
A0A024G4N0	717	Gene3D	G3DSA:2.40.10.10	-	333	414	4.2e-13	IPR043504	Peptidase S1, PA clan, chymotrypsin-like fold
A0A024G4N0	717	Pfam	PF13365	Trypsin-like peptidase domain	235	409	3.8e-12	-	-
A0A024G4N0	717	Gene3D	G3DSA:1.10.1040.10	-	587	717	2e-39	IPR013328	6-phosphogluconate dehydrogenase, domain 2
A0A024G4N0	717	Pfam	PF14833	NAD-binding of NADP-dependent 3-hydroxyisobutyrate dehydrogenase	587	712	6.2e-27	IPR029154	3-hydroxyisobutyrate dehydrogenase-like, NAD-binding domain
A0A024G4N0	717	SUPERFAMILY	SSF50494	Trypsin-like serine proteases	217	422	7.81e-17	IPR009003	Peptidase S1, PA clan
A0A024GLW8	135	Pfam	PF07648	Kazal-type serine protease inhibitor domain	22	56	0.00014	IPR002350	Kazal domain
A0A024GLW8	135	SUPERFAMILY	SSF100895	Kazal-type serine protease inhibitors	20	56	1.94e-05	IPR036058	Kazal domain superfamily
A0A024GLW8	135	Gene3D	G3DSA:3.30.60.30	-	18	58	8.1e-06	-	-
A0A024FTD0	258	SUPERFAMILY	SSF50630	Acid proteases	116	243	2.16e-10	IPR021109	Aspartic peptidase domain superfamily
A0A024FTD0	258	Pfam	PF00026	Eukaryotic aspartyl protease	147	242	7.1e-06	IPR033121	Peptidase family A1 domain
A0A024FTD0	258	Gene3D	G3DSA:2.40.70.10	Acid Proteases	89	257	8.4e-12	IPR021109	Aspartic peptidase domain superfamily
A0A024GJD3	179	SUPERFAMILY	SSF48647	Fungal elicitin	19	79	8.37e-07	IPR036470	Elicitin superfamily
A0A024GJD3	179	Gene3D	G3DSA:1.10.239.10	Elicitin domain	2	88	3.4e-10	IPR036470	Elicitin superfamily
A0A024GJD3	179	Pfam	PF00964	Elicitin	19	85	5e-09	IPR002200	Elicitin
A0A024G2Y3	442	Gene3D	G3DSA:2.40.10.10	-	183	302	3.1e-08	IPR043504	Peptidase S1, PA clan, chymotrypsin-like fold
A0A024G2Y3	442	Pfam	PF13365	Trypsin-like peptidase domain	190	390	5.4e-15	-	-
A0A024G2Y3	442	Gene3D	G3DSA:2.40.10.10	-	303	416	1.8e-10	IPR043504	Peptidase S1, PA clan, chymotrypsin-like fold
A0A024G2Y3	442	SUPERFAMILY	SSF50494	Trypsin-like serine proteases	157	424	1.37e-22	IPR009003	Peptidase S1, PA clan
A0A024GN06	167	SUPERFAMILY	SSF53474	alpha/beta-Hydrolases	2	158	1.27e-33	IPR029058	Alpha/Beta hydrolase fold
A0A024GN06	167	Gene3D	G3DSA:3.40.50.1820	alpha/beta hydrolase	1	165	1.3e-47	IPR029058	Alpha/Beta hydrolase fold
A0A024GN06	167	Pfam	PF01083	Cutinase	1	159	1.6e-34	IPR000675	Cutinase/acetylxylan esterase
A0A024GMV3	167	SUPERFAMILY	SSF53474	alpha/beta-Hydrolases	2	158	1.27e-33	IPR029058	Alpha/Beta hydrolase fold
A0A024GMV3	167	Gene3D	G3DSA:3.40.50.1820	alpha/beta hydrolase	1	165	1.3e-47	IPR029058	Alpha/Beta hydrolase fold
A0A024GMV3	167	Pfam	PF01083	Cutinase	1	159	1.6e-34	IPR000675	Cutinase/acetylxylan esterase
A0A024GDW1	147	SUPERFAMILY	SSF68906	SAP domain	104	143	2.29e-10	IPR036361	SAP domain superfamily
A0A024GDW1	147	Pfam	PF10208	ARMET, C-terminal	105	144	1.7e-14	IPR019345	ARMET, C-terminal
A0A024GDW1	147	Pfam	PF20145	ARMET, N-terminal	14	100	2.1e-09	IPR045332	ARMET, N-terminal
A0A024GDW1	147	Gene3D	G3DSA:1.10.720.30	SAP domain	103	146	2.6e-16	IPR036361	SAP domain superfamily
A0A024GDW1	147	Gene3D	G3DSA:1.10.225.10	-	10	102	3.4e-18	-	-
A0A024GQA3	551	Pfam	PF03133	Tubulin-tyrosine ligase family	81	396	6.6e-23	IPR004344	Tubulin-tyrosine ligase/Tubulin polyglutamylase
A0A024GQA3	551	Gene3D	G3DSA:3.30.470.20	-	172	412	1.1e-25	-	-
A0A024GQA3	551	Gene3D	G3DSA:2.10.25.10	Laminin	505	535	6.7e-07	-	-
A0A024G545	419	Gene3D	G3DSA:3.20.20.80	Glycosidases	117	414	1.8e-29	-	-
A0A024G545	419	SUPERFAMILY	SSF51445	(Trans)glycosidases	122	381	3.37e-25	IPR017853	Glycoside hydrolase superfamily
A0A024GSG7	285	Gene3D	G3DSA:3.40.50.850	-	20	273	1.2e-45	IPR036380	Isochorismatase-like superfamily
A0A024GSG7	285	SUPERFAMILY	SSF52499	Isochorismatase-like hydrolases	20	273	7.33e-17	IPR036380	Isochorismatase-like superfamily
A0A024GTB8	449	SUPERFAMILY	SSF53474	alpha/beta-Hydrolases	14	281	2.58e-27	IPR029058	Alpha/Beta hydrolase fold
A0A024GTB8	449	Gene3D	G3DSA:3.40.50.1820	alpha/beta hydrolase	13	402	4.8e-86	IPR029058	Alpha/Beta hydrolase fold
A0A024GH82	566	Gene3D	G3DSA:3.30.870.10	Endonuclease Chain A	326	484	3.2e-13	-	-
A0A024GH82	566	Pfam	PF13091	PLD-like domain	358	482	5.5e-10	IPR025202	Phospholipase D-like domain
A0A024GH82	566	SUPERFAMILY	SSF56024	Phospholipase D/nuclease	80	280	3.45e-13	-	-
A0A024GH82	566	Gene3D	G3DSA:3.30.870.10	Endonuclease Chain A	89	299	1.1e-13	-	-
A0A024GH82	566	SUPERFAMILY	SSF56024	Phospholipase D/nuclease	352	483	2.75e-18	-	-
A0A024GKR4	214	Pfam	PF00964	Elicitin	49	139	7.9e-09	IPR002200	Elicitin
A0A024GKR4	214	SUPERFAMILY	SSF48647	Fungal elicitin	56	140	1.83e-05	IPR036470	Elicitin superfamily
A0A024GPF8	452	Gene3D	G3DSA:2.120.10.30	-	171	441	5.7e-19	IPR011042	Six-bladed beta-propeller, TolB-like
A0A024GPF8	452	SUPERFAMILY	SSF63825	YWTD domain	194	413	1.26e-17	-	-
A0A024G828	407	Gene3D	G3DSA:1.10.287.110	DnaJ domain	3	125	3.7e-31	IPR036869	Chaperone J-domain superfamily
A0A024G828	407	SUPERFAMILY	SSF46565	Chaperone J-domain	3	102	2.36e-30	IPR036869	Chaperone J-domain superfamily
A0A024G828	407	Pfam	PF00226	DnaJ domain	6	70	1.4e-24	IPR001623	DnaJ domain
A0A024G828	407	SUPERFAMILY	SSF52833	Thioredoxin-like	159	262	6.66e-13	IPR036249	Thioredoxin-like superfamily
A0A024G828	407	Gene3D	G3DSA:3.40.30.10	Glutaredoxin	268	398	7.1e-07	-	-
A0A024G828	407	Gene3D	G3DSA:3.40.30.10	Glutaredoxin	160	265	6.6e-14	-	-
A0A024G0S2	529	Pfam	PF10516	SHNi-TPR	249	278	2.7e-07	IPR019544	Tetratricopeptide, SHNi-TPR domain
A0A024G0S2	529	Gene3D	G3DSA:1.25.40.10	Tetratricopeptide repeat domain	107	330	5.3e-17	IPR011990	Tetratricopeptide-like helical domain superfamily
A0A024G0S2	529	SUPERFAMILY	SSF48452	TPR-like	115	287	4.34e-07	IPR011990	Tetratricopeptide-like helical domain superfamily
A0A024FTD4	463	Pfam	PF03198	Glucanosyltransferase	3	305	5e-43	IPR004886	Glucanosyltransferase
A0A024FTD4	463	Gene3D	G3DSA:3.20.20.80	Glycosidases	1	363	8.9e-82	-	-
A0A024FTD4	463	SUPERFAMILY	SSF51445	(Trans)glycosidases	5	302	1.62e-20	IPR017853	Glycoside hydrolase superfamily
A0A024GLV4	210	Pfam	PF00964	Elicitin	63	153	2.8e-07	IPR002200	Elicitin
A0A024GLX7	468	SUPERFAMILY	SSF46565	Chaperone J-domain	355	464	3.53e-31	IPR036869	Chaperone J-domain superfamily
A0A024GLX7	468	Gene3D	G3DSA:1.10.287.110	DnaJ domain	359	467	1.9e-29	IPR036869	Chaperone J-domain superfamily
A0A024GLX7	468	Gene3D	G3DSA:1.25.40.10	Tetratricopeptide repeat domain	2	358	4e-75	IPR011990	Tetratricopeptide-like helical domain superfamily
A0A024GLX7	468	Pfam	PF13181	Tetratricopeptide repeat	309	338	0.17	IPR019734	Tetratricopeptide repeat
A0A024GLX7	468	SUPERFAMILY	SSF48452	TPR-like	18	371	1.04e-23	IPR011990	Tetratricopeptide-like helical domain superfamily
A0A024GLX7	468	Pfam	PF00226	DnaJ domain	361	428	1.9e-25	IPR001623	DnaJ domain
A0A024G5B3	596	Gene3D	G3DSA:2.115.10.20	Glycosyl hydrolase domain; family 43	1	396	1e-102	IPR023296	Glycosyl hydrolase, five-bladed beta-propellor domain superfamily
A0A024G5B3	596	Pfam	PF08244	Glycosyl hydrolases family 32 C terminal	405	565	2e-26	IPR013189	Glycosyl hydrolase family 32, C-terminal
A0A024G5B3	596	Pfam	PF00251	Glycosyl hydrolases family 32 N-terminal domain	18	345	4.3e-47	IPR013148	Glycosyl hydrolase family 32, N-terminal
A0A024G5B3	596	SUPERFAMILY	SSF75005	Arabinanase/levansucrase/invertase	11	346	1.57e-64	IPR023296	Glycosyl hydrolase, five-bladed beta-propellor domain superfamily
A0A024G5B3	596	Gene3D	G3DSA:2.60.120.560	-	403	592	6.1e-35	-	-
A0A024G5B3	596	SUPERFAMILY	SSF49899	Concanavalin A-like lectins/glucanases	389	565	2.14e-20	IPR013320	Concanavalin A-like lectin/glucanase domain superfamily
A0A024G4U0	354	Pfam	PF00295	Glycosyl hydrolases family 28	25	347	4.1e-82	IPR000743	Glycoside hydrolase, family 28
A0A024G4U0	354	Gene3D	G3DSA:2.160.20.10	-	6	348	1e-81	IPR012334	Pectin lyase fold
A0A024G4U0	354	SUPERFAMILY	SSF51126	Pectin lyase-like	19	346	9.57e-71	IPR011050	Pectin lyase fold/virulence factor
A0A024G5F3	346	Pfam	PF00295	Glycosyl hydrolases family 28	26	331	1.2e-64	IPR000743	Glycoside hydrolase, family 28
A0A024G5F3	346	Gene3D	G3DSA:2.160.20.10	-	6	338	8.3e-71	IPR012334	Pectin lyase fold
A0A024G5F3	346	SUPERFAMILY	SSF51126	Pectin lyase-like	24	332	4.65e-52	IPR011050	Pectin lyase fold/virulence factor
A0A024GEW8	70	Pfam	PF00050	Kazal-type serine protease inhibitor domain	6	36	6.6e-08	IPR002350	Kazal domain
A0A024GEW8	70	Gene3D	G3DSA:3.30.60.30	-	8	53	2.2e-10	-	-
A0A024GEW8	70	SUPERFAMILY	SSF100895	Kazal-type serine protease inhibitors	6	51	4.02e-11	IPR036058	Kazal domain superfamily
A0A024FX48	412	Pfam	PF01341	Glycosyl hydrolases family 6	20	291	5.7e-44	IPR016288	1, 4-beta cellobiohydrolase
A0A024FX48	412	Gene3D	G3DSA:3.20.20.40	-	4	317	4.4e-59	IPR036434	1, 4-beta cellobiohydrolase superfamily
A0A024FX48	412	SUPERFAMILY	SSF51989	Glycosyl hydrolases family 6, cellulases	19	316	6.67e-48	IPR036434	1, 4-beta cellobiohydrolase superfamily
A0A024GJP0	491	SUPERFAMILY	SSF81296	E set domains	341	473	3.22e-14	IPR014756	Immunoglobulin E-set
A0A024GJP0	491	Pfam	PF00112	Papain family cysteine protease	100	311	8e-77	IPR000668	Peptidase C1A, papain C-terminal
A0A024GJP0	491	SUPERFAMILY	SSF54001	Cysteine proteinases	7	311	5.42e-102	IPR038765	Papain-like cysteine peptidase superfamily
A0A024GJP0	491	Gene3D	G3DSA:2.60.40.770	-	333	477	1.2e-09	-	-
A0A024GJP0	491	Pfam	PF08246	Cathepsin propeptide inhibitor domain (I29)	10	66	7.3e-08	IPR013201	Cathepsin propeptide inhibitor domain (I29)
A0A024GJP0	491	Gene3D	G3DSA:3.90.70.10	Cysteine proteinases	1	313	3e-108	-	-
A0A024GJP0	491	Pfam	PF02221	ML domain	340	475	7.7e-16	IPR003172	MD-2-related lipid-recognition domain
A0A024GUV5	217	SUPERFAMILY	SSF55797	PR-1-like	5	149	5.76e-09	IPR035940	CAP superfamily
A0A024GUV5	217	Gene3D	G3DSA:3.40.33.10	CAP	3	157	2e-09	IPR035940	CAP superfamily
A0A024G4D2	541	Pfam	PF07731	Multicopper oxidase	383	521	2.6e-30	IPR011706	Multicopper oxidase, C-terminal
A0A024G4D2	541	Gene3D	G3DSA:2.60.40.420	-	127	336	2e-44	IPR008972	Cupredoxin
A0A024G4D2	541	SUPERFAMILY	SSF49503	Cupredoxins	343	526	1.14e-32	IPR008972	Cupredoxin
A0A024G4D2	541	Gene3D	G3DSA:2.60.40.420	-	1	122	2.2e-34	IPR008972	Cupredoxin
A0A024G4D2	541	Pfam	PF07732	Multicopper oxidase	9	123	2.4e-33	IPR011707	Multicopper oxidase, N-terminal
A0A024G4D2	541	Gene3D	G3DSA:2.60.40.420	-	350	541	1.3e-42	IPR008972	Cupredoxin
A0A024G4D2	541	Pfam	PF00394	Multicopper oxidase	133	306	3.5e-30	IPR001117	Multicopper oxidase, second cupredoxin domain
A0A024G4D2	541	SUPERFAMILY	SSF49503	Cupredoxins	3	146	1.19e-32	IPR008972	Cupredoxin
A0A024G4D2	541	SUPERFAMILY	SSF49503	Cupredoxins	129	310	2.82e-34	IPR008972	Cupredoxin
A0A024GFJ2	406	Gene3D	G3DSA:2.60.120.1160	-	8	250	1.9e-32	-	-
A0A024GFJ2	406	Pfam	PF18271	Glycoside hydrolase 131 catalytic N-terminal domain	39	229	9.8e-17	IPR041524	Glycoside hydrolase 131, catalytic N-terminal
A0A024GPM3	542	Pfam	PF00264	Common central domain of tyrosinase	35	238	2.7e-22	IPR002227	Tyrosinase copper-binding domain
A0A024GPM3	542	SUPERFAMILY	SSF48056	Di-copper centre-containing domain	6	249	1.01e-30	IPR008922	Di-copper centre-containing domain superfamily
A0A024GPM3	542	Gene3D	G3DSA:1.10.1280.10	-	3	302	1.1e-42	IPR008922	Di-copper centre-containing domain superfamily
A0A024FVF8	416	Pfam	PF00262	Calreticulin family	4	244	3.6e-55	IPR001580	Calreticulin/calnexin
A0A024FVF8	416	Pfam	PF00262	Calreticulin family	246	320	9.9e-24	IPR001580	Calreticulin/calnexin
A0A024FVF8	416	Gene3D	G3DSA:2.60.120.200	-	1	363	4.9e-67	-	-
A0A024FVF8	416	SUPERFAMILY	SSF63887	P-domain of calnexin/calreticulin	187	294	8.89e-41	IPR009033	Calreticulin/calnexin, P domain superfamily
A0A024FVF8	416	SUPERFAMILY	SSF49899	Concanavalin A-like lectins/glucanases	2	207	1.31e-46	IPR013320	Concanavalin A-like lectin/glucanase domain superfamily
A0A024FVF8	416	Gene3D	G3DSA:2.10.250.10	Calreticulin/calnexin, P domain	191	292	1.1e-37	IPR009033	Calreticulin/calnexin, P domain superfamily
A0A024G6L5	148	Pfam	PF00964	Elicitin	3	89	6.3e-20	IPR002200	Elicitin
A0A024G6L5	148	SUPERFAMILY	SSF48647	Fungal elicitin	3	91	2.09e-20	IPR036470	Elicitin superfamily
A0A024G6L5	148	Gene3D	G3DSA:1.10.239.10	Elicitin domain	1	90	1.1e-22	IPR036470	Elicitin superfamily
A0A024G6C9	148	Pfam	PF00964	Elicitin	3	89	6.3e-20	IPR002200	Elicitin
A0A024G6C9	148	SUPERFAMILY	SSF48647	Fungal elicitin	3	91	2.09e-20	IPR036470	Elicitin superfamily
A0A024G6C9	148	Gene3D	G3DSA:1.10.239.10	Elicitin domain	1	90	1.1e-22	IPR036470	Elicitin superfamily
A0A024GBX7	345	Pfam	PF11397	Glycosyltransferase (GlcNAc)	76	320	5.8e-25	IPR021067	Glycosyltransferase, GlcNAc
A0A024G7B0	190	Gene3D	G3DSA:2.60.120.260	-	97	157	2.2e-06	-	-
A0A024G7B0	190	Gene3D	G3DSA:2.10.25.10	Laminin	65	96	5.1e-05	-	-
A0A024G7B0	190	Pfam	PF07974	EGF-like domain	69	94	1.1e-05	IPR013111	EGF-like domain, extracellular
A0A024GL77	341	Gene3D	G3DSA:3.90.245.10	-	2	304	4.7e-16	IPR036452	Ribonucleoside hydrolase-like
A0A024GL77	341	SUPERFAMILY	SSF53590	Nucleoside hydrolase	6	258	3.01e-12	IPR036452	Ribonucleoside hydrolase-like
A0A024GL77	341	Pfam	PF01156	Inosine-uridine preferring nucleoside hydrolase	10	261	1.2e-11	IPR001910	Inosine/uridine-preferring nucleoside hydrolase domain
A0A024GJQ3	257	Pfam	PF01746	tRNA (Guanine-1)-methyltransferase	84	252	7.3e-27	IPR016009	tRNA methyltransferase TRMD/TRM10-type domain
A0A024GJQ3	257	Gene3D	G3DSA:3.40.1280.30	-	53	252	8.6e-61	IPR038459	tRNA methyltransferase TRM10-type domain superfamily
A0A024FZ13	751	Gene3D	G3DSA:2.70.98.30	-	75	281	8.1e-46	-	-
A0A024FZ13	751	Pfam	PF03639	Glycosyl hydrolase family 81 N-terminal domain	76	378	1.1e-49	IPR040451	Glycosyl hydrolase family 81, N-terminal
A0A024FZ13	751	Gene3D	G3DSA:1.10.287.1170	-	388	451	6.8e-08	-	-
A0A024FZ13	751	Gene3D	G3DSA:1.20.5.420	Immunoglobulin FC, subunit C	696	741	4.7e-17	-	-
A0A024FZ13	751	Pfam	PF17652	Glycosyl hydrolase family 81 C-terminal domain	392	733	1.6e-102	IPR040720	Glycosyl hydrolase family 81, C-terminal domain
A0A024G7E8	476	Gene3D	G3DSA:3.60.21.10	-	80	470	2.6e-24	IPR029052	Metallo-dependent phosphatase-like
A0A024G7E8	476	SUPERFAMILY	SSF56300	Metallo-dependent phosphatases	120	368	2.86e-09	IPR029052	Metallo-dependent phosphatase-like
A0A024G5G7	258	Gene3D	G3DSA:3.20.20.80	Glycosidases	3	93	1.6e-06	-	-
A0A024G5G7	258	Gene3D	G3DSA:3.20.20.80	Glycosidases	160	255	5.2e-06	-	-
A0A024G5G7	258	SUPERFAMILY	SSF51445	(Trans)glycosidases	7	251	2.72e-18	IPR017853	Glycoside hydrolase superfamily
A0A024GEB5	458	Pfam	PF04981	NMD3 family	2	215	9.8e-69	IPR007064	Nmd3, N-terminal
A0A024FV48	263	Gene3D	G3DSA:2.40.70.10	Acid Proteases	103	254	3.4e-09	IPR021109	Aspartic peptidase domain superfamily
A0A024FV48	263	SUPERFAMILY	SSF50630	Acid proteases	147	244	5.94e-09	IPR021109	Aspartic peptidase domain superfamily
A0A024GE28	396	Gene3D	G3DSA:2.10.25.10	Laminin	202	251	9e-06	-	-
A0A024GE28	396	Gene3D	G3DSA:2.10.25.10	Laminin	252	323	6.4e-06	-	-
A0A024GVA3	311	Gene3D	G3DSA:2.40.70.10	Acid Proteases	162	306	6.8e-06	IPR021109	Aspartic peptidase domain superfamily
A0A024GIH4	273	Pfam	PF01746	tRNA (Guanine-1)-methyltransferase	87	268	1.1e-23	IPR016009	tRNA methyltransferase TRMD/TRM10-type domain
A0A024GIH4	273	Gene3D	G3DSA:3.40.1280.30	-	53	268	2.9e-60	IPR038459	tRNA methyltransferase TRM10-type domain superfamily
A0A024G5X0	380	Pfam	PF12710	haloacid dehalogenase-like hydrolase	172	320	3.1e-07	-	-
A0A024G5X0	380	Gene3D	G3DSA:3.40.50.1000	-	208	369	1.2e-15	IPR023214	HAD superfamily
A0A024G5X0	380	SUPERFAMILY	SSF56784	HAD-like	48	321	1.87e-10	IPR036412	HAD-like superfamily
A0A024G9N4	154	Gene3D	G3DSA:3.40.30.10	Glutaredoxin	75	151	9.8e-09	-	-
A0A024G9N4	154	Pfam	PF10262	Rdx family	13	148	4.6e-14	IPR011893	Selenoprotein, Rdx-type
A0A024G9N4	154	SUPERFAMILY	SSF52833	Thioredoxin-like	12	150	1.68e-13	IPR036249	Thioredoxin-like superfamily
A0A024GK84	383	Gene3D	G3DSA:2.40.70.10	Acid Proteases	226	379	1.4e-06	IPR021109	Aspartic peptidase domain superfamily
A0A024GK84	383	SUPERFAMILY	SSF50630	Acid proteases	270	370	1.01e-05	IPR021109	Aspartic peptidase domain superfamily
A0A024G648	339	SUPERFAMILY	SSF56784	HAD-like	190	331	2.78e-05	IPR036412	HAD-like superfamily
A0A024G648	339	Gene3D	G3DSA:3.40.50.1000	-	182	328	1.3e-07	IPR023214	HAD superfamily
A0A024FWQ0	617	SUPERFAMILY	SSF47769	SAM/Pointed domain	84	145	2.09e-07	IPR013761	Sterile alpha motif/pointed domain superfamily
A0A024FWQ0	617	Gene3D	G3DSA:2.60.40.10	Immunoglobulins	354	466	4.7e-13	IPR013783	Immunoglobulin-like fold
A0A024FWQ0	617	Gene3D	G3DSA:1.10.238.180	-	17	82	6.1e-06	-	-
A0A024FWQ0	617	Pfam	PF00041	Fibronectin type III domain	381	450	2.4e-09	IPR003961	Fibronectin type III
A0A024FWQ0	617	Pfam	PF07647	SAM domain (Sterile alpha motif)	84	140	1.7e-07	IPR001660	Sterile alpha motif domain
A0A024FWQ0	617	Gene3D	G3DSA:1.10.150.50	-	85	144	1.1e-11	IPR013761	Sterile alpha motif/pointed domain superfamily
A0A024FWQ0	617	SUPERFAMILY	SSF49265	Fibronectin type III	379	460	2.59e-13	IPR036116	Fibronectin type III superfamily
A0A024FWQ0	617	SUPERFAMILY	SSF47473	EF-hand	15	110	3.59e-07	IPR011992	EF-hand domain pair
A0A024G2S0	350	Gene3D	G3DSA:3.90.550.50	-	31	244	9.1e-38	-	-
A0A024G2S0	350	Pfam	PF02434	Fringe-like	49	235	5.1e-12	IPR003378	Fringe-like
A0A024GLT4	470	SUPERFAMILY	SSF46565	Chaperone J-domain	357	466	3.53e-31	IPR036869	Chaperone J-domain superfamily
A0A024GLT4	470	Pfam	PF00226	DnaJ domain	363	430	1.9e-25	IPR001623	DnaJ domain
A0A024GLT4	470	Gene3D	G3DSA:1.25.40.10	Tetratricopeptide repeat domain	4	360	4e-75	IPR011990	Tetratricopeptide-like helical domain superfamily
A0A024GLT4	470	Gene3D	G3DSA:1.10.287.110	DnaJ domain	361	469	1.9e-29	IPR036869	Chaperone J-domain superfamily
A0A024GLT4	470	Pfam	PF13181	Tetratricopeptide repeat	311	340	0.17	IPR019734	Tetratricopeptide repeat
A0A024GLT4	470	SUPERFAMILY	SSF48452	TPR-like	19	392	9.23e-24	IPR011990	Tetratricopeptide-like helical domain superfamily
A0A024G094	716	Pfam	PF03639	Glycosyl hydrolase family 81 N-terminal domain	37	329	4.3e-43	IPR040451	Glycosyl hydrolase family 81, N-terminal
A0A024G094	716	Gene3D	G3DSA:2.70.98.30	-	33	257	7.2e-41	-	-
A0A024G094	716	Gene3D	G3DSA:1.10.287.1170	-	358	425	6.7e-08	-	-
A0A024G094	716	Gene3D	G3DSA:1.20.5.420	Immunoglobulin FC, subunit C	671	715	2.4e-17	-	-
A0A024G094	716	Pfam	PF17652	Glycosyl hydrolase family 81 C-terminal domain	364	708	6.8e-115	IPR040720	Glycosyl hydrolase family 81, C-terminal domain
A0A024GGR6	499	Gene3D	G3DSA:3.40.50.1820	alpha/beta hydrolase	222	485	1.5e-06	IPR029058	Alpha/Beta hydrolase fold
A0A024GGR6	499	SUPERFAMILY	SSF53474	alpha/beta-Hydrolases	224	449	2.92e-05	IPR029058	Alpha/Beta hydrolase fold
A0A024GMV0	247	Pfam	PF01105	emp24/gp25L/p24 family/GOLD	94	240	4.6e-19	IPR009038	GOLD domain
A0A024G4W5	318	Gene3D	G3DSA:2.40.70.10	Acid Proteases	169	307	5e-06	IPR021109	Aspartic peptidase domain superfamily
A0A024FT59	701	Pfam	PF01344	Kelch motif	207	232	3.5e-05	IPR006652	Kelch repeat type 1
A0A024FT59	701	SUPERFAMILY	SSF50965	Galactose oxidase, central domain	138	323	1.23e-09	IPR011043	Galactose oxidase/kelch, beta-propeller
A0A024FT59	701	Pfam	PF01079	Hint module	476	624	3.1e-25	IPR001767	Hedgehog protein, Hint domain
A0A024FT59	701	Gene3D	G3DSA:2.170.16.10	Hedgehog/Intein (Hint) domain	482	624	1.1e-27	-	-
A0A024FT59	701	SUPERFAMILY	SSF51294	Hedgehog/intein (Hint) domain	482	623	2.94e-21	IPR036844	Hint domain superfamily
A0A024FT59	701	SUPERFAMILY	SSF117281	Kelch motif	17	193	2.22e-17	IPR015915	Kelch-type beta propeller
A0A024FT59	701	Gene3D	G3DSA:2.120.10.80	-	123	346	9.7e-17	IPR015915	Kelch-type beta propeller
A0A024FT59	701	Gene3D	G3DSA:2.120.10.80	-	9	119	2.7e-08	IPR015915	Kelch-type beta propeller
A0A024G2K6	241	Pfam	PF18271	Glycoside hydrolase 131 catalytic N-terminal domain	10	235	1.9e-20	IPR041524	Glycoside hydrolase 131, catalytic N-terminal
A0A024G2K6	241	Gene3D	G3DSA:2.60.120.1160	-	7	241	1.9e-34	-	-
A0A024GRX5	365	Gene3D	G3DSA:3.90.245.10	-	1	302	4.6e-06	IPR036452	Ribonucleoside hydrolase-like
A0A024GRX5	365	SUPERFAMILY	SSF53590	Nucleoside hydrolase	4	272	1.31e-05	IPR036452	Ribonucleoside hydrolase-like
A0A024FT84	674	Gene3D	G3DSA:3.20.20.70	Aldolase class I	593	671	4.3e-13	IPR013785	Aldolase-type TIM barrel
A0A024FT84	674	Gene3D	G3DSA:3.20.20.70	Aldolase class I	475	592	7.6e-29	IPR013785	Aldolase-type TIM barrel
A0A024FT84	674	Pfam	PF00215	Orotidine 5'-phosphate decarboxylase / HUMPS family	498	582	3.3e-08	IPR001754	Orotidine 5'-phosphate decarboxylase domain
A0A024FT84	674	SUPERFAMILY	SSF51366	Ribulose-phoshate binding barrel	476	661	9.42e-34	IPR011060	Ribulose-phosphate binding barrel
A0A024GKQ3	407	Gene3D	G3DSA:3.40.50.1000	-	218	407	2.3e-17	IPR023214	HAD superfamily
A0A024GN42	466	Gene3D	G3DSA:3.20.20.190	Phosphatidylinositol (PI) phosphodiesterase	58	289	5.6e-17	IPR017946	PLC-like phosphodiesterase, TIM beta/alpha-barrel domain superfamily
A0A024GN42	466	SUPERFAMILY	SSF51695	PLC-like phosphodiesterases	66	251	7.32e-20	IPR017946	PLC-like phosphodiesterase, TIM beta/alpha-barrel domain superfamily
A0A024FVF1	345	SUPERFAMILY	SSF50630	Acid proteases	249	327	8.19e-05	IPR021109	Aspartic peptidase domain superfamily
A0A024FVF1	345	Gene3D	G3DSA:2.40.70.10	Acid Proteases	204	341	5.9e-06	IPR021109	Aspartic peptidase domain superfamily
A0A024GBL4	447	Pfam	PF11051	Mannosyltransferase putative	55	339	1.1e-18	IPR022751	Alpha-mannosyltransferase
A0A024GBL4	447	SUPERFAMILY	SSF53448	Nucleotide-diphospho-sugar transferases	61	312	1.24e-05	IPR029044	Nucleotide-diphospho-sugar transferases
A0A024GUF5	388	SUPERFAMILY	SSF51445	(Trans)glycosidases	32	379	9.31e-65	IPR017853	Glycoside hydrolase superfamily
A0A024GUF5	388	Gene3D	G3DSA:3.20.20.80	Glycosidases	24	385	1.3e-76	-	-
A0A024GUF5	388	Pfam	PF00150	Cellulase (glycosyl hydrolase family 5)	94	362	1.9e-18	IPR001547	Glycoside hydrolase, family 5
A0A024GI90	697	Pfam	PF04910	Transcriptional repressor TCF25	318	639	5.1e-67	IPR006994	TCF25/Rqc1
A0A024GH58	150	SUPERFAMILY	SSF52058	L domain-like	1	102	1.19e-11	-	-
A0A024GH58	150	Gene3D	G3DSA:3.80.10.10	Ribonuclease Inhibitor	1	129	2.6e-16	IPR032675	Leucine-rich repeat domain superfamily
A0A024G557	356	SUPERFAMILY	SSF51126	Pectin lyase-like	26	346	1.12e-70	IPR011050	Pectin lyase fold/virulence factor
A0A024G557	356	Pfam	PF00295	Glycosyl hydrolases family 28	26	347	7.1e-80	IPR000743	Glycoside hydrolase, family 28
A0A024G557	356	Gene3D	G3DSA:2.160.20.10	-	5	350	7.6e-85	IPR012334	Pectin lyase fold
A0A024GNL1	479	Pfam	PF10290	Cell wall protein YJL171C/Tos1, N-terminal	182	229	2.7e-09	IPR018807	Cell wall protein YJL171C/Tos1, N-terminal
A0A024GNL1	479	Gene3D	G3DSA:2.60.110.10	Thaumatin	2	115	4.5e-05	IPR037176	Osmotin/thaumatin-like superfamily
A0A024GNL1	479	Pfam	PF10287	Cell wall protein YJL171C/Tos1, C-terminal	235	475	3.2e-55	IPR018805	Cell wall protein YJL171C/Tos1, C-terminal
A0A024GNL1	479	Gene3D	G3DSA:2.60.110.10	Thaumatin	116	148	1.9e-05	IPR037176	Osmotin/thaumatin-like superfamily
A0A024GNL1	479	SUPERFAMILY	SSF49870	Osmotin, thaumatin-like protein	2	147	3.27e-12	IPR037176	Osmotin/thaumatin-like superfamily
A0A024G1T7	568	Gene3D	G3DSA:2.60.120.260	-	117	181	4.6e-06	-	-
A0A024G1T7	568	Gene3D	G3DSA:2.10.25.10	Laminin	86	116	4.6e-05	-	-
A0A024G1T7	568	Pfam	PF07974	EGF-like domain	89	114	3.5e-06	IPR013111	EGF-like domain, extracellular
A0A024GP97	478	Pfam	PF00149	Calcineurin-like phosphoesterase	125	351	1.1e-13	IPR004843	Calcineurin-like phosphoesterase domain, ApaH type
A0A024GP97	478	Gene3D	G3DSA:3.60.21.10	-	122	434	5.6e-45	IPR029052	Metallo-dependent phosphatase-like
A0A024GP97	478	SUPERFAMILY	SSF56300	Metallo-dependent phosphatases	125	416	5.12e-30	IPR029052	Metallo-dependent phosphatase-like
A0A024G6A7	542	Pfam	PF03265	Deoxyribonuclease II	54	487	2.5e-21	IPR004947	Deoxyribonuclease II
A0A024FTE8	350	Pfam	PF00295	Glycosyl hydrolases family 28	24	344	6.6e-80	IPR000743	Glycoside hydrolase, family 28
A0A024FTE8	350	Gene3D	G3DSA:2.160.20.10	-	4	343	7.3e-82	IPR012334	Pectin lyase fold
A0A024FTE8	350	SUPERFAMILY	SSF51126	Pectin lyase-like	21	342	3.27e-69	IPR011050	Pectin lyase fold/virulence factor
A0A024FV24	280	Gene3D	G3DSA:3.60.21.10	-	39	229	1.1e-13	IPR029052	Metallo-dependent phosphatase-like
A0A024FV24	280	SUPERFAMILY	SSF56300	Metallo-dependent phosphatases	46	202	3.48e-12	IPR029052	Metallo-dependent phosphatase-like
A0A024FTA9	308	SUPERFAMILY	SSF118310	AN1-like Zinc finger	20	71	1.99e-10	IPR035896	AN1-like Zinc finger
A0A024FTA9	308	Gene3D	G3DSA:3.30.160.60	Classic Zinc Finger	202	225	2.4e-05	-	-
A0A024FTA9	308	Gene3D	G3DSA:4.10.1110.10	-	103	182	9e-09	IPR035896	AN1-like Zinc finger
A0A024FTA9	308	Pfam	PF01428	AN1-like Zinc finger	32	70	4.5e-11	IPR000058	Zinc finger, AN1-type
A0A024FTA9	308	Pfam	PF01428	AN1-like Zinc finger	123	162	4.7e-08	IPR000058	Zinc finger, AN1-type
A0A024FTA9	308	SUPERFAMILY	SSF118310	AN1-like Zinc finger	115	167	1.44e-07	IPR035896	AN1-like Zinc finger
A0A024FTA9	308	Gene3D	G3DSA:4.10.1110.10	-	17	79	1.7e-14	IPR035896	AN1-like Zinc finger
A0A024GNW5	619	Pfam	PF00150	Cellulase (glycosyl hydrolase family 5)	135	397	5.3e-14	IPR001547	Glycoside hydrolase, family 5
A0A024GNW5	619	SUPERFAMILY	SSF51445	(Trans)glycosidases	65	525	6.04e-87	IPR017853	Glycoside hydrolase superfamily
A0A024GNW5	619	Gene3D	G3DSA:3.20.20.80	Glycosidases	65	532	8.5e-103	-	-
A0A024GNW5	619	Pfam	PF07983	X8 domain	544	609	9.2e-09	IPR012946	X8 domain
A0A024FV46	332	SUPERFAMILY	SSF50630	Acid proteases	192	311	2.03e-06	IPR021109	Aspartic peptidase domain superfamily
A0A024FV46	332	Gene3D	G3DSA:2.40.70.10	Acid Proteases	149	314	1.6e-08	IPR021109	Aspartic peptidase domain superfamily
A0A024FUD8	411	Pfam	PF00026	Eukaryotic aspartyl protease	306	398	5.3e-05	IPR033121	Peptidase family A1 domain
A0A024FUD8	411	Gene3D	G3DSA:2.40.70.10	Acid Proteases	292	408	6.1e-08	IPR021109	Aspartic peptidase domain superfamily
A0A024FUD8	411	SUPERFAMILY	SSF50630	Acid proteases	297	408	6.81e-06	IPR021109	Aspartic peptidase domain superfamily
A0A024GIA7	348	Gene3D	G3DSA:2.40.70.10	Acid Proteases	115	295	7e-09	IPR021109	Aspartic peptidase domain superfamily
A0A024GIA7	348	SUPERFAMILY	SSF50630	Acid proteases	114	282	8.44e-07	IPR021109	Aspartic peptidase domain superfamily
A0A024GNS9	71	Gene3D	G3DSA:3.40.50.1820	alpha/beta hydrolase	1	62	2e-05	IPR029058	Alpha/Beta hydrolase fold
A0A024GNS9	71	SUPERFAMILY	SSF53474	alpha/beta-Hydrolases	3	56	1.13e-05	IPR029058	Alpha/Beta hydrolase fold
A0A024GQM2	368	SUPERFAMILY	SSF100895	Kazal-type serine protease inhibitors	316	362	4.16e-09	IPR036058	Kazal domain superfamily
A0A024GQM2	368	Gene3D	G3DSA:3.30.60.30	-	314	366	1.4e-06	-	-
A0A024GQM2	368	Pfam	PF07648	Kazal-type serine protease inhibitor domain	315	343	0.00033	IPR002350	Kazal domain
A0A024GQM2	368	Pfam	PF07648	Kazal-type serine protease inhibitor domain	266	308	4.7e-06	IPR002350	Kazal domain
A0A024GQM2	368	Gene3D	G3DSA:3.30.60.30	-	266	313	1.6e-08	-	-
A0A024GQM2	368	SUPERFAMILY	SSF100895	Kazal-type serine protease inhibitors	256	308	2.22e-09	IPR036058	Kazal domain superfamily
A0A024GCJ0	371	Gene3D	G3DSA:3.60.40.10	-	7	369	4.6e-91	IPR036457	PPM-type phosphatase-like domain superfamily
A0A024GCJ0	371	Pfam	PF00481	Protein phosphatase 2C	64	332	2.1e-41	IPR001932	PPM-type phosphatase-like domain
A0A024GCJ0	371	SUPERFAMILY	SSF81606	PP2C-like	37	365	2.09e-54	IPR036457	PPM-type phosphatase-like domain superfamily
A0A024G3Y6	190	Pfam	PF12929	Stretch-activated Ca2+-permeable channel component	12	158	4.1e-14	IPR024338	Stretch-activated cation channel Mid1/Calcium influx-promoting protein Ehs1
A0A024GQU3	300	Pfam	PF18271	Glycoside hydrolase 131 catalytic N-terminal domain	5	228	8.3e-25	IPR041524	Glycoside hydrolase 131, catalytic N-terminal
A0A024GQU3	300	Gene3D	G3DSA:2.60.120.1160	-	3	248	1.2e-41	-	-
A0A024FWS0	443	Pfam	PF13015	Glucosidase II beta subunit-like protein	298	434	8.7e-30	IPR036607	Glucosidase 2 subunit beta-like
A0A024FWS0	443	Gene3D	G3DSA:2.70.130.10	-	331	428	4.1e-24	IPR009011	Mannose-6-phosphate receptor binding domain superfamily
A0A024FWS0	443	Pfam	PF12999	Glucosidase II beta subunit-like	23	150	1e-34	IPR028146	Glucosidase II beta subunit, N-terminal
A0A024FWS0	443	SUPERFAMILY	SSF50911	Mannose 6-phosphate receptor domain	344	428	6.41e-14	IPR009011	Mannose-6-phosphate receptor binding domain superfamily
A0A024GMM0	406	SUPERFAMILY	SSF56784	HAD-like	117	352	1.08e-05	IPR036412	HAD-like superfamily
A0A024GMM0	406	Gene3D	G3DSA:3.40.50.1000	-	25	330	3.5e-13	IPR023214	HAD superfamily
A0A024GMM0	406	Gene3D	G3DSA:1.20.1440.320	-	52	211	3.5e-13	-	-
A0A024GGI9	902	SUPERFAMILY	SSF53067	Actin-like ATPase domain	2	182	5.7e-37	IPR043129	ATPase, nucleotide binding domain
A0A024GGI9	902	SUPERFAMILY	SSF53067	Actin-like ATPase domain	192	396	1.37e-37	IPR043129	ATPase, nucleotide binding domain
A0A024GGI9	902	Gene3D	G3DSA:3.30.420.40	-	4	393	5.6e-109	-	-
A0A024GGI9	902	Gene3D	G3DSA:3.90.640.10	Actin; Chain A, domain 4	242	328	5.6e-109	-	-
A0A024GGI9	902	Gene3D	G3DSA:3.30.420.40	-	186	376	5.6e-109	-	-
A0A024GGI9	902	Pfam	PF00012	Hsp70 protein	638	730	1.6e-06	IPR013126	Heat shock protein 70 family
A0A024GGI9	902	Pfam	PF00012	Hsp70 protein	2	609	2.9e-98	IPR013126	Heat shock protein 70 family
A0A024GGI9	902	Gene3D	G3DSA:3.30.30.30	-	65	120	5.6e-109	-	-
A0A024GGI9	902	Gene3D	G3DSA:2.60.34.10	Substrate Binding Domain Of DNAk; Chain A, domain 1	401	553	4.7e-25	IPR029047	Heat shock protein 70kD, peptide-binding domain superfamily
A0A024GGI9	902	Gene3D	G3DSA:1.20.1270.10	-	632	741	1.1e-19	IPR029048	Heat shock protein 70kD, C-terminal domain superfamily
A0A024GGI9	902	SUPERFAMILY	SSF100934	Heat shock protein 70kD (HSP70), C-terminal subdomain	657	740	3.53e-10	IPR029048	Heat shock protein 70kD, C-terminal domain superfamily
A0A024G3P5	195	Gene3D	G3DSA:3.40.30.10	Glutaredoxin	14	184	8.2e-09	-	-
A0A024G590	347	Pfam	PF00295	Glycosyl hydrolases family 28	22	342	4e-81	IPR000743	Glycoside hydrolase, family 28
A0A024G590	347	SUPERFAMILY	SSF51126	Pectin lyase-like	21	342	5.78e-67	IPR011050	Pectin lyase fold/virulence factor
A0A024G590	347	Gene3D	G3DSA:2.160.20.10	-	2	343	7.4e-82	IPR012334	Pectin lyase fold
A0A024GIS7	651	SUPERFAMILY	SSF52518	Thiamin diphosphate-binding fold (THDP-binding)	71	239	3.71e-60	IPR029061	Thiamin diphosphate-binding fold
A0A024GIS7	651	Pfam	PF02775	Thiamine pyrophosphate enzyme, C-terminal TPP binding domain	469	613	3.8e-48	IPR011766	Thiamine pyrophosphate enzyme, TPP-binding
A0A024GIS7	651	Gene3D	G3DSA:3.40.50.970	-	435	615	1.9e-127	-	-
A0A024GIS7	651	SUPERFAMILY	SSF52518	Thiamin diphosphate-binding fold (THDP-binding)	444	638	5.71e-65	IPR029061	Thiamin diphosphate-binding fold
A0A024GIS7	651	Gene3D	G3DSA:3.40.50.1220	-	267	434	1.9e-127	-	-
A0A024GIS7	651	SUPERFAMILY	SSF52467	DHS-like NAD/FAD-binding domain	264	433	1.16e-57	IPR029035	DHS-like NAD/FAD-binding domain superfamily
A0A024GIS7	651	Gene3D	G3DSA:3.40.50.970	-	62	250	9.5e-66	-	-
A0A024GIS7	651	Pfam	PF02776	Thiamine pyrophosphate enzyme, N-terminal TPP binding domain	72	235	1.6e-54	IPR012001	Thiamine pyrophosphate enzyme, N-terminal TPP-binding domain
A0A024GIS7	651	Pfam	PF00205	Thiamine pyrophosphate enzyme, central domain	267	407	1.1e-40	IPR012000	Thiamine pyrophosphate enzyme, central domain
A0A024FU41	167	Gene3D	G3DSA:3.40.50.300	-	5	165	2.7e-41	IPR027417	P-loop containing nucleoside triphosphate hydrolase
A0A024FU41	167	SUPERFAMILY	SSF52540	P-loop containing nucleoside triphosphate hydrolases	6	159	3.91e-29	IPR027417	P-loop containing nucleoside triphosphate hydrolase
A0A024FU41	167	Pfam	PF00025	ADP-ribosylation factor family	24	155	1.1e-36	IPR006689	Small GTPase superfamily, ARF/SAR type
A0A024G275	740	SUPERFAMILY	SSF52279	Beta-D-glucan exohydrolase, C-terminal domain	380	605	5.75e-34	IPR036881	Glycoside hydrolase family 3 C-terminal domain superfamily
A0A024G275	740	SUPERFAMILY	SSF51445	(Trans)glycosidases	4	379	8.95e-73	IPR017853	Glycoside hydrolase superfamily
A0A024G275	740	Pfam	PF14310	Fibronectin type III-like domain	639	711	3.8e-08	IPR026891	Fibronectin type III-like domain
A0A024G275	740	Gene3D	G3DSA:2.60.40.10	Immunoglobulins	604	724	1.3e-18	IPR013783	Immunoglobulin-like fold
A0A024G275	740	Gene3D	G3DSA:3.20.20.300	-	1	364	1.3e-73	IPR036962	Glycoside hydrolase, family 3, N-terminal domain superfamily
A0A024G275	740	Pfam	PF00933	Glycosyl hydrolase family 3 N terminal domain	14	342	6.6e-54	IPR001764	Glycoside hydrolase, family 3, N-terminal
A0A024G275	740	Pfam	PF01915	Glycosyl hydrolase family 3 C-terminal domain	380	602	3.9e-31	IPR002772	Glycoside hydrolase family 3 C-terminal domain
A0A024G275	740	Gene3D	G3DSA:3.40.50.1700	-	366	603	3.1e-43	IPR036881	Glycoside hydrolase family 3 C-terminal domain superfamily
A0A024GEA9	364	Gene3D	G3DSA:2.40.70.10	Acid Proteases	211	345	3.9e-12	IPR021109	Aspartic peptidase domain superfamily
A0A024GEA9	364	SUPERFAMILY	SSF50630	Acid proteases	211	344	7.58e-10	IPR021109	Aspartic peptidase domain superfamily
A0A024GEA9	364	Pfam	PF00026	Eukaryotic aspartyl protease	220	337	6e-08	IPR033121	Peptidase family A1 domain
A0A024GTR5	470	Gene3D	G3DSA:3.40.50.1820	alpha/beta hydrolase	11	405	1.9e-96	IPR029058	Alpha/Beta hydrolase fold
A0A024GTR5	470	SUPERFAMILY	SSF53474	alpha/beta-Hydrolases	9	289	1.14e-28	IPR029058	Alpha/Beta hydrolase fold
A0A024FTQ3	275	SUPERFAMILY	SSF50630	Acid proteases	110	256	9.97e-11	IPR021109	Aspartic peptidase domain superfamily
A0A024FTQ3	275	Gene3D	G3DSA:2.40.70.10	Acid Proteases	103	258	1.6e-09	IPR021109	Aspartic peptidase domain superfamily
A0A024GKN8	210	Pfam	PF00964	Elicitin	63	153	2.2e-08	IPR002200	Elicitin
A0A024GKN8	210	SUPERFAMILY	SSF48647	Fungal elicitin	71	154	1.86e-05	IPR036470	Elicitin superfamily
A0A024GBC8	243	Gene3D	G3DSA:2.160.20.10	-	26	242	3.4e-77	IPR012334	Pectin lyase fold
A0A024GBC8	243	Pfam	PF03211	Pectate lyase	13	214	6.2e-78	IPR004898	Pectate lyase PlyH/PlyE-like
A0A024GBC8	243	SUPERFAMILY	SSF51126	Pectin lyase-like	27	212	7.85e-50	IPR011050	Pectin lyase fold/virulence factor
A0A024GN70	388	Gene3D	G3DSA:3.40.50.1000	-	201	371	3.5e-05	IPR023214	HAD superfamily
A0A024GN70	388	SUPERFAMILY	SSF56784	HAD-like	210	375	3.06e-06	IPR036412	HAD-like superfamily
A0A024GN70	388	Gene3D	G3DSA:1.20.1440.320	-	52	186	1.6e-07	-	-
A0A024GIE1	312	Pfam	PF00026	Eukaryotic aspartyl protease	210	296	0.00014	IPR033121	Peptidase family A1 domain
A0A024GIE1	312	SUPERFAMILY	SSF50630	Acid proteases	152	295	5.42e-10	IPR021109	Aspartic peptidase domain superfamily
A0A024GIE1	312	Gene3D	G3DSA:2.40.70.10	Acid Proteases	144	309	6.9e-11	IPR021109	Aspartic peptidase domain superfamily
A0A024FY42	203	Gene3D	G3DSA:3.40.50.1820	alpha/beta hydrolase	4	198	2.7e-53	IPR029058	Alpha/Beta hydrolase fold
A0A024FY42	203	Pfam	PF00450	Serine carboxypeptidase	9	188	1.3e-52	IPR001563	Peptidase S10, serine carboxypeptidase
A0A024FY42	203	SUPERFAMILY	SSF53474	alpha/beta-Hydrolases	10	190	3.95e-51	IPR029058	Alpha/Beta hydrolase fold
poly_jg9653.t1	287	MobiDBLite	mobidb-lite	consensus disorder prediction	267	281	-	-	-
poly_jg9200.t1	333	SUPERFAMILY	SSF57016	Plant lectins/antimicrobial peptides	15	49	1.12e-08	IPR036861	Endochitinase-like superfamily
poly_jg9200.t1	333	Gene3D	G3DSA:3.20.20.370	Glycoside hydrolase/deacetylase	96	313	9e-47	-	-
poly_jg9200.t1	333	Gene3D	G3DSA:3.30.60.10	-	14	67	7.2e-10	IPR036861	Endochitinase-like superfamily
poly_jg9200.t1	333	Pfam	PF01522	Polysaccharide deacetylase	105	237	7e-23	IPR002509	NodB homology domain
poly_jg9200.t1	333	SUPERFAMILY	SSF88713	Glycoside hydrolase/deacetylase	95	311	4.45e-48	IPR011330	Glycoside hydrolase/deacetylase, beta/alpha-barrel
poly_jg9200.t1	333	Pfam	PF00187	Chitin recognition protein	16	46	3.1e-07	IPR001002	Chitin-binding, type 1
poly_jg1088.t1	214	Gene3D	G3DSA:3.10.110.10	Ubiquitin Conjugating Enzyme	39	177	1.8e-07	IPR016135	Ubiquitin-conjugating enzyme/RWD-like
poly_jg1088.t1	214	SUPERFAMILY	SSF54495	UBC-like	32	153	1.83e-05	IPR016135	Ubiquitin-conjugating enzyme/RWD-like
poly_jg9577.t1	407	Pfam	PF00646	F-box domain	9	37	4.7e-06	IPR001810	F-box domain
poly_jg9577.t1	407	SUPERFAMILY	SSF81383	F-box domain	4	38	1.44e-06	IPR036047	F-box-like domain superfamily
poly_jg6699.t1	896	Pfam	PF13606	Ankyrin repeat	547	574	0.00076	IPR002110	Ankyrin repeat
poly_jg6699.t1	896	Pfam	PF00023	Ankyrin repeat	624	655	0.0015	IPR002110	Ankyrin repeat
poly_jg6699.t1	896	Gene3D	G3DSA:1.25.40.20	-	109	300	1.1e-19	IPR036770	Ankyrin repeat-containing domain superfamily
poly_jg6699.t1	896	Gene3D	G3DSA:1.25.40.20	-	342	522	3.6e-19	IPR036770	Ankyrin repeat-containing domain superfamily
poly_jg6699.t1	896	SUPERFAMILY	SSF48403	Ankyrin repeat	353	840	1.58e-33	IPR036770	Ankyrin repeat-containing domain superfamily
poly_jg6699.t1	896	Pfam	PF12796	Ankyrin repeats (3 copies)	730	823	2.6e-07	IPR002110	Ankyrin repeat
poly_jg6699.t1	896	Pfam	PF12796	Ankyrin repeats (3 copies)	347	411	1.9e-06	IPR002110	Ankyrin repeat
poly_jg6699.t1	896	Gene3D	G3DSA:1.25.40.20	-	686	875	1.4e-18	IPR036770	Ankyrin repeat-containing domain superfamily
poly_jg6699.t1	896	Gene3D	G3DSA:1.25.40.20	-	523	682	6.4e-20	IPR036770	Ankyrin repeat-containing domain superfamily
poly_jg6699.t1	896	SUPERFAMILY	SSF48403	Ankyrin repeat	121	503	4e-28	IPR036770	Ankyrin repeat-containing domain superfamily
poly_jg6044.t1	718	Gene3D	G3DSA:1.25.40.20	-	330	640	9.6e-11	IPR036770	Ankyrin repeat-containing domain superfamily
poly_jg6044.t1	718	SUPERFAMILY	SSF48403	Ankyrin repeat	333	705	4.39e-13	IPR036770	Ankyrin repeat-containing domain superfamily
poly_jg7783.t1	111	SUPERFAMILY	SSF50630	Acid proteases	6	102	1.63e-23	IPR021109	Aspartic peptidase domain superfamily
poly_jg7783.t1	111	Gene3D	G3DSA:2.40.70.10	Acid Proteases	3	109	1.2e-25	IPR021109	Aspartic peptidase domain superfamily
poly_jg7783.t1	111	Pfam	PF00026	Eukaryotic aspartyl protease	16	102	2.5e-19	IPR033121	Peptidase family A1 domain
poly_jg6226.t1	555	Gene3D	G3DSA:1.10.1370.40	-	218	550	1.9e-42	-	-
poly_jg6226.t1	555	SUPERFAMILY	SSF55486	Metalloproteases ("zincins"), catalytic domain	11	530	1.14e-47	-	-
poly_jg6226.t1	555	Pfam	PF01432	Peptidase family M3	213	534	5.4e-38	IPR001567	Peptidase M3A/M3B catalytic domain
poly_jg1578.t1	277	Gene3D	G3DSA:2.40.40.10	-	6	112	1.3e-12	IPR036908	RlpA-like domain superfamily
poly_jg1578.t1	277	Pfam	PF00967	Barwin family	47	92	0.00014	IPR001153	Barwin domain
poly_jg1578.t1	277	SUPERFAMILY	SSF50685	Barwin-like endoglucanases	14	107	2.02e-13	IPR036908	RlpA-like domain superfamily
poly_jg5931.t1	464	SUPERFAMILY	SSF51905	FAD/NAD(P)-binding domain	2	438	1.12e-25	IPR036188	FAD/NAD(P)-binding domain superfamily
poly_jg5931.t1	464	Pfam	PF07156	Prenylcysteine lyase	96	445	8.7e-71	IPR010795	Prenylcysteine lyase
poly_jg5931.t1	464	Pfam	PF13450	NAD(P)-binding Rossmann-like domain	5	58	3.2e-10	-	-
poly_jg5931.t1	464	Gene3D	G3DSA:3.50.50.60	-	1	321	1.1e-20	IPR036188	FAD/NAD(P)-binding domain superfamily
poly_jg3649.t1	718	Gene3D	G3DSA:3.30.40.10	Zinc/RING finger domain, C3HC4 (zinc finger)	617	686	4.1e-17	IPR013083	Zinc finger, RING/FYVE/PHD-type
poly_jg3649.t1	718	SUPERFAMILY	SSF57850	RING/U-box	622	678	4.95e-19	-	-
poly_jg3649.t1	718	Pfam	PF13639	Ring finger domain	631	673	1.4e-10	IPR001841	Zinc finger, RING-type
poly_jg3141.t1	763	Gene3D	G3DSA:3.90.70.10	Cysteine proteinases	297	596	4.3e-88	-	-
poly_jg3141.t1	763	SUPERFAMILY	SSF54001	Cysteine proteinases	301	587	1.1e-86	IPR038765	Papain-like cysteine peptidase superfamily
poly_jg3141.t1	763	Gene3D	G3DSA:3.40.50.1820	alpha/beta hydrolase	11	275	2e-53	IPR029058	Alpha/Beta hydrolase fold
poly_jg3141.t1	763	SUPERFAMILY	SSF53474	alpha/beta-Hydrolases	20	269	1.16e-40	IPR029058	Alpha/Beta hydrolase fold
poly_jg3141.t1	763	Pfam	PF01764	Lipase (class 3)	79	209	2.5e-28	IPR002921	Fungal lipase-like domain
poly_jg3141.t1	763	Pfam	PF00443	Ubiquitin carboxyl-terminal hydrolase	302	585	3.6e-50	IPR001394	Peptidase C19, ubiquitin carboxyl-terminal hydrolase
poly_jg3538.t1	352	Pfam	PF07749	Endoplasmic reticulum protein ERp29, C-terminal domain	245	332	8.4e-12	IPR011679	Endoplasmic reticulum resident protein 29, C-terminal
poly_jg3538.t1	352	SUPERFAMILY	SSF52833	Thioredoxin-like	3	108	9.01e-36	IPR036249	Thioredoxin-like superfamily
poly_jg3538.t1	352	Gene3D	G3DSA:1.20.1150.12	-	243	348	6.6e-14	IPR036356	Endoplasmic reticulum resident protein 29, C-terminal domain superfamily
poly_jg3538.t1	352	Gene3D	G3DSA:3.40.30.10	Glutaredoxin	114	234	3.1e-30	-	-
poly_jg3538.t1	352	Pfam	PF00085	Thioredoxin	119	223	4.5e-22	IPR013766	Thioredoxin domain
poly_jg3538.t1	352	Pfam	PF00085	Thioredoxin	3	103	4.3e-26	IPR013766	Thioredoxin domain
poly_jg3538.t1	352	SUPERFAMILY	SSF47933	ERP29 C domain-like	244	334	1.44e-10	IPR036356	Endoplasmic reticulum resident protein 29, C-terminal domain superfamily
poly_jg3538.t1	352	Gene3D	G3DSA:3.40.30.10	Glutaredoxin	1	113	4.5e-39	-	-
poly_jg3538.t1	352	SUPERFAMILY	SSF52833	Thioredoxin-like	117	228	6.18e-28	IPR036249	Thioredoxin-like superfamily
poly_jg6535.t1	916	SUPERFAMILY	SSF57850	RING/U-box	846	911	9.42e-08	-	-
poly_jg6535.t1	916	Gene3D	G3DSA:3.30.40.10	Zinc/RING finger domain, C3HC4 (zinc finger)	828	908	1.8e-09	IPR013083	Zinc finger, RING/FYVE/PHD-type
poly_jg6348.t1	369	Gene3D	G3DSA:3.20.20.70	Aldolase class I	7	369	1.6e-135	IPR013785	Aldolase-type TIM barrel
poly_jg6348.t1	369	SUPERFAMILY	SSF51395	FMN-linked oxidoreductases	18	367	5.64e-99	-	-
poly_jg6348.t1	369	Pfam	PF01180	Dihydroorotate dehydrogenase	60	351	9.4e-90	IPR005720	Dihydroorotate dehydrogenase domain
poly_jg982.t1	238	Gene3D	G3DSA:3.30.40.10	Zinc/RING finger domain, C3HC4 (zinc finger)	148	238	2.1e-07	IPR013083	Zinc finger, RING/FYVE/PHD-type
poly_jg982.t1	238	SUPERFAMILY	SSF57850	RING/U-box	161	222	9.71e-08	-	-
poly_jg3693.t1	208	Pfam	PF14295	PAN domain	19	52	0.00075	IPR003609	PAN/Apple domain
poly_jg3693.t1	208	Pfam	PF14295	PAN domain	129	147	0.012	IPR003609	PAN/Apple domain
poly_jg7771.t1	381	SUPERFAMILY	SSF50685	Barwin-like endoglucanases	15	106	1.26e-12	IPR036908	RlpA-like domain superfamily
poly_jg7771.t1	381	Gene3D	G3DSA:2.40.40.10	-	6	111	3.6e-11	IPR036908	RlpA-like domain superfamily
poly_jg1324.t1	325	SUPERFAMILY	SSF57016	Plant lectins/antimicrobial peptides	11	47	4.71e-06	IPR036861	Endochitinase-like superfamily
poly_jg1324.t1	325	SUPERFAMILY	SSF88713	Glycoside hydrolase/deacetylase	96	300	2.72e-48	IPR011330	Glycoside hydrolase/deacetylase, beta/alpha-barrel
poly_jg1324.t1	325	Gene3D	G3DSA:3.20.20.370	Glycoside hydrolase/deacetylase	71	302	2e-46	-	-
poly_jg1324.t1	325	Pfam	PF00187	Chitin recognition protein	13	49	1e-06	IPR001002	Chitin-binding, type 1
poly_jg1324.t1	325	Pfam	PF01522	Polysaccharide deacetylase	101	223	4.2e-24	IPR002509	NodB homology domain
poly_jg1324.t1	325	Gene3D	G3DSA:3.30.60.10	-	11	70	2.2e-07	IPR036861	Endochitinase-like superfamily
poly_jg996.t1	332	Pfam	PF02140	Galactose binding lectin domain	52	127	4e-08	IPR000922	D-galactoside/L-rhamnose binding SUEL lectin domain
poly_jg996.t1	332	Pfam	PF02140	Galactose binding lectin domain	251	329	5.3e-15	IPR000922	D-galactoside/L-rhamnose binding SUEL lectin domain
poly_jg996.t1	332	Pfam	PF02140	Galactose binding lectin domain	149	228	8.1e-17	IPR000922	D-galactoside/L-rhamnose binding SUEL lectin domain
poly_jg996.t1	332	Gene3D	G3DSA:2.60.120.740	-	240	332	2.3e-15	IPR043159	D-galactoside/L-rhamnose binding SUEL lectin domain superfamily
poly_jg996.t1	332	Gene3D	G3DSA:2.60.120.740	-	134	234	2.1e-17	IPR043159	D-galactoside/L-rhamnose binding SUEL lectin domain superfamily
poly_jg996.t1	332	Gene3D	G3DSA:2.60.120.740	-	40	133	4.6e-10	IPR043159	D-galactoside/L-rhamnose binding SUEL lectin domain superfamily
poly_jg4270.t1	570	Pfam	PF02301	HORMA domain	11	210	3.9e-46	IPR003511	HORMA domain
poly_jg4270.t1	570	SUPERFAMILY	SSF56019	The spindle assembly checkpoint protein mad2	5	218	8.63e-31	IPR036570	HORMA domain superfamily
poly_jg4270.t1	570	Gene3D	G3DSA:3.30.900.10	HORMA domain	2	242	2.4e-60	IPR036570	HORMA domain superfamily
poly_jg2537.t1	306	SUPERFAMILY	SSF46565	Chaperone J-domain	3	63	1.96e-21	IPR036869	Chaperone J-domain superfamily
poly_jg2537.t1	306	Pfam	PF00684	DnaJ central domain	105	162	2.5e-10	IPR001305	Heat shock protein DnaJ, cysteine-rich domain
poly_jg2537.t1	306	Gene3D	G3DSA:2.60.260.20	-	210	289	8.8e-24	-	-
poly_jg2537.t1	306	Pfam	PF01556	DnaJ C terminal domain	79	289	9e-32	IPR002939	Chaperone DnaJ, C-terminal
poly_jg2537.t1	306	SUPERFAMILY	SSF57938	DnaJ/Hsp40 cysteine-rich domain	92	164	2.62e-15	IPR036410	Heat shock protein DnaJ, cysteine-rich domain superfamily
poly_jg2537.t1	306	Gene3D	G3DSA:1.10.287.110	DnaJ domain	1	78	1.5e-22	IPR036869	Chaperone J-domain superfamily
poly_jg2537.t1	306	SUPERFAMILY	SSF49493	HSP40/DnaJ peptide-binding domain	212	298	4.97e-18	IPR008971	HSP40/DnaJ peptide-binding
poly_jg2537.t1	306	Pfam	PF00226	DnaJ domain	3	61	1.9e-21	IPR001623	DnaJ domain
poly_jg2537.t1	306	SUPERFAMILY	SSF49493	HSP40/DnaJ peptide-binding domain	72	220	3.53e-14	IPR008971	HSP40/DnaJ peptide-binding
poly_jg2537.t1	306	Gene3D	G3DSA:2.60.260.20	-	79	203	5.7e-32	-	-
poly_jg2537.t1	306	Gene3D	G3DSA:2.10.230.10	-	105	162	5.7e-32	-	-
poly_jg1616.t1	500	SUPERFAMILY	SSF56300	Metallo-dependent phosphatases	127	357	2.28e-11	IPR029052	Metallo-dependent phosphatase-like
poly_jg1616.t1	500	Pfam	PF09423	PhoD-like phosphatase	127	377	4.9e-12	IPR018946	PhoD-like phosphatase, metallophosphatase domain
poly_jg1616.t1	500	Gene3D	G3DSA:3.60.21.70	-	90	416	9.6e-37	IPR038607	PhoD-like superfamily
poly_jg5979.t1	514	SUPERFAMILY	SSF49503	Cupredoxins	354	462	2.99e-07	IPR008972	Cupredoxin
poly_jg5979.t1	514	Pfam	PF07732	Multicopper oxidase	56	168	3.9e-09	IPR011707	Multicopper oxidase, N-terminal
poly_jg5979.t1	514	Gene3D	G3DSA:2.60.40.420	-	180	320	5.4e-16	IPR008972	Cupredoxin
poly_jg5979.t1	514	Pfam	PF00394	Multicopper oxidase	219	305	6e-05	IPR001117	Multicopper oxidase, second cupredoxin domain
poly_jg5979.t1	514	SUPERFAMILY	SSF49503	Cupredoxins	215	466	6.59e-13	IPR008972	Cupredoxin
poly_jg5979.t1	514	Gene3D	G3DSA:2.60.40.420	-	20	165	2.2e-23	IPR008972	Cupredoxin
poly_jg5979.t1	514	Gene3D	G3DSA:2.60.40.420	-	354	473	1.8e-13	IPR008972	Cupredoxin
poly_jg5979.t1	514	Pfam	PF07731	Multicopper oxidase	360	461	1.9e-08	IPR011706	Multicopper oxidase, C-terminal
poly_jg5979.t1	514	SUPERFAMILY	SSF49503	Cupredoxins	19	169	1.13e-17	IPR008972	Cupredoxin
poly_jg3187.t1	763	Gene3D	G3DSA:3.40.50.300	-	32	222	1.1e-12	IPR027417	P-loop containing nucleoside triphosphate hydrolase
poly_jg3187.t1	763	SUPERFAMILY	SSF52540	P-loop containing nucleoside triphosphate hydrolases	33	208	6.74e-13	IPR027417	P-loop containing nucleoside triphosphate hydrolase
poly_jg7536.t1	591	Gene3D	G3DSA:3.30.40.10	Zinc/RING finger domain, C3HC4 (zinc finger)	500	577	1.8e-13	IPR013083	Zinc finger, RING/FYVE/PHD-type
poly_jg7536.t1	591	SUPERFAMILY	SSF57850	RING/U-box	506	559	1.81e-14	-	-
poly_jg7536.t1	591	Pfam	PF13923	Zinc finger, C3HC4 type (RING finger)	512	552	1.9e-09	-	-
poly_jg10159.t1	554	Gene3D	G3DSA:1.25.40.20	-	386	504	7.3e-07	IPR036770	Ankyrin repeat-containing domain superfamily
poly_jg10159.t1	554	SUPERFAMILY	SSF48403	Ankyrin repeat	392	498	1.01e-06	IPR036770	Ankyrin repeat-containing domain superfamily
poly_jg6053.t1	645	Gene3D	G3DSA:1.10.8.870	-	433	575	2.4e-30	IPR038299	Alpha-glycerophosphate oxidase, C-terminal domain superfamily
poly_jg6053.t1	645	SUPERFAMILY	SSF54373	FAD-linked reductases, C-terminal domain	268	359	8.24e-05	-	-
poly_jg6053.t1	645	Pfam	PF16901	C-terminal domain of alpha-glycerophosphate oxidase	422	544	7.1e-34	IPR031656	Alpha-glycerophosphate oxidase, C-terminal
poly_jg6053.t1	645	Gene3D	G3DSA:3.50.50.60	-	24	400	3.8e-118	IPR036188	FAD/NAD(P)-binding domain superfamily
poly_jg6053.t1	645	Pfam	PF01266	FAD dependent oxidoreductase	27	381	2.4e-46	IPR006076	FAD dependent oxidoreductase
poly_jg6053.t1	645	SUPERFAMILY	SSF51905	FAD/NAD(P)-binding domain	9	261	4.29e-38	IPR036188	FAD/NAD(P)-binding domain superfamily
poly_jg6053.t1	645	Gene3D	G3DSA:3.30.9.10	-	115	360	3.8e-118	-	-
poly_jg983.t1	323	Gene3D	G3DSA:3.60.10.10	Endonuclease/exonuclease/phosphatase	4	282	1.4e-39	IPR036691	Endonuclease/exonuclease/phosphatase superfamily
poly_jg983.t1	323	SUPERFAMILY	SSF56219	DNase I-like	6	280	4.06e-32	IPR036691	Endonuclease/exonuclease/phosphatase superfamily
poly_jg983.t1	323	Pfam	PF03372	Endonuclease/Exonuclease/phosphatase family	34	273	1.8e-07	IPR005135	Endonuclease/exonuclease/phosphatase
poly_jg6866.t1	251	SUPERFAMILY	SSF57850	RING/U-box	161	219	2.37e-06	-	-
poly_jg6866.t1	251	Gene3D	G3DSA:3.30.40.10	Zinc/RING finger domain, C3HC4 (zinc finger)	145	244	3.1e-07	IPR013083	Zinc finger, RING/FYVE/PHD-type
poly_jg1585.t1	164	Gene3D	G3DSA:2.90.10.10	-	2	139	2.3e-06	IPR036426	Bulb-type lectin domain superfamily
poly_jg7663.t1	935	Gene3D	G3DSA:3.30.30.30	-	75	129	5.9e-173	-	-
poly_jg7663.t1	935	Gene3D	G3DSA:3.30.420.40	-	12	384	5.9e-173	-	-
poly_jg7663.t1	935	Pfam	PF00012	Hsp70 protein	11	618	4.9e-242	IPR013126	Heat shock protein 70 family
poly_jg7663.t1	935	SUPERFAMILY	SSF100934	Heat shock protein 70kD (HSP70), C-terminal subdomain	542	623	4.58e-20	IPR029048	Heat shock protein 70kD, C-terminal domain superfamily
poly_jg7663.t1	935	Gene3D	G3DSA:1.20.1270.10	-	545	619	1.5e-23	IPR029048	Heat shock protein 70kD, C-terminal domain superfamily
poly_jg7663.t1	935	Gene3D	G3DSA:2.60.34.10	Substrate Binding Domain Of DNAk; Chain A, domain 1	391	544	5.1e-65	IPR029047	Heat shock protein 70kD, peptide-binding domain superfamily
poly_jg7663.t1	935	Gene3D	G3DSA:3.30.420.40	-	195	367	5.9e-173	-	-
poly_jg7663.t1	935	SUPERFAMILY	SSF53067	Actin-like ATPase domain	10	194	3.7e-70	IPR043129	ATPase, nucleotide binding domain
poly_jg7663.t1	935	SUPERFAMILY	SSF53067	Actin-like ATPase domain	196	387	9.72e-64	IPR043129	ATPase, nucleotide binding domain
poly_jg7663.t1	935	Gene3D	G3DSA:3.90.640.10	Actin; Chain A, domain 4	237	319	5.9e-173	-	-
poly_jg7663.t1	935	SUPERFAMILY	SSF100920	Heat shock protein 70kD (HSP70), peptide-binding domain	392	548	2.88e-58	IPR029047	Heat shock protein 70kD, peptide-binding domain superfamily
poly_jg323.t1	616	SUPERFAMILY	SSF102712	JAB1/MPN domain	194	326	6.8e-17	-	-
poly_jg323.t1	616	Pfam	PF01398	JAB1/Mov34/MPN/PAD-1 ubiquitin protease	191	299	1.4e-14	IPR000555	JAB1/MPN/MOV34 metalloenzyme domain
poly_jg323.t1	616	Gene3D	G3DSA:3.40.140.10	Cytidine Deaminase, domain 2	392	566	7.5e-17	-	-
poly_jg323.t1	616	Gene3D	G3DSA:3.40.140.10	Cytidine Deaminase, domain 2	186	368	6.2e-52	-	-
poly_jg8447.t1	285	SUPERFAMILY	SSF53474	alpha/beta-Hydrolases	3	253	5.93e-52	IPR029058	Alpha/Beta hydrolase fold
poly_jg8447.t1	285	Gene3D	G3DSA:3.40.50.1820	alpha/beta hydrolase	1	270	5e-73	IPR029058	Alpha/Beta hydrolase fold
poly_jg8447.t1	285	Pfam	PF02089	Palmitoyl protein thioesterase	5	243	5.1e-59	-	-
poly_jg3642.t1	550	SUPERFAMILY	SSF48537	Phospholipase C/P1 nuclease	1	252	8.5e-53	IPR008947	Phospholipase C/P1 nuclease domain superfamily
poly_jg3642.t1	550	SUPERFAMILY	SSF48537	Phospholipase C/P1 nuclease	287	542	3.14e-49	IPR008947	Phospholipase C/P1 nuclease domain superfamily
poly_jg3642.t1	550	Gene3D	G3DSA:1.10.575.10	P1 Nuclease	287	549	1.7e-68	IPR008947	Phospholipase C/P1 nuclease domain superfamily
poly_jg3642.t1	550	Pfam	PF02265	S1/P1 Nuclease	287	543	1.2e-56	IPR003154	S1/P1 nuclease
poly_jg3642.t1	550	Pfam	PF02265	S1/P1 Nuclease	1	255	1.1e-59	IPR003154	S1/P1 nuclease
poly_jg3642.t1	550	Gene3D	G3DSA:1.10.575.10	P1 Nuclease	1	260	2.7e-71	IPR008947	Phospholipase C/P1 nuclease domain superfamily
poly_jg10179.t1	371	Gene3D	G3DSA:3.40.50.300	-	19	237	1.9e-17	IPR027417	P-loop containing nucleoside triphosphate hydrolase
poly_jg10179.t1	371	SUPERFAMILY	SSF52540	P-loop containing nucleoside triphosphate hydrolases	30	222	5.76e-15	IPR027417	P-loop containing nucleoside triphosphate hydrolase
poly_jg10179.t1	371	Pfam	PF01926	50S ribosome-binding GTPase	38	144	1.8e-07	IPR006073	GTP binding domain
poly_jg3326.t1	192	Pfam	PF00187	Chitin recognition protein	21	55	1.3e-06	IPR001002	Chitin-binding, type 1
poly_jg3326.t1	192	SUPERFAMILY	SSF57016	Plant lectins/antimicrobial peptides	30	50	1.96e-05	IPR036861	Endochitinase-like superfamily
poly_jg3326.t1	192	Gene3D	G3DSA:3.30.60.10	-	18	61	7.1e-07	IPR036861	Endochitinase-like superfamily
poly_jg3854.t1	335	Gene3D	G3DSA:3.40.630.10	Zn peptidases	9	327	3e-62	-	-
poly_jg3854.t1	335	Pfam	PF04952	Succinylglutamate desuccinylase / Aspartoacylase family	53	324	1.8e-36	IPR007036	Succinylglutamate desuccinylase/aspartoacylase
poly_jg3854.t1	335	SUPERFAMILY	SSF53187	Zn-dependent exopeptidases	26	323	3.97e-45	-	-
poly_jg8135.t1	182	Gene3D	G3DSA:3.30.60.10	-	19	58	3.2e-06	IPR036861	Endochitinase-like superfamily
poly_jg8135.t1	182	SUPERFAMILY	SSF57016	Plant lectins/antimicrobial peptides	30	51	4.32e-05	IPR036861	Endochitinase-like superfamily
poly_jg8314.t1	381	SUPERFAMILY	SSF49899	Concanavalin A-like lectins/glucanases	1	205	5.86e-53	IPR013320	Concanavalin A-like lectin/glucanase domain superfamily
poly_jg8314.t1	381	Gene3D	G3DSA:2.10.250.10	Calreticulin/calnexin, P domain	188	288	1.9e-36	IPR009033	Calreticulin/calnexin, P domain superfamily
poly_jg8314.t1	381	Pfam	PF00262	Calreticulin family	6	240	4.5e-56	IPR001580	Calreticulin/calnexin
poly_jg8314.t1	381	Pfam	PF00262	Calreticulin family	242	315	2.1e-22	IPR001580	Calreticulin/calnexin
poly_jg8314.t1	381	Gene3D	G3DSA:2.60.120.200	-	1	358	4.1e-80	-	-
poly_jg8314.t1	381	SUPERFAMILY	SSF63887	P-domain of calnexin/calreticulin	184	298	6.41e-37	IPR009033	Calreticulin/calnexin, P domain superfamily
poly_jg5800.t1	490	Pfam	PF14295	PAN domain	31	51	0.071	IPR003609	PAN/Apple domain
poly_jg5800.t1	490	Pfam	PF14295	PAN domain	314	350	1.3	IPR003609	PAN/Apple domain
poly_jg5800.t1	490	Pfam	PF14295	PAN domain	124	145	0.22	IPR003609	PAN/Apple domain
poly_jg5800.t1	490	Pfam	PF00024	PAN domain	227	270	8.1e-06	IPR003609	PAN/Apple domain
poly_jg5800.t1	490	SUPERFAMILY	SSF57414	Hairpin loop containing domain-like	235	273	5.49e-07	-	-
poly_jg5800.t1	490	Gene3D	G3DSA:3.50.4.10	Hepatocyte Growth Factor	217	295	1.2e-05	-	-
poly_jg5906.t1	718	Gene3D	G3DSA:3.40.50.1700	-	345	585	1.4e-61	IPR036881	Glycoside hydrolase family 3 C-terminal domain superfamily
poly_jg5906.t1	718	Gene3D	G3DSA:3.20.20.300	-	26	338	1.6e-93	IPR036962	Glycoside hydrolase, family 3, N-terminal domain superfamily
poly_jg5906.t1	718	Pfam	PF01915	Glycosyl hydrolase family 3 C-terminal domain	360	585	1.6e-46	IPR002772	Glycoside hydrolase family 3 C-terminal domain
poly_jg5906.t1	718	SUPERFAMILY	SSF51445	(Trans)glycosidases	14	359	3.79e-93	IPR017853	Glycoside hydrolase superfamily
poly_jg5906.t1	718	Pfam	PF00933	Glycosyl hydrolase family 3 N terminal domain	40	317	2.7e-44	IPR001764	Glycoside hydrolase, family 3, N-terminal
poly_jg5906.t1	718	SUPERFAMILY	SSF52279	Beta-D-glucan exohydrolase, C-terminal domain	360	588	1.44e-45	IPR036881	Glycoside hydrolase family 3 C-terminal domain superfamily
poly_jg5906.t1	718	Gene3D	G3DSA:2.60.40.10	Immunoglobulins	586	706	4.9e-07	IPR013783	Immunoglobulin-like fold
poly_jg8605.t1	663	Pfam	PF00067	Cytochrome P450	495	586	7.6e-13	IPR001128	Cytochrome P450
poly_jg8605.t1	663	SUPERFAMILY	SSF48264	Cytochrome P450	214	632	1.27e-26	IPR036396	Cytochrome P450 superfamily
poly_jg8605.t1	663	Gene3D	G3DSA:1.10.630.10	Cytochrome P450	212	633	5.5e-28	IPR036396	Cytochrome P450 superfamily
poly_jg1697.t1	500	SUPERFAMILY	SSF49503	Cupredoxins	32	169	3.36e-17	IPR008972	Cupredoxin
poly_jg1697.t1	500	Pfam	PF00394	Multicopper oxidase	202	295	5.3e-05	IPR001117	Multicopper oxidase, second cupredoxin domain
poly_jg1697.t1	500	Pfam	PF07732	Multicopper oxidase	88	166	3.5e-10	IPR011707	Multicopper oxidase, N-terminal
poly_jg1697.t1	500	SUPERFAMILY	SSF49503	Cupredoxins	212	474	9.38e-13	IPR008972	Cupredoxin
poly_jg1697.t1	500	Gene3D	G3DSA:2.60.40.420	-	184	322	1.2e-14	IPR008972	Cupredoxin
poly_jg1697.t1	500	SUPERFAMILY	SSF49503	Cupredoxins	354	464	1.49e-10	IPR008972	Cupredoxin
poly_jg1697.t1	500	Pfam	PF07731	Multicopper oxidase	354	465	2.5e-11	IPR011706	Multicopper oxidase, C-terminal
poly_jg1697.t1	500	Gene3D	G3DSA:2.60.40.420	-	26	164	1.5e-25	IPR008972	Cupredoxin
poly_jg1697.t1	500	Gene3D	G3DSA:2.60.40.420	-	351	474	2.2e-18	IPR008972	Cupredoxin
poly_jg2837.t1	525	Pfam	PF01823	MAC/Perforin domain	100	300	6.2e-17	IPR020864	Membrane attack complex component/perforin (MACPF) domain
poly_jg803.t1	228	SUPERFAMILY	SSF50965	Galactose oxidase, central domain	26	206	1.31e-06	IPR011043	Galactose oxidase/kelch, beta-propeller
poly_jg803.t1	228	Gene3D	G3DSA:2.120.10.80	-	14	228	2.5e-13	IPR015915	Kelch-type beta propeller
poly_jg6310.t1	222	Gene3D	G3DSA:3.40.50.150	Vaccinia Virus protein VP39	1	221	4.8e-79	IPR029063	S-adenosyl-L-methionine-dependent methyltransferase superfamily
poly_jg6310.t1	222	SUPERFAMILY	SSF53335	S-adenosyl-L-methionine-dependent methyltransferases	3	210	5.42e-41	IPR029063	S-adenosyl-L-methionine-dependent methyltransferase superfamily
poly_jg6310.t1	222	Pfam	PF01135	Protein-L-isoaspartate(D-aspartate) O-methyltransferase (PCMT)	3	215	4.6e-78	-	-
poly_jg9742.t1	611	Gene3D	G3DSA:1.25.40.20	-	329	540	5.3e-06	IPR036770	Ankyrin repeat-containing domain superfamily
poly_jg9742.t1	611	SUPERFAMILY	SSF48403	Ankyrin repeat	326	534	1.62e-05	IPR036770	Ankyrin repeat-containing domain superfamily
poly_jg3522.t1	430	Gene3D	G3DSA:3.40.50.1820	alpha/beta hydrolase	25	429	8.7e-105	IPR029058	Alpha/Beta hydrolase fold
poly_jg3522.t1	430	Pfam	PF00450	Serine carboxypeptidase	38	424	7.3e-86	IPR001563	Peptidase S10, serine carboxypeptidase
poly_jg3522.t1	430	SUPERFAMILY	SSF53474	alpha/beta-Hydrolases	28	426	3.08e-104	IPR029058	Alpha/Beta hydrolase fold
poly_jg4085.t1	228	Pfam	PF13415	Galactose oxidase, central domain	75	123	6.9e-09	-	-
poly_jg4085.t1	228	Pfam	PF13415	Galactose oxidase, central domain	126	176	3.4e-10	-	-
poly_jg4085.t1	228	Gene3D	G3DSA:2.120.10.80	-	4	107	1.8e-23	IPR015915	Kelch-type beta propeller
poly_jg4085.t1	228	SUPERFAMILY	SSF117281	Kelch motif	11	208	7.59e-48	IPR015915	Kelch-type beta propeller
poly_jg4085.t1	228	Pfam	PF13854	Kelch motif	14	48	1.3e-07	-	-
poly_jg4085.t1	228	Gene3D	G3DSA:2.120.10.80	-	108	224	5.7e-24	IPR015915	Kelch-type beta propeller
poly_jg6144.t1	678	Pfam	PF13639	Ring finger domain	598	641	5.3e-11	IPR001841	Zinc finger, RING-type
poly_jg6144.t1	678	Gene3D	G3DSA:3.30.40.10	Zinc/RING finger domain, C3HC4 (zinc finger)	579	649	3.3e-16	IPR013083	Zinc finger, RING/FYVE/PHD-type
poly_jg6144.t1	678	SUPERFAMILY	SSF57850	RING/U-box	591	647	1.5e-17	-	-
poly_jg2440.t1	382	Gene3D	G3DSA:1.10.510.10	Transferase(Phosphotransferase) domain 1	16	145	3.2e-05	-	-
poly_jg2440.t1	382	SUPERFAMILY	SSF56112	Protein kinase-like (PK-like)	16	312	2.44e-32	IPR011009	Protein kinase-like domain superfamily
poly_jg2440.t1	382	Pfam	PF00069	Protein kinase domain	156	267	3.5e-17	IPR000719	Protein kinase domain
poly_jg2440.t1	382	Gene3D	G3DSA:1.10.510.10	Transferase(Phosphotransferase) domain 1	162	324	9.2e-23	-	-
poly_jg2755.t1	228	Pfam	PF00445	Ribonuclease T2 family	19	195	1.2e-43	IPR001568	Ribonuclease T2-like
poly_jg2755.t1	228	SUPERFAMILY	SSF55895	Ribonuclease Rh-like	8	205	3.66e-51	IPR036430	Ribonuclease T2-like superfamily
poly_jg2755.t1	228	Gene3D	G3DSA:3.90.730.10	-	13	218	1.9e-57	IPR036430	Ribonuclease T2-like superfamily
poly_jg6535.t2	905	SUPERFAMILY	SSF57850	RING/U-box	835	900	9.03e-08	-	-
poly_jg6535.t2	905	Gene3D	G3DSA:3.30.40.10	Zinc/RING finger domain, C3HC4 (zinc finger)	817	897	1.8e-09	IPR013083	Zinc finger, RING/FYVE/PHD-type
poly_jg3830.t1	228	SUPERFAMILY	SSF57414	Hairpin loop containing domain-like	2	67	1.18e-07	-	-
poly_jg3830.t1	228	Pfam	PF00024	PAN domain	7	59	4.5e-06	IPR003609	PAN/Apple domain
poly_jg3830.t1	228	Gene3D	G3DSA:3.50.4.10	Hepatocyte Growth Factor	1	89	3.2e-07	-	-
poly_jg4184.t1	324	SUPERFAMILY	SSF52540	P-loop containing nucleoside triphosphate hydrolases	6	147	3.86e-13	IPR027417	P-loop containing nucleoside triphosphate hydrolase
poly_jg4184.t1	324	Gene3D	G3DSA:3.40.50.300	-	3	179	1.3e-11	IPR027417	P-loop containing nucleoside triphosphate hydrolase
poly_jg1064.t1	487	Gene3D	G3DSA:3.40.30.10	Glutaredoxin	108	216	8.2e-06	-	-
poly_jg1064.t1	487	SUPERFAMILY	SSF52833	Thioredoxin-like	113	225	2.97e-05	IPR036249	Thioredoxin-like superfamily
poly_jg1064.t1	487	Gene3D	G3DSA:3.40.30.10	Glutaredoxin	334	469	1e-27	-	-
poly_jg1064.t1	487	SUPERFAMILY	SSF52833	Thioredoxin-like	332	452	9.25e-22	IPR036249	Thioredoxin-like superfamily
poly_jg1064.t1	487	Gene3D	G3DSA:3.40.30.10	Glutaredoxin	217	333	5.2e-31	-	-
poly_jg1064.t1	487	Pfam	PF13848	Thioredoxin-like domain	139	320	5.9e-22	-	-
poly_jg1064.t1	487	Pfam	PF00085	Thioredoxin	347	438	1.8e-12	IPR013766	Thioredoxin domain
poly_jg1064.t1	487	Pfam	PF00085	Thioredoxin	5	104	1.5e-14	IPR013766	Thioredoxin domain
poly_jg1064.t1	487	Gene3D	G3DSA:3.40.30.10	Glutaredoxin	1	107	1.5e-22	-	-
poly_jg1064.t1	487	SUPERFAMILY	SSF52833	Thioredoxin-like	213	341	1.26e-23	IPR036249	Thioredoxin-like superfamily
poly_jg1064.t1	487	SUPERFAMILY	SSF52833	Thioredoxin-like	2	105	6.28e-20	IPR036249	Thioredoxin-like superfamily
poly_jg7929.t1	505	SUPERFAMILY	SSF57016	Plant lectins/antimicrobial peptides	46	82	6.28e-07	IPR036861	Endochitinase-like superfamily
poly_jg7929.t1	505	Gene3D	G3DSA:3.30.20.10	Endochitinase, domain 2	366	421	1.7e-17	-	-
poly_jg7929.t1	505	Gene3D	G3DSA:3.30.60.10	-	204	243	2.1e-10	IPR036861	Endochitinase-like superfamily
poly_jg7929.t1	505	SUPERFAMILY	SSF57016	Plant lectins/antimicrobial peptides	206	237	2.75e-09	IPR036861	Endochitinase-like superfamily
poly_jg7929.t1	505	SUPERFAMILY	SSF57016	Plant lectins/antimicrobial peptides	115	148	1.01e-08	IPR036861	Endochitinase-like superfamily
poly_jg7929.t1	505	Pfam	PF00182	Chitinase class I	298	500	2.2e-33	IPR000726	Glycoside hydrolase, family 19, catalytic
poly_jg7929.t1	505	SUPERFAMILY	SSF57016	Plant lectins/antimicrobial peptides	256	291	4.71e-09	IPR036861	Endochitinase-like superfamily
poly_jg7929.t1	505	Gene3D	G3DSA:3.30.60.10	-	3	39	3.1e-08	IPR036861	Endochitinase-like superfamily
poly_jg7929.t1	505	Pfam	PF00187	Chitin recognition protein	117	148	1.8e-07	IPR001002	Chitin-binding, type 1
poly_jg7929.t1	505	Pfam	PF00187	Chitin recognition protein	206	235	5.6e-09	IPR001002	Chitin-binding, type 1
poly_jg7929.t1	505	Pfam	PF00187	Chitin recognition protein	258	287	1.6e-07	IPR001002	Chitin-binding, type 1
poly_jg7929.t1	505	Pfam	PF00187	Chitin recognition protein	6	36	6.6e-07	IPR001002	Chitin-binding, type 1
poly_jg7929.t1	505	SUPERFAMILY	SSF53955	Lysozyme-like	297	501	8.44e-53	IPR023346	Lysozyme-like domain superfamily
poly_jg7929.t1	505	Gene3D	G3DSA:1.10.530.10	-	287	505	5.7e-41	-	-
poly_jg7929.t1	505	Gene3D	G3DSA:3.30.60.10	-	256	286	1.7e-08	IPR036861	Endochitinase-like superfamily
poly_jg7929.t1	505	SUPERFAMILY	SSF57016	Plant lectins/antimicrobial peptides	4	39	1.31e-08	IPR036861	Endochitinase-like superfamily
poly_jg7929.t1	505	Gene3D	G3DSA:3.30.60.10	-	46	102	2.4e-07	IPR036861	Endochitinase-like superfamily
poly_jg7929.t1	505	Gene3D	G3DSA:3.30.60.10	-	115	152	4.3e-09	IPR036861	Endochitinase-like superfamily
poly_jg5289.t1	866	Gene3D	G3DSA:3.30.420.40	-	183	374	1.9e-100	-	-
poly_jg5289.t1	866	Gene3D	G3DSA:3.30.30.30	-	65	117	1.9e-100	-	-
poly_jg5289.t1	866	SUPERFAMILY	SSF53067	Actin-like ATPase domain	2	182	6.48e-37	IPR043129	ATPase, nucleotide binding domain
poly_jg5289.t1	866	SUPERFAMILY	SSF100934	Heat shock protein 70kD (HSP70), C-terminal subdomain	601	678	2.75e-10	IPR029048	Heat shock protein 70kD, C-terminal domain superfamily
poly_jg5289.t1	866	Pfam	PF00012	Hsp70 protein	2	673	2.1e-92	IPR013126	Heat shock protein 70 family
poly_jg5289.t1	866	Gene3D	G3DSA:2.60.34.10	Substrate Binding Domain Of DNAk; Chain A, domain 1	399	545	3.1e-15	IPR029047	Heat shock protein 70kD, peptide-binding domain superfamily
poly_jg5289.t1	866	Gene3D	G3DSA:3.30.420.40	-	3	391	1.9e-100	-	-
poly_jg5289.t1	866	Gene3D	G3DSA:3.90.640.10	Actin; Chain A, domain 4	238	326	1.9e-100	-	-
poly_jg5289.t1	866	SUPERFAMILY	SSF53067	Actin-like ATPase domain	190	393	1.58e-38	IPR043129	ATPase, nucleotide binding domain
poly_jg5289.t1	866	Gene3D	G3DSA:1.20.1270.10	-	573	684	1.4e-18	IPR029048	Heat shock protein 70kD, C-terminal domain superfamily
poly_jg1526.t1	717	Pfam	PF12678	RING-H2 zinc finger domain	645	698	8.9e-10	IPR024766	Zinc finger, RING-H2-type
poly_jg1526.t1	717	Gene3D	G3DSA:3.30.40.10	Zinc/RING finger domain, C3HC4 (zinc finger)	644	714	3.3e-12	IPR013083	Zinc finger, RING/FYVE/PHD-type
poly_jg1526.t1	717	SUPERFAMILY	SSF57850	RING/U-box	646	704	2.91e-15	-	-
poly_jg7971.t1	845	SUPERFAMILY	SSF56112	Protein kinase-like (PK-like)	470	627	1.2e-19	IPR011009	Protein kinase-like domain superfamily
poly_jg7971.t1	845	Gene3D	G3DSA:1.10.510.10	Transferase(Phosphotransferase) domain 1	462	632	3.8e-18	-	-
poly_jg7971.t1	845	Pfam	PF00069	Protein kinase domain	479	655	3.6e-12	IPR000719	Protein kinase domain
poly_jg52.t1	425	Gene3D	G3DSA:1.25.40.20	-	305	397	2e-06	IPR036770	Ankyrin repeat-containing domain superfamily
poly_jg52.t1	425	SUPERFAMILY	SSF48403	Ankyrin repeat	310	385	5.47e-06	IPR036770	Ankyrin repeat-containing domain superfamily
poly_jg2656.t1	207	SUPERFAMILY	SSF57016	Plant lectins/antimicrobial peptides	30	51	5.89e-05	IPR036861	Endochitinase-like superfamily
poly_jg2656.t1	207	Gene3D	G3DSA:3.30.60.10	-	16	58	6.5e-07	IPR036861	Endochitinase-like superfamily
poly_jg9823.t1	611	Gene3D	G3DSA:3.30.40.10	Zinc/RING finger domain, C3HC4 (zinc finger)	537	611	2.5e-11	IPR013083	Zinc finger, RING/FYVE/PHD-type
poly_jg9823.t1	611	SUPERFAMILY	SSF57850	RING/U-box	544	611	1.22e-11	-	-
poly_jg2825.t1	442	Gene3D	G3DSA:3.10.100.10	-	1	127	2.3e-10	IPR016186	C-type lectin-like/link domain superfamily
poly_jg2825.t1	442	SUPERFAMILY	SSF56436	C-type lectin-like	6	124	1.66e-10	IPR016187	C-type lectin fold
poly_jg2825.t1	442	Gene3D	G3DSA:3.10.100.10	-	314	442	7.8e-06	IPR016186	C-type lectin-like/link domain superfamily
poly_jg651.t1	358	SUPERFAMILY	SSF81606	PP2C-like	56	269	4.05e-19	IPR036457	PPM-type phosphatase-like domain superfamily
poly_jg651.t1	358	Gene3D	G3DSA:3.60.40.10	-	44	271	4.3e-20	IPR036457	PPM-type phosphatase-like domain superfamily
poly_jg7727.t1	634	SUPERFAMILY	SSF51695	PLC-like phosphodiesterases	313	626	4.29e-43	IPR017946	PLC-like phosphodiesterase, TIM beta/alpha-barrel domain superfamily
poly_jg7727.t1	634	Gene3D	G3DSA:3.20.20.190	Phosphatidylinositol (PI) phosphodiesterase	313	626	1.6e-38	IPR017946	PLC-like phosphodiesterase, TIM beta/alpha-barrel domain superfamily
poly_jg4500.t1	240	Gene3D	G3DSA:3.20.20.370	Glycoside hydrolase/deacetylase	2	217	3.4e-37	-	-
poly_jg4500.t1	240	Pfam	PF01522	Polysaccharide deacetylase	4	136	1.5e-18	IPR002509	NodB homology domain
poly_jg4500.t1	240	SUPERFAMILY	SSF88713	Glycoside hydrolase/deacetylase	3	215	7.23e-34	IPR011330	Glycoside hydrolase/deacetylase, beta/alpha-barrel
poly_jg4788.t1	308	SUPERFAMILY	SSF49899	Concanavalin A-like lectins/glucanases	85	253	3.29e-33	IPR013320	Concanavalin A-like lectin/glucanase domain superfamily
poly_jg4788.t1	308	Gene3D	G3DSA:2.60.120.200	-	30	252	8.5e-38	-	-
poly_jg4788.t1	308	Pfam	PF00722	Glycosyl hydrolases family 16	86	239	1.3e-33	IPR000757	Glycoside hydrolase family 16
poly_jg8535.t1	575	Gene3D	G3DSA:2.40.128.80	Cathepsin C, exclusion domain	1	148	4.1e-28	IPR036496	Cathepsin C, exclusion domain superfamily
poly_jg8535.t1	575	Pfam	PF08773	Cathepsin C exclusion domain	1	147	2.2e-25	IPR014882	Cathepsin C exclusion
poly_jg8535.t1	575	SUPERFAMILY	SSF75001	Dipeptidyl peptidase I (cathepsin C), exclusion domain	1	148	3.14e-24	IPR036496	Cathepsin C, exclusion domain superfamily
poly_jg8535.t1	575	SUPERFAMILY	SSF54001	Cysteine proteinases	180	459	1.56e-72	IPR038765	Papain-like cysteine peptidase superfamily
poly_jg8535.t1	575	Pfam	PF00112	Papain family cysteine protease	243	459	4.9e-53	IPR000668	Peptidase C1A, papain C-terminal
poly_jg8535.t1	575	Gene3D	G3DSA:3.90.70.10	Cysteine proteinases	169	465	1.8e-76	-	-
poly_jg1631.t1	350	Pfam	PF00188	Cysteine-rich secretory protein family	11	134	2.4e-18	IPR014044	CAP domain
poly_jg1631.t1	350	SUPERFAMILY	SSF55797	PR-1-like	3	150	3.53e-47	IPR035940	CAP superfamily
poly_jg1631.t1	350	Gene3D	G3DSA:3.40.33.10	CAP	2	172	7e-48	IPR035940	CAP superfamily
poly_jg2906.t1	396	Pfam	PF00041	Fibronectin type III domain	226	316	4.4e-06	IPR003961	Fibronectin type III
poly_jg2906.t1	396	Gene3D	G3DSA:2.60.40.10	Immunoglobulins	223	342	7.2e-12	IPR013783	Immunoglobulin-like fold
poly_jg2906.t1	396	SUPERFAMILY	SSF49265	Fibronectin type III	223	321	1.06e-11	IPR036116	Fibronectin type III superfamily
poly_jg397.t1	384	Pfam	PF01118	Semialdehyde dehydrogenase, NAD binding domain	110	167	8.7e-10	IPR000534	Semialdehyde dehydrogenase, NAD-binding
poly_jg397.t1	384	SUPERFAMILY	SSF51735	NAD(P)-binding Rossmann-fold domains	73	204	1.47e-32	IPR036291	NAD(P)-binding domain superfamily
poly_jg397.t1	384	Gene3D	G3DSA:3.40.50.720	-	111	377	2.5e-53	-	-
poly_jg397.t1	384	Gene3D	G3DSA:3.30.360.10	Dihydrodipicolinate Reductase; domain 2	189	364	2.5e-53	-	-
poly_jg397.t1	384	SUPERFAMILY	SSF55347	Glyceraldehyde-3-phosphate dehydrogenase-like, C-terminal domain	185	359	3.11e-32	-	-
poly_jg3385.t1	888	Gene3D	G3DSA:2.60.40.1180	-	676	748	3.3e-15	IPR013780	Glycosyl hydrolase, all-beta
poly_jg3385.t1	888	Gene3D	G3DSA:2.60.40.1760	glycosyl hydrolase (family 31)	25	318	5.6e-30	-	-
poly_jg3385.t1	888	Gene3D	G3DSA:2.60.40.1180	-	749	886	4.8e-22	IPR013780	Glycosyl hydrolase, all-beta
poly_jg3385.t1	888	Pfam	PF13802	Galactose mutarotase-like	203	277	1.5e-16	IPR025887	Glycoside hydrolase family 31, N-terminal domain
poly_jg3385.t1	888	Gene3D	G3DSA:3.20.20.80	Glycosidases	496	675	2.4e-66	-	-
poly_jg3385.t1	888	Gene3D	G3DSA:3.20.20.80	Glycosidases	320	495	4.8e-55	-	-
poly_jg3385.t1	888	Pfam	PF01055	Glycosyl hydrolases family 31	299	752	1.2e-138	IPR000322	Glycoside hydrolase family 31
poly_jg3385.t1	888	SUPERFAMILY	SSF51445	(Trans)glycosidases	309	664	1.1e-74	IPR017853	Glycoside hydrolase superfamily
poly_jg3385.t1	888	SUPERFAMILY	SSF51011	Glycosyl hydrolase domain	666	748	2.37e-16	-	-
poly_jg3385.t1	888	SUPERFAMILY	SSF74650	Galactose mutarotase-like	49	306	2.39e-10	IPR011013	Galactose mutarotase-like domain superfamily
poly_jg2231.t1	611	SUPERFAMILY	SSF48403	Ankyrin repeat	349	600	3.52e-09	IPR036770	Ankyrin repeat-containing domain superfamily
poly_jg2231.t1	611	Gene3D	G3DSA:1.25.40.20	-	351	603	7.4e-11	IPR036770	Ankyrin repeat-containing domain superfamily
poly_jg2255.t1	391	Pfam	PF00026	Eukaryotic aspartyl protease	47	357	2.7e-105	IPR033121	Peptidase family A1 domain
poly_jg2255.t1	391	Gene3D	G3DSA:2.40.70.10	Acid Proteases	37	356	3.9e-114	IPR021109	Aspartic peptidase domain superfamily
poly_jg2255.t1	391	SUPERFAMILY	SSF50630	Acid proteases	22	358	1.65e-106	IPR021109	Aspartic peptidase domain superfamily
poly_jg2255.t1	391	Gene3D	G3DSA:2.40.70.10	Acid Proteases	47	203	3.9e-114	IPR021109	Aspartic peptidase domain superfamily
poly_jg5380.t1	629	SUPERFAMILY	SSF57850	RING/U-box	567	626	1.82e-05	-	-
poly_jg8119.t1	236	SUPERFAMILY	SSF52540	P-loop containing nucleoside triphosphate hydrolases	44	212	1.44e-16	IPR027417	P-loop containing nucleoside triphosphate hydrolase
poly_jg8119.t1	236	Pfam	PF01926	50S ribosome-binding GTPase	48	193	9.7e-07	IPR006073	GTP binding domain
poly_jg8119.t1	236	Gene3D	G3DSA:3.40.50.300	-	30	232	5.4e-15	IPR027417	P-loop containing nucleoside triphosphate hydrolase
poly_jg1996.t1	282	Gene3D	G3DSA:2.40.70.10	Acid Proteases	5	133	1e-14	IPR021109	Aspartic peptidase domain superfamily
poly_jg1996.t1	282	Gene3D	G3DSA:2.40.70.10	Acid Proteases	134	277	1.1e-12	IPR021109	Aspartic peptidase domain superfamily
poly_jg1996.t1	282	SUPERFAMILY	SSF50630	Acid proteases	14	266	4.85e-28	IPR021109	Aspartic peptidase domain superfamily
poly_jg9423.t1	318	Gene3D	G3DSA:3.30.60.10	-	1	42	1.6e-05	IPR036861	Endochitinase-like superfamily
poly_jg3910.t1	593	Gene3D	G3DSA:2.60.120.200	-	413	586	3.7e-08	-	-
poly_jg3910.t1	593	Gene3D	G3DSA:1.10.287.1490	-	45	248	1.7e-06	-	-
poly_jg3910.t1	593	SUPERFAMILY	SSF49899	Concanavalin A-like lectins/glucanases	426	589	7.72e-08	IPR013320	Concanavalin A-like lectin/glucanase domain superfamily
poly_jg8374.t1	314	SUPERFAMILY	SSF57850	RING/U-box	226	288	7.42e-06	-	-
poly_jg8374.t1	314	Gene3D	G3DSA:3.30.40.10	Zinc/RING finger domain, C3HC4 (zinc finger)	208	286	4.4e-06	IPR013083	Zinc finger, RING/FYVE/PHD-type
poly_jg4883.t1	374	SUPERFAMILY	SSF52096	ClpP/crotonase	21	344	8.82e-59	IPR029045	ClpP/crotonase-like domain superfamily
poly_jg4883.t1	374	Pfam	PF16113	Enoyl-CoA hydratase/isomerase	31	358	4.4e-123	IPR045004	Enoyl-CoA hydratase/isomerase domain
poly_jg4883.t1	374	Gene3D	G3DSA:3.90.226.10	-	16	368	6.5e-121	-	-
poly_jg3193.t1	180	Gene3D	G3DSA:2.60.120.740	-	13	103	6.8e-05	IPR043159	D-galactoside/L-rhamnose binding SUEL lectin domain superfamily
poly_jg2324.t1	619	SUPERFAMILY	SSF57850	RING/U-box	542	615	7.73e-10	-	-
poly_jg2324.t1	619	Gene3D	G3DSA:3.30.40.10	Zinc/RING finger domain, C3HC4 (zinc finger)	533	614	1.1e-08	IPR013083	Zinc finger, RING/FYVE/PHD-type
poly_jg356.t1	364	Gene3D	G3DSA:3.40.50.300	-	47	234	2.5e-11	IPR027417	P-loop containing nucleoside triphosphate hydrolase
poly_jg356.t1	364	SUPERFAMILY	SSF52540	P-loop containing nucleoside triphosphate hydrolases	52	216	6.09e-14	IPR027417	P-loop containing nucleoside triphosphate hydrolase
poly_jg4681.t1	518	SUPERFAMILY	SSF52833	Thioredoxin-like	161	273	3.32e-17	IPR036249	Thioredoxin-like superfamily
poly_jg4681.t1	518	Pfam	PF00226	DnaJ domain	3	64	9.2e-26	IPR001623	DnaJ domain
poly_jg4681.t1	518	Gene3D	G3DSA:1.10.287.110	DnaJ domain	1	114	1.3e-36	IPR036869	Chaperone J-domain superfamily
poly_jg4681.t1	518	Pfam	PF00085	Thioredoxin	169	248	4.2e-08	IPR013766	Thioredoxin domain
poly_jg4681.t1	518	SUPERFAMILY	SSF46565	Chaperone J-domain	3	105	2.75e-30	IPR036869	Chaperone J-domain superfamily
poly_jg4681.t1	518	Gene3D	G3DSA:3.40.30.10	Glutaredoxin	150	296	1.2e-19	-	-
poly_jg5918.t1	267	Gene3D	G3DSA:3.30.60.10	-	1	46	3.3e-05	IPR036861	Endochitinase-like superfamily
poly_jg5918.t1	267	Gene3D	G3DSA:3.30.60.10	-	111	156	1e-06	IPR036861	Endochitinase-like superfamily
poly_jg9565.t2	646	Gene3D	G3DSA:3.30.40.10	Zinc/RING finger domain, C3HC4 (zinc finger)	560	641	6.1e-07	IPR013083	Zinc finger, RING/FYVE/PHD-type
poly_jg9565.t2	646	SUPERFAMILY	SSF57850	RING/U-box	577	641	1.01e-05	-	-
poly_jg6378.t1	206	Pfam	PF02301	HORMA domain	10	191	6.7e-21	IPR003511	HORMA domain
poly_jg6378.t1	206	SUPERFAMILY	SSF56019	The spindle assembly checkpoint protein mad2	4	200	3.14e-60	IPR036570	HORMA domain superfamily
poly_jg6378.t1	206	Gene3D	G3DSA:3.30.900.10	HORMA domain	1	204	3.3e-73	IPR036570	HORMA domain superfamily
poly_jg7464.t1	619	SUPERFAMILY	SSF57850	RING/U-box	557	613	1.1e-06	-	-
poly_jg5425.t1	820	Pfam	PF01167	Tub family	616	727	1.9e-08	IPR000007	Tubby, C-terminal
poly_jg5425.t1	820	Pfam	PF01167	Tub family	734	814	1.7e-19	IPR000007	Tubby, C-terminal
poly_jg5425.t1	820	SUPERFAMILY	SSF54518	Tubby C-terminal domain-like	632	817	8.89e-39	IPR025659	Tubby-like, C-terminal
poly_jg5425.t1	820	Gene3D	G3DSA:3.20.90.10	Tubby Protein; Chain A	592	819	1.3e-35	IPR025659	Tubby-like, C-terminal
poly_jg733.t1	137	Gene3D	G3DSA:2.60.40.4060	Reeler domain	6	137	5.4e-12	IPR042307	Reeler domain superfamily
poly_jg733.t1	137	Pfam	PF02014	Reeler domain	26	130	1.2e-12	IPR002861	Reeler domain
poly_jg3091.t1	203	Gene3D	G3DSA:3.40.630.10	Zn peptidases	41	203	1.6e-41	-	-
poly_jg3091.t1	203	SUPERFAMILY	SSF53187	Zn-dependent exopeptidases	45	199	1.71e-22	-	-
poly_jg3091.t1	203	Pfam	PF04952	Succinylglutamate desuccinylase / Aspartoacylase family	47	201	1.2e-20	IPR007036	Succinylglutamate desuccinylase/aspartoacylase
poly_jg2040.t1	250	Gene3D	G3DSA:2.30.180.10	FAS1 domain	1	130	3.7e-24	IPR036378	FAS1 domain superfamily
poly_jg2040.t1	250	Pfam	PF02469	Fasciclin domain	13	129	3.6e-19	IPR000782	FAS1 domain
poly_jg2040.t1	250	SUPERFAMILY	SSF82153	FAS1 domain	2	129	4.32e-24	IPR036378	FAS1 domain superfamily
poly_jg3058.t1	202	Gene3D	G3DSA:4.10.410.10	Pancreatic trypsin inhibitor Kunitz domain	102	169	6.4e-17	IPR036880	Pancreatic trypsin inhibitor Kunitz domain superfamily
poly_jg3058.t1	202	Pfam	PF00014	Kunitz/Bovine pancreatic trypsin inhibitor domain	108	158	2.7e-15	IPR002223	Pancreatic trypsin inhibitor Kunitz domain
poly_jg3058.t1	202	SUPERFAMILY	SSF57362	BPTI-like	105	161	5.96e-16	IPR036880	Pancreatic trypsin inhibitor Kunitz domain superfamily
poly_jg5415.t1	264	Gene3D	G3DSA:3.60.15.10	-	7	254	3.8e-06	IPR036866	Ribonuclease Z/Hydroxyacylglutathione hydrolase-like
poly_jg5415.t1	264	SUPERFAMILY	SSF56281	Metallo-hydrolase/oxidoreductase	7	234	6.09e-09	IPR036866	Ribonuclease Z/Hydroxyacylglutathione hydrolase-like
poly_jg7983.t1	822	Gene3D	G3DSA:1.10.510.10	Transferase(Phosphotransferase) domain 1	537	768	1.4e-116	-	-
poly_jg7983.t1	822	SUPERFAMILY	SSF56112	Protein kinase-like (PK-like)	452	747	2.97e-88	IPR011009	Protein kinase-like domain superfamily
poly_jg7983.t1	822	Pfam	PF00069	Protein kinase domain	453	744	5.5e-68	IPR000719	Protein kinase domain
poly_jg7983.t1	822	Gene3D	G3DSA:3.30.200.20	Phosphorylase Kinase; domain 1	452	774	1.4e-116	-	-
poly_jg2739.t1	285	Gene3D	G3DSA:3.40.33.10	CAP	95	281	1.4e-16	IPR035940	CAP superfamily
poly_jg2739.t1	285	Pfam	PF00188	Cysteine-rich secretory protein family	164	278	9.4e-12	IPR014044	CAP domain
poly_jg2739.t1	285	SUPERFAMILY	SSF55797	PR-1-like	162	279	8.76e-14	IPR035940	CAP superfamily
poly_jg5745.t1	757	SUPERFAMILY	SSF57414	Hairpin loop containing domain-like	27	75	5.49e-05	-	-
poly_jg5295.t1	301	Pfam	PF07722	Peptidase C26	4	217	7.7e-16	IPR011697	Peptidase C26
poly_jg5295.t1	301	SUPERFAMILY	SSF52317	Class I glutamine amidotransferase-like	19	288	1.24e-29	IPR029062	Class I glutamine amidotransferase-like
poly_jg5295.t1	301	Gene3D	G3DSA:3.40.50.880	-	1	289	7.4e-79	IPR029062	Class I glutamine amidotransferase-like
poly_jg2715.t1	452	SUPERFAMILY	SSF48557	L-aspartase-like	55	408	5.34e-121	IPR008948	L-Aspartase-like
poly_jg2715.t1	452	Gene3D	G3DSA:1.10.275.10	-	49	155	1.4e-37	IPR024083	Fumarase/histidase, N-terminal
poly_jg2715.t1	452	Pfam	PF00206	Lyase	55	349	1.7e-72	IPR022761	Fumarate lyase, N-terminal
poly_jg2715.t1	452	Gene3D	G3DSA:1.20.200.10	Fumarase/aspartase (Central domain)	156	420	8.8e-96	-	-
poly_jg2176.t1	366	SUPERFAMILY	SSF52540	P-loop containing nucleoside triphosphate hydrolases	25	216	6.24e-13	IPR027417	P-loop containing nucleoside triphosphate hydrolase
poly_jg2176.t1	366	Pfam	PF01926	50S ribosome-binding GTPase	33	144	5.2e-07	IPR006073	GTP binding domain
poly_jg2176.t1	366	Gene3D	G3DSA:3.40.50.300	-	14	233	1.2e-15	IPR027417	P-loop containing nucleoside triphosphate hydrolase
poly_jg9438.t1	423	Pfam	PF00433	Protein kinase C terminal domain	370	408	0.00013	IPR017892	Protein kinase, C-terminal
poly_jg9438.t1	423	Gene3D	G3DSA:3.30.200.20	Phosphorylase Kinase; domain 1	55	381	1.7e-107	-	-
poly_jg9438.t1	423	Pfam	PF00069	Protein kinase domain	58	349	5.2e-63	IPR000719	Protein kinase domain
poly_jg9438.t1	423	Gene3D	G3DSA:1.10.510.10	Transferase(Phosphotransferase) domain 1	141	369	1.7e-107	-	-
poly_jg9438.t1	423	SUPERFAMILY	SSF56112	Protein kinase-like (PK-like)	54	392	6.47e-87	IPR011009	Protein kinase-like domain superfamily
poly_jg543.t1	634	Gene3D	G3DSA:1.25.40.20	-	485	625	3.5e-06	IPR036770	Ankyrin repeat-containing domain superfamily
poly_jg543.t1	634	SUPERFAMILY	SSF48403	Ankyrin repeat	460	577	7.96e-06	IPR036770	Ankyrin repeat-containing domain superfamily
poly_jg274.t1	488	SUPERFAMILY	SSF50952	Soluble quinoprotein glucose dehydrogenase	19	377	2.75e-10	IPR011041	Soluble quinoprotein glucose/sorbosone dehydrogenase
poly_jg274.t1	488	Pfam	PF07995	Glucose / Sorbosone dehydrogenase	25	294	2.7e-10	IPR012938	Glucose/Sorbosone dehydrogenase
poly_jg274.t1	488	Gene3D	G3DSA:2.120.10.30	-	13	438	9.9e-54	IPR011042	Six-bladed beta-propeller, TolB-like
poly_jg8879.t1	415	Pfam	PF04886	PT repeat	126	160	4.5e-08	IPR006970	PT repeat
poly_jg8879.t1	415	Pfam	PF04886	PT repeat	78	112	4.5e-07	IPR006970	PT repeat
poly_jg8879.t1	415	Pfam	PF04886	PT repeat	381	414	2e-07	IPR006970	PT repeat
poly_jg8879.t1	415	Pfam	PF04886	PT repeat	321	356	3.8e-09	IPR006970	PT repeat
poly_jg8879.t1	415	Pfam	PF04886	PT repeat	349	384	4e-07	IPR006970	PT repeat
poly_jg8879.t1	415	Pfam	PF04886	PT repeat	138	172	1.2e-06	IPR006970	PT repeat
poly_jg6168.t1	704	Gene3D	G3DSA:3.30.40.10	Zinc/RING finger domain, C3HC4 (zinc finger)	595	675	2.2e-12	IPR013083	Zinc finger, RING/FYVE/PHD-type
poly_jg6168.t1	704	SUPERFAMILY	SSF57850	RING/U-box	607	671	9.34e-13	-	-
poly_jg6168.t1	704	Pfam	PF13923	Zinc finger, C3HC4 type (RING finger)	635	664	1.7e-07	-	-
poly_jg4346.t1	515	Gene3D	G3DSA:1.25.40.20	-	122	308	1.2e-29	IPR036770	Ankyrin repeat-containing domain superfamily
poly_jg4346.t1	515	SUPERFAMILY	SSF48403	Ankyrin repeat	130	433	7.2e-50	IPR036770	Ankyrin repeat-containing domain superfamily
poly_jg4346.t1	515	Gene3D	G3DSA:1.25.40.20	-	309	442	4.9e-27	IPR036770	Ankyrin repeat-containing domain superfamily
poly_jg4346.t1	515	Pfam	PF12796	Ankyrin repeats (3 copies)	351	432	5.6e-08	IPR002110	Ankyrin repeat
poly_jg4346.t1	515	Pfam	PF12796	Ankyrin repeats (3 copies)	142	231	2e-14	IPR002110	Ankyrin repeat
poly_jg8775.t1	97	SUPERFAMILY	SSF50182	Sm-like ribonucleoproteins	11	94	2.07e-23	IPR010920	LSM domain superfamily
poly_jg8775.t1	97	Pfam	PF01423	LSM domain	21	92	2.9e-19	IPR001163	Sm domain, eukaryotic/archaea-type
poly_jg8775.t1	97	Gene3D	G3DSA:2.30.30.100	-	6	97	2.5e-37	-	-
poly_jg4434.t1	434	Gene3D	G3DSA:3.40.50.410	von Willebrand factor, type A domain	1	196	1.8e-08	IPR036465	von Willebrand factor A-like domain superfamily
poly_jg4434.t1	434	SUPERFAMILY	SSF53300	vWA-like	12	191	1.2e-08	IPR036465	von Willebrand factor A-like domain superfamily
poly_jg2893.t1	496	Pfam	PF13848	Thioredoxin-like domain	144	322	9.7e-16	-	-
poly_jg2893.t1	496	Gene3D	G3DSA:3.40.30.10	Glutaredoxin	5	106	2.4e-12	-	-
poly_jg2893.t1	496	SUPERFAMILY	SSF52833	Thioredoxin-like	9	110	5.11e-14	IPR036249	Thioredoxin-like superfamily
poly_jg2893.t1	496	Gene3D	G3DSA:3.40.30.10	Glutaredoxin	334	464	1.8e-16	-	-
poly_jg2893.t1	496	SUPERFAMILY	SSF52833	Thioredoxin-like	343	450	7.8e-15	IPR036249	Thioredoxin-like superfamily
poly_jg2893.t1	496	Gene3D	G3DSA:3.40.30.10	Glutaredoxin	219	333	5.3e-25	-	-
poly_jg2893.t1	496	SUPERFAMILY	SSF52833	Thioredoxin-like	214	335	2.05e-13	IPR036249	Thioredoxin-like superfamily
poly_jg2893.t1	496	Pfam	PF00085	Thioredoxin	349	446	4.7e-07	IPR013766	Thioredoxin domain
poly_jg2893.t1	496	Pfam	PF00085	Thioredoxin	10	105	1.7e-06	IPR013766	Thioredoxin domain
poly_jg2893.t1	496	Gene3D	G3DSA:3.40.30.10	Glutaredoxin	107	218	3e-09	-	-
poly_jg705.t1	207	Pfam	PF02815	MIR domain	71	125	3.8e-07	IPR016093	MIR motif
poly_jg705.t1	207	Gene3D	G3DSA:2.80.10.50	-	1	189	2.5e-43	-	-
poly_jg705.t1	207	SUPERFAMILY	SSF82109	MIR domain	6	180	2.09e-39	IPR036300	Mir domain superfamily
poly_jg7441.t1	184	Gene3D	G3DSA:3.30.60.10	-	22	60	2.2e-05	IPR036861	Endochitinase-like superfamily
poly_jg7199.t1	422	SUPERFAMILY	SSF51197	Clavaminate synthase-like	96	402	3.57e-31	-	-
poly_jg7199.t1	422	Gene3D	G3DSA:2.60.120.650	Cupin	115	368	1.2e-26	-	-
poly_jg7199.t1	422	SUPERFAMILY	SSF48452	TPR-like	7	97	7.17e-17	IPR011990	Tetratricopeptide-like helical domain superfamily
poly_jg7199.t1	422	Pfam	PF00515	Tetratricopeptide repeat	42	73	7.9e-09	IPR001440	Tetratricopeptide repeat 1
poly_jg7199.t1	422	Gene3D	G3DSA:1.25.40.10	Tetratricopeptide repeat domain	3	114	2.2e-19	IPR011990	Tetratricopeptide-like helical domain superfamily
poly_jg7199.t1	422	Pfam	PF13621	Cupin-like domain	259	351	1.8e-11	IPR041667	Cupin-like domain 8
poly_jg2187.t2	838	Pfam	PF15020	Cation channel sperm-associated protein subunit delta	687	819	3.6e-15	IPR028751	Cation channel sperm-associated auxiliary subunit delta/epsilon
poly_jg36.t1	311	Pfam	PF00112	Papain family cysteine protease	91	307	2.6e-45	IPR000668	Peptidase C1A, papain C-terminal
poly_jg36.t1	311	Pfam	PF08246	Cathepsin propeptide inhibitor domain (I29)	5	62	3.3e-12	IPR013201	Cathepsin propeptide inhibitor domain (I29)
poly_jg36.t1	311	SUPERFAMILY	SSF54001	Cysteine proteinases	3	307	3.32e-70	IPR038765	Papain-like cysteine peptidase superfamily
poly_jg36.t1	311	Gene3D	G3DSA:3.90.70.10	Cysteine proteinases	2	309	4.6e-76	-	-
poly_jg9057.t1	376	Pfam	PF04577	Glycosyltransferase 61	118	300	2.9e-18	IPR007657	Glycosyltransferase 61
poly_jg8815.t1	410	Gene3D	G3DSA:1.10.510.10	Transferase(Phosphotransferase) domain 1	151	393	1.7e-35	-	-
poly_jg8815.t1	410	SUPERFAMILY	SSF56112	Protein kinase-like (PK-like)	153	363	2.43e-40	IPR011009	Protein kinase-like domain superfamily
poly_jg8815.t1	410	Pfam	PF00069	Protein kinase domain	159	357	7.1e-29	IPR000719	Protein kinase domain
poly_jg2227.t1	278	Pfam	PF00194	Eukaryotic-type carbonic anhydrase	9	266	4.4e-56	IPR001148	Alpha carbonic anhydrase domain
poly_jg2227.t1	278	SUPERFAMILY	SSF51069	Carbonic anhydrase	3	266	3.14e-53	IPR036398	Alpha carbonic anhydrase domain superfamily
poly_jg2227.t1	278	Gene3D	G3DSA:3.10.200.10	Alpha carbonic anhydrase	4	273	7e-60	IPR036398	Alpha carbonic anhydrase domain superfamily
poly_jg2253.t1	224	Gene3D	G3DSA:3.10.110.10	Ubiquitin Conjugating Enzyme	32	185	2e-05	IPR016135	Ubiquitin-conjugating enzyme/RWD-like
poly_jg4456.t1	345	Gene3D	G3DSA:3.40.50.300	-	48	211	4.7e-11	IPR027417	P-loop containing nucleoside triphosphate hydrolase
poly_jg4456.t1	345	SUPERFAMILY	SSF52540	P-loop containing nucleoside triphosphate hydrolases	47	135	7.12e-11	IPR027417	P-loop containing nucleoside triphosphate hydrolase
poly_jg4456.t1	345	Pfam	PF01926	50S ribosome-binding GTPase	55	116	2.7e-07	IPR006073	GTP binding domain
poly_jg2335.t1	422	SUPERFAMILY	SSF48403	Ankyrin repeat	357	413	3.38e-05	IPR036770	Ankyrin repeat-containing domain superfamily
poly_jg2335.t1	422	Gene3D	G3DSA:1.25.40.20	-	329	418	2.2e-05	IPR036770	Ankyrin repeat-containing domain superfamily
poly_jg5851.t1	90	SUPERFAMILY	SSF81383	F-box domain	2	42	1.7e-06	IPR036047	F-box-like domain superfamily
poly_jg4001.t1	836	Gene3D	G3DSA:3.30.40.10	Zinc/RING finger domain, C3HC4 (zinc finger)	752	829	1.3e-08	IPR013083	Zinc finger, RING/FYVE/PHD-type
poly_jg4001.t1	836	SUPERFAMILY	SSF57850	RING/U-box	770	832	5.47e-08	-	-
poly_jg2664.t1	316	Pfam	PF00300	Histidine phosphatase superfamily (branch 1)	72	142	6.4e-05	IPR013078	Histidine phosphatase superfamily, clade-1
poly_jg2664.t1	316	Gene3D	G3DSA:3.40.50.1240	-	38	311	2.3e-15	IPR029033	Histidine phosphatase superfamily
poly_jg2664.t1	316	SUPERFAMILY	SSF53254	Phosphoglycerate mutase-like	38	248	4.5e-13	IPR029033	Histidine phosphatase superfamily
poly_jg7637.t1	298	Gene3D	G3DSA:1.25.40.20	-	25	258	4e-16	IPR036770	Ankyrin repeat-containing domain superfamily
poly_jg7637.t1	298	SUPERFAMILY	SSF48403	Ankyrin repeat	59	228	2.18e-15	IPR036770	Ankyrin repeat-containing domain superfamily
poly_jg7637.t1	298	Pfam	PF12796	Ankyrin repeats (3 copies)	131	222	3.3e-08	IPR002110	Ankyrin repeat
poly_jg7290.t2	323	Gene3D	G3DSA:2.60.40.1970	YEATS domain	108	256	7.3e-34	IPR038704	YEATS superfamily
poly_jg7290.t2	323	Gene3D	G3DSA:3.30.60.10	-	7	49	3.5e-05	IPR036861	Endochitinase-like superfamily
poly_jg7290.t2	323	Pfam	PF03366	YEATS family	148	213	8.5e-24	IPR005033	YEATS
poly_jg8851.t1	278	Gene3D	G3DSA:3.30.60.10	-	98	136	6.3e-05	IPR036861	Endochitinase-like superfamily
poly_jg4759.t1	202	SUPERFAMILY	SSF55797	PR-1-like	3	161	2.62e-26	IPR035940	CAP superfamily
poly_jg4759.t1	202	Pfam	PF00188	Cysteine-rich secretory protein family	14	147	2.2e-15	IPR014044	CAP domain
poly_jg4759.t1	202	Gene3D	G3DSA:3.40.33.10	CAP	3	185	1e-34	IPR035940	CAP superfamily
poly_jg26.t1	590	Gene3D	G3DSA:3.30.40.10	Zinc/RING finger domain, C3HC4 (zinc finger)	530	587	7.8e-15	IPR013083	Zinc finger, RING/FYVE/PHD-type
poly_jg26.t1	590	SUPERFAMILY	SSF57850	RING/U-box	534	582	9.59e-18	-	-
poly_jg26.t1	590	Pfam	PF13639	Ring finger domain	534	576	7.2e-10	IPR001841	Zinc finger, RING-type
poly_jg428.t1	122	Gene3D	G3DSA:1.10.287.2900	-	18	88	3.4e-10	-	-
poly_jg2678.t1	114	SUPERFAMILY	SSF54403	Cystatin/monellin	17	83	1.92e-09	IPR046350	Cystatin superfamily
poly_jg2678.t1	114	Gene3D	G3DSA:3.10.450.10	-	2	100	4.2e-13	-	-
poly_jg2410.t1	642	Gene3D	G3DSA:1.10.418.30	Ncd80 complex, Ncd80 subunit	113	231	9.2e-33	IPR038273	Ndc80 domain superfamily
poly_jg2410.t1	642	Gene3D	G3DSA:6.10.250.1950	-	247	354	4e-07	-	-
poly_jg2410.t1	642	Pfam	PF18077	Domain of unknown function (DUF5595)	250	311	5.6e-07	IPR040967	Domain of unknown function DUF5595
poly_jg2410.t1	642	Pfam	PF03801	HEC/Ndc80p family	96	242	2.8e-34	IPR005550	Kinetochore protein Ndc80
poly_jg5913.t1	605	SUPERFAMILY	SSF48056	Di-copper centre-containing domain	7	181	1.96e-21	IPR008922	Di-copper centre-containing domain superfamily
poly_jg5913.t1	605	Pfam	PF00264	Common central domain of tyrosinase	39	87	1.5e-06	IPR002227	Tyrosinase copper-binding domain
poly_jg5913.t1	605	Gene3D	G3DSA:1.10.1280.10	-	6	218	2.4e-22	IPR008922	Di-copper centre-containing domain superfamily
poly_jg9389.t1	371	SUPERFAMILY	SSF48403	Ankyrin repeat	257	345	7.46e-07	IPR036770	Ankyrin repeat-containing domain superfamily
poly_jg9389.t1	371	Gene3D	G3DSA:1.25.40.20	-	178	358	7.6e-07	IPR036770	Ankyrin repeat-containing domain superfamily
poly_jg4632.t1	854	Gene3D	G3DSA:2.60.120.260	-	3	196	1.2e-59	-	-
poly_jg4632.t1	854	Gene3D	G3DSA:3.20.20.80	Glycosidases	302	658	5.7e-122	-	-
poly_jg4632.t1	854	SUPERFAMILY	SSF49303	beta-Galactosidase/glucuronidase domain	197	303	6.47e-12	IPR036156	Beta-Galactosidase/glucuronidase domain superfamily
poly_jg4632.t1	854	SUPERFAMILY	SSF51445	(Trans)glycosidases	300	660	8.29e-88	IPR017853	Glycoside hydrolase superfamily
poly_jg4632.t1	854	Gene3D	G3DSA:2.60.40.10	Immunoglobulins	197	301	4.7e-11	IPR013783	Immunoglobulin-like fold
poly_jg4632.t1	854	SUPERFAMILY	SSF49785	Galactose-binding domain-like	5	193	1.18e-40	IPR008979	Galactose-binding-like domain superfamily
poly_jg4632.t1	854	Pfam	PF00703	Glycosyl hydrolases family 2	200	303	2.8e-06	IPR006102	Glycoside hydrolase, family 2, immunoglobulin-like beta-sandwich
poly_jg4632.t1	854	Pfam	PF17753	Ig-fold domain	755	837	4e-08	IPR041625	Beta-mannosidase, Ig-fold domain
poly_jg4632.t1	854	Gene3D	G3DSA:2.60.40.10	Immunoglobulins	750	839	1.5e-06	IPR013783	Immunoglobulin-like fold
poly_jg1000.t1	121	Pfam	PF00031	Cystatin domain	45	99	4.3e-05	IPR000010	Cystatin domain
poly_jg1000.t1	121	SUPERFAMILY	SSF54403	Cystatin/monellin	34	114	4.54e-08	IPR046350	Cystatin superfamily
poly_jg1000.t1	121	Gene3D	G3DSA:3.10.450.10	-	16	118	5e-13	-	-
poly_jg9167.t1	717	Gene3D	G3DSA:1.25.40.20	-	539	717	1.2e-05	IPR036770	Ankyrin repeat-containing domain superfamily
poly_jg9167.t1	717	Gene3D	G3DSA:1.25.40.20	-	338	520	4.3e-06	IPR036770	Ankyrin repeat-containing domain superfamily
poly_jg9167.t1	717	SUPERFAMILY	SSF48403	Ankyrin repeat	471	715	4.7e-13	IPR036770	Ankyrin repeat-containing domain superfamily
poly_jg3145.t1	292	Pfam	PF01764	Lipase (class 3)	74	209	1.7e-33	IPR002921	Fungal lipase-like domain
poly_jg3145.t1	292	Gene3D	G3DSA:3.40.50.1820	alpha/beta hydrolase	4	277	3.9e-63	IPR029058	Alpha/Beta hydrolase fold
poly_jg3145.t1	292	SUPERFAMILY	SSF53474	alpha/beta-Hydrolases	7	272	3.11e-47	IPR029058	Alpha/Beta hydrolase fold
poly_jg1116.t1	754	Gene3D	G3DSA:2.60.120.740	-	602	706	1.2e-07	IPR043159	D-galactoside/L-rhamnose binding SUEL lectin domain superfamily
poly_jg7641.t1	128	Pfam	PF08806	Sep15/SelM redox domain	58	124	3.1e-06	IPR014912	Selenoprotein F/M domain
poly_jg7641.t1	128	Gene3D	G3DSA:3.40.30.50	-	53	124	1.1e-10	IPR038219	Selenoprotein F/M, thioredoxin-like domain superfamily
poly_jg7641.t1	128	SUPERFAMILY	SSF52833	Thioredoxin-like	40	125	4.81e-10	IPR036249	Thioredoxin-like superfamily
poly_jg9022.t1	331	Gene3D	G3DSA:3.40.33.10	CAP	1	164	1.7e-25	IPR035940	CAP superfamily
poly_jg9022.t1	331	Pfam	PF00188	Cysteine-rich secretory protein family	13	132	1.3e-10	IPR014044	CAP domain
poly_jg9022.t1	331	SUPERFAMILY	SSF55797	PR-1-like	4	142	4.19e-26	IPR035940	CAP superfamily
poly_jg8212.t1	595	Gene3D	G3DSA:3.40.630.10	Zn peptidases	81	447	6.5e-122	-	-
poly_jg8212.t1	595	Gene3D	G3DSA:3.30.70.360	-	254	369	6.5e-122	-	-
poly_jg8212.t1	595	SUPERFAMILY	SSF55031	Bacterial exopeptidase dimerisation domain	259	370	1.38e-18	IPR036264	Bacterial exopeptidase dimerisation domain
poly_jg8212.t1	595	Pfam	PF01546	Peptidase family M20/M25/M40	144	458	1.1e-35	IPR002933	Peptidase M20
poly_jg8212.t1	595	SUPERFAMILY	SSF53187	Zn-dependent exopeptidases	76	458	5.29e-74	-	-
poly_jg1204.t1	321	Gene3D	G3DSA:1.10.510.10	Transferase(Phosphotransferase) domain 1	11	301	8.9e-36	-	-
poly_jg1204.t1	321	Pfam	PF00069	Protein kinase domain	22	221	4e-23	IPR000719	Protein kinase domain
poly_jg1204.t1	321	SUPERFAMILY	SSF56112	Protein kinase-like (PK-like)	20	265	3.51e-37	IPR011009	Protein kinase-like domain superfamily
poly_jg2590.t1	253	Pfam	PF00187	Chitin recognition protein	21	55	1.2e-06	IPR001002	Chitin-binding, type 1
poly_jg2590.t1	253	SUPERFAMILY	SSF57016	Plant lectins/antimicrobial peptides	30	49	1.44e-05	IPR036861	Endochitinase-like superfamily
poly_jg2590.t1	253	Gene3D	G3DSA:3.30.60.10	-	20	58	6.6e-07	IPR036861	Endochitinase-like superfamily
poly_jg2877.t1	735	Pfam	PF05089	Alpha-N-acetylglucosaminidase (NAGLU) tim-barrel domain	101	435	3.5e-137	IPR024733	Alpha-N-acetylglucosaminidase, tim-barrel domain
poly_jg2877.t1	735	Gene3D	G3DSA:3.30.379.10	-	2	94	8.5e-20	IPR029018	Beta-hexosaminidase-like, domain 2
poly_jg2877.t1	735	Pfam	PF12971	Alpha-N-acetylglucosaminidase (NAGLU) N-terminal domain	4	85	5.8e-17	IPR024240	Alpha-N-acetylglucosaminidase, N-terminal
poly_jg2877.t1	735	Gene3D	G3DSA:3.20.20.80	Glycosidases	97	436	1.9e-141	-	-
poly_jg2877.t1	735	Pfam	PF12972	Alpha-N-acetylglucosaminidase (NAGLU) C-terminal domain	443	711	3.8e-74	IPR024732	Alpha-N-acetylglucosaminidase, C-terminal
poly_jg2877.t1	735	Gene3D	G3DSA:1.20.120.670	-	437	721	4.9e-83	-	-
poly_jg6986.t1	133	SUPERFAMILY	SSF100895	Kazal-type serine protease inhibitors	6	53	1.05e-10	IPR036058	Kazal domain superfamily
poly_jg6986.t1	133	Gene3D	G3DSA:3.30.60.30	-	11	55	2.7e-11	-	-
poly_jg6986.t1	133	Pfam	PF07648	Kazal-type serine protease inhibitor domain	11	52	1.2e-07	IPR002350	Kazal domain
poly_jg9507.t1	527	SUPERFAMILY	SSF57850	RING/U-box	465	513	3.53e-14	-	-
poly_jg9507.t1	527	Pfam	PF13639	Ring finger domain	464	507	3.2e-08	IPR001841	Zinc finger, RING-type
poly_jg9507.t1	527	Gene3D	G3DSA:3.30.40.10	Zinc/RING finger domain, C3HC4 (zinc finger)	425	512	1.9e-12	IPR013083	Zinc finger, RING/FYVE/PHD-type
poly_jg9711.t1	771	Pfam	PF02140	Galactose binding lectin domain	629	692	8.1e-09	IPR000922	D-galactoside/L-rhamnose binding SUEL lectin domain
poly_jg9711.t1	771	Gene3D	G3DSA:2.60.120.740	-	610	723	1.1e-08	IPR043159	D-galactoside/L-rhamnose binding SUEL lectin domain superfamily
poly_jg460.t1	665	Gene3D	G3DSA:3.30.40.10	Zinc/RING finger domain, C3HC4 (zinc finger)	569	645	4.8e-07	IPR013083	Zinc finger, RING/FYVE/PHD-type
poly_jg460.t1	665	SUPERFAMILY	SSF57850	RING/U-box	581	651	2.83e-10	-	-
poly_jg7553.t1	705	Pfam	PF13639	Ring finger domain	623	665	4.4e-10	IPR001841	Zinc finger, RING-type
poly_jg7553.t1	705	Gene3D	G3DSA:3.30.40.10	Zinc/RING finger domain, C3HC4 (zinc finger)	608	678	1.5e-14	IPR013083	Zinc finger, RING/FYVE/PHD-type
poly_jg7553.t1	705	SUPERFAMILY	SSF57850	RING/U-box	605	672	2.95e-17	-	-
poly_jg7501.t1	319	Pfam	PF00651	BTB/POZ domain	93	189	3.4e-16	IPR000210	BTB/POZ domain
poly_jg7501.t1	319	SUPERFAMILY	SSF54695	POZ domain	82	186	1.37e-15	IPR011333	SKP1/BTB/POZ domain superfamily
poly_jg7501.t1	319	Gene3D	G3DSA:3.30.710.10	Potassium Channel Kv1.1; Chain A	63	190	2.8e-18	IPR011333	SKP1/BTB/POZ domain superfamily
poly_jg2327.t1	670	SUPERFAMILY	SSF57850	RING/U-box	583	656	9.9e-15	-	-
poly_jg2327.t1	670	Pfam	PF13639	Ring finger domain	601	650	2.2e-08	IPR001841	Zinc finger, RING-type
poly_jg2327.t1	670	Gene3D	G3DSA:3.30.40.10	Zinc/RING finger domain, C3HC4 (zinc finger)	587	660	6.5e-12	IPR013083	Zinc finger, RING/FYVE/PHD-type
poly_jg2899.t1	587	Pfam	PF00264	Common central domain of tyrosinase	216	301	7e-14	IPR002227	Tyrosinase copper-binding domain
poly_jg2899.t1	587	Pfam	PF00264	Common central domain of tyrosinase	345	393	1.1e-11	IPR002227	Tyrosinase copper-binding domain
poly_jg2899.t1	587	Gene3D	G3DSA:2.60.120.290	Spermadhesin, CUB domain	13	137	5.8e-10	IPR035914	Spermadhesin, CUB domain superfamily
poly_jg2899.t1	587	SUPERFAMILY	SSF49854	Spermadhesin, CUB domain	30	116	5.89e-08	IPR035914	Spermadhesin, CUB domain superfamily
poly_jg2899.t1	587	Gene3D	G3DSA:1.10.1280.10	-	185	471	1.5e-52	IPR008922	Di-copper centre-containing domain superfamily
poly_jg2899.t1	587	SUPERFAMILY	SSF48056	Di-copper centre-containing domain	155	464	2.94e-48	IPR008922	Di-copper centre-containing domain superfamily
poly_jg2899.t1	587	Gene3D	G3DSA:2.10.25.10	Laminin	138	174	2.6e-05	-	-
poly_jg5180.t1	375	SUPERFAMILY	SSF50630	Acid proteases	35	361	5.11e-74	IPR021109	Aspartic peptidase domain superfamily
poly_jg5180.t1	375	Pfam	PF00026	Eukaryotic aspartyl protease	51	362	2.3e-61	IPR033121	Peptidase family A1 domain
poly_jg5180.t1	375	Gene3D	G3DSA:2.40.70.10	Acid Proteases	42	287	3.8e-54	IPR021109	Aspartic peptidase domain superfamily
poly_jg5180.t1	375	Gene3D	G3DSA:2.40.70.10	Acid Proteases	288	362	4.7e-16	IPR021109	Aspartic peptidase domain superfamily
poly_jg5866.t1	122	Gene3D	G3DSA:1.10.287.2250	-	3	72	3.2e-15	-	-
poly_jg5866.t1	122	SUPERFAMILY	SSF54001	Cysteine proteinases	5	78	3.43e-14	IPR038765	Papain-like cysteine peptidase superfamily
poly_jg5866.t1	122	Pfam	PF08246	Cathepsin propeptide inhibitor domain (I29)	9	67	2.1e-10	IPR013201	Cathepsin propeptide inhibitor domain (I29)
poly_jg780.t1	719	SUPERFAMILY	SSF48371	ARM repeat	136	579	2.38e-05	IPR016024	Armadillo-type fold
poly_jg780.t1	719	Pfam	PF13639	Ring finger domain	634	686	2.4e-06	IPR001841	Zinc finger, RING-type
poly_jg780.t1	719	Gene3D	G3DSA:3.30.40.10	Zinc/RING finger domain, C3HC4 (zinc finger)	627	690	6.3e-11	IPR013083	Zinc finger, RING/FYVE/PHD-type
poly_jg780.t1	719	SUPERFAMILY	SSF57850	RING/U-box	633	694	1.31e-13	-	-
poly_jg8973.t1	221	Gene3D	G3DSA:3.30.60.10	-	17	59	8.7e-06	IPR036861	Endochitinase-like superfamily
poly_jg6696.t1	208	Gene3D	G3DSA:3.40.30.10	Glutaredoxin	8	203	8.3e-48	-	-
poly_jg6696.t1	208	Pfam	PF14497	Glutathione S-transferase, C-terminal domain	100	203	9.3e-12	IPR004046	Glutathione S-transferase, C-terminal
poly_jg6696.t1	208	SUPERFAMILY	SSF52833	Thioredoxin-like	6	76	1.82e-14	IPR036249	Thioredoxin-like superfamily
poly_jg6696.t1	208	SUPERFAMILY	SSF47616	GST C-terminal domain-like	80	202	1.1e-13	IPR036282	Glutathione S-transferase, C-terminal domain superfamily
poly_jg6696.t1	208	Gene3D	G3DSA:1.20.1050.10	-	79	195	8.3e-48	-	-
poly_jg8601.t1	524	Gene3D	G3DSA:2.70.70.10	Glucose Permease (Domain IIA)	231	429	1.9e-26	IPR011055	Duplicated hybrid motif
poly_jg8601.t1	524	SUPERFAMILY	SSF51261	Duplicated hybrid motif	300	383	3.4e-16	IPR011055	Duplicated hybrid motif
poly_jg8601.t1	524	Pfam	PF01551	Peptidase family M23	304	380	3.5e-10	IPR016047	Peptidase M23
poly_jg6147.t1	209	SUPERFAMILY	SSF57016	Plant lectins/antimicrobial peptides	2	40	8.64e-08	IPR036861	Endochitinase-like superfamily
poly_jg6147.t1	209	Gene3D	G3DSA:3.30.60.10	-	88	153	1.2e-07	IPR036861	Endochitinase-like superfamily
poly_jg6147.t1	209	Gene3D	G3DSA:3.30.60.10	-	1	44	1.2e-08	IPR036861	Endochitinase-like superfamily
poly_jg6147.t1	209	SUPERFAMILY	SSF57016	Plant lectins/antimicrobial peptides	103	146	7.23e-05	IPR036861	Endochitinase-like superfamily
poly_jg6147.t1	209	Gene3D	G3DSA:3.30.60.10	-	161	201	1.2e-08	IPR036861	Endochitinase-like superfamily
poly_jg6147.t1	209	SUPERFAMILY	SSF57016	Plant lectins/antimicrobial peptides	167	195	7.86e-06	IPR036861	Endochitinase-like superfamily
poly_jg6147.t1	209	Pfam	PF00187	Chitin recognition protein	2	36	7.6e-08	IPR001002	Chitin-binding, type 1
poly_jg6147.t1	209	Pfam	PF00187	Chitin recognition protein	163	197	1.5e-06	IPR001002	Chitin-binding, type 1
poly_jg5864.t1	334	Gene3D	G3DSA:3.90.70.10	Cysteine proteinases	4	320	1.5e-97	-	-
poly_jg5864.t1	334	SUPERFAMILY	SSF54001	Cysteine proteinases	7	319	1.19e-95	IPR038765	Papain-like cysteine peptidase superfamily
poly_jg5864.t1	334	Pfam	PF00112	Papain family cysteine protease	98	319	3.8e-68	IPR000668	Peptidase C1A, papain C-terminal
poly_jg5864.t1	334	Pfam	PF08246	Cathepsin propeptide inhibitor domain (I29)	10	70	8.2e-13	IPR013201	Cathepsin propeptide inhibitor domain (I29)
poly_jg2069.t1	164	Pfam	PF02469	Fasciclin domain	11	125	1.4e-28	IPR000782	FAS1 domain
poly_jg2069.t1	164	SUPERFAMILY	SSF82153	FAS1 domain	2	126	4.05e-32	IPR036378	FAS1 domain superfamily
poly_jg2069.t1	164	Gene3D	G3DSA:2.30.180.10	FAS1 domain	4	126	3.3e-31	IPR036378	FAS1 domain superfamily
poly_jg7230.t1	567	Pfam	PF18266	Nicastrin small lobe	7	162	5.6e-22	IPR041084	Nicastrin, small lobe
poly_jg7230.t1	567	Gene3D	G3DSA:3.40.630.10	Zn peptidases	144	399	2.1e-08	-	-
poly_jg7230.t1	567	Pfam	PF05450	Nicastrin	197	396	9.1e-22	-	-
poly_jg7230.t1	567	SUPERFAMILY	SSF53187	Zn-dependent exopeptidases	174	316	1.1e-05	-	-
poly_jg7517.t1	151	SUPERFAMILY	SSF57016	Plant lectins/antimicrobial peptides	26	49	3.8e-05	IPR036861	Endochitinase-like superfamily
poly_jg7517.t1	151	Gene3D	G3DSA:3.30.60.10	-	17	60	8.4e-07	IPR036861	Endochitinase-like superfamily
poly_jg7732.t1	430	Pfam	PF00450	Serine carboxypeptidase	16	416	4.9e-112	IPR001563	Peptidase S10, serine carboxypeptidase
poly_jg7732.t1	430	Gene3D	G3DSA:3.40.50.1820	alpha/beta hydrolase	4	422	2.2e-126	IPR029058	Alpha/Beta hydrolase fold
poly_jg7732.t1	430	SUPERFAMILY	SSF53474	alpha/beta-Hydrolases	16	418	6.18e-109	IPR029058	Alpha/Beta hydrolase fold
poly_jg3503.t1	319	Pfam	PF00052	Laminin B (Domain IV)	174	306	5.6e-07	IPR000034	Laminin IV
poly_jg5485.t1	217	SUPERFAMILY	SSF57016	Plant lectins/antimicrobial peptides	22	58	2.36e-06	IPR036861	Endochitinase-like superfamily
poly_jg5485.t1	217	Gene3D	G3DSA:3.30.60.10	-	22	58	2.2e-05	IPR036861	Endochitinase-like superfamily
poly_jg4153.t1	853	Pfam	PF00069	Protein kinase domain	445	607	1.9e-17	IPR000719	Protein kinase domain
poly_jg4153.t1	853	Gene3D	G3DSA:1.10.510.10	Transferase(Phosphotransferase) domain 1	436	613	1.4e-25	-	-
poly_jg4153.t1	853	SUPERFAMILY	SSF56112	Protein kinase-like (PK-like)	442	604	4.99e-32	IPR011009	Protein kinase-like domain superfamily
poly_jg8773.t1	813	Pfam	PF00082	Subtilase family	222	591	2.4e-36	IPR000209	Peptidase S8/S53 domain
poly_jg8773.t1	813	Gene3D	G3DSA:3.40.50.200	Peptidase S8/S53 domain	208	599	3e-57	IPR036852	Peptidase S8/S53 domain superfamily
poly_jg8773.t1	813	SUPERFAMILY	SSF52743	Subtilisin-like	216	601	4.58e-48	IPR036852	Peptidase S8/S53 domain superfamily
poly_jg8773.t1	813	Gene3D	G3DSA:2.60.120.380	-	620	728	1.7e-17	-	-
poly_jg8773.t1	813	SUPERFAMILY	SSF49785	Galactose-binding domain-like	620	728	8.25e-15	IPR008979	Galactose-binding-like domain superfamily
poly_jg1419.t1	224	Pfam	PF00188	Cysteine-rich secretory protein family	11	134	4.8e-17	IPR014044	CAP domain
poly_jg1419.t1	224	Gene3D	G3DSA:3.40.33.10	CAP	4	163	1.8e-25	IPR035940	CAP superfamily
poly_jg1419.t1	224	SUPERFAMILY	SSF55797	PR-1-like	5	136	8.89e-28	IPR035940	CAP superfamily
poly_jg5232.t1	342	Pfam	PF02163	Peptidase family M50	240	334	9.2e-07	IPR008915	Peptidase M50
poly_jg5232.t1	342	Gene3D	G3DSA:2.40.10.120	-	16	233	8.5e-63	-	-
poly_jg5232.t1	342	SUPERFAMILY	SSF50156	PDZ domain-like	237	328	1.71e-16	IPR036034	PDZ superfamily
poly_jg5232.t1	342	Gene3D	G3DSA:2.30.42.10	-	234	337	1.5e-21	IPR036034	PDZ superfamily
poly_jg5232.t1	342	Pfam	PF13180	PDZ domain	238	328	9.2e-10	IPR001478	PDZ domain
poly_jg5232.t1	342	SUPERFAMILY	SSF50494	Trypsin-like serine proteases	26	235	6.13e-52	IPR009003	Peptidase S1, PA clan
poly_jg5232.t1	342	Pfam	PF13365	Trypsin-like peptidase domain	58	202	1.8e-29	-	-
poly_jg8863.t1	216	Gene3D	G3DSA:1.20.1050.10	-	77	190	2.8e-54	-	-
poly_jg8863.t1	216	Pfam	PF02798	Glutathione S-transferase, N-terminal domain	6	71	7e-08	IPR004045	Glutathione S-transferase, N-terminal
poly_jg8863.t1	216	SUPERFAMILY	SSF47616	GST C-terminal domain-like	78	203	1.67e-17	IPR036282	Glutathione S-transferase, C-terminal domain superfamily
poly_jg8863.t1	216	Pfam	PF14497	Glutathione S-transferase, C-terminal domain	104	200	5.5e-13	IPR004046	Glutathione S-transferase, C-terminal
poly_jg8863.t1	216	Gene3D	G3DSA:3.40.30.10	Glutaredoxin	7	198	2.8e-54	-	-
poly_jg8863.t1	216	SUPERFAMILY	SSF52833	Thioredoxin-like	4	71	2.58e-14	IPR036249	Thioredoxin-like superfamily
poly_jg2655.t1	301	Gene3D	G3DSA:3.40.50.1240	-	48	288	3.9e-06	IPR029033	Histidine phosphatase superfamily
poly_jg2594.t1	150	SUPERFAMILY	SSF56112	Protein kinase-like (PK-like)	74	136	1.64e-11	IPR011009	Protein kinase-like domain superfamily
poly_jg2594.t1	150	Pfam	PF00069	Protein kinase domain	80	134	1.1e-08	IPR000719	Protein kinase domain
poly_jg2594.t1	150	Gene3D	G3DSA:1.10.510.10	Transferase(Phosphotransferase) domain 1	73	149	2.8e-10	-	-
poly_jg8668.t1	155	SUPERFAMILY	SSF54534	FKBP-like	39	148	1.24e-32	-	-
poly_jg8668.t1	155	Pfam	PF00254	FKBP-type peptidyl-prolyl cis-trans isomerase	57	146	2.6e-23	IPR001179	FKBP-type peptidyl-prolyl cis-trans isomerase domain
poly_jg8668.t1	155	Gene3D	G3DSA:3.10.50.40	-	22	154	1.4e-35	IPR046357	Peptidyl-prolyl cis-trans isomerase domain superfamily
poly_jg2795.t3	816	Pfam	PF07699	Tyrosine-protein kinase ephrin type A/B receptor-like	680	730	1.9e-05	IPR011641	Tyrosine-protein kinase ephrin type A/B receptor-like
poly_jg2795.t3	816	Gene3D	G3DSA:2.60.120.200	-	37	207	5.8e-08	-	-
poly_jg2795.t3	816	Gene3D	G3DSA:2.10.50.10	Tumor Necrosis Factor Receptor, subunit A, domain 2	687	746	5.6e-08	-	-
poly_jg2795.t3	816	Gene3D	G3DSA:2.10.50.10	Tumor Necrosis Factor Receptor, subunit A, domain 2	747	807	4.5e-07	-	-
poly_jg2795.t3	816	Gene3D	G3DSA:2.10.50.10	Tumor Necrosis Factor Receptor, subunit A, domain 2	531	596	6.6e-08	-	-
poly_jg2795.t3	816	Gene3D	G3DSA:2.10.50.10	Tumor Necrosis Factor Receptor, subunit A, domain 2	626	686	4.5e-09	-	-
poly_jg2795.t3	816	SUPERFAMILY	SSF57184	Growth factor receptor domain	674	807	4.12e-13	IPR009030	Growth factor receptor cysteine-rich domain superfamily
poly_jg2795.t3	816	SUPERFAMILY	SSF57184	Growth factor receptor domain	560	714	8.64e-12	IPR009030	Growth factor receptor cysteine-rich domain superfamily
poly_jg2795.t3	816	SUPERFAMILY	SSF57184	Growth factor receptor domain	477	598	5.89e-05	IPR009030	Growth factor receptor cysteine-rich domain superfamily
poly_jg2795.t3	816	SUPERFAMILY	SSF49899	Concanavalin A-like lectins/glucanases	48	203	3.84e-06	IPR013320	Concanavalin A-like lectin/glucanase domain superfamily
poly_jg7663.t2	914	SUPERFAMILY	SSF53067	Actin-like ATPase domain	196	387	9.18e-64	IPR043129	ATPase, nucleotide binding domain
poly_jg7663.t2	914	SUPERFAMILY	SSF53067	Actin-like ATPase domain	10	194	3.52e-70	IPR043129	ATPase, nucleotide binding domain
poly_jg7663.t2	914	Gene3D	G3DSA:3.30.420.40	-	12	384	5.7e-173	-	-
poly_jg7663.t2	914	Gene3D	G3DSA:2.60.34.10	Substrate Binding Domain Of DNAk; Chain A, domain 1	391	544	5e-65	IPR029047	Heat shock protein 70kD, peptide-binding domain superfamily
poly_jg7663.t2	914	Gene3D	G3DSA:1.20.1270.10	-	545	619	1.5e-23	IPR029048	Heat shock protein 70kD, C-terminal domain superfamily
poly_jg7663.t2	914	Gene3D	G3DSA:3.30.420.40	-	195	367	5.7e-173	-	-
poly_jg7663.t2	914	Pfam	PF00012	Hsp70 protein	11	618	4.6e-242	IPR013126	Heat shock protein 70 family
poly_jg7663.t2	914	SUPERFAMILY	SSF100920	Heat shock protein 70kD (HSP70), peptide-binding domain	392	548	2.75e-58	IPR029047	Heat shock protein 70kD, peptide-binding domain superfamily
poly_jg7663.t2	914	SUPERFAMILY	SSF100934	Heat shock protein 70kD (HSP70), C-terminal subdomain	542	623	4.45e-20	IPR029048	Heat shock protein 70kD, C-terminal domain superfamily
poly_jg7663.t2	914	Gene3D	G3DSA:3.30.30.30	-	75	129	5.7e-173	-	-
poly_jg7663.t2	914	Gene3D	G3DSA:3.90.640.10	Actin; Chain A, domain 4	237	319	5.7e-173	-	-
poly_jg6782.t1	499	Gene3D	G3DSA:6.10.140.1430	-	281	340	1.5e-05	-	-
poly_jg6782.t1	499	Gene3D	G3DSA:1.20.120.20	Apolipoprotein	45	204	8.2e-08	-	-
poly_jg6782.t1	499	SUPERFAMILY	SSF58113	Apolipoprotein A-I	82	219	1.83e-06	-	-
poly_jg585.t1	218	Gene3D	G3DSA:3.40.50.150	Vaccinia Virus protein VP39	8	218	9.9e-40	IPR029063	S-adenosyl-L-methionine-dependent methyltransferase superfamily
poly_jg585.t1	218	Pfam	PF13578	Methyltransferase domain	67	171	1.7e-07	-	-
poly_jg585.t1	218	SUPERFAMILY	SSF53335	S-adenosyl-L-methionine-dependent methyltransferases	11	193	2.24e-18	IPR029063	S-adenosyl-L-methionine-dependent methyltransferase superfamily
poly_jg6012.t1	473	Gene3D	G3DSA:3.40.50.1820	alpha/beta hydrolase	26	449	4.2e-150	IPR029058	Alpha/Beta hydrolase fold
poly_jg6012.t1	473	Gene3D	G3DSA:1.20.120.980	Serine carboxypeptidase S28, SKS domain	186	348	4.2e-150	IPR042269	Serine carboxypeptidase S28, SKS domain
poly_jg6012.t1	473	Pfam	PF05577	Serine carboxypeptidase S28	29	439	1.8e-85	IPR008758	Peptidase S28
poly_jg6012.t1	473	SUPERFAMILY	SSF53474	alpha/beta-Hydrolases	50	186	6.84e-20	IPR029058	Alpha/Beta hydrolase fold
poly_jg4819.t1	498	Gene3D	G3DSA:1.25.40.20	-	351	478	1.3e-07	IPR036770	Ankyrin repeat-containing domain superfamily
poly_jg4819.t1	498	SUPERFAMILY	SSF48403	Ankyrin repeat	22	430	1.24e-18	IPR036770	Ankyrin repeat-containing domain superfamily
poly_jg4819.t1	498	Gene3D	G3DSA:1.25.40.20	-	242	350	3.2e-12	IPR036770	Ankyrin repeat-containing domain superfamily
poly_jg4819.t1	498	Gene3D	G3DSA:1.25.40.20	-	6	237	4.7e-13	IPR036770	Ankyrin repeat-containing domain superfamily
poly_jg4819.t1	498	Pfam	PF13637	Ankyrin repeats (many copies)	295	338	1.6e-06	IPR002110	Ankyrin repeat
poly_jg8229.t1	387	Pfam	PF04577	Glycosyltransferase 61	159	301	2.1e-21	IPR007657	Glycosyltransferase 61
poly_jg2392.t1	526	SUPERFAMILY	SSF48403	Ankyrin repeat	322	462	5.8e-06	IPR036770	Ankyrin repeat-containing domain superfamily
poly_jg511.t1	196	Pfam	PF14295	PAN domain	110	128	0.13	IPR003609	PAN/Apple domain
poly_jg511.t1	196	Pfam	PF14295	PAN domain	7	44	0.0028	IPR003609	PAN/Apple domain
poly_jg1317.t1	207	SUPERFAMILY	SSF51206	cAMP-binding domain-like	44	169	2.88e-19	IPR018490	Cyclic nucleotide-binding domain superfamily
poly_jg1317.t1	207	Gene3D	G3DSA:2.60.120.10	Jelly Rolls	35	176	8.7e-24	IPR014710	RmlC-like jelly roll fold
poly_jg1317.t1	207	Pfam	PF00027	Cyclic nucleotide-binding domain	79	165	1.5e-09	IPR000595	Cyclic nucleotide-binding domain
poly_jg2650.t1	318	SUPERFAMILY	SSF53254	Phosphoglycerate mutase-like	38	284	5.72e-14	IPR029033	Histidine phosphatase superfamily
poly_jg2650.t1	318	Gene3D	G3DSA:3.40.50.1240	-	37	306	1.8e-13	IPR029033	Histidine phosphatase superfamily
poly_jg2650.t1	318	Pfam	PF00300	Histidine phosphatase superfamily (branch 1)	84	145	6.4e-05	IPR013078	Histidine phosphatase superfamily, clade-1
poly_jg8902.t1	423	Pfam	PF05023	Phytochelatin synthase	2	158	1.2e-26	IPR007719	Phytochelatin synthase, N-terminal catalytic domain
poly_jg8902.t1	423	Pfam	PF05023	Phytochelatin synthase	201	406	7.1e-53	IPR007719	Phytochelatin synthase, N-terminal catalytic domain
poly_jg8902.t1	423	SUPERFAMILY	SSF54001	Cysteine proteinases	205	417	2.45e-48	IPR038765	Papain-like cysteine peptidase superfamily
poly_jg8902.t1	423	SUPERFAMILY	SSF54001	Cysteine proteinases	5	157	3.53e-24	IPR038765	Papain-like cysteine peptidase superfamily
poly_jg8902.t1	423	Gene3D	G3DSA:3.90.70.30	-	208	421	5.7e-55	IPR038156	Phytochelatin synthase, N-terminal domain superfamily
poly_jg8902.t1	423	Gene3D	G3DSA:3.90.70.30	-	8	167	5.3e-28	IPR038156	Phytochelatin synthase, N-terminal domain superfamily
poly_jg9878.t1	501	Pfam	PF07732	Multicopper oxidase	93	169	8.7e-07	IPR011707	Multicopper oxidase, N-terminal
poly_jg9878.t1	501	Gene3D	G3DSA:2.60.40.420	-	195	315	2.4e-14	IPR008972	Cupredoxin
poly_jg9878.t1	501	Pfam	PF07731	Multicopper oxidase	357	457	3.5e-09	IPR011706	Multicopper oxidase, C-terminal
poly_jg9878.t1	501	SUPERFAMILY	SSF49503	Cupredoxins	44	170	2.41e-14	IPR008972	Cupredoxin
poly_jg9878.t1	501	SUPERFAMILY	SSF49503	Cupredoxins	328	454	5.2e-12	IPR008972	Cupredoxin
poly_jg9878.t1	501	Gene3D	G3DSA:2.60.40.420	-	24	194	1e-23	IPR008972	Cupredoxin
poly_jg9878.t1	501	Gene3D	G3DSA:2.60.40.420	-	345	484	7.4e-19	IPR008972	Cupredoxin
poly_jg9878.t1	501	SUPERFAMILY	SSF49503	Cupredoxins	216	458	2.49e-17	IPR008972	Cupredoxin
poly_jg9729.t1	320	SUPERFAMILY	SSF50685	Barwin-like endoglucanases	16	120	2.62e-08	IPR036908	RlpA-like domain superfamily
poly_jg9729.t1	320	Gene3D	G3DSA:2.60.40.760	-	117	209	3.7e-09	IPR036749	Expansin, cellulose-binding-like domain superfamily
poly_jg4580.t1	142	SUPERFAMILY	SSF57016	Plant lectins/antimicrobial peptides	79	118	2.11e-06	IPR036861	Endochitinase-like superfamily
poly_jg4580.t1	142	Gene3D	G3DSA:3.30.60.10	-	1	59	8.5e-08	IPR036861	Endochitinase-like superfamily
poly_jg4580.t1	142	Gene3D	G3DSA:3.30.60.10	-	72	121	1.3e-07	IPR036861	Endochitinase-like superfamily
poly_jg4580.t1	142	SUPERFAMILY	SSF57016	Plant lectins/antimicrobial peptides	2	56	1.63e-06	IPR036861	Endochitinase-like superfamily
poly_jg3144.t1	267	Gene3D	G3DSA:3.40.50.1820	alpha/beta hydrolase	9	250	2e-51	IPR029058	Alpha/Beta hydrolase fold
poly_jg3144.t1	267	Pfam	PF01764	Lipase (class 3)	77	204	3.7e-26	IPR002921	Fungal lipase-like domain
poly_jg3144.t1	267	SUPERFAMILY	SSF53474	alpha/beta-Hydrolases	18	247	7.09e-38	IPR029058	Alpha/Beta hydrolase fold
poly_jg1497.t1	313	Gene3D	G3DSA:1.10.530.10	-	95	313	9.3e-41	-	-
poly_jg1497.t1	313	Gene3D	G3DSA:3.30.20.10	Endochitinase, domain 2	175	230	6e-20	-	-
poly_jg1497.t1	313	SUPERFAMILY	SSF53955	Lysozyme-like	99	313	3.37e-53	IPR023346	Lysozyme-like domain superfamily
poly_jg1497.t1	313	Pfam	PF00182	Chitinase class I	107	313	7.8e-41	IPR000726	Glycoside hydrolase, family 19, catalytic
poly_jg1313.t1	290	Gene3D	G3DSA:2.70.98.10	-	11	288	4.6e-87	IPR014718	Glycoside hydrolase-type carbohydrate-binding
poly_jg1313.t1	290	SUPERFAMILY	SSF74650	Galactose mutarotase-like	18	281	2.95e-55	IPR011013	Galactose mutarotase-like domain superfamily
poly_jg1313.t1	290	Pfam	PF01263	Aldose 1-epimerase	26	281	4.8e-44	IPR008183	Aldose 1-/Glucose-6-phosphate 1-epimerase
poly_jg2968.t1	425	SUPERFAMILY	SSF100895	Kazal-type serine protease inhibitors	331	374	1.29e-11	IPR036058	Kazal domain superfamily
poly_jg2968.t1	425	Gene3D	G3DSA:3.30.60.30	-	333	376	4.7e-13	-	-
poly_jg2968.t1	425	Gene3D	G3DSA:3.30.60.30	-	276	332	2.5e-13	-	-
poly_jg2968.t1	425	SUPERFAMILY	SSF100895	Kazal-type serine protease inhibitors	177	221	1.66e-13	IPR036058	Kazal domain superfamily
poly_jg2968.t1	425	Gene3D	G3DSA:2.40.50.120	-	1	113	3e-16	IPR008993	Tissue inhibitor of metalloproteinases-like, OB-fold
poly_jg2968.t1	425	Pfam	PF00050	Kazal-type serine protease inhibitor domain	181	221	1.8e-09	IPR002350	Kazal domain
poly_jg2968.t1	425	SUPERFAMILY	SSF100895	Kazal-type serine protease inhibitors	378	422	5.27e-11	IPR036058	Kazal domain superfamily
poly_jg2968.t1	425	Gene3D	G3DSA:3.30.60.30	-	175	221	3.6e-15	-	-
poly_jg2968.t1	425	SUPERFAMILY	SSF50242	TIMP-like	1	142	7.26e-12	IPR008993	Tissue inhibitor of metalloproteinases-like, OB-fold
poly_jg2968.t1	425	SUPERFAMILY	SSF100895	Kazal-type serine protease inhibitors	278	325	7.07e-12	IPR036058	Kazal domain superfamily
poly_jg2968.t1	425	Pfam	PF07648	Kazal-type serine protease inhibitor domain	378	421	3e-08	IPR002350	Kazal domain
poly_jg2968.t1	425	Pfam	PF07648	Kazal-type serine protease inhibitor domain	279	313	5.1e-09	IPR002350	Kazal domain
poly_jg2968.t1	425	Pfam	PF07648	Kazal-type serine protease inhibitor domain	332	374	9.5e-09	IPR002350	Kazal domain
poly_jg2968.t1	425	Gene3D	G3DSA:3.30.60.30	-	377	423	5e-12	-	-
poly_jg2968.t1	425	Pfam	PF01759	UNC-6/NTR/C345C module	7	104	8.8e-07	IPR018933	Netrin module, non-TIMP type
poly_jg5522.t1	247	SUPERFAMILY	SSF56112	Protein kinase-like (PK-like)	4	179	7.42e-23	IPR011009	Protein kinase-like domain superfamily
poly_jg5522.t1	247	Pfam	PF00069	Protein kinase domain	5	160	1.4e-12	IPR000719	Protein kinase domain
poly_jg5522.t1	247	Gene3D	G3DSA:1.10.510.10	Transferase(Phosphotransferase) domain 1	1	174	2.5e-19	-	-
poly_jg8910.t1	180	Gene3D	G3DSA:3.50.30.30	-	16	136	3.3e-06	-	-
poly_jg8910.t1	180	SUPERFAMILY	SSF52025	PA domain	20	104	5.1e-06	IPR046450	PA domain superfamily
poly_jg3048.t1	626	Gene3D	G3DSA:3.40.50.2000	Glycogen Phosphorylase B;	386	544	5.3e-48	-	-
poly_jg3048.t1	626	SUPERFAMILY	SSF53756	UDP-Glycosyltransferase/glycogen phosphorylase	152	565	1.29e-39	-	-
poly_jg3048.t1	626	Pfam	PF03033	Glycosyltransferase family 28 N-terminal domain	154	208	3.5e-07	IPR004276	Glycosyltransferase family 28, N-terminal domain
poly_jg3048.t1	626	Gene3D	G3DSA:3.40.50.2000	Glycogen Phosphorylase B;	152	385	5.3e-48	-	-
poly_jg1797.t1	375	Gene3D	G3DSA:3.40.30.10	Glutaredoxin	116	228	1e-06	-	-
poly_jg1797.t1	375	Pfam	PF00085	Thioredoxin	9	110	1.8e-30	IPR013766	Thioredoxin domain
poly_jg1797.t1	375	SUPERFAMILY	SSF52833	Thioredoxin-like	4	114	7.35e-34	IPR036249	Thioredoxin-like superfamily
poly_jg1797.t1	375	SUPERFAMILY	SSF52833	Thioredoxin-like	264	340	5.76e-07	IPR036249	Thioredoxin-like superfamily
poly_jg1797.t1	375	Gene3D	G3DSA:3.40.30.10	Glutaredoxin	244	342	2.5e-05	-	-
poly_jg1797.t1	375	Gene3D	G3DSA:3.40.30.10	Glutaredoxin	1	115	5.8e-39	-	-
poly_jg5628.t1	238	Pfam	PF00967	Barwin family	46	93	0.00017	IPR001153	Barwin domain
poly_jg5628.t1	238	SUPERFAMILY	SSF50685	Barwin-like endoglucanases	14	107	2.09e-13	IPR036908	RlpA-like domain superfamily
poly_jg5628.t1	238	Gene3D	G3DSA:2.40.40.10	-	7	112	3e-11	IPR036908	RlpA-like domain superfamily
poly_jg5863.t1	325	Pfam	PF08246	Cathepsin propeptide inhibitor domain (I29)	7	67	1e-13	IPR013201	Cathepsin propeptide inhibitor domain (I29)
poly_jg5863.t1	325	SUPERFAMILY	SSF54001	Cysteine proteinases	5	311	7.37e-102	IPR038765	Papain-like cysteine peptidase superfamily
poly_jg5863.t1	325	Gene3D	G3DSA:3.90.70.10	Cysteine proteinases	3	312	3.1e-102	-	-
poly_jg5863.t1	325	Pfam	PF00112	Papain family cysteine protease	93	310	8.2e-74	IPR000668	Peptidase C1A, papain C-terminal
poly_jg9494.t1	351	Pfam	PF02140	Galactose binding lectin domain	216	294	4e-08	IPR000922	D-galactoside/L-rhamnose binding SUEL lectin domain
poly_jg9494.t1	351	Gene3D	G3DSA:2.60.120.740	-	208	301	1.1e-06	IPR043159	D-galactoside/L-rhamnose binding SUEL lectin domain superfamily
poly_jg9923.t1	156	SUPERFAMILY	SSF81296	E set domains	2	130	7.93e-13	IPR014756	Immunoglobulin E-set
poly_jg9923.t1	156	Pfam	PF02221	ML domain	4	129	2.2e-17	IPR003172	MD-2-related lipid-recognition domain
poly_jg9923.t1	156	Gene3D	G3DSA:2.60.40.770	-	2	133	9e-14	-	-
poly_jg9679.t1	305	SUPERFAMILY	SSF57850	RING/U-box	247	297	3.53e-14	-	-
poly_jg9679.t1	305	Pfam	PF13639	Ring finger domain	247	290	3.1e-09	IPR001841	Zinc finger, RING-type
poly_jg9679.t1	305	Gene3D	G3DSA:3.30.40.10	Zinc/RING finger domain, C3HC4 (zinc finger)	213	296	2.7e-13	IPR013083	Zinc finger, RING/FYVE/PHD-type
poly_jg8335.t1	197	SUPERFAMILY	SSF57016	Plant lectins/antimicrobial peptides	16	48	2.88e-07	IPR036861	Endochitinase-like superfamily
poly_jg8335.t1	197	Gene3D	G3DSA:3.30.60.10	-	15	61	1.3e-08	IPR036861	Endochitinase-like superfamily
poly_jg8335.t1	197	Pfam	PF00187	Chitin recognition protein	16	49	6.3e-07	IPR001002	Chitin-binding, type 1
poly_jg7605.t1	315	Gene3D	G3DSA:3.40.50.1820	alpha/beta hydrolase	30	283	1.1e-10	IPR029058	Alpha/Beta hydrolase fold
poly_jg2649.t1	324	Gene3D	G3DSA:3.40.50.1240	-	32	294	3.1e-10	IPR029033	Histidine phosphatase superfamily
poly_jg2649.t1	324	SUPERFAMILY	SSF53254	Phosphoglycerate mutase-like	39	191	1.18e-08	IPR029033	Histidine phosphatase superfamily
poly_jg5535.t1	188	Gene3D	G3DSA:3.40.50.300	-	1	166	9.3e-10	IPR027417	P-loop containing nucleoside triphosphate hydrolase
poly_jg5535.t1	188	SUPERFAMILY	SSF52540	P-loop containing nucleoside triphosphate hydrolases	10	154	5.06e-11	IPR027417	P-loop containing nucleoside triphosphate hydrolase
poly_jg2082.t1	455	Pfam	PF01522	Polysaccharide deacetylase	26	148	1.1e-06	IPR002509	NodB homology domain
poly_jg2082.t1	455	Gene3D	G3DSA:3.20.20.370	Glycoside hydrolase/deacetylase	45	275	1.2e-34	-	-
poly_jg2082.t1	455	SUPERFAMILY	SSF88713	Glycoside hydrolase/deacetylase	24	275	1.84e-26	IPR011330	Glycoside hydrolase/deacetylase, beta/alpha-barrel
poly_jg6363.t1	865	Gene3D	G3DSA:2.60.40.1760	glycosyl hydrolase (family 31)	17	243	1.1e-57	-	-
poly_jg6363.t1	865	Pfam	PF16863	N-terminal barrel of NtMGAM and CtMGAM, maltase-glucoamylase	27	138	2e-12	IPR031727	Galactose mutarotase, N-terminal barrel
poly_jg6363.t1	865	Pfam	PF01055	Glycosyl hydrolases family 31	223	724	1.8e-147	IPR000322	Glycoside hydrolase family 31
poly_jg6363.t1	865	Pfam	PF13802	Galactose mutarotase-like	140	205	1.1e-12	IPR025887	Glycoside hydrolase family 31, N-terminal domain
poly_jg6363.t1	865	SUPERFAMILY	SSF74650	Galactose mutarotase-like	48	230	7.85e-33	IPR011013	Galactose mutarotase-like domain superfamily
poly_jg6363.t1	865	Gene3D	G3DSA:2.60.40.1180	-	625	725	1e-19	IPR013780	Glycosyl hydrolase, all-beta
poly_jg6363.t1	865	Gene3D	G3DSA:3.20.20.80	Glycosidases	244	624	2.5e-131	-	-
poly_jg6363.t1	865	SUPERFAMILY	SSF51011	Glycosyl hydrolase domain	643	720	4.68e-13	-	-
poly_jg6363.t1	865	SUPERFAMILY	SSF51445	(Trans)glycosidases	231	640	5.05e-83	IPR017853	Glycoside hydrolase superfamily
poly_jg6363.t1	865	Gene3D	G3DSA:2.60.40.1180	-	726	865	2.7e-17	IPR013780	Glycosyl hydrolase, all-beta
poly_jg7965.t1	389	Gene3D	G3DSA:1.10.287.1490	-	10	154	3.7e-07	-	-
poly_jg7965.t1	389	Gene3D	G3DSA:1.10.287.1490	-	184	351	7.5e-06	-	-
poly_jg7965.t1	389	SUPERFAMILY	SSF57997	Tropomyosin	35	138	6.87e-05	-	-
poly_jg7965.t1	389	SUPERFAMILY	SSF57997	Tropomyosin	186	338	1.57e-05	-	-
poly_jg2965.t1	307	SUPERFAMILY	SSF53254	Phosphoglycerate mutase-like	42	287	5.22e-17	IPR029033	Histidine phosphatase superfamily
poly_jg2965.t1	307	Gene3D	G3DSA:3.40.50.1240	-	43	299	3.7e-19	IPR029033	Histidine phosphatase superfamily
poly_jg3797.t1	473	Pfam	PF01979	Amidohydrolase family	130	430	2.7e-27	IPR006680	Amidohydrolase-related
poly_jg3797.t1	473	SUPERFAMILY	SSF51338	Composite domain of metallo-dependent hydrolases	341	434	6.4e-06	IPR011059	Metal-dependent hydrolase, composite domain superfamily
poly_jg3797.t1	473	SUPERFAMILY	SSF51556	Metallo-dependent hydrolases	65	367	1.02e-47	IPR032466	Metal-dependent hydrolase
poly_jg3797.t1	473	Gene3D	G3DSA:2.30.40.10	Urease, subunit C, domain 1	360	440	7.9e-06	IPR011059	Metal-dependent hydrolase, composite domain superfamily
poly_jg3797.t1	473	Gene3D	G3DSA:3.20.20.140	-	127	359	3.7e-30	-	-
poly_jg3797.t1	473	Gene3D	G3DSA:3.20.20.140	-	66	126	8.4e-10	-	-
poly_jg7577.t1	407	Gene3D	G3DSA:3.40.50.1820	alpha/beta hydrolase	4	395	2.7e-125	IPR029058	Alpha/Beta hydrolase fold
poly_jg7577.t1	407	SUPERFAMILY	SSF53474	alpha/beta-Hydrolases	6	389	3.78e-117	IPR029058	Alpha/Beta hydrolase fold
poly_jg7577.t1	407	Pfam	PF00450	Serine carboxypeptidase	6	388	9.5e-108	IPR001563	Peptidase S10, serine carboxypeptidase
poly_jg5396.t1	236	Gene3D	G3DSA:3.40.50.150	Vaccinia Virus protein VP39	72	201	2.2e-12	IPR029063	S-adenosyl-L-methionine-dependent methyltransferase superfamily
poly_jg5396.t1	236	SUPERFAMILY	SSF53335	S-adenosyl-L-methionine-dependent methyltransferases	53	192	1.56e-14	IPR029063	S-adenosyl-L-methionine-dependent methyltransferase superfamily
poly_jg314.t1	768	Gene3D	G3DSA:1.50.10.10	-	328	768	8.4e-156	IPR012341	Six-hairpin glycosidase-like superfamily
poly_jg314.t1	768	SUPERFAMILY	SSF48208	Six-hairpin glycosidases	341	768	3.64e-73	IPR008928	Six-hairpin glycosidase superfamily
poly_jg314.t1	768	Gene3D	G3DSA:2.70.98.110	-	1	326	2.6e-55	IPR038518	Glycosyl hydrolase family 63, N-terminal domain superfamily
poly_jg314.t1	768	Pfam	PF03200	Glycosyl hydrolase family 63 C-terminal domain	304	766	1.8e-153	IPR031335	Glycosyl hydrolase family 63, C-terminal
poly_jg314.t1	768	Pfam	PF16923	Glycosyl hydrolase family 63 N-terminal domain	4	210	6.7e-35	IPR031631	Glycosyl hydrolase family 63, N-terminal
poly_jg406.t1	404	Pfam	PF03351	DOMON domain	22	159	4.9e-10	-	-
poly_jg4577.t1	209	Gene3D	G3DSA:3.40.50.300	-	14	203	1.1e-06	IPR027417	P-loop containing nucleoside triphosphate hydrolase
poly_jg7770.t1	211	SUPERFAMILY	SSF50685	Barwin-like endoglucanases	12	108	1.88e-13	IPR036908	RlpA-like domain superfamily
poly_jg7770.t1	211	Gene3D	G3DSA:2.40.40.10	-	7	111	6e-11	IPR036908	RlpA-like domain superfamily
poly_jg2761.t1	560	Gene3D	G3DSA:3.60.21.10	-	235	546	4.4e-80	IPR029052	Metallo-dependent phosphatase-like
poly_jg2761.t1	560	Gene3D	G3DSA:2.60.40.380	-	127	232	2e-13	-	-
poly_jg2761.t1	560	Pfam	PF14008	Iron/zinc purple acid phosphatase-like protein C	479	538	1.1e-09	IPR025733	Iron/zinc purple acid phosphatase-like C-terminal domain
poly_jg2761.t1	560	SUPERFAMILY	SSF56300	Metallo-dependent phosphatases	239	533	7.78e-47	IPR029052	Metallo-dependent phosphatase-like
poly_jg2761.t1	560	SUPERFAMILY	SSF49363	Purple acid phosphatase, N-terminal domain	116	225	4.32e-18	IPR008963	Purple acid phosphatase-like, N-terminal
poly_jg2761.t1	560	Pfam	PF17808	Fn3-like domain from Purple Acid Phosphatase	32	124	8.8e-24	IPR040974	Purple acid phosphatase, Fn3-like domain
poly_jg2761.t1	560	Pfam	PF00149	Calcineurin-like phosphoesterase	273	456	1.5e-17	IPR004843	Calcineurin-like phosphoesterase domain, ApaH type
poly_jg2761.t1	560	Pfam	PF16656	Purple acid Phosphatase, N-terminal domain	128	225	6.6e-14	IPR015914	Purple acid phosphatase, N-terminal
poly_jg1628.t1	254	Gene3D	G3DSA:3.40.50.300	-	26	220	1e-15	IPR027417	P-loop containing nucleoside triphosphate hydrolase
poly_jg1628.t1	254	Pfam	PF01926	50S ribosome-binding GTPase	40	146	2.3e-07	IPR006073	GTP binding domain
poly_jg1628.t1	254	SUPERFAMILY	SSF52540	P-loop containing nucleoside triphosphate hydrolases	31	210	9.11e-18	IPR027417	P-loop containing nucleoside triphosphate hydrolase
poly_jg6167.t1	508	Pfam	PF13639	Ring finger domain	453	497	1.4e-08	IPR001841	Zinc finger, RING-type
poly_jg6167.t1	508	SUPERFAMILY	SSF57850	RING/U-box	454	503	3.89e-11	-	-
poly_jg6167.t1	508	Gene3D	G3DSA:3.30.40.10	Zinc/RING finger domain, C3HC4 (zinc finger)	416	502	5.6e-11	IPR013083	Zinc finger, RING/FYVE/PHD-type
poly_jg10190.t1	193	Pfam	PF00160	Cyclophilin type peptidyl-prolyl cis-trans isomerase/CLD	17	179	2.1e-45	IPR002130	Cyclophilin-type peptidyl-prolyl cis-trans isomerase domain
poly_jg10190.t1	193	SUPERFAMILY	SSF50891	Cyclophilin-like	6	184	3.94e-70	IPR029000	Cyclophilin-like domain superfamily
poly_jg10190.t1	193	Gene3D	G3DSA:2.40.100.10	-	4	185	6e-76	IPR029000	Cyclophilin-like domain superfamily
poly_jg8333.t1	395	Gene3D	G3DSA:3.30.60.10	-	9	54	9.8e-06	IPR036861	Endochitinase-like superfamily
poly_jg2515.t1	618	Pfam	PF13522	Glutamine amidotransferase domain	74	202	4.8e-23	-	-
poly_jg2515.t1	618	Pfam	PF01380	SIS domain	294	421	4e-17	IPR001347	SIS domain
poly_jg2515.t1	618	Pfam	PF01380	SIS domain	473	600	6.2e-22	IPR001347	SIS domain
poly_jg2515.t1	618	Gene3D	G3DSA:3.40.50.10490	-	251	618	1.4e-117	-	-
poly_jg2515.t1	618	SUPERFAMILY	SSF56235	N-terminal nucleophile aminohydrolases (Ntn hydrolases)	1	229	1.37e-62	IPR029055	Nucleophile aminohydrolases, N-terminal
poly_jg2515.t1	618	Gene3D	G3DSA:3.40.50.10490	-	458	603	1.4e-117	-	-
poly_jg2515.t1	618	Gene3D	G3DSA:3.60.20.10	Glutamine Phosphoribosylpyrophosphate, subunit 1, domain 1	1	246	1.9e-71	IPR029055	Nucleophile aminohydrolases, N-terminal
poly_jg2515.t1	618	SUPERFAMILY	SSF53697	SIS domain	250	617	3.34e-77	IPR046348	SIS domain superfamily
poly_jg9274.t1	253	Pfam	PF00314	Thaumatin family	13	237	2e-70	IPR001938	Thaumatin family
poly_jg9274.t1	253	Gene3D	G3DSA:2.60.110.10	Thaumatin	8	237	1.1e-77	IPR037176	Osmotin/thaumatin-like superfamily
poly_jg9274.t1	253	SUPERFAMILY	SSF49870	Osmotin, thaumatin-like protein	9	238	2.35e-65	IPR037176	Osmotin/thaumatin-like superfamily
poly_jg9067.t1	395	Gene3D	G3DSA:3.40.630.30	-	210	374	2.3e-12	-	-
poly_jg9067.t1	395	SUPERFAMILY	SSF55729	Acyl-CoA N-acyltransferases (Nat)	216	371	1.9e-07	IPR016181	Acyl-CoA N-acyltransferase
poly_jg6009.t1	230	Pfam	PF03351	DOMON domain	15	134	8.6e-20	-	-
poly_jg3792.t1	479	Gene3D	G3DSA:2.60.120.740	-	391	479	1.6e-14	IPR043159	D-galactoside/L-rhamnose binding SUEL lectin domain superfamily
poly_jg3792.t1	479	Pfam	PF02140	Galactose binding lectin domain	402	478	4.1e-14	IPR000922	D-galactoside/L-rhamnose binding SUEL lectin domain
poly_jg5091.t1	464	Pfam	PF00069	Protein kinase domain	126	414	1.5e-72	IPR000719	Protein kinase domain
poly_jg5091.t1	464	SUPERFAMILY	SSF56112	Protein kinase-like (PK-like)	120	422	1.04e-98	IPR011009	Protein kinase-like domain superfamily
poly_jg5091.t1	464	Gene3D	G3DSA:1.10.510.10	Transferase(Phosphotransferase) domain 1	212	425	3.9e-146	-	-
poly_jg5091.t1	464	Gene3D	G3DSA:3.30.200.20	Phosphorylase Kinase; domain 1	116	452	3.9e-146	-	-
poly_jg3237.t1	400	SUPERFAMILY	SSF48403	Ankyrin repeat	333	382	1.34e-05	IPR036770	Ankyrin repeat-containing domain superfamily
poly_jg2645.t1	553	Gene3D	G3DSA:3.60.21.10	-	209	552	5.4e-108	IPR029052	Metallo-dependent phosphatase-like
poly_jg2645.t1	553	Pfam	PF00149	Calcineurin-like phosphoesterase	294	493	2e-26	IPR004843	Calcineurin-like phosphoesterase domain, ApaH type
poly_jg2645.t1	553	SUPERFAMILY	SSF56300	Metallo-dependent phosphatases	226	543	7.99e-89	IPR029052	Metallo-dependent phosphatase-like
poly_jg7768.t1	508	SUPERFAMILY	SSF50978	WD40 repeat-like	74	330	5.49e-06	IPR036322	WD40-repeat-containing domain superfamily
poly_jg9565.t1	649	SUPERFAMILY	SSF57850	RING/U-box	580	644	1.06e-05	-	-
poly_jg9565.t1	649	Gene3D	G3DSA:3.30.40.10	Zinc/RING finger domain, C3HC4 (zinc finger)	563	644	6.1e-07	IPR013083	Zinc finger, RING/FYVE/PHD-type
poly_jg5162.t1	581	Gene3D	G3DSA:1.10.1380.10	Neutral endopeptidase , domain2	53	441	1.1e-140	IPR042089	Peptidase M13, domain 2
poly_jg5162.t1	581	Pfam	PF05649	Peptidase family M13	24	399	1.7e-67	IPR008753	Peptidase M13, N-terminal domain
poly_jg5162.t1	581	Gene3D	G3DSA:3.40.390.10	Collagenase (Catalytic Domain)	19	578	1.1e-140	IPR024079	Metallopeptidase, catalytic domain superfamily
poly_jg5162.t1	581	SUPERFAMILY	SSF55486	Metalloproteases ("zincins"), catalytic domain	6	577	2.16e-123	-	-
poly_jg5162.t1	581	Pfam	PF01431	Peptidase family M13	454	577	9.7e-38	IPR018497	Peptidase M13, C-terminal domain
poly_jg1597.t1	138	SUPERFAMILY	SSF51110	alpha-D-mannose-specific plant lectins	13	110	4.15e-09	IPR036426	Bulb-type lectin domain superfamily
poly_jg1597.t1	138	Gene3D	G3DSA:2.90.10.10	-	4	110	1.6e-11	IPR036426	Bulb-type lectin domain superfamily
poly_jg410.t1	529	Pfam	PF01823	MAC/Perforin domain	110	317	4e-22	IPR020864	Membrane attack complex component/perforin (MACPF) domain
poly_jg4617.t1	613	Pfam	PF01823	MAC/Perforin domain	97	296	3.9e-23	IPR020864	Membrane attack complex component/perforin (MACPF) domain
poly_jg7930.t1	389	Pfam	PF00182	Chitinase class I	197	389	5.3e-32	IPR000726	Glycoside hydrolase, family 19, catalytic
poly_jg7930.t1	389	Gene3D	G3DSA:1.10.530.10	-	197	389	7.8e-46	-	-
poly_jg7930.t1	389	Gene3D	G3DSA:3.30.60.10	-	4	44	1.1e-08	IPR036861	Endochitinase-like superfamily
poly_jg7930.t1	389	Gene3D	G3DSA:3.30.60.10	-	155	196	1.4e-08	IPR036861	Endochitinase-like superfamily
poly_jg7930.t1	389	Pfam	PF00187	Chitin recognition protein	6	36	2e-07	IPR001002	Chitin-binding, type 1
poly_jg7930.t1	389	Pfam	PF00187	Chitin recognition protein	157	188	2.2e-06	IPR001002	Chitin-binding, type 1
poly_jg7930.t1	389	SUPERFAMILY	SSF57016	Plant lectins/antimicrobial peptides	4	39	2.75e-08	IPR036861	Endochitinase-like superfamily
poly_jg7930.t1	389	SUPERFAMILY	SSF53955	Lysozyme-like	194	389	8.72e-56	IPR023346	Lysozyme-like domain superfamily
poly_jg7930.t1	389	SUPERFAMILY	SSF57016	Plant lectins/antimicrobial peptides	155	190	8.64e-08	IPR036861	Endochitinase-like superfamily
poly_jg7930.t1	389	Gene3D	G3DSA:3.30.20.10	Endochitinase, domain 2	273	314	1.8e-15	-	-
poly_jg5464.t1	506	SUPERFAMILY	SSF88713	Glycoside hydrolase/deacetylase	163	365	2.63e-47	IPR011330	Glycoside hydrolase/deacetylase, beta/alpha-barrel
poly_jg5464.t1	506	Gene3D	G3DSA:3.20.20.370	Glycoside hydrolase/deacetylase	156	367	4.2e-49	-	-
poly_jg5464.t1	506	Pfam	PF01522	Polysaccharide deacetylase	173	290	1e-27	IPR002509	NodB homology domain
poly_jg3240.t1	425	Gene3D	G3DSA:2.70.130.10	-	87	193	2.7e-09	IPR009011	Mannose-6-phosphate receptor binding domain superfamily
poly_jg3240.t1	425	Gene3D	G3DSA:2.70.130.10	-	210	344	2e-29	IPR009011	Mannose-6-phosphate receptor binding domain superfamily
poly_jg3240.t1	425	Pfam	PF07915	Glucosidase II beta subunit-like protein	91	133	3.3e-08	IPR012913	Protein OS9-like domain
poly_jg3240.t1	425	Pfam	PF07915	Glucosidase II beta subunit-like protein	211	303	5.2e-14	IPR012913	Protein OS9-like domain
poly_jg3240.t1	425	SUPERFAMILY	SSF50911	Mannose 6-phosphate receptor domain	292	348	4.19e-09	IPR009011	Mannose-6-phosphate receptor binding domain superfamily
poly_jg137.t1	184	Gene3D	G3DSA:3.30.60.10	-	2	39	1.5e-10	IPR036861	Endochitinase-like superfamily
poly_jg137.t1	184	SUPERFAMILY	SSF57016	Plant lectins/antimicrobial peptides	2	37	4.84e-09	IPR036861	Endochitinase-like superfamily
poly_jg137.t1	184	Pfam	PF00187	Chitin recognition protein	2	36	1.4e-08	IPR001002	Chitin-binding, type 1
poly_jg137.t1	184	Gene3D	G3DSA:3.30.60.10	-	138	184	5.8e-06	IPR036861	Endochitinase-like superfamily
poly_jg137.t1	184	Gene3D	G3DSA:3.30.60.10	-	64	123	2.5e-08	IPR036861	Endochitinase-like superfamily
poly_jg137.t1	184	SUPERFAMILY	SSF57016	Plant lectins/antimicrobial peptides	81	124	1.24e-06	IPR036861	Endochitinase-like superfamily
poly_jg2464.t1	552	SUPERFAMILY	SSF51445	(Trans)glycosidases	296	533	1.61e-17	IPR017853	Glycoside hydrolase superfamily
poly_jg2464.t1	552	SUPERFAMILY	SSF57016	Plant lectins/antimicrobial peptides	171	212	1.96e-08	IPR036861	Endochitinase-like superfamily
poly_jg2464.t1	552	Pfam	PF00704	Glycosyl hydrolases family 18	329	464	3.8e-07	IPR001223	Glycoside hydrolase family 18, catalytic domain
poly_jg2464.t1	552	Gene3D	G3DSA:3.20.20.80	Glycosidases	265	552	7.8e-74	-	-
poly_jg2464.t1	552	SUPERFAMILY	SSF57016	Plant lectins/antimicrobial peptides	80	118	1.7e-07	IPR036861	Endochitinase-like superfamily
poly_jg2464.t1	552	Pfam	PF00187	Chitin recognition protein	216	251	1.8e-06	IPR001002	Chitin-binding, type 1
poly_jg2464.t1	552	Pfam	PF00187	Chitin recognition protein	6	41	3.5e-09	IPR001002	Chitin-binding, type 1
poly_jg2464.t1	552	Pfam	PF00187	Chitin recognition protein	166	201	8.1e-07	IPR001002	Chitin-binding, type 1
poly_jg2464.t1	552	Gene3D	G3DSA:3.30.60.10	-	5	59	1.1e-11	IPR036861	Endochitinase-like superfamily
poly_jg2464.t1	552	Gene3D	G3DSA:3.30.60.10	-	164	211	4.7e-10	IPR036861	Endochitinase-like superfamily
poly_jg2464.t1	552	Gene3D	G3DSA:3.30.60.10	-	214	262	4.9e-09	IPR036861	Endochitinase-like superfamily
poly_jg2464.t1	552	Gene3D	G3DSA:3.30.60.10	-	75	123	1e-08	IPR036861	Endochitinase-like superfamily
poly_jg2464.t1	552	SUPERFAMILY	SSF57016	Plant lectins/antimicrobial peptides	6	53	2.34e-10	IPR036861	Endochitinase-like superfamily
poly_jg2464.t1	552	SUPERFAMILY	SSF57016	Plant lectins/antimicrobial peptides	215	263	5.51e-08	IPR036861	Endochitinase-like superfamily
poly_jg7440.t1	325	Gene3D	G3DSA:3.30.60.10	-	128	166	5.7e-05	IPR036861	Endochitinase-like superfamily
poly_jg398.t1	467	Gene3D	G3DSA:3.90.70.80	-	295	441	7.4e-35	-	-
poly_jg398.t1	467	Pfam	PF02338	OTU-like cysteine protease	313	411	2.4e-16	IPR003323	OTU domain
poly_jg398.t1	467	SUPERFAMILY	SSF54001	Cysteine proteinases	298	440	2.06e-26	IPR038765	Papain-like cysteine peptidase superfamily
poly_jg4344.t1	314	Gene3D	G3DSA:3.30.60.10	-	30	73	6.7e-05	IPR036861	Endochitinase-like superfamily
poly_jg4344.t1	314	SUPERFAMILY	SSF57016	Plant lectins/antimicrobial peptides	38	61	4.71e-05	IPR036861	Endochitinase-like superfamily
poly_jg5417.t1	169	Pfam	PF00187	Chitin recognition protein	19	55	6.3e-07	IPR001002	Chitin-binding, type 1
poly_jg5417.t1	169	Gene3D	G3DSA:3.30.60.10	-	18	57	1.7e-06	IPR036861	Endochitinase-like superfamily
poly_jg5417.t1	169	SUPERFAMILY	SSF57016	Plant lectins/antimicrobial peptides	27	48	2.75e-05	IPR036861	Endochitinase-like superfamily
poly_jg402.t1	870	Gene3D	G3DSA:3.40.50.2000	Glycogen Phosphorylase B;	82	319	2.1e-84	-	-
poly_jg402.t1	870	Pfam	PF02358	Trehalose-phosphatase	617	808	4.8e-37	IPR003337	Trehalose-phosphatase
poly_jg402.t1	870	SUPERFAMILY	SSF56784	HAD-like	587	800	1.01e-19	IPR036412	HAD-like superfamily
poly_jg402.t1	870	Gene3D	G3DSA:3.40.50.2000	Glycogen Phosphorylase B;	331	540	1.7e-80	-	-
poly_jg402.t1	870	Pfam	PF00982	Glycosyltransferase family 20	95	556	6.7e-163	IPR001830	Glycosyl transferase, family 20
poly_jg402.t1	870	Gene3D	G3DSA:3.30.70.1020	-	677	758	3.6e-13	-	-
poly_jg402.t1	870	Gene3D	G3DSA:3.40.50.1000	-	615	800	3.6e-13	IPR023214	HAD superfamily
poly_jg402.t1	870	SUPERFAMILY	SSF53756	UDP-Glycosyltransferase/glycogen phosphorylase	95	555	3.58e-142	-	-
poly_jg4501.t1	282	Pfam	PF01522	Polysaccharide deacetylase	10	139	5.6e-20	IPR002509	NodB homology domain
poly_jg4501.t1	282	Gene3D	G3DSA:3.20.20.370	Glycoside hydrolase/deacetylase	3	221	8e-39	-	-
poly_jg4501.t1	282	SUPERFAMILY	SSF88713	Glycoside hydrolase/deacetylase	7	217	3.61e-37	IPR011330	Glycoside hydrolase/deacetylase, beta/alpha-barrel
poly_jg5081.t1	363	Pfam	PF09731	Mitochondrial inner membrane protein	82	349	9.3e-43	IPR019133	MICOS complex subunit MIC60
poly_jg7936.t1	293	Pfam	PF03388	Legume-like lectin family	16	246	4.3e-38	IPR005052	Legume-like lectin
poly_jg7936.t1	293	Gene3D	G3DSA:2.60.120.200	-	10	254	1.2e-63	-	-
poly_jg7936.t1	293	SUPERFAMILY	SSF49899	Concanavalin A-like lectins/glucanases	17	248	4.52e-41	IPR013320	Concanavalin A-like lectin/glucanase domain superfamily
poly_jg354.t1	436	Pfam	PF01926	50S ribosome-binding GTPase	54	136	1e-06	IPR006073	GTP binding domain
poly_jg354.t1	436	SUPERFAMILY	SSF52540	P-loop containing nucleoside triphosphate hydrolases	48	250	3.03e-12	IPR027417	P-loop containing nucleoside triphosphate hydrolase
poly_jg354.t1	436	Gene3D	G3DSA:3.40.50.300	-	27	324	1.6e-14	IPR027417	P-loop containing nucleoside triphosphate hydrolase
A0A0H5RE41	402	Pfam	PF00515	Tetratricopeptide repeat	43	74	1.6e-07	IPR001440	Tetratricopeptide repeat 1
A0A0H5RE41	402	Gene3D	G3DSA:1.25.40.10	Tetratricopeptide repeat domain	8	91	3.2e-17	IPR011990	Tetratricopeptide-like helical domain superfamily
A0A0H5RE41	402	Gene3D	G3DSA:2.60.120.650	Cupin	114	361	2.2e-26	-	-
A0A0H5RE41	402	Pfam	PF13621	Cupin-like domain	123	348	1.6e-10	IPR041667	Cupin-like domain 8
A0A0H5RE41	402	SUPERFAMILY	SSF51197	Clavaminate synthase-like	105	379	3.3e-26	-	-
A0A0H5RE41	402	SUPERFAMILY	SSF48452	TPR-like	4	91	2.63e-15	IPR011990	Tetratricopeptide-like helical domain superfamily
A0A0H5QQD8	506	Gene3D	G3DSA:3.40.50.300	-	61	234	5.7e-54	IPR027417	P-loop containing nucleoside triphosphate hydrolase
A0A0H5QQD8	506	Gene3D	G3DSA:3.40.50.300	-	409	506	7.3e-39	IPR027417	P-loop containing nucleoside triphosphate hydrolase
A0A0H5QQD8	506	Pfam	PF17857	AAA+ lid domain	276	364	3.4e-15	IPR041589	Dynein heavy chain 3, AAA+ lid domain
A0A0H5QQD8	506	Gene3D	G3DSA:1.20.920.30	-	238	397	1.2e-34	-	-
A0A0H5QQD8	506	SUPERFAMILY	SSF52540	P-loop containing nucleoside triphosphate hydrolases	429	497	3.84e-09	IPR027417	P-loop containing nucleoside triphosphate hydrolase
A0A0H5QQD8	506	Pfam	PF12775	P-loop containing dynein motor region	57	236	1.2e-71	-	-
A0A0H5QQD8	506	SUPERFAMILY	SSF52540	P-loop containing nucleoside triphosphate hydrolases	79	349	8.4e-22	IPR027417	P-loop containing nucleoside triphosphate hydrolase
A0A0H5QQD8	506	Pfam	PF12780	P-loop containing dynein motor region D4	429	506	1e-30	IPR024317	Dynein heavy chain, AAA module D4
A0A0H5QM30	942	Gene3D	G3DSA:1.20.1270.50	Glycoside hydrolase family 38, central domain	366	422	2e-23	IPR037094	Glycoside hydrolase family 38, central domain superfamily
A0A0H5QM30	942	SUPERFAMILY	SSF88688	Families 57/38 glycoside transferase middle domain	325	421	1.93e-28	IPR028995	Glycoside hydrolase families 57/38, central domain superfamily
A0A0H5QM30	942	Pfam	PF07748	Glycosyl hydrolases family 38 C-terminal domain	542	756	1.3e-42	IPR011682	Glycosyl hydrolase family 38, C-terminal
A0A0H5QM30	942	Gene3D	G3DSA:2.70.98.30	-	539	802	2e-90	-	-
A0A0H5QM30	942	Pfam	PF17677	Glycosyl hydrolases family 38 C-terminal beta sandwich domain	827	927	1.9e-05	IPR041147	Glycosyl hydrolases family 38, C-terminal beta sandwich domain
A0A0H5QM30	942	Pfam	PF01074	Glycosyl hydrolases family 38 N-terminal domain	7	319	4e-84	IPR000602	Glycoside hydrolase family 38, N-terminal domain
A0A0H5QM30	942	Pfam	PF09261	Alpha mannosidase middle domain	327	415	1.5e-20	IPR015341	Glycoside hydrolase family 38, central domain
A0A0H5QM30	942	Gene3D	G3DSA:3.20.110.10	Glycoside hydrolase 38, N terminal domain	6	284	5.8e-110	IPR027291	Glycoside hydrolase 38, N-terminal domain superfamily
A0A0H5QM30	942	SUPERFAMILY	SSF88713	Glycoside hydrolase/deacetylase	6	320	2.36e-92	IPR011330	Glycoside hydrolase/deacetylase, beta/alpha-barrel
A0A0H5QM30	942	Gene3D	G3DSA:1.20.1270.50	Glycoside hydrolase family 38, central domain	285	365	2.2e-27	IPR037094	Glycoside hydrolase family 38, central domain superfamily
A0A0H5QM30	942	SUPERFAMILY	SSF74650	Galactose mutarotase-like	418	931	1.3e-125	IPR011013	Galactose mutarotase-like domain superfamily
A0A0H5QM30	942	Gene3D	G3DSA:2.60.40.1180	-	426	520	1.1e-20	IPR013780	Glycosyl hydrolase, all-beta
A0A0H5QM30	942	Gene3D	G3DSA:2.60.40.1360	-	814	936	2e-31	-	-
A0A0H5REB3	125	Gene3D	G3DSA:2.60.40.420	-	3	121	9.5e-11	IPR008972	Cupredoxin
A0A0H5REB3	125	SUPERFAMILY	SSF49503	Cupredoxins	40	110	1.09e-05	IPR008972	Cupredoxin
A0A0H5R0Z9	470	SUPERFAMILY	SSF48208	Six-hairpin glycosidases	7	451	1.47e-148	IPR008928	Six-hairpin glycosidase superfamily
A0A0H5R0Z9	470	Pfam	PF06824	Metal-independent alpha-mannosidase (GH125)	34	440	7.2e-146	IPR008313	Metal-independent alpha-mannosidase
A0A0H5R0Z9	470	Gene3D	G3DSA:1.50.10.10	-	19	460	9.7e-161	IPR012341	Six-hairpin glycosidase-like superfamily
A0A0H5RRQ3	548	Pfam	PF14008	Iron/zinc purple acid phosphatase-like protein C	476	534	1e-07	IPR025733	Iron/zinc purple acid phosphatase-like C-terminal domain
A0A0H5RRQ3	548	Gene3D	G3DSA:3.60.21.10	-	236	542	6.2e-79	IPR029052	Metallo-dependent phosphatase-like
A0A0H5RRQ3	548	Pfam	PF16656	Purple acid Phosphatase, N-terminal domain	141	231	1.3e-08	IPR015914	Purple acid phosphatase, N-terminal
A0A0H5RRQ3	548	Pfam	PF00149	Calcineurin-like phosphoesterase	241	457	8.9e-17	IPR004843	Calcineurin-like phosphoesterase domain, ApaH type
A0A0H5RRQ3	548	Pfam	PF17808	Fn3-like domain from Purple Acid Phosphatase	33	126	6.8e-19	IPR040974	Purple acid phosphatase, Fn3-like domain
A0A0H5RRQ3	548	SUPERFAMILY	SSF56300	Metallo-dependent phosphatases	241	529	1.02e-45	IPR029052	Metallo-dependent phosphatase-like
A0A0H5RRQ3	548	Gene3D	G3DSA:2.60.40.380	-	136	235	1.2e-07	-	-
A0A0H5RRQ3	548	SUPERFAMILY	SSF49363	Purple acid phosphatase, N-terminal domain	121	234	5.62e-14	IPR008963	Purple acid phosphatase-like, N-terminal
A0A0H5QPG3	381	Pfam	PF04113	Gpi16 subunit, GPI transamidase component	5	364	3.4e-64	IPR007245	GPI transamidase component PIG-T
A0A0H5RH28	99	Gene3D	G3DSA:3.40.33.10	CAP	6	98	9.3e-20	IPR035940	CAP superfamily
A0A0H5RH28	99	Pfam	PF00188	Cysteine-rich secretory protein family	11	98	4.6e-10	IPR014044	CAP domain
A0A0H5RH28	99	SUPERFAMILY	SSF55797	PR-1-like	6	98	2.49e-21	IPR035940	CAP superfamily
A0A0H5QUW1	403	Pfam	PF07691	PA14 domain	133	264	2.9e-28	IPR011658	PA14 domain
A0A0H5QUW1	403	Gene3D	G3DSA:2.60.40.10	Immunoglobulins	8	129	3.3e-06	IPR013783	Immunoglobulin-like fold
A0A0H5QUW1	403	SUPERFAMILY	SSF56988	Anthrax protective antigen	132	268	6.67e-42	-	-
A0A0H5QUW1	403	Gene3D	G3DSA:2.60.40.10	Immunoglobulins	291	397	1.3e-14	IPR013783	Immunoglobulin-like fold
A0A0H5QUW1	403	Gene3D	G3DSA:3.90.182.10	-	130	290	6.2e-31	-	-
A0A0H5QUW1	403	SUPERFAMILY	SSF81296	E set domains	313	393	2.4e-09	IPR014756	Immunoglobulin E-set
A0A0H5RD16	153	Gene3D	G3DSA:2.90.10.10	-	2	131	1.6e-12	IPR036426	Bulb-type lectin domain superfamily
A0A0H5RD16	153	SUPERFAMILY	SSF51110	alpha-D-mannose-specific plant lectins	68	136	1.03e-09	IPR036426	Bulb-type lectin domain superfamily
A0A0H5RDW9	500	Gene3D	G3DSA:2.60.40.420	-	189	343	9.3e-14	IPR008972	Cupredoxin
A0A0H5RDW9	500	SUPERFAMILY	SSF49503	Cupredoxins	41	167	4.54e-16	IPR008972	Cupredoxin
A0A0H5RDW9	500	Gene3D	G3DSA:2.60.40.420	-	11	163	1.3e-26	IPR008972	Cupredoxin
A0A0H5RDW9	500	Pfam	PF07732	Multicopper oxidase	55	166	1.7e-10	IPR011707	Multicopper oxidase, N-terminal
A0A0H5RDW9	500	Gene3D	G3DSA:2.60.40.420	-	348	475	1.1e-15	IPR008972	Cupredoxin
A0A0H5RDW9	500	Pfam	PF07731	Multicopper oxidase	365	466	7.8e-10	IPR011706	Multicopper oxidase, C-terminal
A0A0H5RDW9	500	SUPERFAMILY	SSF49503	Cupredoxins	351	468	5.43e-11	IPR008972	Cupredoxin
A0A0H5RDW9	500	SUPERFAMILY	SSF49503	Cupredoxins	212	468	9.5e-16	IPR008972	Cupredoxin
A0A0H5R4V6	412	Pfam	PF00026	Eukaryotic aspartyl protease	67	380	8.9e-93	IPR033121	Peptidase family A1 domain
A0A0H5R4V6	412	Gene3D	G3DSA:2.40.70.10	Acid Proteases	67	223	3.6e-101	IPR021109	Aspartic peptidase domain superfamily
A0A0H5R4V6	412	Gene3D	G3DSA:2.40.70.10	Acid Proteases	57	378	3.6e-101	IPR021109	Aspartic peptidase domain superfamily
A0A0H5R4V6	412	SUPERFAMILY	SSF50630	Acid proteases	53	380	1.71e-95	IPR021109	Aspartic peptidase domain superfamily
A0A0H5QMT8	197	Gene3D	G3DSA:3.40.33.10	CAP	4	164	7.6e-21	IPR035940	CAP superfamily
A0A0H5QMT8	197	SUPERFAMILY	SSF55797	PR-1-like	6	135	2.35e-23	IPR035940	CAP superfamily
A0A0H5QMT8	197	Pfam	PF00188	Cysteine-rich secretory protein family	10	126	2.2e-10	IPR014044	CAP domain
A0A0H5R710	273	Pfam	PF02140	Galactose binding lectin domain	26	84	2e-08	IPR000922	D-galactoside/L-rhamnose binding SUEL lectin domain
A0A0H5R710	273	Gene3D	G3DSA:2.60.120.740	-	6	88	1.9e-08	IPR043159	D-galactoside/L-rhamnose binding SUEL lectin domain superfamily
A0A0H5REC7	107	SUPERFAMILY	SSF101576	Supernatant protein factor (SPF), C-terminal domain	11	98	1.31e-13	IPR036598	GOLD domain superfamily
A0A0H5REC7	107	Pfam	PF01105	emp24/gp25L/p24 family/GOLD	2	107	2.2e-13	IPR009038	GOLD domain
A0A0H5RK69	184	SUPERFAMILY	SSF57016	Plant lectins/antimicrobial peptides	146	183	3.4e-05	IPR036861	Endochitinase-like superfamily
A0A0H5RK69	184	Gene3D	G3DSA:3.30.60.10	-	67	129	8.4e-06	IPR036861	Endochitinase-like superfamily
A0A0H5RK69	184	Gene3D	G3DSA:3.30.60.10	-	1	44	4.6e-10	IPR036861	Endochitinase-like superfamily
A0A0H5RK69	184	Gene3D	G3DSA:3.30.60.10	-	142	181	1.5e-07	IPR036861	Endochitinase-like superfamily
A0A0H5RK69	184	SUPERFAMILY	SSF57016	Plant lectins/antimicrobial peptides	82	126	8.9e-05	IPR036861	Endochitinase-like superfamily
A0A0H5RK69	184	Pfam	PF00187	Chitin recognition protein	2	39	2.9e-08	IPR001002	Chitin-binding, type 1
A0A0H5RK69	184	SUPERFAMILY	SSF57016	Plant lectins/antimicrobial peptides	2	40	4.58e-08	IPR036861	Endochitinase-like superfamily
A0A0H5QND1	437	Pfam	PF12999	Glucosidase II beta subunit-like	12	149	8.2e-37	IPR028146	Glucosidase II beta subunit, N-terminal
A0A0H5QND1	437	Gene3D	G3DSA:2.70.130.10	-	315	413	6.6e-28	IPR009011	Mannose-6-phosphate receptor binding domain superfamily
A0A0H5QND1	437	Pfam	PF13015	Glucosidase II beta subunit-like protein	281	418	1.1e-28	IPR036607	Glucosidase 2 subunit beta-like
A0A0H5QND1	437	SUPERFAMILY	SSF50911	Mannose 6-phosphate receptor domain	323	412	5.1e-14	IPR009011	Mannose-6-phosphate receptor binding domain superfamily
A0A0H5R3V9	559	Pfam	PF07773	Tectonic domain DUF1619	28	351	9.9e-44	IPR011677	Tectonic domain
A0A0H5RKJ1	236	Pfam	PF01522	Polysaccharide deacetylase	13	129	1.5e-15	IPR002509	NodB homology domain
A0A0H5RKJ1	236	SUPERFAMILY	SSF88713	Glycoside hydrolase/deacetylase	11	216	2.78e-42	IPR011330	Glycoside hydrolase/deacetylase, beta/alpha-barrel
A0A0H5RKJ1	236	Gene3D	G3DSA:3.20.20.370	Glycoside hydrolase/deacetylase	3	220	5.1e-42	-	-
A0A0H5R9A7	114	Pfam	PF12796	Ankyrin repeats (3 copies)	20	102	2e-08	IPR002110	Ankyrin repeat
A0A0H5R9A7	114	Gene3D	G3DSA:1.25.40.20	-	4	114	2e-18	IPR036770	Ankyrin repeat-containing domain superfamily
A0A0H5R9A7	114	SUPERFAMILY	SSF48403	Ankyrin repeat	9	114	8.39e-19	IPR036770	Ankyrin repeat-containing domain superfamily
A0A0H5QPI7	466	Pfam	PF13015	Glucosidase II beta subunit-like protein	310	447	1.2e-28	IPR036607	Glucosidase 2 subunit beta-like
A0A0H5QPI7	466	Pfam	PF12999	Glucosidase II beta subunit-like	12	149	9.3e-37	IPR028146	Glucosidase II beta subunit, N-terminal
A0A0H5QPI7	466	Gene3D	G3DSA:2.70.130.10	-	344	442	7.3e-28	IPR009011	Mannose-6-phosphate receptor binding domain superfamily
A0A0H5QPI7	466	SUPERFAMILY	SSF50911	Mannose 6-phosphate receptor domain	352	441	2.35e-13	IPR009011	Mannose-6-phosphate receptor binding domain superfamily
A0A0H5R7U6	578	Gene3D	G3DSA:2.170.210.20	-	19	208	4.6e-41	IPR038558	SAS-6, N-terminal domain superfamily
A0A0H5R7U6	578	Pfam	PF16531	Centriolar protein SAS N-terminal	62	156	6.8e-23	IPR032396	Spindle assembly abnormal protein 6, N-terminal
A0A0H5R403	460	Pfam	PF12796	Ankyrin repeats (3 copies)	226	299	2.6e-07	IPR002110	Ankyrin repeat
A0A0H5R403	460	Pfam	PF12796	Ankyrin repeats (3 copies)	318	412	3.2e-08	IPR002110	Ankyrin repeat
A0A0H5R403	460	SUPERFAMILY	SSF48403	Ankyrin repeat	148	435	7.32e-53	IPR036770	Ankyrin repeat-containing domain superfamily
A0A0H5R403	460	Gene3D	G3DSA:1.25.40.20	-	109	357	2.9e-48	IPR036770	Ankyrin repeat-containing domain superfamily
A0A0H5R403	460	Gene3D	G3DSA:1.25.40.20	-	358	437	5e-11	IPR036770	Ankyrin repeat-containing domain superfamily
A0A0H5R403	460	Pfam	PF13857	Ankyrin repeats (many copies)	148	198	1.6e-07	IPR002110	Ankyrin repeat
A0A0H5RSY0	183	Pfam	PF08939	Domain of unknown function (DUF1917)	64	167	2e-21	IPR015034	Basophilic leukemia-expressed protein Bles03-like
A0A0H5RSY0	183	Gene3D	G3DSA:3.30.760.10	RNA Cap, Translation Initiation Factor Eif4e	1	183	7.2e-50	IPR023398	Translation Initiation factor eIF- 4e-like
A0A0H5RSY0	183	SUPERFAMILY	SSF55418	eIF4e-like	14	181	7.85e-27	IPR023398	Translation Initiation factor eIF- 4e-like
A0A0H5R9A5	199	Gene3D	G3DSA:1.25.40.20	-	17	195	5.6e-21	IPR036770	Ankyrin repeat-containing domain superfamily
A0A0H5R9A5	199	Pfam	PF12796	Ankyrin repeats (3 copies)	71	174	2.1e-10	IPR002110	Ankyrin repeat
A0A0H5R9A5	199	SUPERFAMILY	SSF48403	Ankyrin repeat	72	188	1.04e-18	IPR036770	Ankyrin repeat-containing domain superfamily
A0A0H5QQF2	135	Pfam	PF18483	Bacterial lectin	20	127	1.7e-08	-	-
A0A0H5QQF2	135	SUPERFAMILY	SSF49899	Concanavalin A-like lectins/glucanases	26	128	5.79e-14	IPR013320	Concanavalin A-like lectin/glucanase domain superfamily
A0A0H5QQF2	135	Gene3D	G3DSA:2.60.120.200	-	7	130	1.3e-16	-	-
A0A0H5QGH7	317	Pfam	PF12796	Ankyrin repeats (3 copies)	34	81	6.4e-08	IPR002110	Ankyrin repeat
A0A0H5QGH7	317	Pfam	PF12796	Ankyrin repeats (3 copies)	239	316	4e-08	IPR002110	Ankyrin repeat
A0A0H5QGH7	317	SUPERFAMILY	SSF48403	Ankyrin repeat	14	316	2.99e-39	IPR036770	Ankyrin repeat-containing domain superfamily
A0A0H5QGH7	317	Pfam	PF00023	Ankyrin repeat	136	151	0.028	IPR002110	Ankyrin repeat
A0A0H5QGH7	317	Gene3D	G3DSA:1.25.40.20	-	186	317	9.8e-22	IPR036770	Ankyrin repeat-containing domain superfamily
A0A0H5QGH7	317	Gene3D	G3DSA:1.25.40.20	-	7	184	2.1e-24	IPR036770	Ankyrin repeat-containing domain superfamily
A0A0H5QNA9	180	Pfam	PF04113	Gpi16 subunit, GPI transamidase component	5	168	4.7e-38	IPR007245	GPI transamidase component PIG-T
A0A0H5RDG2	311	Pfam	PF00014	Kunitz/Bovine pancreatic trypsin inhibitor domain	237	283	1.2e-11	IPR002223	Pancreatic trypsin inhibitor Kunitz domain
A0A0H5RDG2	311	Gene3D	G3DSA:4.10.410.10	Pancreatic trypsin inhibitor Kunitz domain	228	291	6.2e-14	IPR036880	Pancreatic trypsin inhibitor Kunitz domain superfamily
A0A0H5RDG2	311	SUPERFAMILY	SSF57362	BPTI-like	230	285	7.09e-13	IPR036880	Pancreatic trypsin inhibitor Kunitz domain superfamily
A0A0H5R836	125	Pfam	PF02014	Reeler domain	37	125	2e-09	IPR002861	Reeler domain
A0A0H5R836	125	Gene3D	G3DSA:2.60.40.4060	Reeler domain	7	125	7.7e-08	IPR042307	Reeler domain superfamily
A0A0H5QQM1	493	Gene3D	G3DSA:3.40.30.10	Glutaredoxin	217	334	1.5e-24	-	-
A0A0H5QQM1	493	SUPERFAMILY	SSF52833	Thioredoxin-like	215	343	4.88e-20	IPR036249	Thioredoxin-like superfamily
A0A0H5QQM1	493	Gene3D	G3DSA:3.40.30.10	Glutaredoxin	335	465	2.8e-23	-	-
A0A0H5QQM1	493	Gene3D	G3DSA:3.40.30.10	Glutaredoxin	1	113	4.3e-13	-	-
A0A0H5QQM1	493	Gene3D	G3DSA:3.40.30.10	Glutaredoxin	114	216	4.9e-07	-	-
A0A0H5QQM1	493	Pfam	PF00085	Thioredoxin	5	107	6.6e-08	IPR013766	Thioredoxin domain
A0A0H5QQM1	493	Pfam	PF00085	Thioredoxin	348	445	4.2e-12	IPR013766	Thioredoxin domain
A0A0H5QQM1	493	SUPERFAMILY	SSF52833	Thioredoxin-like	5	112	7.8e-13	IPR036249	Thioredoxin-like superfamily
A0A0H5QQM1	493	SUPERFAMILY	SSF52833	Thioredoxin-like	345	449	7.4e-19	IPR036249	Thioredoxin-like superfamily
A0A0H5QQM1	493	Pfam	PF13848	Thioredoxin-like domain	141	320	5.8e-18	-	-
A0A0H5RPD9	319	SUPERFAMILY	SSF57850	RING/U-box	264	316	4.86e-11	-	-
A0A0H5RPD9	319	Gene3D	G3DSA:3.30.40.10	Zinc/RING finger domain, C3HC4 (zinc finger)	259	317	6.5e-07	IPR013083	Zinc finger, RING/FYVE/PHD-type
A0A0H5RPD9	319	Pfam	PF04757	Pex2 / Pex12 amino terminal region	15	230	2.4e-41	IPR006845	Pex, N-terminal
A0A0H5QGK1	311	Gene3D	G3DSA:3.40.525.10	-	40	305	4.2e-11	IPR036865	CRAL-TRIO lipid binding domain superfamily
A0A0H5QGK1	311	SUPERFAMILY	SSF46938	CRAL/TRIO N-terminal domain	47	117	1.26e-06	IPR036273	CRAL/TRIO, N-terminal domain superfamily
A0A0H5QW20	270	Gene3D	G3DSA:1.25.40.20	-	5	84	4.4e-10	IPR036770	Ankyrin repeat-containing domain superfamily
A0A0H5QW20	270	SUPERFAMILY	SSF48403	Ankyrin repeat	8	262	2.98e-33	IPR036770	Ankyrin repeat-containing domain superfamily
A0A0H5QW20	270	Gene3D	G3DSA:1.25.40.20	-	92	267	2.8e-27	IPR036770	Ankyrin repeat-containing domain superfamily
A0A0H5QW20	270	Pfam	PF12796	Ankyrin repeats (3 copies)	206	262	2.1e-07	IPR002110	Ankyrin repeat
A0A0H5QW20	270	Pfam	PF13606	Ankyrin repeat	14	42	0.0018	IPR002110	Ankyrin repeat
A0A0H5QRR4	238	Pfam	PF00094	von Willebrand factor type D domain	4	150	3e-05	IPR001846	von Willebrand factor, type D domain
A0A0H5RBS7	309	Gene3D	G3DSA:1.25.40.20	-	92	297	1.4e-27	IPR036770	Ankyrin repeat-containing domain superfamily
A0A0H5RBS7	309	Gene3D	G3DSA:1.25.40.20	-	5	84	5.6e-10	IPR036770	Ankyrin repeat-containing domain superfamily
A0A0H5RBS7	309	Pfam	PF13606	Ankyrin repeat	14	42	0.0022	IPR002110	Ankyrin repeat
A0A0H5RBS7	309	SUPERFAMILY	SSF48403	Ankyrin repeat	14	273	6.1e-31	IPR036770	Ankyrin repeat-containing domain superfamily
A0A0H5RBS7	309	Pfam	PF12796	Ankyrin repeats (3 copies)	214	284	2.5e-08	IPR002110	Ankyrin repeat
A0A0H5QKE8	137	Gene3D	G3DSA:3.30.70.80	Peptidase S8 propeptide/proteinase inhibitor I9	16	114	2.7e-05	IPR037045	Peptidase S8 propeptide/proteinase inhibitor I9 superfamily
A0A0H5RU12	199	Gene3D	G3DSA:1.25.40.20	-	15	197	8.9e-17	IPR036770	Ankyrin repeat-containing domain superfamily
A0A0H5RU12	199	SUPERFAMILY	SSF48403	Ankyrin repeat	28	166	2.36e-13	IPR036770	Ankyrin repeat-containing domain superfamily
A0A0H5QSM4	350	Gene3D	G3DSA:2.60.120.200	-	4	348	2.5e-70	-	-
A0A0H5QSM4	350	Pfam	PF00722	Glycosyl hydrolases family 16	109	230	1.3e-16	IPR000757	Glycoside hydrolase family 16
A0A0H5QSM4	350	SUPERFAMILY	SSF49899	Concanavalin A-like lectins/glucanases	4	336	5.72e-65	IPR013320	Concanavalin A-like lectin/glucanase domain superfamily
A0A0H5RS28	257	SUPERFAMILY	SSF50685	Barwin-like endoglucanases	12	118	1.95e-08	IPR036908	RlpA-like domain superfamily
A0A0H5RGR7	171	SUPERFAMILY	SSF48403	Ankyrin repeat	54	171	9.33e-28	IPR036770	Ankyrin repeat-containing domain superfamily
A0A0H5RGR7	171	Gene3D	G3DSA:1.25.40.20	-	3	171	1.2e-29	IPR036770	Ankyrin repeat-containing domain superfamily
A0A0H5RGR7	171	Pfam	PF12796	Ankyrin repeats (3 copies)	57	118	4.1e-08	IPR002110	Ankyrin repeat
A0A0H5RGR7	171	Pfam	PF13857	Ankyrin repeats (many copies)	119	171	2.1e-08	IPR002110	Ankyrin repeat
A0A0H5REC0	92	Gene3D	G3DSA:3.90.280.10	-	4	92	1e-12	IPR036610	PEBP-like superfamily
A0A0H5REC0	92	SUPERFAMILY	SSF49777	PEBP-like	13	86	7.59e-08	IPR036610	PEBP-like superfamily
A0A0H5QYD2	459	Gene3D	G3DSA:1.25.40.20	-	301	446	1.4e-25	IPR036770	Ankyrin repeat-containing domain superfamily
A0A0H5QYD2	459	Gene3D	G3DSA:1.25.40.20	-	52	192	8e-18	IPR036770	Ankyrin repeat-containing domain superfamily
A0A0H5QYD2	459	SUPERFAMILY	SSF48403	Ankyrin repeat	86	430	1.46e-41	IPR036770	Ankyrin repeat-containing domain superfamily
A0A0H5QYD2	459	Pfam	PF00023	Ankyrin repeat	97	117	0.013	IPR002110	Ankyrin repeat
A0A0H5QYD2	459	Gene3D	G3DSA:1.25.40.20	-	223	294	3e-08	IPR036770	Ankyrin repeat-containing domain superfamily
A0A0H5QYD2	459	Pfam	PF12796	Ankyrin repeats (3 copies)	337	415	1.7e-10	IPR002110	Ankyrin repeat
A0A0H5QYD2	459	Pfam	PF12796	Ankyrin repeats (3 copies)	138	188	3.6e-06	IPR002110	Ankyrin repeat
A0A0H5QI48	226	Pfam	PF12796	Ankyrin repeats (3 copies)	105	192	7.4e-09	IPR002110	Ankyrin repeat
A0A0H5QI48	226	Gene3D	G3DSA:1.25.40.20	-	3	223	1.9e-21	IPR036770	Ankyrin repeat-containing domain superfamily
A0A0H5QI48	226	SUPERFAMILY	SSF48403	Ankyrin repeat	97	209	3.22e-18	IPR036770	Ankyrin repeat-containing domain superfamily
A0A0H5R3X7	315	SUPERFAMILY	SSF88713	Glycoside hydrolase/deacetylase	93	294	5.44e-24	IPR011330	Glycoside hydrolase/deacetylase, beta/alpha-barrel
A0A0H5R3X7	315	Pfam	PF01522	Polysaccharide deacetylase	98	219	7e-13	IPR002509	NodB homology domain
A0A0H5R3X7	315	Pfam	PF00187	Chitin recognition protein	12	43	6.9e-08	IPR001002	Chitin-binding, type 1
A0A0H5R3X7	315	SUPERFAMILY	SSF57016	Plant lectins/antimicrobial peptides	10	44	1.31e-08	IPR036861	Endochitinase-like superfamily
A0A0H5R3X7	315	Gene3D	G3DSA:3.30.60.10	-	9	54	4.3e-11	IPR036861	Endochitinase-like superfamily
A0A0H5R3X7	315	Gene3D	G3DSA:3.20.20.370	Glycoside hydrolase/deacetylase	89	296	1.1e-20	-	-
A0A0H5QL21	643	SUPERFAMILY	SSF50729	PH domain-like	12	151	3.32e-05	-	-
A0A0H5QL21	643	Gene3D	G3DSA:2.130.10.30	-	155	421	1e-53	IPR009091	Regulator of chromosome condensation 1/beta-lactamase-inhibitor protein II
A0A0H5QL21	643	SUPERFAMILY	SSF50985	RCC1/BLIP-II	441	575	3.66e-18	IPR009091	Regulator of chromosome condensation 1/beta-lactamase-inhibitor protein II
A0A0H5QL21	643	Pfam	PF00415	Regulator of chromosome condensation (RCC1) repeat	470	519	2.6e-10	IPR000408	Regulator of chromosome condensation, RCC1
A0A0H5QL21	643	Pfam	PF00415	Regulator of chromosome condensation (RCC1) repeat	189	236	3.2e-08	IPR000408	Regulator of chromosome condensation, RCC1
A0A0H5QL21	643	Pfam	PF00415	Regulator of chromosome condensation (RCC1) repeat	392	459	1.7e-10	IPR000408	Regulator of chromosome condensation, RCC1
A0A0H5QL21	643	Pfam	PF00415	Regulator of chromosome condensation (RCC1) repeat	289	334	6.4e-10	IPR000408	Regulator of chromosome condensation, RCC1
A0A0H5QL21	643	SUPERFAMILY	SSF50985	RCC1/BLIP-II	189	419	4.71e-52	IPR009091	Regulator of chromosome condensation 1/beta-lactamase-inhibitor protein II
A0A0H5QL21	643	Gene3D	G3DSA:2.130.10.30	-	425	583	7.3e-25	IPR009091	Regulator of chromosome condensation 1/beta-lactamase-inhibitor protein II
A0A0H5QL21	643	Pfam	PF01363	FYVE zinc finger	578	642	1.1e-17	IPR000306	FYVE zinc finger
A0A0H5QL21	643	Gene3D	G3DSA:3.30.40.10	Zinc/RING finger domain, C3HC4 (zinc finger)	584	643	1.7e-17	IPR013083	Zinc finger, RING/FYVE/PHD-type
A0A0H5QL21	643	Gene3D	G3DSA:2.30.29.30	-	9	154	6.2e-13	IPR011993	PH-like domain superfamily
A0A0H5QL21	643	SUPERFAMILY	SSF57903	FYVE/PHD zinc finger	578	642	1.34e-18	IPR011011	Zinc finger, FYVE/PHD-type
A0A0H5QNZ4	111	SUPERFAMILY	SSF49503	Cupredoxins	16	110	7.03e-09	IPR008972	Cupredoxin
A0A0H5QNZ4	111	Gene3D	G3DSA:2.60.40.420	-	19	111	8.4e-08	IPR008972	Cupredoxin
A0A0H5R0E8	201	Pfam	PF00023	Ankyrin repeat	153	181	0.014	IPR002110	Ankyrin repeat
A0A0H5R0E8	201	Gene3D	G3DSA:1.25.40.20	-	22	199	6.2e-20	IPR036770	Ankyrin repeat-containing domain superfamily
A0A0H5R0E8	201	SUPERFAMILY	SSF48403	Ankyrin repeat	75	196	1.37e-17	IPR036770	Ankyrin repeat-containing domain superfamily
A0A0H5RUG6	92	Gene3D	G3DSA:2.130.10.10	-	1	88	2.8e-05	IPR015943	WD40/YVTN repeat-like-containing domain superfamily
A0A0H5RUG6	92	SUPERFAMILY	SSF69322	Tricorn protease domain 2	2	74	2.62e-07	-	-
A0A0H5RJF9	211	Gene3D	G3DSA:1.25.40.20	-	17	211	2.6e-21	IPR036770	Ankyrin repeat-containing domain superfamily
A0A0H5RJF9	211	Pfam	PF12796	Ankyrin repeats (3 copies)	71	174	2.5e-10	IPR002110	Ankyrin repeat
A0A0H5RJF9	211	SUPERFAMILY	SSF48403	Ankyrin repeat	72	189	1.07e-18	IPR036770	Ankyrin repeat-containing domain superfamily
A0A0H5QI92	873	Gene3D	G3DSA:2.60.40.1760	glycosyl hydrolase (family 31)	23	316	4.8e-27	-	-
A0A0H5QI92	873	Gene3D	G3DSA:2.60.40.1180	-	740	873	6.1e-20	IPR013780	Glycosyl hydrolase, all-beta
A0A0H5QI92	873	SUPERFAMILY	SSF51011	Glycosyl hydrolase domain	656	738	3.52e-18	-	-
A0A0H5QI92	873	SUPERFAMILY	SSF51445	(Trans)glycosidases	307	655	9.27e-78	IPR017853	Glycoside hydrolase superfamily
A0A0H5QI92	873	Pfam	PF01055	Glycosyl hydrolases family 31	297	743	3.7e-134	IPR000322	Glycoside hydrolase family 31
A0A0H5QI92	873	Gene3D	G3DSA:2.60.40.1180	-	665	739	6.8e-18	IPR013780	Glycosyl hydrolase, all-beta
A0A0H5QI92	873	SUPERFAMILY	SSF74650	Galactose mutarotase-like	13	299	1.04e-11	IPR011013	Galactose mutarotase-like domain superfamily
A0A0H5QI92	873	Pfam	PF13802	Galactose mutarotase-like	199	274	1.8e-15	IPR025887	Glycoside hydrolase family 31, N-terminal domain
A0A0H5QI92	873	Gene3D	G3DSA:3.20.20.80	Glycosidases	493	664	8.1e-68	-	-
A0A0H5QI92	873	Gene3D	G3DSA:3.20.20.80	Glycosidases	318	492	1.6e-52	-	-
A0A0H5QIA8	151	Gene3D	G3DSA:3.30.60.10	-	71	113	1.4e-12	IPR036861	Endochitinase-like superfamily
A0A0H5QIA8	151	SUPERFAMILY	SSF57016	Plant lectins/antimicrobial peptides	71	108	1.28e-10	IPR036861	Endochitinase-like superfamily
A0A0H5QIA8	151	Pfam	PF00187	Chitin recognition protein	73	107	1.2e-11	IPR001002	Chitin-binding, type 1
A0A0H5QZT7	852	Gene3D	G3DSA:3.30.420.40	-	183	374	4.5e-96	-	-
A0A0H5QZT7	852	Gene3D	G3DSA:3.30.420.40	-	7	389	4.5e-96	-	-
A0A0H5QZT7	852	SUPERFAMILY	SSF100934	Heat shock protein 70kD (HSP70), C-terminal subdomain	607	689	2.16e-09	IPR029048	Heat shock protein 70kD, C-terminal domain superfamily
A0A0H5QZT7	852	Gene3D	G3DSA:1.20.1270.10	-	581	692	2.3e-14	IPR029048	Heat shock protein 70kD, C-terminal domain superfamily
A0A0H5QZT7	852	SUPERFAMILY	SSF53067	Actin-like ATPase domain	190	392	3.4e-36	IPR043129	ATPase, nucleotide binding domain
A0A0H5QZT7	852	Gene3D	G3DSA:3.90.640.10	Actin; Chain A, domain 4	238	326	4.5e-96	-	-
A0A0H5QZT7	852	SUPERFAMILY	SSF53067	Actin-like ATPase domain	6	182	2.37e-30	IPR043129	ATPase, nucleotide binding domain
A0A0H5QZT7	852	Gene3D	G3DSA:2.60.34.10	Substrate Binding Domain Of DNAk; Chain A, domain 1	399	550	1.4e-16	IPR029047	Heat shock protein 70kD, peptide-binding domain superfamily
A0A0H5QZT7	852	Pfam	PF00012	Hsp70 protein	15	681	2.4e-85	IPR013126	Heat shock protein 70 family
A0A0H5QZT7	852	Gene3D	G3DSA:3.30.30.30	-	39	111	4.5e-96	-	-
A0A0H5R1P3	172	Gene3D	G3DSA:1.25.40.20	-	1	172	9.4e-29	IPR036770	Ankyrin repeat-containing domain superfamily
A0A0H5R1P3	172	Pfam	PF12796	Ankyrin repeats (3 copies)	57	119	1.2e-06	IPR002110	Ankyrin repeat
A0A0H5R1P3	172	SUPERFAMILY	SSF48403	Ankyrin repeat	54	172	1.23e-25	IPR036770	Ankyrin repeat-containing domain superfamily
A0A0H5R1P3	172	Pfam	PF13857	Ankyrin repeats (many copies)	120	172	2.1e-08	IPR002110	Ankyrin repeat
A0A0H5RFL4	149	Gene3D	G3DSA:1.10.530.10	-	99	149	3e-07	-	-
A0A0H5QQZ5	460	SUPERFAMILY	SSF88713	Glycoside hydrolase/deacetylase	153	370	5.12e-47	IPR011330	Glycoside hydrolase/deacetylase, beta/alpha-barrel
A0A0H5QQZ5	460	Pfam	PF01522	Polysaccharide deacetylase	178	294	3.9e-28	IPR002509	NodB homology domain
A0A0H5QQZ5	460	Gene3D	G3DSA:3.20.20.370	Glycoside hydrolase/deacetylase	150	371	3.6e-50	-	-
A0A0H5R9L7	341	Gene3D	G3DSA:3.30.60.10	-	21	64	2.4e-05	IPR036861	Endochitinase-like superfamily
A0A0H5R9L7	341	SUPERFAMILY	SSF57016	Plant lectins/antimicrobial peptides	158	192	1.44e-06	IPR036861	Endochitinase-like superfamily
A0A0H5R9L7	341	Gene3D	G3DSA:3.30.60.10	-	158	197	1.3e-07	IPR036861	Endochitinase-like superfamily
A0A0H5R9L7	341	Gene3D	G3DSA:3.30.60.10	-	287	327	9.5e-08	IPR036861	Endochitinase-like superfamily
A0A0H5R9L7	341	Pfam	PF00187	Chitin recognition protein	159	193	2.3e-06	IPR001002	Chitin-binding, type 1
A0A0H5R9L7	341	SUPERFAMILY	SSF57016	Plant lectins/antimicrobial peptides	287	321	1.07e-06	IPR036861	Endochitinase-like superfamily
A0A0H5QHW1	244	Gene3D	G3DSA:1.25.40.20	-	27	172	1.1e-05	IPR036770	Ankyrin repeat-containing domain superfamily
A0A0H5QHW1	244	SUPERFAMILY	SSF48403	Ankyrin repeat	98	156	4.97e-05	IPR036770	Ankyrin repeat-containing domain superfamily
A0A0H5QN76	704	Gene3D	G3DSA:3.20.20.300	-	19	334	4.8e-92	IPR036962	Glycoside hydrolase, family 3, N-terminal domain superfamily
A0A0H5QN76	704	Pfam	PF01915	Glycosyl hydrolase family 3 C-terminal domain	357	583	5.8e-48	IPR002772	Glycoside hydrolase family 3 C-terminal domain
A0A0H5QN76	704	Pfam	PF00933	Glycosyl hydrolase family 3 N terminal domain	69	316	6.9e-44	IPR001764	Glycoside hydrolase, family 3, N-terminal
A0A0H5QN76	704	SUPERFAMILY	SSF51445	(Trans)glycosidases	12	356	5.69e-87	IPR017853	Glycoside hydrolase superfamily
A0A0H5QN76	704	SUPERFAMILY	SSF52279	Beta-D-glucan exohydrolase, C-terminal domain	357	586	2.88e-45	IPR036881	Glycoside hydrolase family 3 C-terminal domain superfamily
A0A0H5QN76	704	Gene3D	G3DSA:3.40.50.1700	-	342	584	5e-60	IPR036881	Glycoside hydrolase family 3 C-terminal domain superfamily
A0A0H5QN76	704	Gene3D	G3DSA:2.60.40.10	Immunoglobulins	585	702	4.3e-10	IPR013783	Immunoglobulin-like fold
A0A0H5QZL6	314	Gene3D	G3DSA:1.25.40.20	-	28	135	1.4e-11	IPR036770	Ankyrin repeat-containing domain superfamily
A0A0H5QZL6	314	SUPERFAMILY	SSF48403	Ankyrin repeat	7	281	4.01e-33	IPR036770	Ankyrin repeat-containing domain superfamily
A0A0H5QZL6	314	Pfam	PF13606	Ankyrin repeat	243	270	0.0024	IPR002110	Ankyrin repeat
A0A0H5QZL6	314	Gene3D	G3DSA:1.25.40.20	-	136	185	4.8e-13	IPR036770	Ankyrin repeat-containing domain superfamily
A0A0H5QZL6	314	Gene3D	G3DSA:1.25.40.20	-	194	314	5.6e-09	IPR036770	Ankyrin repeat-containing domain superfamily
A0A0H5QZL6	314	Pfam	PF12796	Ankyrin repeats (3 copies)	56	160	1.4e-11	IPR002110	Ankyrin repeat
A0A0H5QZL6	314	Pfam	PF00023	Ankyrin repeat	165	186	0.01	IPR002110	Ankyrin repeat
A0A0H5R1K9	131	Gene3D	G3DSA:1.10.287.2900	-	13	84	8.9e-12	-	-
A0A0H5R1N6	193	Gene3D	G3DSA:1.10.287.2900	-	14	83	6e-09	-	-
A0A0H5QUF5	511	Pfam	PF07382	Histone H1-like nucleoprotein HC2	393	509	1.6e-10	IPR009970	Histone H1-like nucleoprotein HC2
A0A0H5QUF5	511	Gene3D	G3DSA:3.10.50.10	-	285	345	2.5e-05	IPR029070	Chitinase insertion domain superfamily
A0A0H5QUF5	511	SUPERFAMILY	SSF51445	(Trans)glycosidases	10	377	3.9e-60	IPR017853	Glycoside hydrolase superfamily
A0A0H5QUF5	511	Gene3D	G3DSA:3.20.20.80	Glycosidases	7	284	3.7e-64	-	-
A0A0H5QUF5	511	Pfam	PF00704	Glycosyl hydrolases family 18	22	366	4e-49	IPR001223	Glycoside hydrolase family 18, catalytic domain
A0A0H5QQ38	229	Gene3D	G3DSA:3.30.60.10	-	44	74	8.2e-06	IPR036861	Endochitinase-like superfamily
A0A0H5QHZ4	132	Gene3D	G3DSA:2.60.120.740	-	4	94	2.8e-09	IPR043159	D-galactoside/L-rhamnose binding SUEL lectin domain superfamily
A0A0H5RTF5	159	SUPERFAMILY	SSF47473	EF-hand	34	96	4.18e-05	IPR011992	EF-hand domain pair
A0A0H5R5Q7	159	SUPERFAMILY	SSF47473	EF-hand	34	96	4.18e-05	IPR011992	EF-hand domain pair
A0A0H5QXZ2	190	Gene3D	G3DSA:1.25.40.20	-	48	156	8e-16	IPR036770	Ankyrin repeat-containing domain superfamily
A0A0H5QXZ2	190	SUPERFAMILY	SSF48403	Ankyrin repeat	65	190	1.06e-24	IPR036770	Ankyrin repeat-containing domain superfamily
A0A0H5QXZ2	190	Pfam	PF13637	Ankyrin repeats (many copies)	79	119	3.1e-05	IPR002110	Ankyrin repeat
A0A0H5QXZ2	190	Gene3D	G3DSA:1.25.40.20	-	157	190	1.5e-07	IPR036770	Ankyrin repeat-containing domain superfamily
A0A0H5RF55	154	Pfam	PF03081	Exo70 exocyst complex subunit	13	135	1.3e-05	IPR046364	Exocyst complex subunit Exo70, C-terminal
A0A0H5RF55	154	Gene3D	G3DSA:1.20.1280.170	Exocyst complex component Exo70	11	148	7.8e-06	-	-
A0A0H5R5E3	189	Gene3D	G3DSA:3.30.60.10	-	43	72	2.1e-05	IPR036861	Endochitinase-like superfamily
A0A0H5R5E3	189	SUPERFAMILY	SSF57016	Plant lectins/antimicrobial peptides	53	69	6.28e-05	IPR036861	Endochitinase-like superfamily
A0A0H5R2S4	473	Gene3D	G3DSA:1.20.120.980	Serine carboxypeptidase S28, SKS domain	189	351	2e-141	IPR042269	Serine carboxypeptidase S28, SKS domain
A0A0H5R2S4	473	Pfam	PF05577	Serine carboxypeptidase S28	37	442	1.6e-78	IPR008758	Peptidase S28
A0A0H5R2S4	473	SUPERFAMILY	SSF53474	alpha/beta-Hydrolases	64	426	1.43e-17	IPR029058	Alpha/Beta hydrolase fold
A0A0H5R2S4	473	Gene3D	G3DSA:3.40.50.1820	alpha/beta hydrolase	33	452	2e-141	IPR029058	Alpha/Beta hydrolase fold
A0A0H5R2S4	473	SUPERFAMILY	SSF53474	alpha/beta-Hydrolases	57	202	7.12e-19	IPR029058	Alpha/Beta hydrolase fold
A0A0H5QIL9	511	Gene3D	G3DSA:2.130.10.10	-	115	446	2.5e-07	IPR015943	WD40/YVTN repeat-like-containing domain superfamily
A0A0H5QIL9	511	SUPERFAMILY	SSF50978	WD40 repeat-like	106	387	4.4e-11	IPR036322	WD40-repeat-containing domain superfamily
A0A0H5RB82	372	Gene3D	G3DSA:2.40.70.10	Acid Proteases	45	365	2.2e-115	IPR021109	Aspartic peptidase domain superfamily
A0A0H5RB82	372	SUPERFAMILY	SSF50630	Acid proteases	9	367	1.3e-112	IPR021109	Aspartic peptidase domain superfamily
A0A0H5RB82	372	Pfam	PF00026	Eukaryotic aspartyl protease	56	366	3e-106	IPR033121	Peptidase family A1 domain
A0A0H5RB82	372	Gene3D	G3DSA:2.40.70.10	Acid Proteases	56	212	2.2e-115	IPR021109	Aspartic peptidase domain superfamily
A0A0H5QGD8	231	SUPERFAMILY	SSF48403	Ankyrin repeat	6	146	7.95e-06	IPR036770	Ankyrin repeat-containing domain superfamily
A0A0H5QGD8	231	Pfam	PF12796	Ankyrin repeats (3 copies)	105	194	3.2e-09	IPR002110	Ankyrin repeat
A0A0H5QGD8	231	SUPERFAMILY	SSF48403	Ankyrin repeat	97	209	1.66e-18	IPR036770	Ankyrin repeat-containing domain superfamily
A0A0H5QGD8	231	Gene3D	G3DSA:1.25.40.20	-	4	230	1.3e-21	IPR036770	Ankyrin repeat-containing domain superfamily
A0A0H5R4S6	370	Gene3D	G3DSA:3.30.60.10	-	128	172	6e-06	IPR036861	Endochitinase-like superfamily
A0A0H5R4S6	370	Gene3D	G3DSA:3.30.60.10	-	215	264	4.3e-09	IPR036861	Endochitinase-like superfamily
A0A0H5R4S6	370	Gene3D	G3DSA:3.30.60.10	-	72	114	5.6e-12	IPR036861	Endochitinase-like superfamily
A0A0H5R4S6	370	Pfam	PF00187	Chitin recognition protein	74	108	3.5e-11	IPR001002	Chitin-binding, type 1
A0A0H5R4S6	370	Gene3D	G3DSA:3.30.60.10	-	296	335	1.9e-07	IPR036861	Endochitinase-like superfamily
A0A0H5R4S6	370	SUPERFAMILY	SSF57016	Plant lectins/antimicrobial peptides	215	250	4.32e-07	IPR036861	Endochitinase-like superfamily
A0A0H5R4S6	370	SUPERFAMILY	SSF57016	Plant lectins/antimicrobial peptides	296	330	2.58e-07	IPR036861	Endochitinase-like superfamily
A0A0H5R4S6	370	SUPERFAMILY	SSF57016	Plant lectins/antimicrobial peptides	129	165	2.45e-07	IPR036861	Endochitinase-like superfamily
A0A0H5R4S6	370	SUPERFAMILY	SSF57016	Plant lectins/antimicrobial peptides	72	109	5.37e-10	IPR036861	Endochitinase-like superfamily
A0A0H5RE28	195	Gene3D	G3DSA:3.90.70.30	-	3	195	9.1e-56	IPR038156	Phytochelatin synthase, N-terminal domain superfamily
A0A0H5RE28	195	SUPERFAMILY	SSF54001	Cysteine proteinases	2	195	7.85e-48	IPR038765	Papain-like cysteine peptidase superfamily
A0A0H5RE28	195	Pfam	PF05023	Phytochelatin synthase	3	195	6e-51	IPR007719	Phytochelatin synthase, N-terminal catalytic domain
A0A0H5QVP8	152	Gene3D	G3DSA:3.40.33.10	CAP	1	152	1.8e-30	IPR035940	CAP superfamily
A0A0H5QVP8	152	Pfam	PF00188	Cysteine-rich secretory protein family	15	148	4.7e-16	IPR014044	CAP domain
A0A0H5QVP8	152	SUPERFAMILY	SSF55797	PR-1-like	2	149	1.57e-30	IPR035940	CAP superfamily
A0A0H5R9G1	126	Gene3D	G3DSA:1.25.40.20	-	41	125	8.2e-10	IPR036770	Ankyrin repeat-containing domain superfamily
A0A0H5R9G1	126	Pfam	PF13637	Ankyrin repeats (many copies)	57	96	2.2e-07	IPR002110	Ankyrin repeat
A0A0H5R9G1	126	SUPERFAMILY	SSF48403	Ankyrin repeat	45	105	6.68e-10	IPR036770	Ankyrin repeat-containing domain superfamily
A0A0H5R9B5	255	Pfam	PF02140	Galactose binding lectin domain	22	102	5.2e-10	IPR000922	D-galactoside/L-rhamnose binding SUEL lectin domain
A0A0H5R9B5	255	Pfam	PF02140	Galactose binding lectin domain	155	231	6e-15	IPR000922	D-galactoside/L-rhamnose binding SUEL lectin domain
A0A0H5R9B5	255	Gene3D	G3DSA:2.60.120.740	-	134	238	8.4e-19	IPR043159	D-galactoside/L-rhamnose binding SUEL lectin domain superfamily
A0A0H5R9B5	255	Gene3D	G3DSA:2.60.120.740	-	5	108	1.3e-08	IPR043159	D-galactoside/L-rhamnose binding SUEL lectin domain superfamily
A0A0H5RCH5	152	Pfam	PF01522	Polysaccharide deacetylase	12	122	3.7e-17	IPR002509	NodB homology domain
A0A0H5RCH5	152	Gene3D	G3DSA:3.20.20.370	Glycoside hydrolase/deacetylase	2	140	1.7e-17	-	-
A0A0H5RCH5	152	SUPERFAMILY	SSF88713	Glycoside hydrolase/deacetylase	11	123	6.12e-18	IPR011330	Glycoside hydrolase/deacetylase, beta/alpha-barrel
A0A0H5R421	306	Pfam	PF00722	Glycosyl hydrolases family 16	87	240	7.1e-33	IPR000757	Glycoside hydrolase family 16
A0A0H5R421	306	Gene3D	G3DSA:2.60.120.200	-	28	254	9.7e-37	-	-
A0A0H5R421	306	SUPERFAMILY	SSF49899	Concanavalin A-like lectins/glucanases	30	254	8.94e-32	IPR013320	Concanavalin A-like lectin/glucanase domain superfamily
A0A0H5QL83	306	Pfam	PF00722	Glycosyl hydrolases family 16	87	240	7.1e-33	IPR000757	Glycoside hydrolase family 16
A0A0H5QL83	306	Gene3D	G3DSA:2.60.120.200	-	28	254	9.7e-37	-	-
A0A0H5QL83	306	SUPERFAMILY	SSF49899	Concanavalin A-like lectins/glucanases	30	254	8.94e-32	IPR013320	Concanavalin A-like lectin/glucanase domain superfamily
A0A0H5QRP2	143	SUPERFAMILY	SSF88713	Glycoside hydrolase/deacetylase	10	143	1.21e-28	IPR011330	Glycoside hydrolase/deacetylase, beta/alpha-barrel
A0A0H5QRP2	143	Pfam	PF01522	Polysaccharide deacetylase	12	127	3.3e-18	IPR002509	NodB homology domain
A0A0H5QRP2	143	Gene3D	G3DSA:3.20.20.370	Glycoside hydrolase/deacetylase	3	143	7.1e-27	-	-
A0A0H5R9L6	578	SUPERFAMILY	SSF81301	Nucleotidyltransferase	200	339	5.14e-12	IPR043519	Nucleotidyltransferase superfamily
A0A0H5R9L6	578	Gene3D	G3DSA:1.10.1410.10	-	355	525	1.1e-52	-	-
A0A0H5R9L6	578	SUPERFAMILY	SSF81631	PAP/OAS1 substrate-binding domain	357	535	7.59e-35	-	-
A0A0H5R9L6	578	Pfam	PF03828	Cid1 family poly A polymerase	442	502	1.7e-11	IPR002058	PAP/25A-associated
A0A0H5R9L6	578	Gene3D	G3DSA:3.30.460.10	Beta Polymerase, domain 2	238	354	1.1e-52	IPR043519	Nucleotidyltransferase superfamily
A0A0H5RJF5	186	Gene3D	G3DSA:1.25.40.20	-	122	185	5.2e-09	IPR036770	Ankyrin repeat-containing domain superfamily
A0A0H5RJF5	186	Pfam	PF13857	Ankyrin repeats (many copies)	60	101	2.3e-06	IPR002110	Ankyrin repeat
A0A0H5RJF5	186	Gene3D	G3DSA:1.25.40.20	-	31	121	5.5e-10	IPR036770	Ankyrin repeat-containing domain superfamily
A0A0H5RJF5	186	SUPERFAMILY	SSF48403	Ankyrin repeat	59	180	7.96e-21	IPR036770	Ankyrin repeat-containing domain superfamily
A0A0H5QKS6	297	SUPERFAMILY	SSF54001	Cysteine proteinases	18	267	8.07e-58	IPR038765	Papain-like cysteine peptidase superfamily
A0A0H5QKS6	297	Pfam	PF00112	Papain family cysteine protease	31	259	2.3e-41	IPR000668	Peptidase C1A, papain C-terminal
A0A0H5QKS6	297	Gene3D	G3DSA:3.90.70.10	Cysteine proteinases	7	268	4.7e-69	-	-
A0A0H5R0Z8	101	Pfam	PF13637	Ankyrin repeats (many copies)	65	100	7.2e-05	IPR002110	Ankyrin repeat
A0A0H5R0Z8	101	SUPERFAMILY	SSF48403	Ankyrin repeat	60	100	1.2e-08	IPR036770	Ankyrin repeat-containing domain superfamily
A0A0H5R0Z8	101	Gene3D	G3DSA:1.25.40.20	-	4	101	2.7e-09	IPR036770	Ankyrin repeat-containing domain superfamily
A0A0H5REI1	457	SUPERFAMILY	SSF53474	alpha/beta-Hydrolases	63	456	4.56e-102	IPR029058	Alpha/Beta hydrolase fold
A0A0H5REI1	457	Pfam	PF00450	Serine carboxypeptidase	64	454	5.1e-93	IPR001563	Peptidase S10, serine carboxypeptidase
A0A0H5REI1	457	Gene3D	G3DSA:3.40.50.1820	alpha/beta hydrolase	60	457	1.2e-114	IPR029058	Alpha/Beta hydrolase fold
A0A0H5R0Z3	167	Gene3D	G3DSA:1.25.40.20	-	5	167	1.1e-27	IPR036770	Ankyrin repeat-containing domain superfamily
A0A0H5R0Z3	167	SUPERFAMILY	SSF48403	Ankyrin repeat	45	167	4.35e-26	IPR036770	Ankyrin repeat-containing domain superfamily
A0A0H5R0Z3	167	Pfam	PF12796	Ankyrin repeats (3 copies)	52	114	4.5e-07	IPR002110	Ankyrin repeat
A0A0H5R0Z3	167	Pfam	PF13857	Ankyrin repeats (many copies)	115	167	2e-08	IPR002110	Ankyrin repeat
A0A0H5QH04	246	Pfam	PF00026	Eukaryotic aspartyl protease	31	246	4.7e-31	IPR033121	Peptidase family A1 domain
A0A0H5QH04	246	SUPERFAMILY	SSF50630	Acid proteases	8	246	7.05e-43	IPR021109	Aspartic peptidase domain superfamily
A0A0H5QH04	246	Gene3D	G3DSA:2.40.70.10	Acid Proteases	20	246	3.5e-43	IPR021109	Aspartic peptidase domain superfamily
A0A0H5R504	218	Pfam	PF02815	MIR domain	52	181	2.8e-09	IPR016093	MIR motif
A0A0H5R504	218	Gene3D	G3DSA:2.80.10.50	-	7	199	2.4e-46	-	-
A0A0H5R504	218	SUPERFAMILY	SSF82109	MIR domain	12	191	1.44e-40	IPR036300	Mir domain superfamily
A0A0H5R031	722	Gene3D	G3DSA:2.60.40.1760	glycosyl hydrolase (family 31)	11	238	4.2e-61	-	-
A0A0H5R031	722	SUPERFAMILY	SSF51011	Glycosyl hydrolase domain	639	716	1.58e-13	-	-
A0A0H5R031	722	SUPERFAMILY	SSF51445	(Trans)glycosidases	228	636	1.79e-78	IPR017853	Glycoside hydrolase superfamily
A0A0H5R031	722	Pfam	PF13802	Galactose mutarotase-like	137	200	8.5e-12	IPR025887	Glycoside hydrolase family 31, N-terminal domain
A0A0H5R031	722	Pfam	PF16863	N-terminal barrel of NtMGAM and CtMGAM, maltase-glucoamylase	24	133	1.7e-17	IPR031727	Galactose mutarotase, N-terminal barrel
A0A0H5R031	722	Gene3D	G3DSA:2.60.40.1180	-	623	716	1e-20	IPR013780	Glycosyl hydrolase, all-beta
A0A0H5R031	722	SUPERFAMILY	SSF74650	Galactose mutarotase-like	43	226	1.38e-35	IPR011013	Galactose mutarotase-like domain superfamily
A0A0H5R031	722	Gene3D	G3DSA:3.20.20.80	Glycosidases	240	620	1.2e-126	-	-
A0A0H5R031	722	Pfam	PF01055	Glycosyl hydrolases family 31	219	720	1.1e-142	IPR000322	Glycoside hydrolase family 31
A0A0H5QFI6	163	SUPERFAMILY	SSF57414	Hairpin loop containing domain-like	21	72	1.29e-05	-	-
A0A0H5QFI6	163	Pfam	PF00024	PAN domain	15	65	8.9e-07	IPR003609	PAN/Apple domain
A0A0H5R1T3	399	SUPERFAMILY	SSF48403	Ankyrin repeat	33	397	1.42e-39	IPR036770	Ankyrin repeat-containing domain superfamily
A0A0H5R1T3	399	Pfam	PF12796	Ankyrin repeats (3 copies)	339	399	2.9e-06	IPR002110	Ankyrin repeat
A0A0H5R1T3	399	Pfam	PF12796	Ankyrin repeats (3 copies)	70	161	2e-11	IPR002110	Ankyrin repeat
A0A0H5R1T3	399	Gene3D	G3DSA:1.25.40.20	-	3	205	2.8e-26	IPR036770	Ankyrin repeat-containing domain superfamily
A0A0H5R1T3	399	Gene3D	G3DSA:1.25.40.20	-	211	399	2.4e-24	IPR036770	Ankyrin repeat-containing domain superfamily
A0A0H5QVK8	380	Gene3D	G3DSA:1.25.40.20	-	204	352	1.9e-18	IPR036770	Ankyrin repeat-containing domain superfamily
A0A0H5QVK8	380	Pfam	PF13606	Ankyrin repeat	14	42	0.0029	IPR002110	Ankyrin repeat
A0A0H5QVK8	380	Gene3D	G3DSA:1.25.40.20	-	94	197	1e-09	IPR036770	Ankyrin repeat-containing domain superfamily
A0A0H5QVK8	380	Pfam	PF12796	Ankyrin repeats (3 copies)	228	286	1.9e-07	IPR002110	Ankyrin repeat
A0A0H5QVK8	380	SUPERFAMILY	SSF48403	Ankyrin repeat	9	323	1.2e-26	IPR036770	Ankyrin repeat-containing domain superfamily
A0A0H5QVK8	380	Gene3D	G3DSA:1.25.40.20	-	5	84	7.8e-10	IPR036770	Ankyrin repeat-containing domain superfamily
A0A0H5R5H7	465	Pfam	PF12796	Ankyrin repeats (3 copies)	109	179	2.8e-10	IPR002110	Ankyrin repeat
A0A0H5R5H7	465	Pfam	PF12796	Ankyrin repeats (3 copies)	271	349	2.3e-10	IPR002110	Ankyrin repeat
A0A0H5R5H7	465	Gene3D	G3DSA:1.25.40.20	-	98	232	1e-22	IPR036770	Ankyrin repeat-containing domain superfamily
A0A0H5R5H7	465	Gene3D	G3DSA:1.25.40.20	-	249	423	1.4e-28	IPR036770	Ankyrin repeat-containing domain superfamily
A0A0H5R5H7	465	SUPERFAMILY	SSF48403	Ankyrin repeat	102	375	1.51e-45	IPR036770	Ankyrin repeat-containing domain superfamily
A0A0H5QJ92	746	Gene3D	G3DSA:3.20.20.80	Glycosidases	493	664	6.2e-68	-	-
A0A0H5QJ92	746	Gene3D	G3DSA:3.20.20.80	Glycosidases	318	492	1.2e-52	-	-
A0A0H5QJ92	746	SUPERFAMILY	SSF74650	Galactose mutarotase-like	13	299	7.53e-12	IPR011013	Galactose mutarotase-like domain superfamily
[truncated: 4,003 more rows]
